# Supplementary material for: Pan-Cancer Study on Variants of Canonical miRNA Biogenesis Pathway Components: A Pooled Analysis
Source: MDPI journal article supplement (doi:10.3390/cancers15020338), 2023-01-04
Supplement: s1 [file s1]

# Table of Contents

| Supplementary Table          | Title                                                                                                  | Pages |
|------------------------------|--------------------------------------------------------------------------------------------------------|-------|
| <b>Variant selection</b>     |                                                                                                        |       |
| S1                           | Characteristics and selection criteria of single nucleotide Polymorphisms in microRNA machinery genes. | 2     |
| <b>Quality assessment</b>    |                                                                                                        |       |
| S2                           | Scale for methodological quality assessment.                                                           | 3     |
| S3                           | Quality score assessment for included studies.                                                         | 4     |
| <b>Study characteristics</b> |                                                                                                        |       |
| S4                           | Characteristics of the included studies.                                                               | 7     |
| S5                           | Distribution of samples according to the type of cancer.                                               | 11    |
| <b>Pooled analysis</b>       |                                                                                                        |       |
| S6                           | Meta-analysis of the association between <b>DROSHA (A &gt; G; rs10719)</b> variant and cancer risk.    | 12    |
| S7                           | Meta-analysis of the association between <b>DROSHA (G &gt; C; rs6877842)</b> variant and cancer risk.  | 14    |
| S8                           | Meta-analysis of the association between <b>DGCR8 (G &gt; A; rs3757)</b> variant and cancer risk.      | 16    |
| S9                           | Meta-analysis of the association between <b>DGCR8 (G &gt; A; rs417309)</b> variant and cancer risk.    | 18    |
| S10                          | Meta-analysis of the association between <b>DGCR8 (T &gt; G; rs1640299)</b> variant and cancer risk.   | 20    |
| S11                          | Meta-analysis of the association between <b>XPO5 (T &gt; G; rs11077)</b> variant and cancer risk.      | 22    |
| S12                          | Meta-analysis of the association between <b>RAN (C &gt; T; rs14035)</b> variant and cancer risk.       | 25    |
| S13                          | Meta-analysis of the association between <b>RAN (A &gt; G; rs3803012)</b> variant and cancer risk.     | 28    |
| S14                          | Meta-analysis of the association between <b>DICER (A &gt; T; rs13078)</b> variant and cancer risk.     | 30    |
| S15                          | Meta-analysis of the association between <b>DICER (T &gt; C; rs1057035)</b> variant and cancer risk.   | 32    |
| S16                          | Meta-analysis of the association between <b>DICER (A &gt; G; rs3742330)</b> variant and cancer risk.   | 34    |
| S17                          | Meta-analysis of the association between <b>TARBP2 (G &gt; A; rs784567)</b> variant and cancer risk.   | 37    |
| S18                          | Meta-analysis of the association between <b>AGO1 (A &gt; G; rs595961)</b> variant and cancer risk.     | 39    |
| S19                          | Meta-analysis of the association between <b>AGO1 (G &gt; A; rs636832)</b> variant and cancer risk.     | 41    |
| S20                          | Meta-analysis of the association between <b>AGO2 (C &gt; A; rs4961280)</b> variant and cancer risk.    | 43    |
| S21                          | Meta-analysis of the association between <b>GEMIN3 (T &gt; C; rs197412)</b> variant and cancer risk.   | 45    |
| S22                          | Meta-analysis of the association between <b>GEMIN3 (C &gt; A; rs197414)</b> variant and cancer risk.   | 47    |
| S23                          | Meta-analysis of the association between <b>GEMIN4 (G &gt; A; rs7813)</b> variant and cancer risk.     | 49    |
| S24                          | Meta-analysis of the association between <b>GEMIN4 (G &gt; C; rs2740348)</b> variant and cancer risk.  | 51    |
| S25                          | Meta-analysis of the association between <b>GEMIN4 (C &gt; T; rs3744741)</b> variant and cancer risk.  | 54    |
| S26                          | Meta-analysis of the association between <b>PIWIL1 rs1106042 G &gt; A</b> variant and cancer risk.     | 57    |
| S27                          | Meta-analysis of the association between <b>PIWIL1 rs10773771 C &gt; T</b> variant and cancer risk.    | 59    |
| <b>TCGA results</b>          |                                                                                                        |       |
| S28                          | Overall survival analysis for TCGA pan-cancer dataset .                                                | 61    |
| S29                          | Disease-specific survival analysis for TCGA pan-cancer dataset.                                        | 61    |

Supplementary Tables S30 to S36 is in a separate excel file.

Supplementary Table S1. Characteristics and selection criteria of single nucleotide Polymorphisms in microRNA machinery genes.

| Gene           | SNP ID     | Alleles | MAF      | Ancestral | Location  | dbSNP     | Chr | Position     | Function                           | Reason for Selection | Total Citations | Citations for cancer |
|----------------|------------|---------|----------|-----------|-----------|-----------|-----|--------------|------------------------------------|----------------------|-----------------|----------------------|
| DROSHA         | rs10719    | A/G/T   | 0.48 (A) | A         | 31401340  | A>G / A>T | 5   | 3' UTR       | 3' UTR variant                     | Bibliographic        | 50              | 10                   |
|                | rs6877842  | G/C     | 0.14 (C) | G         | 31532531  | G>C       | 5   | Intron       | Intron variant                     | Bibliographic        | 25              | 8                    |
|                | rs642321   | T/C     | 0.32 (T) | T         | 31400896  | T>C       | 5   | 3' UTR       | 3' UTR variant                     | Bibliographic        | 17              | 3                    |
|                | rs644236   | T/C     | 0.47 (C) | C         | 31409008  | T>C       | 5   | Intron       | Non-coding transcript exon variant | Bibliographic        | 7               | 1                    |
|                | rs2287584  | T/C     | 0.45 (C) | C         | 31422900  | T>C       | 5   | Synonymous   | Synonymous variant                 | Bibliographic        | 4               | 1                    |
|                | rs2291109  | A/G/T   | 0.06 (A) | T         | 31532322  | A>G / A>T | 5   | 5' UTR       | 5' UTR variant                     | Bibliographic        | 2               | 1                    |
|                | rs3805500  | G/A     | 0.50 (G) | G         | 31462870  | G>A       | 5   | Intron       | Intron variant                     | Bibliographic        | 6               | 1                    |
| DICER1         | rs4867329  | A/C     | 0.37 (C) | A         | 31435520  | A>C       | 5   | Intron       | Intron variant                     | Bibliographic        | 6               | 1                    |
|                | rs13078    | A/T     | 0.09 (A) | T         | 95090410  | A>T       | 14  | 3' UTR       | 3' UTR variant                     | Bibliographic        | 39              | 9                    |
|                | rs1057035  | T/C     | 0.17 (C) | T         | 95087805  | T>C       | 14  | 3' UTR       | 3' UTR variant                     | Bibliographic        | 35              | 11                   |
|                | rs3742330  | A/G     | 0.14 (G) | A         | 95087025  | A>G       | 14  | 3' UTR       | 3' UTR variant                     | Bibliographic        | 58              | 16                   |
|                | rs12323635 | C/T     | 0.49 (T) | T         | 95159374  | C>T       | 14  | Intron       | Intron variant                     | Bibliographic        | 8               | 1                    |
| XPO5           | rs11077    | T/G     | 0.40 (G) | G         | 43523209  | T>G       | 6   | 3' UTR       | 3' UTR variant                     | Bibliographic        | 57              | 13                   |
|                | rs1106841  | A/C     | 0.39 (C) | C         | 43528924  | A>C       | 6   | p.Arg893=    | Splice region variant              | Bibliographic        | 3               | 1                    |
|                | rs2257082  | G/A     | 0.32 (A) | G         | 43524840  | G>A       | 6   | p.Tyr1101=   | Synonymous variant                 | Bibliographic        | 10              | 3                    |
|                | rs11544382 | A/G     | NA       | A         | 43524604  | A>G       | 6   | p.Met1115Thr | Missense variant                   | Bibliographic        | 6               | 1                    |
|                | rs34324334 | C/T     | 0.04 (T) | C         | 43567281  | C>T       | 6   | p.Ser241Asn  | Missense variant                   | Bibliographic        | 4               | 1                    |
| RAN            | rs14035    | C/T     | 0.27 (T) | T         | 130876696 | C>T       | 12  | 3'UTR        | 3' UTR variant                     | Bibliographic        | 45              | 12                   |
|                | rs3803012  | A/C/G   | 0.01 (G) | A         | 130876170 | A>C / A>G | 12  | 3'UTR        | 3' UTR variant                     | Bibliographic        | 11              | 5                    |
|                | rs3809142  | C/G/T   | 0.12 (T) | C         | 130871001 | C>G / C>T | 12  | NA           | Upstream variant                   | Bibliographic        | 1               | 1                    |
|                | rs7301722  | C/A     | 0.42     | A         | 130871510 | C>A       | 12  | NA           | Upstream variant                   | Bibliographic        | 1               | 1                    |
|                | rs7132224  | A/G     | 0.30 (G) | G         | 130871501 | A>G       | 12  | NA           | Upstream variant                   | Bibliographic        | 1               | 1                    |
|                | rs56109543 | C/T     | 0.17 (T) | C         | 130870520 | C>T       | 12  | NA           | Upstream variant                   | Bibliographic        | 1               | 1                    |
|                | rs3757     | G/A     | 0.18 (A) | G         | 20111808  | G>A       | 22  | 3' UTR       | 3' UTR variant                     | Bibliographic        | 31              | 7                    |
| DGCR8          | rs417309   | G/A     | 0.04 (A) | G         | 20111021  | G>A       | 22  | 3' UTR       | 3' UTR variant                     | Bibliographic        | 21              | 7                    |
|                | rs1640299  | T/G     | 0.38 (G) | G         | 20110836  | T>G       | 22  | 3' UTR       | 3' UTR variant                     | Bibliographic        | 23              | 8                    |
|                | rs720012   | G/A     | 0.22 (A) | G         | 20111059  | G>A       | 22  | 3' UTR       | 3' UTR variant                     | Bibliographic        | 11              | 1                    |
|                | rs720014   | T/C     | 0.18 (C) | T         | 20111359  | T>C       | 22  | 3' UTR       | 3' UTR variant                     | Bibliographic        | 8               | 3                    |
|                | rs1558496  | T/C     | 0.14 (C) | C         | 20084214  | T>C       | 22  | Intron       | Intron variant                     | Bibliographic        | 2               | 1                    |
|                | rs11089328 | A/G     | 0.48 (G) | G         | 20092080  | A>G       | 22  | Intron       | Intron variant                     | Bibliographic        | 2               | 1                    |
|                | rs9605062  | T/C     | 0.25 (C) | C         | 20102357  | T>C       | 22  | Intron       | Intron variant                     | Bibliographic        | 2               | 1                    |
|                | rs9606250  | A/T     | 0.14 (T) | T         | 20102669  | A>T       | 22  | Intron       | Intron variant                     | Bibliographic        | 3               | 1                    |
|                | rs9606248  | A/G     | 0.09 (G) | G         | 20100016  | A>G       | 22  | Intron       | Intron variant                     | Bibliographic        | 4               | 1                    |
|                | rs197388   | A/T     | 0.24 (T) | T         | 111754860 | A>T       | 1   | 5' UTR       | Upstream variant                   | Bibliographic        | 11              | 3                    |
|                | rs197412   | T/C     | 0.47 (C) | C         | 111766331 | T>C       | 1   | p.Ile636Thr  | Missense variant                   | Bibliographic        | 43              | 9                    |
|                | rs197414   | C/A/T   | 0.17 (A) | C         | 111766501 | C>A / C>T | 1   | p.Arg693Ser  | Missense variant                   | Bibliographic        | 32              | 5                    |
| GEMIN3 (DDX20) | rs7813     | G/A/C   | 0.29 (G) | G         | 744946    | G>A / G>C | 17  | p.Arg1033Cys | Missense variant                   | Bibliographic        | 55              | 14                   |
|                | rs2740348  | G/C/T   | 0.11 (G) | C         | 746695    | G>C / G>T | 17  | p.Gln450Glu  | Missense variant                   | Bibliographic        | 43              | 11                   |
|                | rs2740349  | C/G/T   | 0.11 (C) | T         | 745258    | C>G / C>T | 17  | p.Asp929Asn  | Missense variant                   | Bibliographic        | 11              | 1                    |
|                | rs910924   | G/A     | 0.16 (A) | G         | 752680    | G>A       | 17  | 5' UTR       | 5' UTR variant                     | Bibliographic        | 16              | 3                    |
|                | rs910925   | G/C     | 0.29 (G) | G         | 746307    | G>C       | 17  | p.Ala579Val  | Missense variant                   | Bibliographic        | 19              | 4                    |
|                | rs1045481  | G/A/C   | 0.16 (A) | G         | 744917    | G>A / G>C | 17  | p.Ile1042=   | Missense variant                   | Bibliographic        | 5               | 0                    |
|                | rs1045491  | C/T     | 0.16 (T) | C         | 744748    | C>T       | 17  | 3' UTR       | 3' UTR variant                     | Bibliographic        | 6               | 1                    |
|                | rs1062923  | A/G     | 0.07 (G) | A         | 745827    | A>G       | 17  | p.Ile739Thr  | Missense variant                   | Bibliographic        | 23              | 3                    |
|                | rs3087833  | G/A     | 0.16 (A) | G         | 754490    | G>A       | 17  | Promoter     | Non-coding transcript exon variant | Bibliographic        | 2               | 0                    |
|                | rs3744741  | C/T     | 0.28 (T) | C         | 745992    | C>T       | 17  | p.Arg684Gln  | Missense variant                   | Bibliographic        | 28              | 9                    |
|                | rs4968104  | T/A     | 0.16 (A) | T         | 746265    | T>A       | 17  | p.Glu593Val  | Missense variant                   | Bibliographic        | 30              | 4                    |
|                | rs636832   | G/A     | 0.37 (A) | A         | 35897874  | G>A       | 1   | Intron       | Intron variant                     | Bibliographic        | 35              | 6                    |
| AGO1           | rs595055   | T/C     | 0.49 (T) | C         | 35914532  | T>C       | 1   | Intron       | Intron variant                     | Bibliographic        | 7               | 1                    |
|                | rs595961   | A/G     | 0.45 (A) | G         | 35902179  | A>G       | 1   | Intron       | Intron variant                     | Bibliographic        | 26              | 5                    |
|                | rs11584005 | A/G     | 0.01 (G) | A         | 35881973  | A>G       | 1   | Intron       | Intron variant                     | Bibliographic        | 9               | 0                    |
|                | rs4961280  | C/A/T   | 0.15 (A) | A         | 140637315 | C>A / C>T | 8   | NA           | Non-coding transcript exon variant | Bibliographic        | 13              | 5                    |
| AGO2           | rs77216619 | G/A/T   | 0.01 (T) | G         | 140586834 | G>A / G>T | 8   | Intron       | Intron variant                     | Bibliographic        | 16              | 0                    |
|                | rs78796470 | C/T     | 0.04 (T) | C         | 140586871 | C>T       | 8   | Intron       | Intron variant                     | Bibliographic        | 16              | 0                    |
|                | rs2176397  | C/T     | 0.30 (T) | C         | 140612438 | C>T       | 8   | Intron       | Intron variant                     | Bibliographic        | 16              | 1                    |
|                | rs2292779  | G/C/T   | 0.33 (G) | C         | 140551294 | G>C / G>T | 8   | Intron       | Intron variant                     | Bibliographic        | 9               | 1                    |
|                | rs3864659  | A/C     | 0.14 (C) | A         | 140545763 | A>C       | 8   | Intron       | Intron variant                     | Bibliographic        | 11              | 2                    |
|                | rs11786030 | G/A     | 0.21 (G) | A         | 140620073 | G>A       | 8   | Intron       | Intron variant                     | Bibliographic        | 16              | 1                    |
|                | rs7005286  | T/C     | 0.17 (T) | C         | 140584361 | T>C       | 8   | Intron       | Intron variant                     | Bibliographic        | 9               | 0                    |
| TARBP2         | rs784567   | G/A/T   | 0.22 (A) | G         | 53500681  | G>A / G>T | 12  | Promoter     | Non-coding transcript exon variant | Bibliographic        | 22              | 5                    |
|                | rs34649330 | C/T     | 0.08 (T) | C         | 53499247  | C>T       | 12  | Intron       | Intron variant                     | Bibliographic        | 1               | 1                    |
| PIWIL1         | rs10773771 | C/T     | 0.50 (T) | C         | 130371771 | C>T       | 12  | 3' UTR       | 3' UTR variant                     | Bibliographic        | 8               | 7                    |
|                | rs11060845 | G/T     | 0.13 (T) | G         | 130367629 | G>T       | 12  | Intron       | Intron variant                     | Bibliographic        | 7               | 5                    |
|                | rs1106042  | G/A     | 0.09 (A) | A         | 130357093 | G>A       | 12  | p.Arg527Lys  | Missense variant                   | Bibliographic        | 8               | 4                    |

Supplementary Table S2. Scale for methodological quality assessment.

| Criterion                                                                                                               | Score |
|-------------------------------------------------------------------------------------------------------------------------|-------|
| <b>1. Representativeness of cases</b>                                                                                   |       |
| Selected from population or cancer registry or multiple cancer center sites                                             | 2     |
| Selected from hospital (Oncology Department or Cancer Institute)                                                        | 1.5   |
| Selected from pathology archives, but without description                                                               | 1     |
| Not described                                                                                                           | 0     |
| <b>2. Source of controls</b>                                                                                            |       |
| Population or community based                                                                                           | 3     |
| Blood donors or volunteers                                                                                              | 2     |
| Hospital-based (cancer-free controls)                                                                                   | 1.5   |
| Healthy volunteers, but without total description                                                                       | 1     |
| Cancer-free controls with related diseases                                                                              | 0.5   |
| Not described                                                                                                           | 0     |
| <b>3. Ascertainment of relevant cancer</b>                                                                              |       |
| Histological or pathological confirmation                                                                               | 2     |
| Diagnosis of cancer by patient medical record                                                                           | 1     |
| Not described                                                                                                           | 0     |
| <b>4. Case-control match</b>                                                                                            |       |
| Matched by age and gender                                                                                               | 1     |
| Not matched by age and gender                                                                                           | 0     |
| <b>5. Quality control of genotyping method</b>                                                                          |       |
| Repetition of partial/total tested samples with a different method                                                      | 2     |
| Repetition of partial/total tested samples with the same method                                                         | 1     |
| Not described                                                                                                           | 0     |
| <b>6. Genotyping examination</b>                                                                                        |       |
| Genotyping done under "blinded" condition                                                                               | 1     |
| Unblinded or not mentioned                                                                                              | 0     |
| <b>7. Specimens used for determining genotypes</b>                                                                      |       |
| White blood cells or normal tissues                                                                                     | 1     |
| Tumor tissues or exfoliated cells of tissue                                                                             | 0     |
| <b>8. Hardy-Weinberg equilibrium in controls</b>                                                                        |       |
| Hardy-Weinberg equilibrium                                                                                              | 1     |
| Hardy-Weinberg disequilibrium                                                                                           | 0     |
| <b>9. Total sample size</b>                                                                                             |       |
| >1000                                                                                                                   | 3     |
| >500 and <1000                                                                                                          | 2     |
| >200 and <500                                                                                                           | 1     |
| <200                                                                                                                    | 0     |
| <b>10. Association assessment</b>                                                                                       |       |
| Assess association between genotypes and relevant cancer with appropriate statistics and adjustment for confounders     | 2     |
| Assess association between genotypes and relevant cancer with appropriate statistics without adjustment for confounders | 1     |
| Inappropriate statistics used                                                                                           | 0     |

Supplementary Table S3. Quality score assessment for included studies.

| N | Gene   | SNP       | First author            | Year | I   | II  | III | IV | V | VI | VII | VIII | IX | X  | Total |
|---|--------|-----------|-------------------------|------|-----|-----|-----|----|---|----|-----|------|----|----|-------|
| 1 | DROSHA | rs10719   | Bermisheva              | 2018 | 2   | 3   | 0   | 0  | 1 | 0  | 1   | 1    | 2  | 1  | 11    |
|   |        |           | Song                    | 2017 | 1.5 | 1.5 | 2   | 1  | 1 | 0  | 1   | 1    | 3  | 2  | 14    |
|   |        |           | Kim                     | 2016 | 1.5 | 3   | 0   | 1  | 2 | 1  | 1   | 1    | 1  | 2  | 13.5  |
|   |        |           | Martin-Guerrero         | 2015 | 2   | 3   | 2   | 1  | 1 | 0  | 1   | 1    | 1  | 2  | 14    |
|   |        |           | Cho                     | 2015 | 1.5 | 3   | 2   | 1  | 2 | 1  | 1   | 1    | 2  | 2  | 16.5  |
|   |        |           | Yuan                    | 2013 | 2   | 1.5 | 2   | 1  | 1 | 0  | 1   | 1    | 3  | 2  | 14.5  |
|   |        |           | Jiang                   | 2013 | 2   | 3   | 2   | 1  | 1 | 0  | 1   | 1    | 3  | 2  | 16    |
|   |        |           | Kim                     | 2010 | 1.5 | 1.5 | 2   | 1  | 1 | 0  | 1   | 1    | 0  | 2  | 11    |
|   |        |           | Yang                    | 2008 | 2   | 3   | 2   | 1  | 1 | 1  | 1   | 0    | 2  | 2  | 15    |
| 2 | DROSHA | rs6877842 | Horikawa                | 2008 | 1.5 | 3   | 2   | 1  | 1 | 1  | 1   | 1    | 1  | 2  | 14.5  |
|   |        |           | Mohammadpour-Gharehbagh | 2019 | 1.5 | 3   | 2   | 1  | 1 | 0  | 1   | 1    | 1  | 1  | 12.5  |
|   |        |           | Kim                     | 2016 | 1.5 | 3   | 0   | 1  | 2 | 1  | 1   | 1    | 1  | 2  | 13.5  |
|   |        |           | Bruzgilewicz            | 2016 | 1.5 | 3   | 2   | 1  | 1 | 0  | 1   | 1    | 0  | 1  | 11.5  |
|   |        |           | Osuch-Wojcikiewicz      | 2015 | 1.5 | 1.5 | 2   | 1  | 1 | 0  | 0   | 1    | 1  | 1  | 10    |
|   |        |           | Martin-Guerrero         | 2015 | 2   | 3   | 2   | 1  | 1 | 0  | 1   | 1    | 1  | 2  | 14    |
|   |        |           | Kim                     | 2010 | 1.5 | 1.5 | 2   | 1  | 1 | 0  | 1   | 1    | 0  | 2  | 11    |
|   |        |           | Yang                    | 2008 | 2   | 3   | 2   | 1  | 1 | 1  | 1   | 1    | 3  | 2  | 17    |
|   |        |           | Horikawa                | 2008 | 1.5 | 3   | 2   | 1  | 1 | 1  | 1   | 1    | 2  | 2  | 15.5  |
| 3 | DICER1 | rs13078   | Huang                   | 2018 | 1.5 | 3   | 2   | 1  | 1 | 0  | 1   | 1    | 2  | 2  | 14.5  |
|   |        |           | Kim                     | 2016 | 1.5 | 3   | 0   | 1  | 2 | 1  | 1   | 1    | 1  | 2  | 13.5  |
|   |        |           | Osuch-Wojcikiewicz      | 2015 | 1.5 | 1.5 | 2   | 1  | 1 | 0  | 0   | 0    | 1  | 1  | 9     |
|   |        |           | Martin-Guerrero         | 2015 | 2   | 3   | 2   | 1  | 1 | 0  | 1   | 1    | 1  | 2  | 14    |
|   |        |           | Yuan                    | 2013 | 2   | 1.5 | 2   | 1  | 1 | 0  | 1   | 1    | 3  | 2  | 14.5  |
|   |        |           | Jiang                   | 2013 | 2   | 3   | 2   | 1  | 1 | 0  | 1   | 1    | 3  | 2  | 16    |
|   |        |           | Kim                     | 2010 | 1.5 | 1.5 | 2   | 1  | 1 | 0  | 1   | 1    | 0  | 2  | 11    |
|   |        |           | Yang                    | 2008 | 2   | 3   | 2   | 1  | 1 | 1  | 1   | 1    | 3  | 2  | 17    |
|   |        |           | Horikawa                | 2008 | 1.5 | 3   | 2   | 1  | 1 | 1  | 1   | 1    | 2  | 2  | 15.5  |
| 4 | DICER1 | rs1057035 | Wang                    | 2017 | 1.5 | 1.5 | 2   | 1  | 1 | 0  | 1   | 1    | 2  | 2  | 13    |
|   |        |           | Yuan                    | 2016 | 1.5 | 3   | 2   | 1  | 1 | 0  | 1   | 1    | 3  | 2  | 15.5  |
|   |        |           | Martin-Guerrero         | 2015 | 2   | 3   | 2   | 1  | 1 | 0  | 1   | 1    | 1  | 2  | 14    |
|   |        |           | Yuan                    | 2013 | 2   | 1.5 | 2   | 1  | 1 | 0  | 1   | 1    | 3  | 2  | 14.5  |
|   |        |           | Slaby                   | 2013 | 1.5 | 2   | 2   | 1  | 1 | 0  | 1   | 1    | 1  | 1  | 11.5  |
|   |        |           | Liu                     | 2013 | 1.5 | 3   | 2   | 1  | 1 | 0  | 1   | 1    | 3  | 2  | 15.5  |
|   |        |           | Jiang                   | 2013 | 2   | 3   | 2   | 1  | 1 | 0  | 1   | 1    | 3  | 2  | 16    |
|   |        |           | Zu                      | 2013 | 1.5 | 1.5 | 0   | 1  | 1 | 0  | 0   | 1    | 3  | 2  | 11    |
|   |        |           | Chen                    | 2013 | 2   | 3   | 2   | 1  | 1 | 0  | 1   | 1    | 3  | 2  | 16    |
| 5 | DICER1 | rs3742330 | Wang                    | 2012 | 1.5 | 3   | 2   | 1  | 1 | 0  | 0   | 0    | 3  | 2  | 13.5  |
|   |        |           | Ma                      | 2012 | 2   | 3   | 0   | 1  | 1 | 0  | 1   | 1    | 3  | 2  | 14    |
|   |        |           | Mohammadpour-Gharehbagh | 2019 | 1.5 | 3   | 2   | 1  | 1 | 0  | 1   | 1    | 1  | 1  | 12.5  |
|   |        |           | Kim                     | 2019 | 1.5 | 1.5 | 2   | 1  | 1 | 0  | 1   | 1    | 3  | 2  | 14    |
|   |        |           | Oz                      | 2018 | 0   | 1.5 | 2   | 1  | 1 | 0  | 1   | 0    | 0  | 1  | 7.5   |
|   |        |           | Huang                   | 2018 | 1.5 | 3   | 2   | 1  | 1 | 0  | 1   | 0    | 2  | 2  | 13.5  |
|   |        |           | Song                    | 2017 | 1.5 | 1.5 | 2   | 1  | 1 | 0  | 1   | 1    | 3  | 2  | 14    |
|   |        |           | Nikolic                 | 2017 | 1.5 | 1   | 0   | 1  | 1 | 0  | 1   | 1    | 2  | 2  | 10.5  |
|   |        |           | Yuan                    | 2016 | 1.5 | 3   | 2   | 1  | 1 | 0  | 1   | 1    | 3  | 2  | 15.5  |
| 6 | XPO5   | rs11077   | Peckham-Gregory         | 2016 | 2   | 1.5 | 1   | 1  | 1 | 0  | 1   | 1    | 2  | 2  | 12.5  |
|   |        |           | Kim                     | 2016 | 1.5 | 3   | 0   | 1  | 2 | 1  | 1   | 1    | 1  | 2  | 13.5  |
|   |        |           | Osuch-Wojcikiewicz      | 2015 | 1.5 | 1.5 | 2   | 1  | 1 | 0  | 0   | 0    | 1  | 1  | 9     |
|   |        |           | Cho                     | 2015 | 1.5 | 3   | 2   | 1  | 2 | 1  | 1   | 1    | 2  | 2  | 16.5  |
|   |        |           | Zheng                   | 2013 | NA  | 3   | NA  | NA | 1 | NA | NA  | 1    | 2  | NA | NA    |
|   |        |           | Yuan                    | 2013 | 2   | 1.5 | 2   | 1  | 1 | 0  | 1   | 1    | 3  | 2  | 14.5  |
|   |        |           | Kim                     | 2010 | 1.5 | 1.5 | 2   | 1  | 1 | 0  | 1   | 1    | 0  | 2  | 11    |
|   |        |           | Yang                    | 2008 | 2   | 3   | 2   | 1  | 1 | 1  | 1   | 1    | 3  | 2  | 17    |
|   |        |           | Horikawa                | 2008 | 1.5 | 3   | 2   | 1  | 1 | 1  | 1   | 1    | 2  | 2  | 15.5  |
| 7 | RAN    | rs14035   | Mohammadpour-Gharehbagh | 2019 | 1.5 | 3   | 2   | 1  | 1 | 0  | 1   | 1    | 1  | 1  | 12.5  |
|   |        |           | Thakkar                 | 2018 | 1.5 | 3   | 0   | 1  | 1 | 0  | 1   | 1    | 1  | 1  | 10.5  |
|   |        |           | Huang                   | 2018 | 1.5 | 3   | 2   | 1  | 1 | 0  | 1   | 1    | 1  | 2  | 13.5  |
|   |        |           | Wen                     | 2017 | 2   | 1.5 | 2   | 1  | 1 | 0  | 1   | 1    | 3  | 2  | 14.5  |
|   |        |           | Peckham-Gregory         | 2016 | 2   | 1.5 | 1   | 1  | 1 | 0  | 1   | 1    | 2  | 2  | 12.5  |
|   |        |           | Kim                     | 2016 | 1.5 | 3   | 0   | 1  | 2 | 1  | 1   | 1    | 1  | 2  | 13.5  |
|   |        |           | Zhao                    | 2015 | 1.5 | 3   | 0   | 1  | 1 | 0  | 1   | 1    | 1  | 1  | 10.5  |
|   |        |           | Xie                     | 2015 | 1.5 | 3   | 0   | 1  | 1 | 0  | 1   | 1    | 1  | 1  | 10.5  |
|   |        |           | Osuch-Wojcikiewicz      | 2015 | 1.5 | 1.5 | 2   | 1  | 1 | 0  | 0   | 0    | 1  | 1  | 9     |
| 8 | RAN    | rs14035   | Cho                     | 2015 | 1.5 | 3   | 2   | 1  | 2 | 1  | 1   | 1    | 2  | 2  | 16.5  |
|   |        |           | Kim                     | 2010 | 1.5 | 1.5 | 2   | 1  | 1 | 0  | 1   | 0    | 0  | 2  | 10    |
|   |        |           | Yang                    | 2008 | 2   | 3   | 2   | 1  | 1 | 1  | 1   | 1    | 3  | 2  | 17    |
|   |        |           | Horikawa                | 2008 | 1.5 | 3   | 2   | 1  | 1 | 1  | 1   | 0    | 2  | 2  | 14.5  |
|   |        |           | Wang                    | 2018 | 2   | 1.5 | 0   | 1  | 1 | 0  | 1   | 1    | 3  | 2  | 12.5  |
|   |        |           | Huang                   | 2018 | 1.5 | 3   | 2   | 1  | 1 | 0  | 1   | 1    | 2  | 2  | 14.5  |
|   |        |           | Peckham-Gregory         | 2016 | 2   | 1.5 | 1   | 1  | 1 | 0  | 1   | 1    | 2  | 2  | 12.5  |
|   |        |           | Kim                     | 2016 | 1.5 | 3   | 0   | 1  | 2 | 1  | 1   | 1    | 1  | 2  | 13.5  |
|   |        |           | Osuch-Wojcikiewicz      | 2015 | 1.5 | 1.5 | 2   | 1  | 1 | 0  | 0   | 0    | 1  | 1  | 9     |
| 9 | RAN    | rs14035   | Martin-Guerrero         | 2015 | 2   | 3   | 2   | 1  | 1 | 0  | 1   | 1    | 1  | 2  | 14    |
|   |        |           | Cho                     | 2015 | 1.5 | 3   | 2   | 1  | 2 | 1  | 1   | 1    | 2  | 2  | 16.5  |
|   |        |           | Roy                     | 2014 | 2   | 1.5 | 2   | 0  | 1 | 0  | 1   | 1    | 2  | 2  | 12.5  |
|   |        |           | Li                      | 2012 | 2   | 3   | 2   | 1  | 2 | 0  | 1   | 1    | 3  | 1  | 16    |

|    |        |           |                    |      |     |     |   |   |   |   |   |   |   |   |      |
|----|--------|-----------|--------------------|------|-----|-----|---|---|---|---|---|---|---|---|------|
| 8  | RAN    | rs3803012 | Kim                | 2010 | 1.5 | 1.5 | 2 | 1 | 1 | 0 | 1 | 1 | 0 | 2 | 11   |
|    |        |           | Yang               | 2008 | 2   | 3   | 2 | 1 | 1 | 1 | 1 | 0 | 3 | 2 | 16   |
|    |        |           | Horikawa           | 2008 | 1.5 | 3   | 2 | 1 | 1 | 1 | 1 | 1 | 2 | 2 | 15.5 |
|    |        |           | Wang               | 2017 | 1.5 | 1.5 | 2 | 1 | 1 | 0 | 1 | 1 | 2 | 2 | 13   |
|    |        |           | Liu                | 2013 | 1.5 | 3   | 2 | 1 | 1 | 0 | 1 | 1 | 3 | 2 | 15.5 |
|    |        |           | Jiang              | 2013 | 2   | 3   | 2 | 1 | 1 | 0 | 1 | 1 | 3 | 2 | 16   |
| 9  | DGCR8  | rs3757    | Chen               | 2013 | 2   | 3   | 2 | 1 | 1 | 0 | 1 | 1 | 3 | 2 | 16   |
|    |        |           | Ma                 | 2012 | 2   | 3   | 0 | 1 | 1 | 0 | 1 | 1 | 3 | 2 | 14   |
|    |        |           | Osuch-Wojcikiewicz | 2015 | 1.5 | 1.5 | 2 | 1 | 1 | 0 | 0 | 0 | 1 | 1 | 9    |
|    |        |           | Mi                 | 2014 | 2   | 1.5 | 2 | 1 | 1 | 0 | 1 | 1 | 2 | 2 | 13.5 |
|    |        |           | Zu                 | 2013 | 1.5 | 1.5 | 0 | 1 | 1 | 0 | 0 | 1 | 3 | 2 | 11   |
|    |        |           | Wang               | 2012 | 1.5 | 3   | 2 | 1 | 1 | 0 | 0 | 0 | 3 | 2 | 13.5 |
| 10 | DGCR8  | rs1640299 | Kim                | 2010 | 1.5 | 1.5 | 2 | 1 | 1 | 0 | 1 | 1 | 0 | 2 | 11   |
|    |        |           | Yang               | 2008 | 2   | 3   | 2 | 1 | 1 | 1 | 1 | 1 | 3 | 2 | 17   |
|    |        |           | Horikawa           | 2008 | 1.5 | 3   | 2 | 1 | 1 | 1 | 1 | 1 | 2 | 2 | 15.5 |
|    |        |           | Bermisheva         | 2018 | 2   | 3   | 0 | 0 | 1 | 0 | 1 | 1 | 2 | 1 | 11   |
|    |        |           | Bruzgilewicz       | 2016 | 1.5 | 3   | 2 | 1 | 1 | 0 | 1 | 1 | 0 | 1 | 11.5 |
|    |        |           | Osuch-Wojcikiewicz | 2015 | 1.5 | 1.5 | 2 | 1 | 1 | 0 | 0 | 0 | 1 | 1 | 9    |
| 11 | DGCR8  | rs417309  | Martin-Guerrero    | 2015 | 2   | 3   | 2 | 1 | 1 | 0 | 1 | 1 | 1 | 2 | 14   |
|    |        |           | Jiang              | 2013 | 2   | 3   | 2 | 1 | 1 | 0 | 1 | 1 | 3 | 2 | 16   |
|    |        |           | Kim                | 2010 | 1.5 | 1.5 | 2 | 1 | 1 | 0 | 1 | 1 | 0 | 2 | 11   |
|    |        |           | Yang               | 2008 | 2   | 3   | 2 | 1 | 1 | 1 | 1 | 1 | 3 | 2 | 17   |
|    |        |           | Horikawa           | 2008 | 1.5 | 3   | 2 | 1 | 1 | 1 | 1 | 1 | 2 | 2 | 15.5 |
|    |        |           | Bruzgilewicz       | 2016 | 1.5 | 3   | 2 | 1 | 1 | 0 | 1 | 1 | 0 | 1 | 11.5 |
| 12 | DDX20  | rs197412  | Osuch-Wojcikiewicz | 2015 | 1.5 | 1.5 | 2 | 1 | 1 | 0 | 0 | 1 | 1 | 1 | 10   |
|    |        |           | Martin-Guerrero    | 2015 | 2   | 3   | 2 | 1 | 1 | 0 | 1 | 1 | 1 | 2 | 14   |
|    |        |           | Jiang              | 2013 | 2   | 3   | 2 | 1 | 1 | 0 | 1 | 1 | 3 | 2 | 16   |
|    |        |           | Kim                | 2010 | 1.5 | 1.5 | 2 | 1 | 1 | 0 | 1 | 1 | 0 | 2 | 11   |
|    |        |           | Yang               | 2008 | 2   | 3   | 2 | 1 | 1 | 1 | 1 | 1 | 3 | 2 | 17   |
|    |        |           | Horikawa           | 2008 | 1.5 | 3   | 2 | 1 | 1 | 1 | 1 | 1 | 2 | 2 | 15.5 |
| 13 | DDX20  | rs197414  | Peckham-Gregory    | 2016 | 2   | 1.5 | 1 | 1 | 1 | 0 | 1 | 1 | 2 | 2 | 12.5 |
|    |        |           | Yuan               | 2016 | 1.5 | 3   | 2 | 1 | 1 | 0 | 1 | 1 | 3 | 2 | 15.5 |
|    |        |           | Martin-Guerrero    | 2015 | 2   | 3   | 2 | 1 | 1 | 0 | 1 | 1 | 1 | 2 | 14   |
|    |        |           | Roy                | 2014 | 2   | 1.5 | 2 | 0 | 1 | 0 | 1 | 1 | 2 | 2 | 12.5 |
|    |        |           | Roy                | 2014 | 2   | 1.5 | 0 | 1 | 1 | 0 | 1 | 1 | 2 | 2 | 11.5 |
|    |        |           | Jiang              | 2013 | 2   | 3   | 2 | 1 | 1 | 0 | 1 | 1 | 3 | 2 | 16   |
| 14 | GEMIN4 | rs7813    | Kim                | 2010 | 1.5 | 1.5 | 2 | 1 | 1 | 0 | 1 | 1 | 0 | 2 | 11   |
|    |        |           | Yang               | 2008 | 2   | 3   | 2 | 1 | 1 | 1 | 1 | 1 | 3 | 2 | 17   |
|    |        |           | Horikawa           | 2008 | 1.5 | 3   | 2 | 1 | 1 | 1 | 1 | 1 | 2 | 2 | 15.5 |
|    |        |           | Nikolic            | 2017 | 1.5 | 1   | 0 | 1 | 1 | 0 | 1 | 1 | 2 | 2 | 10.5 |
|    |        |           | Martin-Guerrero    | 2015 | 2   | 3   | 2 | 1 | 1 | 0 | 1 | 1 | 1 | 2 | 14   |
|    |        |           | Kim                | 2010 | 1.5 | 1.5 | 2 | 1 | 1 | 0 | 1 | 0 | 0 | 2 | 10   |
| 15 | GEMIN4 | rs2740348 | Yang               | 2008 | 2   | 3   | 2 | 1 | 1 | 1 | 1 | 1 | 3 | 2 | 17   |
|    |        |           | Horikawa           | 2008 | 1.5 | 3   | 2 | 1 | 1 | 1 | 1 | 1 | 2 | 2 | 15.5 |
|    |        |           | Ye                 | 2008 | 1.5 | 1.5 | 2 | 1 | 1 | 0 | 1 | 1 | 2 | 2 | 13   |
|    |        |           | Horikawa           | 2008 | 1.5 | 3   | 2 | 1 | 1 | 1 | 1 | 1 | 2 | 2 | 15.5 |
|    |        |           | Bermisheva         | 2018 | 2   | 3   | 0 | 0 | 1 | 0 | 1 | 1 | 2 | 1 | 11   |
|    |        |           | Peckham-Gregory    | 2016 | 2   | 1.5 | 1 | 1 | 1 | 0 | 1 | 1 | 2 | 2 | 12.5 |
| 16 | GEMIN4 | rs3744741 | Mullany            | 2016 | 2   | 3   | 0 | 1 | 1 | 0 | 1 | 1 | 3 | 1 | 13   |
|    |        |           | Gutierrez-Malacatt | 2016 | 2   | 1.5 | 2 | 1 | 1 | 0 | 1 | 1 | 2 | 1 | 12.5 |
|    |        |           | Martin-Guerrero    | 2015 | 2   | 3   | 2 | 1 | 1 | 0 | 1 | 1 | 1 | 2 | 14   |
|    |        |           | Jiang              | 2013 | 2   | 3   | 2 | 1 | 1 | 0 | 1 | 1 | 3 | 2 | 16   |
|    |        |           | Liu                | 2012 | 2   | 1.5 | 2 | 1 | 1 | 0 | 1 | 0 | 2 | 1 | 11.5 |
|    |        |           | Kim                | 2010 | 1.5 | 1.5 | 2 | 1 | 1 | 0 | 1 | 1 | 0 | 2 | 11   |
| 17 | AGO1   | rs595961  | Yang               | 2008 | 2   | 3   | 2 | 1 | 1 | 1 | 1 | 1 | 3 | 2 | 17   |
|    |        |           | Ye                 | 2008 | 1.5 | 1.5 | 2 | 1 | 1 | 0 | 1 | 1 | 2 | 2 | 13   |
|    |        |           | Horikawa           | 2008 | 1.5 | 3   | 2 | 1 | 1 | 1 | 1 | 1 | 2 | 2 | 15.5 |
|    |        |           | Fang               | 2016 | 2   | 1.5 | 2 | 1 | 1 | 0 | 1 | 1 | 2 | 2 | 13.5 |
|    |        |           | Martin-Guerrero    | 2015 | 2   | 3   | 2 | 1 | 1 | 0 | 1 | 1 | 1 | 2 | 14   |
|    |        |           | Kim                | 2010 | 1.5 | 1.5 | 2 | 1 | 1 | 0 | 1 | 1 | 0 | 2 | 11   |

|    |        |            |                    |      |     |     |   |   |   |   |   |   |   |   |      |
|----|--------|------------|--------------------|------|-----|-----|---|---|---|---|---|---|---|---|------|
| 18 | AGO1   | rs636832   | Yang               | 2008 | 2   | 3   | 2 | 1 | 1 | 1 | 1 | 1 | 3 | 2 | 17   |
|    |        |            | Horikawa           | 2008 | 1.5 | 3   | 2 | 1 | 1 | 1 | 1 | 1 | 2 | 2 | 15.5 |
|    |        |            | Song               | 2017 | 1.5 | 1.5 | 2 | 1 | 1 | 0 | 1 | 1 | 3 | 2 | 14   |
|    |        |            | Gutierrez-Malacatt | 2016 | 2   | 1.5 | 2 | 1 | 1 | 0 | 1 | 1 | 2 | 1 | 12.5 |
|    |        |            | Martin-Guerrero    | 2015 | 2   | 3   | 2 | 1 | 1 | 0 | 1 | 1 | 1 | 2 | 14   |
|    |        |            | Kim                | 2010 | 1.5 | 1.5 | 2 | 1 | 1 | 0 | 1 | 1 | 0 | 2 | 11   |
|    |        |            | Yang               | 2008 | 2   | 3   | 2 | 1 | 1 | 1 | 1 | 1 | 3 | 2 | 17   |
| 19 | AGO2   | rs4961280  | Horikawa           | 2008 | 1.5 | 3   | 2 | 1 | 1 | 1 | 1 | 1 | 2 | 2 | 15.5 |
|    |        |            | Nikolic            | 2017 | 1.5 | 1   | 0 | 1 | 1 | 0 | 1 | 1 | 2 | 2 | 10.5 |
|    |        |            | Martin-Guerrero    | 2015 | 2   | 3   | 2 | 1 | 1 | 0 | 1 | 1 | 1 | 2 | 14   |
|    |        |            | Kim                | 2010 | 1.5 | 1.5 | 2 | 1 | 1 | 0 | 1 | 1 | 0 | 2 | 11   |
|    |        |            | Yang               | 2008 | 2   | 3   | 2 | 1 | 1 | 1 | 1 | 1 | 3 | 2 | 17   |
|    |        |            | Horikawa           | 2008 | 1.5 | 3   | 2 | 1 | 1 | 1 | 1 | 1 | 2 | 2 | 15.5 |
|    |        |            | Nikolic            | 2017 | 1.5 | 1   | 0 | 1 | 1 | 0 | 1 | 0 | 2 | 2 | 9.5  |
| 20 | TARBP2 | rs784567   | Osuch-Wojcikiewicz | 2015 | 1.5 | 1.5 | 2 | 1 | 1 | 0 | 0 | 0 | 1 | 1 | 9    |
|    |        |            | Martin-Guerrero    | 2015 | 2   | 3   | 2 | 1 | 1 | 0 | 1 | 1 | 1 | 2 | 14   |
|    |        |            | Kim                | 2010 | 1.5 | 1.5 | 2 | 1 | 1 | 0 | 1 | 0 | 0 | 2 | 10   |
|    |        |            | Yang               | 2008 | 2   | 3   | 2 | 1 | 1 | 1 | 1 | 1 | 3 | 2 | 17   |
|    |        |            | Horikawa           | 2008 | 1.5 | 3   | 2 | 1 | 1 | 1 | 1 | 1 | 2 | 2 | 15.5 |
|    |        |            | Yuan               | 2016 | 1.5 | 3   | 2 | 1 | 1 | 0 | 1 | 1 | 3 | 2 | 15.5 |
|    |        |            | Martin-Guerrero    | 2015 | 2   | 3   | 2 | 1 | 1 | 0 | 1 | 1 | 1 | 2 | 14   |
| 21 | PIWIL1 | rs1106042  | Kim                | 2010 | 1.5 | 1.5 | 2 | 1 | 1 | 0 | 1 | 1 | 0 | 2 | 11   |
|    |        |            | Yang               | 2008 | 2   | 3   | 2 | 1 | 1 | 1 | 1 | 1 | 3 | 2 | 17   |
|    |        |            | Horikawa           | 2008 | 1.5 | 3   | 2 | 1 | 1 | 1 | 1 | 1 | 1 | 2 | 14.5 |
|    |        |            | Bermisheva         | 2018 | 2   | 3   | 0 | 0 | 1 | 0 | 1 | 1 | 2 | 1 | 11   |
|    |        |            | Wang               | 2017 | 1.5 | 1.5 | 2 | 1 | 1 | 0 | 1 | 1 | 2 | 2 | 13   |
|    |        |            | Yuan               | 2016 | 1.5 | 3   | 2 | 1 | 1 | 0 | 1 | 1 | 3 | 2 | 15.5 |
|    |        |            | Liu                | 2013 | 1.5 | 3   | 2 | 1 | 1 | 0 | 1 | 1 | 3 | 2 | 15.5 |
| 22 | PIWIL1 | rs10773771 | Jiang              | 2013 | 2   | 3   | 2 | 1 | 1 | 0 | 1 | 1 | 3 | 2 | 16   |
|    |        |            | Chen               | 2013 | 2   | 3   | 2 | 1 | 1 | 0 | 1 | 1 | 3 | 2 | 16   |
|    |        |            | Ma                 | 2012 | 2   | 3   | 0 | 1 | 1 | 0 | 1 | 0 | 3 | 2 | 13   |

Columns I to X represents the 10 assessment questions in Supplementary Table S2.

Supplementary Table S4. Characteristics of the included studies.

| First author, year [Ref]                 | Cancer type                 | Country           | Cases | Controls | Genotyping Method                               | Control Source | HWE (P) | Quality score |
|------------------------------------------|-----------------------------|-------------------|-------|----------|-------------------------------------------------|----------------|---------|---------------|
| <b>DROSHA rs10719 A &gt; G</b>           |                             |                   |       |          |                                                 |                |         |               |
| Bermisheva et al. 2018 [42]              | Breast cancer               | Russia            | 413   | 361      | TaqMan OpenArray Genotyping                     | PB             | Eqi     | L             |
| Song et al. 2017 [43]                    | Gastric cancer              | China             | 628   | 502      | HRMA                                            | HB             | Eqi     | H             |
| Kim et al. 2016 [44]                     | Hepatocellular carcinoma    | South Korea       | 147   | 209      | PCR-RFLP                                        | PB             | Eqi     | H             |
| Martin-Guerrero et al. 2015 [45]         | CLL                         | Spain             | 102   | 345      | TaqMan OpenArray Genotyping                     | PB             | Eqi     | H             |
| Cho et al. 2015 [46]                     | Colorectal cancer           | South Korea       | 408   | 400      | PCR-RFLP                                        | HB             | Eqi     | H             |
| Yuan et al. 2013 [47]                    | Bladder cancer              | China             | 684   | 727      | TaqMan genotyping assay                         | HB             | Eqi     | H             |
| Jiang et al. 2013 [48]                   | Breast cancer               | China             | 847   | 878      | TaqMan OpenArray Genotyping                     | PB             | Eqi     | H             |
| Kim et al. 2010 [49]                     | Lung cancer                 | Republic of Korea | 97    | 97       | SMSG                                            | HB             | Eqi     | L             |
| Yang et al. 2008 [50]                    | Bladder cancer              | USA               | 534   | 442      | SNPlex technology                               | PB             | Diseq   | H             |
| Horikawa et al. 2008 [51]                | Renal cell carcinoma        | USA               | 252   | 246      | SNPlex technology                               | PB             | Eqi     | H             |
| <b>DROSHA rs6877842 G &gt; C</b>         |                             |                   |       |          |                                                 |                |         |               |
| Mohammadpour-Gharehbagh et al. 2020 [52] | Papillary Thyroid Carcinoma | Iran              | 120   | 130      | PCR-RFLP                                        | PB             | Eqi     | H             |
| Kim et al. 2016 [44]                     | hepatocellular carcinoma    | South Korea       | 147   | 209      | PCR-RFLP                                        | PB             | Eqi     | H             |
| Bruzgiewicz et al. 2016 [53]             | Larynx Cancer               | Poland            | 100   | 100      | TaqMan genotyping assay                         | PB             | Eqi     | L             |
| Osuch-Wojcikiewicz et al. 2015 [54]      | Larynx Cancer               | Poland            | 128   | 170      | TaqMan genotyping assay                         | HB             | Eqi     | L             |
| Martin-Guerrero et al. 2015 [45]         | CLL                         | Spain             | 102   | 341      | TaqMan OpenArray Genotyping                     | PB             | Eqi     | H             |
| Kim et al. 2010 [49]                     | Lung cancer                 | Republic of Korea | 93    | 93       | SMSG                                            | HB             | Eqi     | L             |
| Yang et al. 2008 [50]                    | Bladder cancer              | USA               | 735   | 732      | SNPlex technology                               | PB             | Eqi     | H             |
| Horikawa et al. 2008 [51]                | Renal cell carcinoma        | USA               | 275   | 278      | SNPlex technology                               | PB             | Eqi     | H             |
| <b>DGCR8 rs3757 G &gt; A</b>             |                             |                   |       |          |                                                 |                |         |               |
| Osuch-Wojcikiewicz et al. 2015 [54]      | Larynx Cancer               | Poland            | 122   | 170      | TaqMan genotyping assay                         | PB             | Diseq   | L             |
| Mi et al. 2014 [55]                      | Cervical cancer             | China             | 338   | 332      | MALDI-TOF within the MassARRAY system           | HB             | Eqi     | H             |
| Zu et al. 2013 [56]                      | Lung cancer                 | China             | 600   | 600      | TaqMan genotyping assay                         | HB             | Eqi     | L             |
| Wang et al. 2012 [57]                    | Esophageal cancer           | China             | 534   | 593      | SNaPshot assay                                  | PB             | Diseq   | H             |
| Kim et al. 2010 [49]                     | Lung cancer                 | Republic of Korea | 94    | 90       | SMSG                                            | HB             | Eqi     | L             |
| Yang et al. 2008 [50]                    | Bladder cancer              | USA               | 737   | 735      | SNPlex technology                               | HB             | Eqi     | H             |
| Horikawa et al. 2008 [51]                | Renal cell carcinoma        | USA               | 276   | 278      | SNPlex technology                               | PB             | Eqi     | H             |
| <b>DGCR8 rs417309 G &gt; A</b>           |                             |                   |       |          |                                                 |                |         |               |
| Bruzgiewicz et al. 2016 [53]             | Larynx Cancer               | Poland            | 100   | 100      | TaqMan genotyping assay                         | PB             | Eqi     | L             |
| Osuch-Wojcikiewicz et al. 2015 [54]      | Larynx Cancer               | Poland            | 112   | 170      | TaqMan genotyping assay                         | PB             | Eqi     | L             |
| Martin-Guerrero et al. 2015 [45]         | CLL                         | Spain             | 105   | 346      | TaqMan OpenArray Genotyping                     | PB             | Eqi     | H             |
| Jiang et al. 2013 [48]                   | Breast cancer               | China             | 860   | 893      | TaqMan OpenArray Genotyping                     | PB             | Eqi     | H             |
| Kim et al. 2010 [49]                     | Lung cancer                 | Republic of Korea | 98    | 97       | SMSG                                            | HB             | Eqi     | L             |
| Yang et al. 2008 [50]                    | Bladder cancer              | USA               | 740   | 738      | SNPlex technology                               | HB             | Eqi     | H             |
| Horikawa et al. 2008 [51]                | Renal cell carcinoma        | USA               | 277   | 278      | SNPlex technology                               | PB             | Eqi     | H             |
| <b>DGCR8 rs1640299 T &gt; G</b>          |                             |                   |       |          |                                                 |                |         |               |
| Bermisheva et al. 2018 [42]              | Breast cancer               | Russia            | 413   | 355      | TaqMan OpenArray Genotyping                     | PB             | Eqi     | L             |
| Bruzgiewicz et al. 2016 [53]             | Larynx Cancer               | Poland            | 100   | 100      | TaqMan genotyping assay                         | PB             | Eqi     | L             |
| Osuch-Wojcikiewicz et al. 2015 [54]      | Larynx Cancer               | Poland            | 113   | 170      | TaqMan genotyping assay                         | PB             | Diseq   | L             |
| Martin-Guerrero et al. 2015 [45]         | CLL                         | Spain             | 103   | 349      | TaqMan OpenArray Genotyping                     | PB             | Eqi     | H             |
| Jiang et al. 2013 [48]                   | Breast cancer               | China             | 849   | 891      | TaqMan OpenArray Genotyping                     | PB             | Eqi     | H             |
| Kim et al. 2010 [49]                     | Lung cancer                 | Republic of Korea | 98    | 97       | SMSG                                            | HB             | Eqi     | L             |
| Yang et al. 2008 [50]                    | Bladder cancer              | USA               | 737   | 737      | SNPlex technology                               | HB             | Eqi     | H             |
| Horikawa et al. 2008 [51]                | Renal cell carcinoma        | USA               | 277   | 278      | SNPlex technology                               | PB             | Eqi     | H             |
| <b>XPO5 rs11077 T &gt; G</b>             |                             |                   |       |          |                                                 |                |         |               |
| Mohammadpour-Gharehbagh et al. 2020 [52] | Papillary Thyroid Cancer    | Iran              | 120   | 130      | PCR-RFLP                                        | PB             | Eqi     | H             |
| Thakkar et al. 2018 [58]                 | Hodgkin lymphoma            | India             | 101   | 200      | TaqMan genotyping assay                         | PB             | Eqi     | L             |
| Huang et al. 2018 [59]                   | Cervical cancer             | China             | 296   | 296      | MALDI-TOF MS                                    | PB             | Eqi     | H             |
| Wen et al. 2017 [60]                     | Papillary Thyroid Cancer    | China             | 1134  | 1228     | TaqMan genotyping assay                         | HB             | Eqi     | H             |
| Peckham-Gregory et al. 2016 [61]         | Non-Hodgkin lymphoma        | USA               | 178   | 529      | Customized Fluidigm Dynamic 96.96 ArrayTM assay | HB             | Eqi     | H             |
| Kim et al. 2016 [44]                     | Hepatocellular Carcinoma    | South Korea       | 147   | 209      | PCR-RFLP                                        | PB             | Eqi     | H             |
| Zhao et al. 2015 [62]                    | Colorectal cancer           | China             | 163   | 142      | PCR-ligase detection reaction                   | PB             | Eqi     | L             |
| Xie et al. 2015 [63]                     | Gastric cancer              | China             | 137   | 142      | PCR-ligase detection reaction                   | PB             | Eqi     | L             |
| Osuch-Wojcikiewicz et al. 2015 [54]      | Larynx Cancer               | Poland            | 124   | 160      | TaqMan genotyping assay                         | PB             | Diseq   | L             |
| Cho et al. 2015 [46]                     | Colorectal cancer           | South Korea       | 408   | 400      | PCR-RFLP                                        | HB             | Eqi     | H             |
| Kim et al. 2010 [49]                     | Lung cancer                 | Republic of Korea | 100   | 99       | SMSG                                            | HB             | Diseq   | L             |
| Yang et al. 2008 [50]                    | Bladder cancer              | USA               | 718   | 726      | SNPlex technology                               | HB             | Eqi     | H             |

|                                          |                          |                   |      |      |                                                 |    |       |   |
|------------------------------------------|--------------------------|-------------------|------|------|-------------------------------------------------|----|-------|---|
| Horikawa et al. 2008 [51]                | Renal cell carcinoma     | USA               | 276  | 277  | SNPlex technology                               | PB | Diseq | H |
| RAN rs14035 C > T                        |                          |                   |      |      |                                                 |    |       |   |
| Wang et al. 2018 [64]                    | Neuroblastoma            | China             | 429  | 884  | TaqMan genotyping assay                         | HB | Eqi   | H |
| Huang et al. 2018 [59]                   | Cervical cancer          | China             | 295  | 296  | MALDI-TOF MS method                             | PB | Eqi   | H |
| Peckham-Gregory et al. 2016 [61]         | Non-Hodgkin lymphoma     | USA               | 180  | 529  | Customized Fluidigm Dynamic 96.96 ArrayTM assay | HB | Eqi   | H |
| Kim et al. 2016 [44]                     | Hepatocellular Carcinoma | South Korea       | 147  | 209  | PCR-RFLP                                        | PB | Eqi   | H |
| Osuch-Wojcikiewicz et al. 2015 [54]      | Larynx Cancer            | Poland            | 110  | 170  | TaqMan genotyping assay                         | PB | Diseq | L |
| Martin-Guerrero et al. 2015 [45]         | CLL                      | Spain             | 99   | 342  | TaqMan OpenArray Genotyping                     | PB | Eqi   | H |
| Cho et al. 2015 [46]                     | Colorectal cancer        | South Korea       | 408  | 400  | PCR-RFLP                                        | HB | Eqi   | H |
| Roy et al. 2014 [65]                     | Oral cancer              | India             | 439  | 438  | TaqMan genotyping assay                         | HB | Eqi   | H |
| Li et al. 2012 [66]                      | Hepatocellular Carcinoma | China             | 532  | 532  | PCR-RFLP                                        | PB | Eqi   | H |
| Kim et al. 2010 [49]                     | Lung cancer              | Republic of Korea | 93   | 90   | SMSG                                            | HB | Eqi   | L |
| Yang et al. 2008 [50]                    | Bladder cancer           | USA               | 735  | 732  | SNPlex technology                               | HB | Diseq | H |
| Horikawa et al. 2008 [51]                | Renal cell carcinoma     | USA               | 276  | 278  | SNPlex technology                               | PB | Eqi   | H |
| RAN rs3803012 A > C/A > G                |                          |                   |      |      |                                                 |    |       |   |
| Wang et al. 2017 [67]                    | Hepatocellular carcinoma | China             | 312  | 320  | TaqMan genotyping assay                         | HB | Eqi   | H |
| Liu et al. 2013 [68]                     | Hepatocellular carcinoma | China             | 1256 | 1340 | TaqMan genotyping assay                         | PB | Eqi   | H |
| Jiang et al. 2013 [48]                   | Breast cancer            | China             | 870  | 884  | TaqMan OpenArray Genotyping                     | PB | Eqi   | H |
| Chen et al. 2013 [69]                    | Cervical cancer          | China             | 1471 | 1529 | TaqMan genotyping assay                         | PB | Eqi   | H |
| Ma et al. 2012 [70]                      | Head and Neck Cancer     | China             | 391  | 892  | TaqMan genotyping assay                         | PB | Eqi   | H |
| DICER1 rs13078 A > T                     |                          |                   |      |      |                                                 |    |       |   |
| Huang et al. 2018 [59]                   | Cervical cancer          | China             | 295  | 296  | MALDI-TOF MS method                             | PB | Eqi   | H |
| Kim et al. 2016 [44]                     | Hepatocellular Carcinoma | South Korea       | 147  | 209  | PCR-RFLP                                        | PB | Eqi   | H |
| Osuch-Wojcikiewicz et al. 2015 [54]      | Larynx Cancer            | Poland            | 128  | 170  | TaqMan genotyping assay                         | PB | Diseq | L |
| Martin-Guerrero et al. 2015 [45]         | CLL                      | Spain             | 105  | 345  | TaqMan OpenArray Genotyping                     | PB | Eqi   | H |
| Yuan et al. 2013 [71]                    | Bladder cancer           | China             | 679  | 723  | TaqMan genotyping assay                         | HB | Eqi   | H |
| Jiang et al. 2013 [48]                   | Breast cancer            | China             | 864  | 892  | TaqMan OpenArray Genotyping                     | PB | Eqi   | H |
| Kim et al. 2010 [49]                     | Lung cancer              | Republic of Korea | 98   | 97   | SMSG                                            | HB | Eqi   | L |
| Yang et al. 2008 [50]                    | Bladder cancer           | USA               | 734  | 738  | SNPlex technology                               | PB | Eqi   | H |
| Horikawa et al. 2008 [51]                | Renal cell carcinoma     | USA               | 277  | 278  | SNPlex technology                               | PB | Eqi   | H |
| DICER1 rs1057035 T > C                   |                          |                   |      |      |                                                 |    |       |   |
| Wang et al. 2017 [67]                    | Hepatocellular carcinoma | China             | 312  | 320  | TaqMan genotyping assay                         | HB | Eqi   | H |
| Yuan et al. 2016 [71]                    | Head and Neck Cancer     | China             | 575  | 1548 | Illumina Infinium BeadChip platform             | PB | Eqi   | H |
| Martin-Guerrero et al. 2015 [45]         | CLL                      | Spain             | 104  | 346  | TaqMan OpenArray Genotyping                     | PB | Eqi   | H |
| Yuan et al. 2013 [47]                    | Bladder cancer           | China             | 685  | 730  | TaqMan genotyping assay                         | HB | Eqi   | H |
| Slaby et al. 2013 [72]                   | Colorectal cancer        | Czech Republic    | 198  | 203  | TaqMan genotyping assay                         | PB | Eqi   | L |
| Liu et al. 2013 [68]                     | Hepatocellular carcinoma | China             | 1275 | 1339 | TaqMan genotyping assay                         | PB | Eqi   | H |
| Jiang et al. 2013 [48]                   | Breast cancer            | China             | 848  | 881  | TaqMan OpenArray Genotyping                     | PB | Eqi   | H |
| Zu et al. 2013 [56]                      | Lung cancer              | China             | 600  | 600  | TaqMan genotyping assay                         | HB | Eqi   | L |
| Chen et al. 2013 [69]                    | Cervical cancer          | China             | 1475 | 1528 | TaqMan genotyping assay                         | PB | Eqi   | H |
| Wang et al. 2012 [57]                    | Esophageal cancer        | China             | 533  | 601  | SNaPshot assay                                  | PB | Diseq | H |
| Ma et al. 2012 [70]                      | Head and Neck Cancer     | China             | 394  | 891  | TaqMan genotyping assay                         | PB | Eqi   | H |
| DICER1 rs3742330 A > G                   |                          |                   |      |      |                                                 |    |       |   |
| Mohammadpour-Gharehbagh et al. 2020 [52] | Papillary Thyroid Cancer | Iran              | 120  | 130  | PCR-RFLP                                        | PB | Eqi   | H |
| Kim et al. 2019 [73]                     | Colorectal cancer        | South Korea       | 700  | 1400 | MassARRAY iPLEX Gold Assay                      | HB | Eqi   | H |
| Oz et al. 2018 [74]                      | Endometrial cancer       | Turkey            | 80   | 79   | TaqMan genotyping assay                         | HB | Diseq | L |
| Huang et al. 2018 [59]                   | Cervical cancer          | China             | 296  | 296  | MALDI-TOF MS method                             | PB | Diseq | H |
| Song et al. 2017 [43]                    | Gastric cancer           | China             | 628  | 502  | HRMA                                            | HB | Eqi   | H |
| Nikolic et al. 2017 [75]                 | Prostate cancer          | Serbia            | 353  | 318  | HRMA                                            | PB | Eqi   | L |
| Yuan et al. 2016 [71]                    | Head and Neck Cancer     | China             | 575  | 1551 | Illumina Infinium BeadChip platform             | PB | Eqi   | H |
| Peckham-Gregory et al. 2016 [61]         | Non-Hodgkin lymphoma     | USA               | 180  | 529  | Customized Fluidigm Dynamic 96.96 ArrayTM assay | HB | Eqi   | H |
| Kim et al. 2016 [44]                     | Hepatocellular Carcinoma | South Korea       | 147  | 209  | PCR-RFLP                                        | PB | Eqi   | H |
| Osuch-Wojcikiewicz et al. 2015 [54]      | Larynx Cancer            | Poland            | 123  | 170  | TaqMan genotyping assay                         | PB | Diseq | L |
| Cho et al. 2015 [46]                     | Colorectal cancer        | South Korea       | 408  | 400  | PCR-RFLP                                        | HB | Eqi   | H |
| Zheng et al. 2013 [76]                   | Esophageal cancer        | China             | 380  | 380  | MALDI-TOF MS method                             | PB | Eqi   | H |
| Yuan et al. 2013 [47]                    | Bladder cancer           | China             | 683  | 727  | TaqMan genotyping assay                         | HB | Eqi   | H |
| Kim et al. 2010 [49]                     | Lung cancer              | Republic of Korea | 100  | 100  | SMSG                                            | HB | Eqi   | L |
| Yang et al. 2008 [50]                    | Bladder cancer           | USA               | 727  | 724  | SNPlex technology                               | HB | Eqi   | H |
| Horikawa et al. 2008 [51]                | Renal cell carcinoma     | USA               | 277  | 278  | SNPlex technology                               | PB | Eqi   | H |
| TARBP2 rs784567 G > A                    |                          |                   |      |      |                                                 |    |       |   |
| Nikolic et al. 2017 [75]                 | Prostate cancer          | Serbia            | 355  | 318  | HRMA                                            | PB | Diseq | L |



|                                     |                      |                   |      |      |                                                                        |    |       |   |
|-------------------------------------|----------------------|-------------------|------|------|------------------------------------------------------------------------|----|-------|---|
| Osuch-Wojcikiewicz et al. 2015 [54] | Larynx Cancer        | Poland            | 128  | 170  | TaqMan genotyping assay                                                | PB | Diseq | L |
| Martin-Guerrero et al. 2015 [45]    | CLL                  | Spain             | 97   | 338  | TaqMan OpenArray Genotyping                                            | PB | Eqi   | H |
| Kim et al. 2010 [49]                | Lung cancer          | Republic of Korea | 98   | 97   | SMSG                                                                   | HB | Diseq | L |
| Yang et al. 2008 [50]               | Bladder cancer       | USA               | 737  | 729  | SNPlex technology                                                      | HB | Eqi   | H |
| Horikawa et al. 2008 [51]           | Renal cell carcinoma | USA               | 276  | 277  | SNPlex technology                                                      | PB | Eqi   | H |
| AGO1 rs595961 A > G                 |                      |                   |      |      |                                                                        |    |       |   |
| Fang et al. 2016 [77]               | Lung cancer          | China             | 473  | 395  | TaqMan genotyping assay                                                | HB | Eqi   | H |
| Martin-Guerrero et al. 2015 [78]    | CLL                  | Spain             | 103  | 339  | TaqMan OpenArray Genotyping                                            | PB | Eqi   | H |
| Kim et al. 2010 [49]                | Lung cancer          | Republic of Korea | 98   | 97   | SMSG                                                                   | HB | Eqi   | L |
| Yang et al. 2008 [50]               | Bladder cancer       | USA               | 740  | 741  | SNPlex technology                                                      | HB | Eqi   | H |
| Horikawa et al. 2008 [51]           | Renal cell carcinoma | USA               | 277  | 281  | SNPlex technology                                                      | PB | Eqi   | H |
| AGO1 rs636832 G > A                 |                      |                   |      |      |                                                                        |    |       |   |
| Song et al. 2017 [43]               | Gastric cancer       | China             | 628  | 502  | HRMA                                                                   | HB | Eqi   | H |
| Gutiérrez-Malacatt et al. 2016 [78] | CML                  | Mexico            | 312  | 469  | TaqMan genotyping assay                                                | HB | Eqi   | H |
| Martin-Guerrero et al. 2015 [45]    | CLL                  | Spain             | 105  | 347  | TaqMan OpenArray Genotyping                                            | PB | Eqi   | H |
| Kim et al. 2010 [49]                | Lung cancer          | Republic of Korea | 98   | 97   | Melting-curve analysis using fluorescence-labeled hybridization probes | HB | Eqi   | L |
| Yang et al. 2008 [50]               | Bladder cancer       | USA               | 738  | 736  | SNPlex technology                                                      | HB | Eqi   | H |
| Horikawa et al. 2008 [51]           | Renal cell carcinoma | USA               | 277  | 277  | SNPlex technology                                                      | PB | Eqi   | H |
| AGO2 rs4961280 C > A                |                      |                   |      |      |                                                                        |    |       |   |
| Nikolic et al. 2017 [75]            | Prostate cancer      | Serbia            | 355  | 318  | TaqMan genotyping assay                                                | PB | Eqi   | L |
| Martin-Guerrero et al. 2015 [45]    | CLL                  | Spain             | 106  | 349  | TaqMan OpenArray Genotyping                                            | PB | Eqi   | H |
| Kim et al. 2010 [49]                | Lung cancer          | Republic of Korea | 99   | 97   | SMSG                                                                   | HB | Eqi   | L |
| Yang et al. 2008 [50]               | Bladder cancer       | USA               | 729  | 725  | SNPlex technology                                                      | HB | Eqi   | H |
| Horikawa et al. 2008 [51]           | Renal cell carcinoma | USA               | 276  | 277  | SNPlex technology                                                      | PB | Eqi   | H |
| GEMIN3 (DDX20) rs197412 T > C       |                      |                   |      |      |                                                                        |    |       |   |
| Peckham-Gregory et al. 2016 [61]    | Non-Hodgkin lymphoma | USA               | 180  | 529  | Customized Fluidigm Dynamic 96.96 ArrayTM assay                        | HB | Eqi   | H |
| Yuan et al. 2016 [71]               | Head and Neck Cancer | China             | 575  | 1550 | Illumina Infinium BeadChip platform                                    | PB | Eqi   | H |
| Martin-Guerrero et al. 2015 [45]    | CLL                  | Spain             | 101  | 344  | TaqMan OpenArray Genotyping                                            | PB | Eqi   | H |
| Roy et al. 2014 [79]                | Oral cancer          | India             | 450  | 447  | TaqMan genotyping assay                                                | HB | Eqi   | H |
| Roy et al. 2014 [79]                | Oral cancer          | India             | 298  | 447  | TaqMan genotyping assay                                                | HB | Eqi   | L |
| Jiang et al. 2013 [48]              | Breast cancer        | China             | 853  | 886  | TaqMan OpenArray Genotyping                                            | PB | Eqi   | H |
| Kim et al. 2010 [49]                | Lung cancer          | Republic of Korea | 92   | 90   | SMSG                                                                   | HB | Eqi   | L |
| Yang et al. 2008 [50]               | Bladder cancer       | USA               | 735  | 730  | SNPlex technology                                                      | HB | Diseq | H |
| Horikawa et al. 2008 [51]           | Renal cell carcinoma | USA               | 277  | 278  | SNPlex technology                                                      | PB | Eqi   | H |
| GEMIN3 (DDX20) rs197414 C > A       |                      |                   |      |      |                                                                        |    |       |   |
| Nikolic et al. 2017 [75]            | Prostate cancer      | Serbia            | 353  | 319  | PCR-RFLP                                                               | HB | Eqi   | L |
| Martin-Guerrero et al. 2015 [45]    | CLL                  | Spain             | 95   | 321  | TaqMan OpenArray Genotyping                                            | PB | Eqi   | H |
| Kim et al. 2010 [49]                | Lung cancer          | Republic of Korea | 100  | 99   | SMSG                                                                   | HB | Diseq | L |
| Yang et al. 2008 [50]               | Bladder cancer       | USA               | 740  | 742  | SNPlex technology                                                      | HB | Eqi   | H |
| Horikawa et al. 2008 [51]           | Renal cell carcinoma | USA               | 278  | 278  | SNPlex technology                                                      | PB | Eqi   | H |
| GEMIN4 rs7813 G > A                 |                      |                   |      |      |                                                                        |    |       |   |
| Verma et al. 2019 [80]              | Renal cell carcinoma | India             | 100  | 225  | TaqMan genotyping assay                                                | PB | Eqi   | H |
| Song et al. 2017 [43]               | Gastric cancer       | China             | 628  | 502  | HRMA                                                                   | HB | Eqi   | H |
| Nikolic et al. 2017 [75]            | Prostate cancer      | Serbia            | 355  | 319  | TaqMan genotyping assay                                                | PB | Eqi   | L |
| Peckham-Gregory et al. 2016 [61]    | Non-Hodgkin lymphoma | USA               | 180  | 527  | Customized Fluidigm Dynamic 96.96 ArrayTM assay                        | HB | Eqi   | H |
| Fang et al. 2016 [77]               | Lung cancer          | China             | 473  | 395  | TaqMan genotyping assay                                                | HB | Eqi   | H |
| Zhang et al. 2014 [81]              | Prostate cancer      | China             | 348  | 70   | HRMA                                                                   | PB | Diseq | L |
| Qu et al. 2014 [82]                 | Esophageal cancer    | China             | 381  | 426  | PCR-RFLP                                                               | PB | Eqi   | H |
| Jiang et al. 2013 [48]              | Breast cancer        | China             | 866  | 885  | TaqMan OpenArray Genotyping                                            | PB | Eqi   | H |
| Liu et al. 2012 [83]                | Prostate cancer      | China             | 300  | 244  | HRMA                                                                   | HB | Eqi   | H |
| Sung et al. 2011 [84]               | Breast cancer        | Korea             | 559  | 566  | TaqMan genotyping assay                                                | HB | Eqi   | H |
| Kim et al. 2010 [49]                | Lung cancer          | Republic of Korea | 98   | 99   | SMSG                                                                   | HB | Eqi   | L |
| Yang et al. 2008 [50]               | Bladder cancer       | USA               | 736  | 736  | SNPlex technology                                                      | HB | Eqi   | H |
| Ye et al. 2008 [85]                 | Esophageal cancer    | USA               | 346  | 346  | SNPlex technology                                                      | HB | Eqi   | H |
| Horikawa et al. 2008 [51]           | Renal cell carcinoma | USA               | 277  | 278  | SNPlex technology                                                      | PB | Eqi   | H |
| GEMIN4 rs2740348 G > C              |                      |                   |      |      |                                                                        |    |       |   |
| Bermisheva et al. 2018 [42]         | Breast cancer        | Russia            | 415  | 359  | TaqMan OpenArray Genotyping                                            | PB | Eqi   | L |
| Peckham-Gregory et al. 2016 [61]    | Non-Hodgkin lymphoma | USA               | 180  | 528  | Customized Fluidigm Dynamic 96.96 ArrayTM assay                        | HB | Eqi   | H |
| Mullany et al. 2016 [86]            | Colorectal cancer    | USA               | 1115 | 1173 | Illumina HumanHap 550, 610 K arrays                                    | PB | Eqi   | H |
| Gutiérrez-Malacatt et al. 2016 [78] | CML                  | Mexico            | 312  | 469  | TaqMan genotyping assay                                                | HB | Eqi   | H |
| Martin-Guerrero et al. 2015 [45]    | CLL                  | Spain             | 105  | 345  | TaqMan OpenArray Genotyping                                            | PB | Eqi   | H |
| Jiang et al. 2013 [48]              | Breast cancer        | China             | 863  | 888  | TaqMan OpenArray Genotyping                                            | PB | Eqi   | H |
| Liu et al. 2012 [83]                | Prostate cancer      | China             | 300  | 244  | HRMA                                                                   | HB | Diseq | L |

|                                  |                          |                   |      |      |                             |    |       |   |
|----------------------------------|--------------------------|-------------------|------|------|-----------------------------|----|-------|---|
| Kim et al. 2010 [49]             | Lung cancer              | Republic of Korea | 92   | 90   | SMSG                        | HB | Eqi   | L |
| Yang et al. 2008 [50]            | Bladder cancer           | USA               | 738  | 739  | SNPlex technology           | HB | Eqi   | H |
| Ye et al. 2008 [85]              | Esophageal cancer        | USA               | 346  | 346  | SNPlex technology           | HB | Eqi   | H |
| Horikawa et al. 2008 [51]        | Renal cell carcinoma     | USA               | 276  | 278  | SNPlex technology           | PB | Eqi   | H |
| GEMIN4 rs3744741 C > T           |                          |                   |      |      |                             |    |       |   |
| Verma et al. 2019 [80]           | Renal cell carcinoma     | India             | 100  | 225  | TaqMan genotyping assay     | PB | Eqi   | H |
| Martin-Guerrero et al. 2015 [45] | CLL                      | Spain             | 106  | 347  | TaqMan OpenArray Genotyping | PB | Eqi   | H |
| Jiang et al. 2013 [48]           | Breast cancer            | China             | 862  | 887  | TaqMan OpenArray Genotyping | PB | Eqi   | H |
| Liu et al. 2012 [83]             | Prostate cancer          | China             | 300  | 244  | HRMA                        | HB | Eqi   | H |
| Sung et al. 2011 [84]            | Breast cancer            | Korea             | 559  | 567  | TaqMan genotyping assay     | HB | Eqi   | H |
| Kim et al. 2010 [49]             | Lung cancer              | Republic of Korea | 100  | 99   | SMSG                        | HB | Eqi   | L |
| Yang et al. 2008 [50]            | Bladder cancer           | USA               | 742  | 740  | SNPlex technology           | HB | Eqi   | H |
| Ye et al. 2008 [85]              | Esophageal cancer        | USA               | 346  | 346  | SNPlex technology           | HB | Eqi   | H |
| Horikawa et al. 2008 [51]        | Renal cell carcinoma     | USA               | 277  | 277  | SNPlex technology           | PB | Eqi   | H |
| PIWIL1 rs1106042 G > A           |                          |                   |      |      |                             |    |       |   |
| Yuan et al. 2016 [71]            | Head and Neck Cancer     | China             | 575  | 1551 | Illumina Infinium BeadChip  | PB | Eqi   | H |
| Martin-Guerrero et al. 2015 [45] | CLL                      | Spain             | 104  | 343  | TaqMan OpenArray Genotyping | PB | Eqi   | H |
| Kim et al. 2010 [49]             | Lung cancer              | Republic of Korea | 97   | 97   | SMSG                        | HB | Eqi   | L |
| Yang et al. 2008 [50]            | Bladder cancer           | USA               | 708  | 691  | SNPlex technology           | HB | Eqi   | H |
| Horikawa et al. 2008 [51]        | Renal cell carcinoma     | USA               | 263  | 235  | SNPlex technology           | PB | Eqi   | H |
| PIWIL1 rs10773771 C > T          |                          |                   |      |      |                             |    |       |   |
| Bermisheva et al. 2018 [42]      | Breast cancer            | Russia            | 403  | 350  | TaqMan OpenArray Genotyping | PB | Eqi   | L |
| Wang et al. 2017 [67]            | Hepatocellular carcinoma | China             | 312  | 320  | TaqMan genotyping assay     | HB | Eqi   | H |
| Yuan et al. 2016 [71]            | Head and Neck Cancer     | China             | 575  | 1550 | Illumina Infinium BeadChip  | PB | Eqi   | H |
| Liu et al. 2013 [68]             | Hepatocellular carcinoma | China             | 1285 | 1334 | TaqMan genotyping assay     | PB | Eqi   | H |
| Jiang et al. 2013 [48]           | Breast cancer            | China             | 854  | 876  | TaqMan OpenArray Genotyping | PB | Eqi   | H |
| Chen et al. 2013 [69]            | Cervical cancer          | China             | 1469 | 1526 | TaqMan genotyping assay     | PB | Eqi   | H |
| Ma et al. 2012 [70]              | Head and Neck Cancer     | China             | 392  | 892  | TaqMan genotyping assay     | PB | Diseq | H |

HRMA : High resolution melting analysis, SMSG: Sequenome mass spectrometry-based genotyping assay, PCR-RFLP : polymerase chain reaction-restriction fragment length polymorphism, PB : population-based, HB : hospital-based, Eqi : Hardy-Weinberg equilibrium, Diseq : Hardy-Weinberg disequilibrium, H : high quality score, L : low quality score; CLL : Chronic lymphocytic leukemia; CML : Chronic Myeloid Leukemia

Supplementary Table S5. Distribution of samples according to the type of cancer.

| Gene/SNP          | UB   | Breast | Cervical | CLL | CML | CRC  | Uterus | Esophagus | Gastric | H&N  | HCC  | HL  | Larynx | Lung | NB   | NHL | Oral | PTC  | Prostate | RCC |
|-------------------|------|--------|----------|-----|-----|------|--------|-----------|---------|------|------|-----|--------|------|------|-----|------|------|----------|-----|
| AGO1 rs595961     | 1481 |        |          | 442 |     |      |        |           |         |      |      |     |        | 1063 |      |     |      |      |          | 558 |
| AGO1 rs636832     | 1474 |        |          | 452 | 781 |      |        |           | 1130    |      |      |     |        | 195  |      |     |      |      |          | 554 |
| AGO2 rs4961280    | 1454 |        |          | 455 |     |      |        |           |         |      |      |     |        | 196  |      |     |      |      | 673      | 553 |
| DGCR8 rs1640299   | 1474 | 2508   |          | 452 |     |      |        |           |         |      |      |     | 483    | 195  |      |     |      |      |          | 555 |
| DGCR8 rs3757      | 1472 |        | 670      |     |     |      |        | 1127      |         |      |      |     |        | 292  | 1384 |     |      |      |          | 554 |
| DGCR8 rs417309    | 1478 | 1753   |          | 451 |     |      |        |           |         |      |      |     | 482    | 195  |      |     |      |      |          | 555 |
| DICER1 rs1057035  | 1415 | 1729   | 3003     | 450 |     | 401  |        | 1134      |         | 3408 | 3246 |     |        | 1200 |      |     |      |      |          |     |
| DICER1 rs13078    | 2874 | 1756   | 591      | 450 |     |      |        |           |         |      | 356  |     | 298    | 195  |      |     |      |      |          | 555 |
| DICER1 rs3742330  | 2861 |        | 592      |     |     | 2908 | 159    | 760       | 1130    | 2126 | 356  |     | 293    | 200  |      | 709 |      | 250  | 671      | 555 |
| DROSHA rs10719    | 2387 | 2499   |          | 447 |     | 808  |        |           | 1130    |      | 356  |     |        | 194  |      |     |      |      |          | 498 |
| DROSHA rs6877842  | 1467 |        |          | 443 |     |      |        |           |         |      | 356  |     | 498    | 186  |      |     |      | 250  |          | 553 |
| GEMIN3 rs197412   | 1465 | 1739   |          | 445 |     |      |        |           |         | 2125 |      |     |        | 182  |      | 709 | 1642 |      |          | 555 |
| GEMIN3 rs197414   | 1482 |        |          | 416 |     |      |        |           |         |      |      |     |        | 199  |      |     |      |      | 672      | 556 |
| GEMIN4 rs2740348  | 1477 | 2525   |          | 450 | 781 | 2288 |        | 692       |         |      |      |     |        | 182  |      | 708 |      |      | 544      | 554 |
| GEMIN4 rs3744741  | 1482 | 2875   |          | 453 |     |      |        | 692       |         |      |      |     |        | 199  |      |     |      |      | 544      | 879 |
| GEMIN4 rs7813     | 1472 | 2876   |          |     |     |      |        | 1499      | 1130    |      |      |     |        | 1065 |      | 707 |      |      | 1636     | 880 |
| PIWIL1 rs10773771 |      | 2483   | 2995     |     |     |      |        |           |         | 3409 | 3251 |     |        |      |      |     |      |      |          |     |
| PIWIL1 rs1106042  | 1399 |        |          | 447 |     |      |        |           |         | 2126 |      |     |        | 194  |      |     |      |      |          | 498 |
| RAN rs14035       | 1467 |        | 591      | 441 |     | 808  |        |           |         |      | 1420 |     | 280    | 183  | 1313 | 709 | 877  |      |          | 554 |
| RAN rs3803012     |      | 1754   | 3000     |     |     |      |        |           |         | 1283 | 3228 |     |        |      |      |     |      |      |          |     |
| TARBP2 rs784567   | 1466 |        |          | 435 |     |      |        |           |         |      |      |     | 298    | 195  |      |     |      |      | 673      | 553 |
| XPO5 rs11077      | 1444 |        | 592      |     |     | 1113 |        |           | 279     |      | 356  | 301 | 284    | 199  |      | 707 |      | 2612 |          | 553 |

CLL: chronic lymphocytic leukemia, CRC: colorectal cancer, CML: chronic myeloid leukemia, H&N: head and neck, HCC: hepatocellular carcinoma, HL: Hodgkin lymphoma, NB: neuroblastoma, NHL: non-Hodgkin lymphoma, PTC: papillary thyroid cancer, RCC: renal cell cancer.

Supplementary Table S6. Meta-analysis of the association between **DROSHA (A > G; rs10719)** variant and cancer risk.

| Comparison                                  | Subgroups            | No. of studies | Sample size |         | Test of association |             |         |       | Test of heterogeneity |         |                    | Publication bias  |
|---------------------------------------------|----------------------|----------------|-------------|---------|---------------------|-------------|---------|-------|-----------------------|---------|--------------------|-------------------|
|                                             |                      |                | Cancer      | Control | OR                  | 95% CI      | P-value | Model | Q test                | P-value | I <sup>2</sup> (%) | P-value (Egger's) |
| Allelic model<br>(G allele versus A allele) | Overall              | 10             | 8224        | 8414    | 1.032               | 0.958-1.113 | 0.406   | R     | 18.93                 | 0.026   | 52.45              | 0.179             |
|                                             | Geographical region  |                |             |         |                     |             |         |       |                       |         |                    |                   |
|                                             | Asian                | 6              | 5622        | 5626    | 1.062               | 0.978-1.154 | 0.154   | F     | 4.806                 | 0.440   | 0.0                | 0.342             |
|                                             | European             | 2              | 1030        | 1412    | 0.972               | 0.466-2.025 | 0.939   | R     | 10.20                 | 0.001   | 90.19              | NA                |
|                                             | American             | 2              | 1572        | 1376    | 0.906               | 0.756-1.085 | 0.281   | F     | 0.420                 | 0.517   | 0.0                | NA                |
|                                             | Cancer type          |                |             |         |                     |             |         |       |                       |         |                    |                   |
|                                             | Bladder cancer       | 2              | 2436        | 2338    | 1.039               | 0.740-1.460 | 0.824   | R     | 5.889                 | 0.015   | 83.02              | NA                |
|                                             | Breast cancer        | 2              | 2520        | 2478    | 1.198               | 0.927-1.549 | 0.167   | R     | 3.573                 | 0.059   | 72.01              | NA                |
|                                             | CLL                  | 1              | 204         | 690     | 0.655               | 0.440-0.977 | 0.038   | F     | 0.0                   | 1.0     | 0.0                | NA                |
|                                             | Colorectal cancer    | 1              | 816         | 800     | 0.999               | 0.800-1.247 | 0.991   | F     | 0.0                   | 1.0     | 0.0                | NA                |
|                                             | Gastric cancer       | 1              | 1256        | 1004    | 0.970               | 0.809-1.163 | 0.741   | F     | 0.0                   | 1.0     | 0.0                | NA                |
|                                             | HCC                  | 1              | 294         | 418     | 1.029               | 0.734-1.442 | 0.869   | F     | 0.0                   | 1.0     | 0.0                | NA                |
|                                             | Lung Cancer          | 1              | 194         | 194     | 0.873               | 0.553-1.379 | 0.561   | F     | 0.0                   | 1.0     | 0.0                | NA                |
|                                             | Renal cell carcinoma | 1              | 504         | 492     | 0.981               | 0.725-1.329 | 0.904   | F     | 0.0                   | 1.0     | 0.0                | NA                |
|                                             | Genotyping method    |                |             |         |                     |             |         |       |                       |         |                    |                   |
|                                             | TaqMan PCR           | 4              | 4092        | 4622    | 1.100               | 0.892-1.356 | 0.373   | R     | 11.70                 | 0.008   | 74.36              | 0.531             |
|                                             | RFLP-PCR             | 2              | 1110        | 1218    | 1.008               | 0.837-1.213 | 0.935   | F     | 0.021                 | 0.885   | 0.0                | NA                |
|                                             | SNPlex technology    | 2              | 1572        | 1376    | 0.906               | 0.756-1.085 | 0.281   | F     | 0.420                 | 0.517   | 0.0                | NA                |
|                                             | Other methods        | 2              | 1450        | 1198    | 0.956               | 0.808-1.132 | 0.601   | F     | 0.176                 | 0.675   | 0.0                | NA                |
|                                             | Source of controls   |                |             |         |                     |             |         |       |                       |         |                    |                   |
|                                             | Population-based     | 6              | 4590        | 4962    | 1.002               | 0.843-1.192 | 0.978   | R     | 14.01                 | 0.016   | 64.30              | 0.413             |
|                                             | Hospital-based       | 4              | 3634        | 3452    | 1.064               | 0.958-1.181 | 0.249   | F     | 4.769                 | 0.190   | 37.09              | 0.443             |
|                                             | HWE in controls      |                |             |         |                     |             |         |       |                       |         |                    |                   |
|                                             | Equilibrium          | 9              | 7156        | 7530    | 1.048               | 0.936-1.173 | 0.414   | R     | 15.88                 | 0.044   | 49.63              | 0.192             |
|                                             | Disequilibrium       | 1              | 1068        | 884     | 0.866               | 0.692-1.084 | 0.210   | F     | 0.0                   | 1.0     | 0.0                | NA                |
|                                             | Quality score        |                |             |         |                     |             |         |       |                       |         |                    |                   |
|                                             | High quality         | 8              | 7204        | 7498    | 1.001               | 0.902-1.111 | 0.985   | R     | 12.08                 | 0.098   | 42.05              | 0.089             |
|                                             | Low quality          | 2              | 1020        | 916     | 1.150               | 0.736-1.797 | 0.539   | R     | 3.159                 | 0.076   | 68.34              | NA                |
| Recessive model<br>(GG versus AA+AG)        | Overall              | 10             | 4112        | 4207    | 1.192               | 1.005-1.414 | 0.043   | F     | 10.40                 | 0.319   | 13.49              | 0.835             |
|                                             | Geographical region  |                |             |         |                     |             |         |       |                       |         |                    |                   |
|                                             | Asian                | 6              | 2811        | 2813    | 1.223               | 1.001-1.494 | 0.049   | F     | 3.975                 | 0.553   | 0.0                | 0.331             |
|                                             | European             | 2              | 515         | 706     | 1.589               | 0.991-2.547 | 0.054   | F     | 1.325                 | 0.250   | 24.55              | NA                |
|                                             | American             | 2              | 786         | 688     | 0.809               | 0.517-1.268 | 0.356   | F     | 0.761                 | 0.383   | 0.0                | NA                |
|                                             | Cancer type          |                |             |         |                     |             |         |       |                       |         |                    |                   |
|                                             | Bladder cancer       | 2              | 1218        | 1169    | 1.048               | 0.488-2.251 | 0.905   | R     | 4.629                 | 0.031   | 78.40              | NA                |
|                                             | Breast cancer        | 2              | 1260        | 1239    | 1.330               | 0.988-1.789 | 0.060   | F     | 2.057                 | 0.151   | 51.39              | NA                |
|                                             | CLL                  | 1              | 102         | 345     | 0.936               | 0.339-2.588 | 0.899   | F     | 0.0                   | 1.0     | 0.0                | NA                |
|                                             | Colorectal cancer    | 1              | 408         | 400     | 1.432               | 0.806-2.547 | 0.221   | F     | 0.0                   | 1.0     | 0.0                | NA                |
|                                             | Gastric cancer       | 1              | 628         | 502     | 0.923               | 0.618-1.378 | 0.695   | F     | 0.0                   | 1.0     | 0.0                | NA                |
|                                             | HCC                  | 1              | 147         | 209     | 1.746               | 0.760-4.014 | 0.189   | F     | 0.0                   | 1.0     | 0.0                | NA                |
|                                             | Lung Cancer          | 1              | 97          | 97      | 1.315               | 0.469-3.685 | 0.603   | F     | 0.0                   | 1.0     | 0.0                | NA                |
|                                             | Renal cell carcinoma | 1              | 252         | 246     | 1.044               | 0.504-2.161 | 0.907   | F     | 0.0                   | 1.0     | 0.0                | NA                |
|                                             | Genotyping method    |                |             |         |                     |             |         |       |                       |         |                    |                   |
|                                             | TaqMan PCR           | 4              | 2046        | 2311    | 1.357               | 1.071-1.720 | 0.011   | F     | 2.835                 | 0.418   | 0.0                | 0.982             |
|                                             | RFLP-PCR             | 2              | 555         | 609     | 1.527               | 0.951-2.452 | 0.080   | F     | 0.147                 | 0.701   | 0.0                | NA                |
|                                             | SNPlex technology    | 2              | 786         | 688     | 0.809               | 0.517-1.268 | 0.356   | F     | 0.761                 | 0.383   | 0.0                | NA                |
|                                             | Other methods        | 2              | 725         | 599     | 0.967               | 0.665-1.405 | 0.860   | F     | 0.394                 | 0.530   | 0.0                | NA                |
|                                             | Source of controls   |                |             |         |                     |             |         |       |                       |         |                    |                   |
|                                             | Population-based     | 6              | 2295        | 2481    | 1.169               | 0.928-1.473 | 0.186   | F     | 7.189                 | 0.207   | 30.45              | 0.987             |
|                                             | Hospital-based       | 4              | 1817        | 1726    | 1.220               | 0.948-1.571 | 0.122   | F     | 3.154                 | 0.369   | 4.877              | 0.713             |
|                                             | HWE in controls      |                |             |         |                     |             |         |       |                       |         |                    |                   |
|                                             | Equilibrium          | 9              | 3578        | 3765    | 1.257               | 1.052-1.503 | 0.012   | F     | 6.572                 | 0.583   | 0.0                | 0.644             |
|                                             | Disequilibrium       | 1              | 534         | 442     | 0.692               | 0.391-1.225 | 0.206   | F     | 0.0                   | 1.0     | 0.0                | NA                |
|                                             | Quality score        |                |             |         |                     |             |         |       |                       |         |                    |                   |
|                                             | High quality         | 8              | 3602        | 3749    | 1.129               | 0.941-1.356 | 0.192   | F     | 7.499                 | 0.379   | 6.656              | 0.978             |
|                                             | Low quality          | 2              | 510         | 458     | 1.712               | 1.067-2.748 | 0.026   | F     | 0.320                 | 0.572   | 0.0                | NA                |
| Dominant model<br>(AG+GG versus AA)         | Overall              | 10             | 4112        | 4207    | 1.006               | 0.911-1.112 | 0.901   | R     | 17.76                 | 0.038   | 49.32              | 0.064             |
|                                             | Geographical region  |                |             |         |                     |             |         |       |                       |         |                    |                   |
|                                             | Asian                | 6              | 2811        | 2813    | 1.041               | 0.938-1.157 | 0.449   | F     | 5.588                 | 0.348   | 10.52              | 0.105             |
|                                             | European             | 2              | 515         | 706     | 0.895               | 0.364-2.198 | 0.809   | R     | 10.61                 | 0.001   | 90.57              | NA                |
|                                             | American             | 2              | 786         | 688     | 0.912               | 0.736-1.131 | 0.401   | F     | 0.130                 | 0.719   | 0.0                | NA                |
|                                             | Cancer type          |                |             |         |                     |             |         |       |                       |         |                    |                   |
|                                             | Bladder cancer       | 2              | 1218        | 1169    | 1.059               | 0.762-1.472 | 0.731   | R     | 3.788                 | 0.052   | 73.60              | NA                |
|                                             | Breast cancer        | 2              | 1260        | 1239    | 1.156               | 0.987-1.353 | 0.072   | F     | 2.267                 | 0.132   | 55.88              | NA                |
|                                             | CLL                  | 1              | 102         | 345     | 0.554               | 0.346-0.889 | 0.014   | F     | 0.0                   | 1.0     | 0.0                | NA                |
|                                             | Colorectal cancer    | 1              | 408         | 400     | 0.917               | 0.695-1.209 | 0.540   | F     | 0.0                   | 1.0     | 0.0                | NA                |
|                                             | Gastric cancer       | 1              | 628         | 502     | 0.976               | 0.772-1.235 | 0.842   | F     | 0.0                   | 1.0     | 0.0                | NA                |
|                                             | HCC                  | 1              | 147         | 209     | 0.905               | 0.593-1.383 | 0.645   | F     | 0.0                   | 1.0     | 0.0                | NA                |

|                                      |                             |    |      |      |              |                    |              |   |       |       |       |       |
|--------------------------------------|-----------------------------|----|------|------|--------------|--------------------|--------------|---|-------|-------|-------|-------|
|                                      | <i>Lung Cancer</i>          | 1  | 97   | 97   | 0.744        | 0.421-1.317        | 0.310        | F | 0.0   | 1.0   | 0.0   | NA    |
|                                      | <i>Renal cell carcinoma</i> | 1  | 252  | 246  | 0.963        | 0.668-1.387        | 0.838        | F | 0.0   | 1.0   | 0.0   | NA    |
|                                      | Genotyping method           |    |      |      |              |                    |              |   |       |       |       |       |
|                                      | <i>TaqMan PCR</i>           | 4  | 2046 | 2311 | 1.068        | 0.822-1.388        | 0.621        | R | 11.83 | 0.008 | 74.64 | 0.419 |
|                                      | <i>RFLP-PCR</i>             | 2  | 555  | 609  | 0.914        | 0.725-1.152        | 0.444        | F | 0.002 | 0.960 | 0.0   | NA    |
|                                      | <i>SNPlex technology</i>    | 2  | 786  | 688  | 0.912        | 0.736-1.131        | 0.401        | F | 0.130 | 0.719 | 0.0   | NA    |
|                                      | <i>Other methods</i>        | 2  | 725  | 599  | 0.939        | 0.756-1.166        | 0.568        | F | 0.744 | 0.388 | 0.0   | NA    |
|                                      | Source of controls          |    |      |      |              |                    |              |   |       |       |       |       |
|                                      | <i>Population-based</i>     | 6  | 2295 | 2481 | 0.968        | 0.792-1.184        | 0.752        | R | 12.52 | 0.028 | 60.05 | 0.275 |
|                                      | <i>Hospital-based</i>       | 4  | 1817 | 1726 | 1.043        | 0.914-1.191        | 0.529        | F | 5.105 | 0.164 | 41.23 | 0.258 |
|                                      | HWE in controls             |    |      |      |              |                    |              |   |       |       |       |       |
|                                      | <i>Equilibrium</i>          | 9  | 3578 | 3765 | 1.005        | 0.871-1.160        | 0.945        | R | 16.48 | 0.036 | 51.47 | 0.071 |
|                                      | <i>Disequilibrium</i>       | 1  | 534  | 442  | 0.886        | 0.679-1.156        | 0.373        | F | 0.0   | 1.0   | 0.0   | NA    |
|                                      | Quality score               |    |      |      |              |                    |              |   |       |       |       |       |
|                                      | <i>High quality</i>         | 8  | 3602 | 3749 | 1.000        | 0.910-1.098        | 0.993        | F | 11.95 | 0.102 | 41.45 | 0.029 |
|                                      | <i>Low quality</i>          | 2  | 510  | 458  | 1.069        | 0.585-1.953        | 0.827        | R | 3.664 | 0.056 | 72.70 | NA    |
| Homozygote model<br>(GG versus AA)   | Overall                     | 10 | 2589 | 2619 | <b>1.195</b> | <b>1.004-1.424</b> | <b>0.046</b> | F | 12.28 | 0.198 | 26.69 | 0.809 |
|                                      | Geographical region         |    |      |      |              |                    |              |   |       |       |       |       |
|                                      | <i>Asian</i>                | 6  | 1694 | 1686 | <b>1.229</b> | <b>1.000-1.510</b> | <b>0.050</b> | F | 4.002 | 0.549 | 0.0   | 0.636 |
|                                      | <i>European</i>             | 2  | 335  | 450  | 1.365        | 0.531-3.506        | 0.518        | R | 2.745 | 0.100 | 63.57 | NA    |
|                                      | <i>American</i>             | 2  | 560  | 483  | 0.793        | 0.503-1.249        | 0.317        | F | 0.761 | 0.383 | 0.0   | NA    |
|                                      | Cancer type                 |    |      |      |              |                    |              |   |       |       |       |       |
|                                      | <i>Bladder cancer</i>       | 2  | 789  | 765  | 1.071        | 0.455-2.524        | 0.875        | R | 5.630 | 0.018 | 82.24 | NA    |
|                                      | <i>Breast cancer</i>        | 2  | 760  | 764  | <b>1.390</b> | <b>1.024-1.886</b> | <b>0.034</b> | F | 2.616 | 0.106 | 61.77 | NA    |
|                                      | <i>CLL</i>                  | 1  | 76   | 211  | 0.755        | 0.270-2.110        | 0.592        | F | 0.0   | 1.0   | 0.0   | NA    |
|                                      | <i>Colorectal cancer</i>    | 1  | 254  | 232  | 1.346        | 0.747-2.424        | 0.323        | F | 0.0   | 1.0   | 0.0   | NA    |
|                                      | <i>Gastric cancer</i>       | 1  | 371  | 297  | 0.919        | 0.606-1.393        | 0.690        | F | 0.0   | 1.0   | 0.0   | NA    |
|                                      | <i>HCC</i>                  | 1  | 94   | 121  | 1.605        | 0.684-3.765        | 0.277        | F | 0.0   | 1.0   | 0.0   | NA    |
|                                      | <i>Lung Cancer</i>          | 1  | 68   | 59   | 1.133        | 0.394-3.257        | 0.816        | F | 0.0   | 1.0   | 0.0   | NA    |
|                                      | <i>Renal cell carcinoma</i> | 1  | 177  | 170  | 1.027        | 0.491-2.148        | 0.944        | F | 0.0   | 1.0   | 0.0   | NA    |
|                                      | Genotyping method           |    |      |      |              |                    |              |   |       |       |       |       |
|                                      | <i>TaqMan PCR</i>           | 4  | 1242 | 1427 | <b>1.410</b> | <b>1.106-1.798</b> | <b>0.006</b> | F | 4.449 | 0.217 | 32.57 | 0.813 |
|                                      | <i>RFLP-PCR</i>             | 2  | 348  | 353  | 1.424        | 0.878-2.312        | 0.152        | F | 0.111 | 0.739 | 0.0   | NA    |
|                                      | <i>SNPlex technology</i>    | 2  | 560  | 483  | 0.793        | 0.503-1.249        | 0.317        | F | 0.761 | 0.383 | 0.0   | NA    |
|                                      | <i>Other methods</i>        | 2  | 439  | 356  | 0.945        | 0.641-1.392        | 0.775        | F | 0.131 | 0.717 | 0.0   | NA    |
|                                      | Source of controls          |    |      |      |              |                    |              |   |       |       |       |       |
|                                      | <i>Population-based</i>     | 6  | 1490 | 1579 | 1.169        | 0.923-1.481        | 0.195        | F | 8.640 | 0.124 | 42.13 | 0.793 |
|                                      | <i>Hospital-based</i>       | 4  | 1099 | 1040 | 1.228        | 0.947-1.592        | 0.122        | F | 3.563 | 0.313 | 15.81 | 0.951 |
|                                      | HWE in controls             |    |      |      |              |                    |              |   |       |       |       |       |
|                                      | <i>Equilibrium</i>          | 9  | 2206 | 2306 | <b>1.266</b> | <b>1.054-1.521</b> | <b>0.012</b> | F | 8.172 | 0.417 | 2.104 | 0.919 |
|                                      | <i>Disequilibrium</i>       | 1  | 383  | 313  | 0.677        | 0.380-1.206        | 0.185        | F | 0.0   | 1.0   | 0.0   | NA    |
|                                      | Quality score               |    |      |      |              |                    |              |   |       |       |       |       |
|                                      | <i>High quality</i>         | 8  | 2262 | 2321 | 1.125        | 0.933-1.358        | 0.217        | F | 8.325 | 0.305 | 15.92 | 0.705 |
|                                      | <i>Low quality</i>          | 2  | 327  | 298  | <b>1.787</b> | <b>1.101-2.902</b> | <b>0.019</b> | F | 0.907 | 0.341 | 0.0   | NA    |
| Heterozygote model<br>(AG versus AA) | Overall                     | 10 | 3793 | 3936 | 0.983        | 0.882-1.095        | 0.753        | R | 14.99 | 0.091 | 39.98 | 0.021 |
|                                      | Geographical region         |    |      |      |              |                    |              |   |       |       |       |       |
|                                      | <i>Asian</i>                | 6  | 2580 | 2624 | 1.009        | 0.904-1.127        | 0.871        | F | 5.926 | 0.313 | 15.63 | 0.043 |
|                                      | <i>European</i>             | 2  | 466  | 666  | 0.839        | 0.354-1.989        | 0.690        | R | 8.726 | 0.003 | 88.54 | NA    |
|                                      | <i>American</i>             | 2  | 747  | 646  | 0.937        | 0.746-1.177        | 0.575        | F | 0.008 | 0.930 | 0.0   | NA    |
|                                      | Cancer type                 |    |      |      |              |                    |              |   |       |       |       |       |
|                                      | <i>Bladder cancer</i>       | 2  | 1141 | 1103 | 1.082        | 0.910-1.286        | 0.371        | F | 1.786 | 0.181 | 44.01 | NA    |
|                                      | <i>Breast cancer</i>        | 2  | 1148 | 1155 | 1.111        | 0.941-1.311        | 0.213        | F | 1.116 | 0.291 | 10.42 | NA    |
|                                      | <i>CLL</i>                  | 1  | 97   | 327  | <b>0.527</b> | <b>0.320-0.870</b> | <b>0.012</b> | F | 0.0   | 1.0   | 0.0   | NA    |
|                                      | <i>Colorectal cancer</i>    | 1  | 378  | 379  | 0.863        | 0.647-1.152        | 0.318        | F | 0.0   | 1.0   | 0.0   | NA    |
|                                      | <i>Gastric cancer</i>       | 1  | 571  | 453  | 0.990        | 0.773-1.269        | 0.938        | F | 0.0   | 1.0   | 0.0   | NA    |
|                                      | <i>HCC</i>                  | 1  | 134  | 198  | 0.818        | 0.524-1.277        | 0.377        | F | 0.0   | 1.0   | 0.0   | NA    |
|                                      | <i>Lung Cancer</i>          | 1  | 88   | 90   | 0.673        | 0.365-1.238        | 0.203        | F | 0.0   | 1.0   | 0.0   | NA    |
|                                      | <i>Renal cell carcinoma</i> | 1  | 236  | 231  | 0.950        | 0.645-1.400        | 0.796        | F | 0.0   | 1.0   | 0.0   | NA    |
|                                      | Genotyping method           |    |      |      |              |                    |              |   |       |       |       |       |
|                                      | <i>TaqMan PCR</i>           | 4  | 1875 | 2170 | 1.028        | 0.800-1.321        | 0.831        | R | 9.809 | 0.020 | 69.42 | 0.339 |
|                                      | <i>RFLP-PCR</i>             | 2  | 512  | 577  | 0.850        | 0.667-1.083        | 0.187        | F | 0.040 | 0.841 | 0.0   | NA    |
|                                      | <i>SNPlex technology</i>    | 2  | 747  | 646  | 0.937        | 0.746-1.177        | 0.575        | F | 0.008 | 0.930 | 0.0   | NA    |
|                                      | <i>Other methods</i>        | 2  | 659  | 543  | 0.937        | 0.745-1.179        | 0.581        | F | 1.324 | 0.250 | 24.45 | NA    |
|                                      | Source of controls          |    |      |      |              |                    |              |   |       |       |       |       |
|                                      | <i>Population-based</i>     | 6  | 2126 | 2326 | 0.947        | 0.784-1.145        | 0.576        | R | 9.990 | 0.076 | 49.95 | 0.164 |
|                                      | <i>Hospital-based</i>       | 4  | 1667 | 1610 | 1.011        | 0.880-1.162        | 0.878        | F | 4.931 | 0.177 | 39.16 | 0.180 |
|                                      | HWE in controls             |    |      |      |              |                    |              |   |       |       |       |       |
|                                      | <i>Equilibrium</i>          | 9  | 3282 | 3521 | 0.969        | 0.840-1.117        | 0.660        | R | 14.74 | 0.064 | 45.72 | 0.031 |
|                                      | <i>Disequilibrium</i>       | 1  | 511  | 415  | 0.930        | 0.702-1.232        | 0.613        | F | 0.0   | 1.0   | 0.0   | NA    |
|                                      | Quality score               |    |      |      |              |                    |              |   |       |       |       |       |

|  |                     |   |      |      |       |             |       |   |       |       |       |       |
|--|---------------------|---|------|------|-------|-------------|-------|---|-------|-------|-------|-------|
|  | <i>High quality</i> | 8 | 3336 | 3507 | 0.981 | 0.889-1.082 | 0.700 | F | 10.78 | 0.148 | 35.08 | 0.012 |
|  | <i>Low quality</i>  | 2 | 457  | 429  | 0.980 | 0.529-1.815 | 0.949 | R | 3.374 | 0.066 | 70.36 | NA    |

OR: odds ratio, CI: confidence interval, F: fixed model, R: random model, NA: not appreciable

Supplementary Table S7. Meta-analysis of the association between **DROSHA (G > C; rs6877842)** variant and cancer risk.

| Comparison                                          | Subgroups                   | No. of studies | Sample size |         | Test of association |                    |              |       | Test of heterogeneity |         |                    | Publication bias  |
|-----------------------------------------------------|-----------------------------|----------------|-------------|---------|---------------------|--------------------|--------------|-------|-----------------------|---------|--------------------|-------------------|
|                                                     |                             |                | Cancer      | Control | OR                  | 95% CI             | P-value      | Model | Q test                | P-value | I <sup>2</sup> (%) | P-value (Egger's) |
| <b>Allelic model<br/>(C allele versus G allele)</b> | <b>Overall</b>              | 8              | 3400        | 4106    | 1.035               | 0.888-1.207        | 0.659        | R     | 18.32                 | 0.011   | 61.79              | 0.710             |
|                                                     | <b>Geographical region</b>  |                |             |         |                     |                    |              |       |                       |         |                    |                   |
|                                                     | <i>Asian</i>                | 3              | 720         | 864     | 0.897               | 0.582-1.384        | 0.624        | F     | 3.336                 | 0.189   | 40.04              | <b>0.082*</b>     |
|                                                     | <i>European</i>             | 3              | 660         | 1222    | 0.894               | 0.476-1.515        | 0.580        | R     | 12.95                 | 0.002   | 84.55              | 0.715             |
|                                                     | <i>American</i>             | 2              | 2020        | 2020    | 1.058               | 0.897-1.249        | 0.502        | F     | 0.012                 | 0.913   | 0.0                | NA                |
|                                                     | <b>Cancer type</b>          |                |             |         |                     |                    |              |       |                       |         |                    |                   |
|                                                     | <i>Larynx cancer</i>        | 2              | 456         | 540     | <b>0.638</b>        | <b>0.481-0.847</b> | <b>0.002</b> | F     | 0.104                 | 0.747   | 0.0                | NA                |
|                                                     | <i>Bladder cancer</i>       | 1              | 1470        | 1464    | 1.064               | 0.878-1.289        | 0.526        | F     | 0.0                   | 1.0     | 0.0                | NA                |
|                                                     | <i>CLL</i>                  | 1              | 204         | 682     | <b>1.505</b>        | <b>1.035-2.189</b> | <b>0.032</b> | F     | 0.0                   | 1.0     | 0.0                | NA                |
|                                                     | <i>HCC</i>                  | 1              | 294         | 418     | 1.435               | 0.563-3.660        | 0.450        | F     | 0.0                   | 1.0     | 0.0                | NA                |
|                                                     | <i>Lung cancer</i>          | 1              | 186         | 186     | 1.323               | 0.565-3.096        | 0.520        | F     | 0.0                   | 1.0     | 0.0                | NA                |
|                                                     | <i>PTC</i>                  | 1              | 240         | 260     | 0.613               | 0.337-1.113        | 0.108        | F     | 0.0                   | 1.0     | 0.0                | NA                |
|                                                     | <i>Renal cell carcinoma</i> | 1              | 550         | 556     | 1.042               | 0.750-1.447        | 0.807        | F     | 0.0                   | 1.0     | 0.0                | NA                |
|                                                     | <b>Genotyping method</b>    |                |             |         |                     |                    |              |       |                       |         |                    |                   |
|                                                     | <i>TaqMan PCR</i>           | 3              | 660         | 1222    | 0.849               | 0.476-1.515        | 0.580        | R     | 12.95                 | 0.002   | 84.55              | 0.715             |
|                                                     | <i>RFLP-PCR</i>             | 2              | 534         | 678     | 0.783               | 0.474-1.296        | 0.342        | F     | 2.258                 | 0.133   | 55.71              | NA                |
|                                                     | <i>SNPlex technology</i>    | 2              | 2020        | 2020    | 1.058               | 0.897-1.249        | 0.502        | F     | 0.012                 | 0.913   | 0.0                | NA                |
|                                                     | <i>Other methods</i>        | 1              | 186         | 186     | 1.323               | 0.565-3.096        | 0.520        | F     | 0.0                   | 1.0     | 0.0                | NA                |
|                                                     | <b>Source of controls</b>   |                |             |         |                     |                    |              |       |                       |         |                    |                   |
|                                                     | <i>Population-based</i>     | 6              | 2958        | 3580    | 0.984               | 0.756-1.280        | 0.904        | R     | 13.02                 | 0.023   | 61.59              | 0.650             |
|                                                     | <i>Hospital-based</i>       | 2              | 442         | 526     | 0.739               | 0.527-1.035        | 0.078        | F     | 2.135                 | 0.144   | 53.16              | NA                |
|                                                     | <b>HWE in controls</b>      |                |             |         |                     |                    |              |       |                       |         |                    |                   |
|                                                     | <i>Equilibrium</i>          | 8              | 3400        | 4106    | 0.943               | 0.741-1.199        | 0.629        | R     | 18.32                 | 0.011   | 61.79              | 0.710             |
|                                                     | <b>Quality score</b>        |                |             |         |                     |                    |              |       |                       |         |                    |                   |
|                                                     | <i>High quality</i>         | 5              | 2758        | 3380    | 1.088               | 0.941-1.258        | 0.253        | F     | 6.896                 | 0.142   | 41.99              | 0.953             |
|                                                     | <i>Low quality</i>          | 3              | 642         | 726     | <b>0.686</b>        | <b>0.524-0.897</b> | <b>0.006</b> | F     | 2.644                 | 0.267   | 24.36              | 0.293             |
| <b>Recessive model<br/>(CC versus GG+GC)</b>        | <b>Overall</b>              | 7              | 1553        | 1844    | 1.326               | 0.835-2.106        | 0.232        | R     | 13.11                 | 0.041   | 54.23              | 0.516             |
|                                                     | <b>Geographical region</b>  |                |             |         |                     |                    |              |       |                       |         |                    |                   |
|                                                     | <i>Asian</i>                | 2              | 213         | 223     | 1.056               | 0.211-5.291        | 0.948        | F     | 0.002                 | 0.963   | 0.0                | NA                |
|                                                     | <i>European</i>             | 3              | 330         | 611     | 1.057               | 0.255-4.386        | 0.939        | R     | 12.64                 | 0.002   | 84.18              | 0.359             |
|                                                     | <i>American</i>             | 2              | 1010        | 1010    | 1.398               | 0.836-2.336        | 0.201        | F     | 0.307                 | 0.579   | 0.0                | NA                |
|                                                     | <b>Cancer type</b>          |                |             |         |                     |                    |              |       |                       |         |                    |                   |
|                                                     | <i>Larynx cancer</i>        | 2              | 228         | 270     | 0.518               | 0.248-1.085        | 0.081        | F     | 0.004                 | 0.952   | 0.0                | NA                |
|                                                     | <i>Bladder cancer</i>       | 1              | 735         | 732     | 1.542               | 0.830-2.867        | 0.171        | F     | 0.0                   | 1.0     | 0.0                | NA                |
|                                                     | <i>CLL</i>                  | 1              | 102         | 341     | <b>4.000</b>        | <b>1.708-9.365</b> | <b>0.001</b> | F     | 0.0                   | 1.0     | 0.0                | NA                |
|                                                     | <i>Lung cancer</i>          | 1              | 93          | 93      | 1.000               | 0.062-16.23        | 1.000        | F     | 0.0                   | 1.0     | 0.0                | NA                |
|                                                     | <i>PTC</i>                  | 1              | 120         | 130     | 1.085               | 0.150-7.824        | 0.936        | F     | 0.0                   | 1.0     | 0.0                | NA                |
|                                                     | <i>Renal cell carcinoma</i> | 1              | 275         | 278     | 1.128               | 0.451-2.820        | 0.797        | F     | 0.0                   | 1.0     | 0.0                | NA                |
|                                                     | <b>Genotyping method</b>    |                |             |         |                     |                    |              |       |                       |         |                    |                   |
|                                                     | <i>TaqMan PCR</i>           | 3              | 330         | 611     | 1.057               | 0.255-4.386        | 0.939        | R     | 12.64                 | 0.002   | 84.18              | 0.395             |
|                                                     | <i>SNPlex technology</i>    | 2              | 1010        | 1010    | 1.398               | 0.836-2.336        | 0.201        | F     | 0.307                 | 0.579   | 0.0                | NA                |
|                                                     | <i>Other methods</i>        | 2              | 213         | 223     | 1.056               | 0.211-5.291        | 0.948        | F     | 0.002                 | 0.963   | 0.0                | NA                |
|                                                     | <b>Source of controls</b>   |                |             |         |                     |                    |              |       |                       |         |                    |                   |
|                                                     | <i>Population-based</i>     | 5              | 1332        | 1581    | 1.445               | 0.757-2.757        | 0.264        | R     | 8.765                 | 0.066   | 54.52              | 0.592             |
|                                                     | <i>Hospital-based</i>       | 2              | 221         | 263     | 0.547               | 0.218-1.375        | 0.200        | F     | 0.202                 | 0.653   | 0.0                | NA                |
|                                                     | <b>HWE in controls</b>      |                |             |         |                     |                    |              |       |                       |         |                    |                   |
|                                                     | <i>Equilibrium</i>          | 7              | 1553        | 1844    | 1.193               | 0.655-2.174        | 0.564        | R     | 13.11                 | 0.041   | 54.23              | 0.516             |
|                                                     | <b>Quality score</b>        |                |             |         |                     |                    |              |       |                       |         |                    |                   |
|                                                     | <i>High quality</i>         | 4              | 1232        | 1481    | <b>1.805</b>        | <b>1.175-2.773</b> | <b>0.007</b> | F     | 4.875                 | 0.181   | 38.46              | 0.883             |
|                                                     | <i>Low quality</i>          | 3              | 321         | 363     | 0.541               | 0.265-1.105        | 0.092        | F     | 0.203                 | 0.903   | 0.0                | 0.022             |
| <b>Dominant model<br/>(GC+CC versus GG)</b>         | <b>Overall</b>              | 8              | 1700        | 2053    | 0.989               | 0.832-1.176        | 0.902        | R     | 13.86                 | 0.054   | 49.51              | 0.610             |
|                                                     | <b>Geographical region</b>  |                |             |         |                     |                    |              |       |                       |         |                    |                   |
|                                                     | <i>Asian</i>                | 3              | 360         | 432     | 0.880               | 0.553-1.400        | 0.589        | F     | 3.968                 | 0.138   | 49.59              | <b>0.030*</b>     |
|                                                     | <i>European</i>             | 3              | 330         | 611     | 0.745               | 0.438-1.269        | 0.279        | R     | 6.987                 | 0.030   | 71.37              | 0.596             |
|                                                     | <i>American</i>             | 2              | 1010        | 1010    | 1.028               | 0.850-1.243        | 0.776        | F     | 0.001                 | 0.973   | 0.0                | NA                |
|                                                     | <b>Cancer type</b>          |                |             |         |                     |                    |              |       |                       |         |                    |                   |
|                                                     | <i>Larynx cancer</i>        | 2              | 228         | 270     | <b>0.573</b>        | <b>0.401-0.819</b> | <b>0.002</b> | F     | 0.165                 | 0.684   | 0.0                | NA                |
|                                                     | <i>Bladder cancer</i>       | 1              | 735         | 732     | 1.026               | 0.823-1.279        | 0.819        | F     | 0.0                   | 1.0     | 0.0                | NA                |
|                                                     | <i>CLL</i>                  | 1              | 102         | 341     | 1.247               | 0.786-1.977        | 0.348        | F     | 0.0                   | 1.0     | 0.0                | NA                |
|                                                     | <i>HCC</i>                  | 1              | 147         | 209     | 1.449               | 0.561-3.744        | 0.443        | F     | 0.0                   | 1.0     | 0.0                | NA                |
|                                                     | <i>Lung cancer</i>          | 1              | 93          | 93      | 1.383               | 0.553-3.458        | 0.488        | F     | 0.0                   | 1.0     | 0.0                | NA                |
|                                                     | <i>PTC</i>                  | 1              | 120         | 130     | 0.550               | 0.286-1.060        | 0.074        | F     | 0.0                   | 1.0     | 0.0                | NA                |

|                                              |                             |   |      |      |              |                    |              |   |       |       |       |       |
|----------------------------------------------|-----------------------------|---|------|------|--------------|--------------------|--------------|---|-------|-------|-------|-------|
|                                              | <i>Renal cell carcinoma</i> | 1 | 275  | 278  | 1.034        | 0.710-1.505        | 0.862        | F | 0.0   | 1.0   | 0.0   | NA    |
|                                              | Genotyping method           |   |      |      |              |                    |              |   |       |       |       |       |
|                                              | <i>TaqMan PCR</i>           | 3 | 330  | 611  | 0.745        | 0.438-1.269        | 0.279        | R | 6.987 | 0.030 | 71.37 | 0.596 |
|                                              | <i>RFLP-PCR</i>             | 2 | 267  | 339  | 0.752        | 0.439-1.290        | 0.301        | F | 2.709 | 0.100 | 63.08 | NA    |
|                                              | <i>SNPlex technology</i>    | 2 | 1010 | 1010 | 1.028        | 0.850-1.243        | 0.776        | F | 0.001 | 0.973 | 0.0   | NA    |
|                                              | <i>Other methods</i>        | 1 | 93   | 93   | 1.383        | 0.553-3.458        | 0.488        | F | 0.0   | 1.0   | 0.0   | NA    |
|                                              | Source of controls          |   |      |      |              |                    |              |   |       |       |       |       |
|                                              | <i>Population-based</i>     | 6 | 1479 | 1790 | 0.923        | 0.711-1.200        | 0.551        | R | 9.676 | 0.085 | 48.33 | 0.530 |
|                                              | <i>Hospital-based</i>       | 2 | 221  | 263  | 0.719        | 0.476-1.087        | 0.118        | F | 2.449 | 0.118 | 59.17 | NA    |
|                                              | HWE in controls             |   |      |      |              |                    |              |   |       |       |       |       |
|                                              | <i>Equilibrium</i>          | 8 | 1700 | 2053 | 0.889        | 0.697-1.134        | 0.344        | R | 13.86 | 0.054 | 49.51 | 0.610 |
|                                              | Quality score               |   |      |      |              |                    |              |   |       |       |       |       |
|                                              | <i>High quality</i>         | 5 | 1379 | 1690 | 1.023        | 0.866-1.209        | 0.788        | F | 4.668 | 0.323 | 14.31 | 0.872 |
|                                              | <i>Low quality</i>          | 3 | 321  | 363  | 0.644        | 0.461-0.898        | 0.009        | F | 3.244 | 0.197 | 38.35 | 0.345 |
| <b>Homozygote model<br/>(CC versus GG)</b>   | <b>Overall</b>              | 7 | 1145 | 1307 | 1.304        | 0.815-2.086        | 0.268        | R | 15.55 | 0.016 | 61.41 | 0.486 |
|                                              | Geographical region         |   |      |      |              |                    |              |   |       |       |       |       |
|                                              | <i>Asian</i>                | 2 | 187  | 187  | 0.993        | 0.198-4.985        | 0.993        | F | 0.001 | 0.970 | 0.0   | NA    |
|                                              | <i>European</i>             | 3 | 220  | 386  | 0.900        | 0.186-4.346        | 0.896        | R | 14.81 | 0.001 | 86.50 | 0.334 |
|                                              | <i>American</i>             | 2 | 738  | 734  | 1.396        | 0.833-2.339        | 0.206        | F | 0.286 | 0.593 | 0.0   | NA    |
|                                              | Cancer type                 |   |      |      |              |                    |              |   |       |       |       |       |
|                                              | <i>Larynx cancer</i>        | 2 | 144  | 144  | <b>0.413</b> | <b>0.193-0.880</b> | <b>0.022</b> | F | 0.001 | 0.978 | 0.0   | NA    |
|                                              | <i>Bladder cancer</i>       | 1 | 528  | 521  | 1.536        | 0.823-2.865        | 0.178        | F | 0.0   | 1.0   | 0.0   | NA    |
|                                              | <i>CLL</i>                  | 1 | 76   | 242  | <b>3.938</b> | <b>1.660-9.340</b> | <b>0.002</b> | F | 0.0   | 1.0   | 0.0   | NA    |
|                                              | <i>Lung cancer</i>          | 1 | 82   | 85   | 1.037        | 0.064-16.86        | 0.980        | F | 0.0   | 1.0   | 0.0   | NA    |
|                                              | <i>PTC</i>                  | 1 | 105  | 102  | 0.971        | 0.134-7.026        | 0.977        | F | 0.0   | 1.0   | 0.0   | NA    |
|                                              | <i>Renal cell carcinoma</i> | 1 | 210  | 213  | 1.133        | 0.451-2.848        | 0.790        | F | 0.0   | 1.0   | 0.0   | NA    |
|                                              | Genotyping method           |   |      |      |              |                    |              |   |       |       |       |       |
|                                              | <i>TaqMan PCR</i>           | 3 | 220  | 386  | 0.900        | 0.186-4.346        | 0.896        | R | 14.81 | 0.001 | 86.50 | 0.334 |
|                                              | <i>SNPlex technology</i>    | 2 | 738  | 734  | 1.396        | 0.833-2.339        | 0.206        | F | 0.286 | 0.593 | 0.0   | NA    |
|                                              | <i>Other methods</i>        | 2 | 187  | 187  | 0.993        | 0.198-4.985        | 0.993        | F | 0.001 | 0.970 | 0.0   | NA    |
|                                              | Source of controls          |   |      |      |              |                    |              |   |       |       |       |       |
|                                              | <i>Population-based</i>     | 5 | 984  | 1131 | 1.346        | 0.665-2.725        | 0.409        | R | 10.19 | 0.037 | 60.74 | 0.535 |
|                                              | <i>Hospital-based</i>       | 2 | 161  | 176  | 0.462        | 0.180-1.184        | 0.108        | F | 0.364 | 0.546 | 0.0   | NA    |
|                                              | HWE in controls             |   |      |      |              |                    |              |   |       |       |       |       |
|                                              | <i>Equilibrium</i>          | 7 | 1145 | 1307 | 1.090        | 0.561-2.117        | 0.800        | R | 15.55 | 0.016 | 61.41 | 0.486 |
|                                              | Quality score               |   |      |      |              |                    |              |   |       |       |       |       |
|                                              | <i>High quality</i>         | 4 | 919  | 1078 | <b>1.779</b> | <b>1.154-2.742</b> | <b>0.009</b> | F | 4.744 | 0.192 | 36.76 | 0.850 |
|                                              | <i>Low quality</i>          | 3 | 226  | 229  | <b>0.440</b> | <b>0.212-0.913</b> | <b>0.028</b> | F | 0.392 | 0.822 | 0.0   | 0.139 |
| <b>Heterozygote model<br/>(GC versus GG)</b> | <b>Overall</b>              | 8 | 1638 | 1989 | 0.893        | 0.764-1.044        | 0.156        | F | 9.965 | 0.191 | 29.75 | 0.615 |
|                                              | Geographical region         |   |      |      |              |                    |              |   |       |       |       |       |
|                                              | <i>Asian</i>                | 3 | 357  | 429  | 0.871        | 0.539-1.409        | 0.574        | F | 4.295 | 0.117 | 53.43 | 0.026 |
|                                              | <i>European</i>             | 3 | 307  | 576  | <b>0.705</b> | <b>0.522-0.952</b> | <b>0.023</b> | F | 2.139 | 0.343 | 6.494 | 0.742 |
|                                              | <i>American</i>             | 2 | 974  | 984  | 0.994        | 0.815-1.211        | 0.949        | F | 0.023 | 0.881 | 0.0   | NA    |
|                                              | Cancer type                 |   |      |      |              |                    |              |   |       |       |       |       |
|                                              | <i>Larynx cancer</i>        | 2 | 217  | 246  | <b>0.604</b> | <b>0.417-0.875</b> | <b>0.008</b> | F | 0.188 | 0.664 | 0.0   | NA    |
|                                              | <i>Bladder cancer</i>       | 1 | 709  | 715  | 0.985        | 0.784-1.237        | 0.896        | F | 0.0   | 1.0   | 0.0   | NA    |
|                                              | <i>CLL</i>                  | 1 | 90   | 330  | 0.948        | 0.567-1.583        | 0.838        | F | 0.0   | 1.0   | 0.0   | NA    |
|                                              | <i>HCC</i>                  | 1 | 147  | 209  | 1.449        | 0.561-3.744        | 0.443        | F | 0.0   | 1.0   | 0.0   | NA    |
|                                              | <i>Lung cancer</i>          | 1 | 92   | 92   | 1.426        | 0.546-3.726        | 0.469        | F | 0.0   | 1.0   | 0.0   | NA    |
|                                              | <i>PTC</i>                  | 1 | 118  | 128  | 0.520        | 0.262-1.032        | 0.061        | F | 0.0   | 1.0   | 0.0   | NA    |
|                                              | <i>Renal cell carcinoma</i> | 1 | 265  | 269  | 1.020        | 0.687-1.514        | 0.922        | F | 0.0   | 1.0   | 0.0   | NA    |
|                                              | Genotyping method           |   |      |      |              |                    |              |   |       |       |       |       |
|                                              | <i>TaqMan PCR</i>           | 3 | 307  | 576  | <b>0.705</b> | <b>0.522-0.952</b> | <b>0.023</b> | F | 2.139 | 0.343 | 6.494 | 0.742 |
|                                              | <i>RFLP-PCR</i>             | 2 | 265  | 337  | 0.822        | 0.303-2.231        | 0.700        | R | 2.945 | 0.086 | 66.05 | NA    |
|                                              | <i>SNPlex technology</i>    | 2 | 974  | 984  | 0.994        | 0.815-1.211        | 0.949        | F | 0.023 | 0.881 | 0.0   | NA    |
|                                              | <i>Other methods</i>        | 1 | 92   | 92   | 1.426        | 0.546-3.726        | 0.469        | F | 0.0   | 1.0   | 0.0   | NA    |
|                                              | Source of controls          |   |      |      |              |                    |              |   |       |       |       |       |
|                                              | <i>Population-based</i>     | 6 | 1424 | 1742 | 0.916        | 0.775-1.083        | 0.306        | F | 7.209 | 0.206 | 30.65 | 0.453 |
|                                              | <i>Hospital-based</i>       | 2 | 214  | 247  | 0.756        | 0.492-1.162        | 0.202        | F | 2.091 | 0.148 | 52.18 | NA    |
|                                              | HWE in controls             |   |      |      |              |                    |              |   |       |       |       |       |
|                                              | <i>Equilibrium</i>          | 8 | 1638 | 1989 | 0.893        | 0.764-1.044        | 0.156        | F | 9.965 | 0.191 | 29.75 | 0.615 |
|                                              | Quality score               |   |      |      |              |                    |              |   |       |       |       |       |
|                                              | <i>High quality</i>         | 5 | 1329 | 1651 | 0.960        | 0.805-1.143        | 0.643        | F | 3.942 | 0.414 | 0.0   | 0.738 |
|                                              | <i>Low quality</i>          | 3 | 309  | 338  | <b>0.675</b> | <b>0.477-0.954</b> | <b>0.026</b> | F | 2.865 | 0.239 | 30.19 | 0.367 |

OR: odds ratio, CI: confidence interval, F: fixed model, R: random model, NA: not appreciable

Supplementary Table S8. Meta-analysis of the association between **DGCR8 (G > A; rs3757)** variant and cancer risk.

| Comparison                                  | Subgroups            | No. of studies | Sample size |         | Test of association |             |         |       | Test of heterogeneity |         |                    | Publication bias  |
|---------------------------------------------|----------------------|----------------|-------------|---------|---------------------|-------------|---------|-------|-----------------------|---------|--------------------|-------------------|
|                                             |                      |                | Cancer      | Control | OR                  | 95% CI      | P-value | Model | Q test                | P-value | I <sup>2</sup> (%) | P-value (Egger's) |
| Allelic model<br>(A allele versus G allele) | Overall              | 7              | 5402        | 5596    | 0.977               | 0.896-1.066 | 0.606   | F     | 3.068                 | 0.800   | 0.0                | 0.868             |
|                                             | Geographical region  |                |             |         |                     |             |         |       |                       |         |                    |                   |
|                                             | Asian                | 4              | 3132        | 3230    | 1.036               | 0.923-1.162 | 0.550   | F     | 0.510                 | 0.917   | 0.0                | 0.972             |
|                                             | European             | 1              | 224         | 340     | 0.846               | 0.606-1.181 | 0.326   | F     | 0.0                   | 1.0     | 0.0                | NA                |
|                                             | American             | 2              | 2026        | 2026    | 0.915               | 0.791-1.059 | 0.234   | F     | 0.089                 | 0.766   | 0.0                | NA                |
|                                             | Cancer type          |                |             |         |                     |             |         |       |                       |         |                    |                   |
|                                             | Lung cancer          | 2              | 1388        | 1380    | 1.067               | 0.880-1.293 | 0.513   | F     | 0.036                 | 0.849   | 0.0                | NA                |
|                                             | Bladder cancer       | 1              | 1474        | 1470    | 0.903               | 0.762-1.071 | 0.242   | F     | 0.0                   | 1.0     | 0.0                | NA                |
|                                             | Cervical cancer      | 1              | 676         | 664     | 0.949               | 0.717-1.256 | 0.714   | F     | 0.0                   | 1.0     | 0.0                | NA                |
|                                             | ESCC                 | 1              | 1068        | 1186    | 1.045               | 0.884-1.235 | 0.605   | F     | 0.0                   | 1.0     | 0.0                | NA                |
|                                             | Larynx cancer        | 1              | 244         | 340     | 0.846               | 0.606-1.181 | 0.326   | F     | 0.0                   | 1.0     | 0.0                | NA                |
|                                             | Renal cell carcinoma | 1              | 552         | 556     | 0.949               | 0.717-1.256 | 0.716   | F     | 0.0                   | 1.0     | 0.0                | NA                |
|                                             | Genotyping method    |                |             |         |                     |             |         |       |                       |         |                    |                   |
|                                             | TaqMan PCR           | 2              | 1444        | 1540    | 0.994               | 0.833-1.186 | 0.945   | F     | 1.243                 | 0.265   | 19.54              | NA                |
|                                             | SNPlex technology    | 2              | 2026        | 2026    | 0.915               | 0.791-1.059 | 0.234   | F     | 0.089                 | 0.766   | 0.0                | NA                |
|                                             | Other methods        | 3              | 1932        | 2030    | 1.026               | 0.894-1.178 | 0.716   | F     | 0.451                 | 0.798   | 0.0                | 0.996             |
|                                             | Source of controls   |                |             |         |                     |             |         |       |                       |         |                    |                   |
|                                             | Population-based     | 3              | 1864        | 2082    | 0.990               | 0.868-1.129 | 0.881   | F     | 1.341                 | 0.511   | 0.0                | 0.141             |
|                                             | Hospital-based       | 4              | 3538        | 3514    | 0.968               | 0.861-1.087 | 0.579   | F     | 1.662                 | 0.645   | 0.0                | 0.460             |
|                                             | HWE in controls      |                |             |         |                     |             |         |       |                       |         |                    |                   |
|                                             | Equilibrium          | 5              | 4090        | 4070    | 0.965               | 0.867-1.074 | 0.514   | F     | 1.677                 | 0.795   | 0.0                | 0.405             |
|                                             | Disequilibrium       | 2              | 1312        | 1526    | 1.002               | 0.863-1.163 | 0.981   | F     | 1.231                 | 0.267   | 18.77              | NA                |
|                                             | Quality score        |                |             |         |                     |             |         |       |                       |         |                    |                   |
|                                             | High quality         | 4              | 3770        | 3876    | 0.967               | 0.873-1.071 | 0.515   | F     | 1.480                 | 0.687   | 0.0                | 0.796             |
|                                             | Low quality          | 3              | 1632        | 1720    | 1.007               | 0.852-1.189 | 0.939   | F     | 1.423                 | 0.491   | 0.0                | 0.863             |
| Recessive model<br>(AA versus GG+GA)        | Overall              | 7              | 2701        | 2798    | 0.812               | 0.618-1.067 | 0.135   | F     | 3.085                 | 0.798   | 0.0                | 0.831             |
|                                             | Geographical region  |                |             |         |                     |             |         |       |                       |         |                    |                   |
|                                             | Asian                | 4              | 1566        | 1615    | 0.972               | 0.644-1.467 | 0.891   | F     | 0.131                 | 0.988   | 0.0                | 0.880             |
|                                             | European             | 1              | 122         | 170     | 0.350               | 0.113-1.083 | 0.068   | F     | 0.0                   | 1.0     | 0.0                | NA                |
|                                             | American             | 2              | 1013        | 1013    | 0.766               | 0.522-1.125 | 0.174   | F     | 0.004                 | 0.952   | 0.0                | NA                |
|                                             | Cancer type          |                |             |         |                     |             |         |       |                       |         |                    |                   |
|                                             | Lung cancer          | 2              | 694         | 690     | 1.029               | 0.593-1.784 | 0.920   | F     | 0.032                 | 0.857   | 0.0                | NA                |
|                                             | Bladder cancer       | 1              | 737         | 735     | 0.761               | 0.492-1.178 | 0.220   | F     | 0.0                   | 1.0     | 0.0                | NA                |
|                                             | Cervical cancer      | 1              | 338         | 332     | 0.881               | 0.353-2.196 | 0.785   | F     | 0.0                   | 1.0     | 0.0                | NA                |
|                                             | ESCC                 | 1              | 534         | 593     | 0.924               | 0.396-2.156 | 0.855   | F     | 0.0                   | 1.0     | 0.0                | NA                |
|                                             | Larynx cancer        | 1              | 122         | 170     | 0.350               | 0.113-1.083 | 0.068   | F     | 0.0                   | 1.0     | 0.0                | NA                |
|                                             | Renal cell carcinoma | 1              | 276         | 278     | 0.783               | 0.349-1.756 | 0.552   | F     | 0.0                   | 1.0     | 0.0                | NA                |
|                                             | Genotyping method    |                |             |         |                     |             |         |       |                       |         |                    |                   |
|                                             | TaqMan PCR           | 2              | 722         | 770     | 0.779               | 0.449-1.351 | 0.374   | F     | 2.529                 | 0.112   | 60.47              | NA                |
|                                             | SNPlex technology    | 2              | 1013        | 1013    | 0.766               | 0.522-1.125 | 0.174   | F     | 0.004                 | 0.952   | 0.0                | NA                |
|                                             | Other methods        | 3              | 966         | 1015    | 0.951               | 0.552-1.640 | 0.857   | F     | 0.118                 | 0.943   | 0.0                | 0.309             |
|                                             | Source of controls   |                |             |         |                     |             |         |       |                       |         |                    |                   |
|                                             | Population-based     | 3              | 932         | 1041    | 0.703               | 0.418-1.181 | 0.183   | F     | 1.931                 | 0.381   | 0.0                | 0.218             |
|                                             | Hospital-based       | 4              | 1769        | 1757    | 0.858               | 0.623-1.182 | 0.349   | F     | 0.742                 | 0.863   | 0.0                | 0.221             |
|                                             | HWE in controls      |                |             |         |                     |             |         |       |                       |         |                    |                   |
|                                             | Equilibrium          | 5              | 2045        | 2035    | 0.847               | 0.629-1.141 | 0.276   | F     | 0.785                 | 0.940   | 0.0                | 0.244             |
|                                             | Disequilibrium       | 2              | 656         | 763     | 0.651               | 0.331-1.283 | 0.215   | F     | 1.814                 | 0.178   | 44.88              | NA                |
|                                             | Quality score        |                |             |         |                     |             |         |       |                       |         |                    |                   |
|                                             | High quality         | 4              | 1885        | 1938    | 0.802               | 0.578-1.112 | 0.185   | F     | 0.206                 | 0.977   | 0.0                | 0.179             |
|                                             | Low quality          | 3              | 816         | 860     | 0.836               | 0.510-1.372 | 0.479   | F     | 2.859                 | 0.239   | 30.05              | 0.645             |
| Dominant model<br>(GA+AA versus GG)         | Overall              | 7              | 2701        | 2798    | 1.000               | 0.890-1.123 | 0.997   | F     | 2.823                 | 0.831   | 0.0                | 0.733             |
|                                             | Geographical region  |                |             |         |                     |             |         |       |                       |         |                    |                   |
|                                             | Asian                | 4              | 1566        | 1615    | 1.075               | 0.916-1.262 | 0.377   | F     | 1.028                 | 0.794   | 0.0                | 0.866             |
|                                             | European             | 1              | 122         | 170     | 0.862               | 0.494-1.502 | 0.599   | F     | 0.0                   | 1.0     | 0.0                | NA                |
|                                             | American             | 2              | 1013        | 1013    | 0.929               | 0.779-1.109 | 0.417   | F     | 0.078                 | 0.780   | 0.0                | NA                |
|                                             | Cancer type          |                |             |         |                     |             |         |       |                       |         |                    |                   |
|                                             | Lung cancer          | 2              | 694         | 690     | 1.086               | 0.868-1.360 | 0.470   | F     | 0.022                 | 0.883   | 0.0                | NA                |
|                                             | Bladder cancer       | 1              | 737         | 735     | 0.915               | 0.743-1.126 | 0.402   | F     | 0.0                   | 1.0     | 0.0                | NA                |
|                                             | Cervical cancer      | 1              | 338         | 332     | 0.948               | 0.686-1.309 | 0.745   | F     | 0.0                   | 1.0     | 0.0                | NA                |
|                                             | ESCC                 | 1              | 534         | 593     | 1.197               | 0.863-1.660 | 0.281   | F     | 0.0                   | 1.0     | 0.0                | NA                |
|                                             | Larynx cancer        | 1              | 122         | 170     | 0.862               | 0.494-1.502 | 0.599   | F     | 0.0                   | 1.0     | 0.0                | NA                |
|                                             | Renal cell carcinoma | 1              | 276         | 278     | 0.968               | 0.690-1.358 | 0.851   | F     | 0.0                   | 1.0     | 0.0                | NA                |
|                                             | Genotyping method    |                |             |         |                     |             |         |       |                       |         |                    |                   |
|                                             | TaqMan PCR           | 2              | 722         | 770     | 1.041               | 0.834-1.299 | 0.722   | F     | 0.529                 | 0.467   | 0.0                | NA                |
|                                             | SNPlex technology    | 2              | 1013        | 1013    | 0.929               | 0.779-1.109 | 0.417   | F     | 0.078                 | 0.780   | 0.0                | NA                |
|                                             | Other methods        | 3              | 966         | 1015    | 1.072               | 0.865-1.329 | 0.526   | F     | 1.027                 | 0.598   | 0.0                | 0.867             |



|                                      |                      |   |      |      |       |             |       |   |       |       |       |       |
|--------------------------------------|----------------------|---|------|------|-------|-------------|-------|---|-------|-------|-------|-------|
| Homozygote model<br>(AA versus GG)   | Source of controls   |   |      |      |       |             |       |   |       |       |       |       |
|                                      | Population-based     | 3 | 932  | 1041 | 1.044 | 0.841-1.296 | 0.698 | F | 1.320 | 0.517 | 0.0   | 0.517 |
|                                      | Hospital-based       | 4 | 1769 | 1757 | 0.982 | 0.856-1.128 | 0.801 | F | 1.288 | 0.732 | 0.0   | 0.556 |
|                                      | HWE in controls      |   |      |      |       |             |       |   |       |       |       |       |
|                                      | Equilibrium          | 5 | 2045 | 2035 | 0.980 | 0.863-1.114 | 0.761 | F | 1.294 | 0.862 | 0.0   | 0.504 |
|                                      | Disequilibrium       | 2 | 656  | 763  | 1.100 | 0.830-1.458 | 0.508 | F | 0.998 | 0.318 | 0.0   | NA    |
|                                      | Quality score        |   |      |      |       |             |       |   |       |       |       |       |
|                                      | High quality         | 4 | 1885 | 1938 | 0.977 | 0.849-1.124 | 0.747 | F | 1.899 | 0.594 | 0.0   | 0.402 |
|                                      | Low quality          | 3 | 816  | 860  | 1.051 | 0.854-1.295 | 0.636 | F | 0.595 | 0.743 | 0.0   | 0.697 |
|                                      | Overall              | 7 | 1498 | 1538 | 0.824 | 0.624-1.088 | 0.171 | F | 3.573 | 0.734 | 0.0   | 0.929 |
|                                      | Geographical region  |   |      |      |       |             |       |   |       |       |       |       |
|                                      | Asian                | 4 | 811  | 837  | 1.019 | 0.670-1.550 | 0.931 | F | 0.185 | 0.980 | 0.0   | 0.816 |
|                                      | European             | 1 | 33   | 51   | 0.331 | 0.099-1.106 | 0.073 | F | 0.0   | 1.0   | 0.0   | NA    |
|                                      | American             | 2 | 654  | 650  | 0.754 | 0.510-1.113 | 0.155 | F | 0.009 | 0.923 | 0.0   | NA    |
|                                      | Cancer type          |   |      |      |       |             |       |   |       |       |       |       |
|                                      | Lung cancer          | 2 | 487  | 496  | 1.057 | 0.606-1.842 | 0.846 | F | 0.037 | 0.847 | 0.0   | NA    |
|                                      | Bladder cancer       | 1 | 480  | 474  | 0.746 | 0.478-1.163 | 0.195 | F | 0.0   | 1.0   | 0.0   | NA    |
|                                      | Cervical cancer      | 1 | 239  | 232  | 0.869 | 0.346-2.178 | 0.764 | F | 0.0   | 1.0   | 0.0   | NA    |
|                                      | ESCC                 | 1 | 85   | 109  | 1.078 | 0.442-2.629 | 0.869 | F | 0.0   | 1.0   | 0.0   | NA    |
|                                      | Larynx cancer        | 1 | 33   | 51   | 0.331 | 0.099-1.106 | 0.073 | F | 0.0   | 1.0   | 0.0   | NA    |
| Heterozygote model<br>(GA versus GG) | Renal cell carcinoma | 1 | 174  | 176  | 0.781 | 0.344-1.771 | 0.554 | F | 0.0   | 1.0   | 0.0   | NA    |
|                                      | Genotyping method    |   |      |      |       |             |       |   |       |       |       |       |
|                                      | TaqMan PCR           | 2 | 453  | 481  | 0.802 | 0.457-1.407 | 0.442 | F | 2.640 | 0.104 | 62.12 | NA    |
|                                      | SNPlex technology    | 2 | 654  | 650  | 0.754 | 0.510-1.113 | 0.155 | F | 0.009 | 0.923 | 0.0   | NA    |
|                                      | Other methods        | 3 | 391  | 407  | 1.014 | 0.580-1.773 | 0.961 | F | 0.184 | 0.912 | 0.0   | 0.632 |
|                                      | Source of controls   |   |      |      |       |             |       |   |       |       |       |       |
|                                      | Population-based     | 3 | 292  | 336  | 0.740 | 0.431-1.269 | 0.274 | F | 2.407 | 0.300 | 16.92 | 0.361 |
|                                      | Hospital-based       | 4 | 1206 | 1202 | 0.856 | 0.619-1.184 | 0.348 | F | 0.961 | 0.811 | 0.0   | 0.248 |
|                                      | HWE in controls      |   |      |      |       |             |       |   |       |       |       |       |
|                                      | Equilibrium          | 5 | 1380 | 1378 | 0.845 | 0.625-1.143 | 0.275 | F | 1.002 | 0.909 | 0.0   | 0.255 |
|                                      | Disequilibrium       | 2 | 118  | 160  | 0.710 | 0.347-1.455 | 0.350 | F | 2.378 | 0.123 | 57.95 | NA    |
|                                      | Quality score        |   |      |      |       |             |       |   |       |       |       |       |
|                                      | High quality         | 4 | 978  | 991  | 0.807 | 0.578-1.126 | 0.208 | F | 0.557 | 0.906 | 0.0   | 0.242 |
|                                      | Low quality          | 3 | 520  | 547  | 0.862 | 0.521-1.429 | 0.565 | F | 2.970 | 0.226 | 32.66 | 0.616 |
|                                      | Overall              | 7 | 2602 | 2672 | 1.021 | 0.905-1.152 | 0.737 | F | 1.990 | 0.921 | 0.0   | 0.740 |
|                                      | Geographical region  |   |      |      |       |             |       |   |       |       |       |       |
|                                      | Asian                | 4 | 1520 | 1567 | 1.082 | 0.917-1.276 | 0.353 | F | 0.930 | 0.818 | 0.0   | 0.933 |
|                                      | European             | 1 | 118  | 155  | 0.928 | 0.530-1.627 | 0.795 | F | 0.0   | 1.0   | 0.0   | NA    |
|                                      | American             | 2 | 964  | 950  | 0.960 | 0.798-1.155 | 0.663 | F | 0.053 | 0.818 | 0.0   | NA    |
|                                      | Cancer type          |   |      |      |       |             |       |   |       |       |       |       |
|                                      | Lung cancer          | 2 | 667  | 664  | 1.090 | 0.863-1.378 | 0.470 | F | 0.010 | 0.920 | 0.0   | NA    |
|                                      | Bladder cancer       | 1 | 699  | 686  | 0.947 | 0.762-1.177 | 0.623 | F | 0.0   | 1.0   | 0.0   | NA    |
|                                      | Cervical cancer      | 1 | 329  | 322  | 0.956 | 0.685-1.334 | 0.789 | F | 0.0   | 1.0   | 0.0   | NA    |
|                                      | ESCC                 | 1 | 524  | 581  | 1.200 | 0.865-1.665 | 0.276 | F | 0.0   | 1.0   | 0.0   | NA    |
|                                      | Larynx cancer        | 1 | 118  | 155  | 0.928 | 0.530-1.627 | 0.795 | F | 0.0   | 1.0   | 0.0   | NA    |
|                                      | Renal cell carcinoma | 1 | 265  | 264  | 0.994 | 0.700-1.411 | 0.973 | F | 0.0   | 1.0   | 0.0   | NA    |
|                                      | Genotyping method    |   |      |      |       |             |       |   |       |       |       |       |
|                                      | TaqMan PCR           | 2 | 698  | 735  | 1.057 | 0.841-1.330 | 0.633 | F | 0.248 | 0.618 | 0.0   | NA    |
|                                      | SNPlex technology    | 2 | 964  | 950  | 0.960 | 0.798-1.155 | 0.663 | F | 0.053 | 0.818 | 0.0   | NA    |
|                                      | Other methods        | 3 | 940  | 987  | 1.079 | 0.866-1.344 | 0.500 | F | 0.928 | 0.629 | 0.0   | 0.929 |
|                                      | Source of controls   |   |      |      |       |             |       |   |       |       |       |       |
|                                      | Population-based     | 3 | 907  | 1000 | 1.071 | 0.859-1.334 | 0.543 | F | 0.886 | 0.642 | 0.0   | 0.528 |
|                                      | Hospital-based       | 4 | 1695 | 1672 | 1.000 | 0.866-1.155 | 0.997 | F | 0.846 | 0.838 | 0.0   | 0.633 |
|                                      | HWE in controls      |   |      |      |       |             |       |   |       |       |       |       |
|                                      | Equilibrium          | 5 | 1960 | 1936 | 0.999 | 0.875-1.142 | 0.992 | F | 0.848 | 0.932 | 0.0   | 0.576 |
|                                      | Disequilibrium       | 2 | 642  | 736  | 1.124 | 0.847-1.492 | 0.418 | F | 0.599 | 0.439 | 0.0   | NA    |
|                                      | Quality score        |   |      |      |       |             |       |   |       |       |       |       |
|                                      | High quality         | 4 | 1817 | 1853 | 1.002 | 0.867-1.158 | 0.981 | F | 1.502 | 0.682 | 0.0   | 0.505 |
|                                      | Low quality          | 3 | 785  | 819  | 1.065 | 0.858-1.321 | 0.571 | F | 0.279 | 0.870 | 0.0   | 0.717 |

OR: odds ratio, CI: confidence interval, F: fixed model, R: random model, NA: not appreciable

Supplementary Table S9. Meta-analysis of the association between **DGCR8 (G > A; rs417309)** variant and cancer risk.

| Comparison                                         | Subgroups                   | No. of studies | Sample size |         | Test of association |                    |              |       | Test of heterogeneity |         |                    | Publication bias  |
|----------------------------------------------------|-----------------------------|----------------|-------------|---------|---------------------|--------------------|--------------|-------|-----------------------|---------|--------------------|-------------------|
|                                                    |                             |                | Cancer      | Control | OR                  | 95% CI             | P-value      | Model | Q test                | P-value | I <sup>2</sup> (%) | P-value (Egger's) |
| <b>Allelic model</b><br>(A allele versus G allele) | <b>Overall</b>              | 7              | 4584        | 5244    | <b>1.260</b>        | <b>1.079-1.472</b> | <b>0.003</b> | F     | 8.628                 | 0.196   | 30.46              | 0.318             |
|                                                    | <b>Geographical region</b>  |                |             |         |                     |                    |              |       |                       |         |                    |                   |
|                                                    | <i>Asian</i>                | 2              | 1916        | 1980    | 1.336               | 0.982-1.817        | 0.065        | F     | 0.807                 | 0.369   | 0.0                | NA                |
|                                                    | <i>European</i>             | 3              | 634         | 1232    | <b>1.376</b>        | <b>1.032-1.835</b> | <b>0.030</b> | F     | 6.607                 | 0.037   | 69.73              | 0.231             |
|                                                    | <i>American</i>             | 2              | 2034        | 2032    | 1.153               | 0.916-1.451        | 0.224        | F     | 0.148                 | 0.701   | 0.0                | NA                |
|                                                    | <b>Cancer type</b>          |                |             |         |                     |                    |              |       |                       |         |                    |                   |
|                                                    | <i>Larynx cancer</i>        | 2              | 424         | 540     | <b>1.603</b>        | <b>1.175-2.188</b> | <b>0.003</b> | F     | 0.030                 | 0.863   | 0.0                | NA                |
|                                                    | <i>Bladder Cancer</i>       | 1              | 1480        | 1476    | 1.183               | 0.909-1.539        | 0.212        | F     | 0.0                   | 1.0     | 0.0                | NA                |
|                                                    | <i>Breast cancer</i>        | 1              | 1720        | 1786    | <b>1.400</b>        | <b>1.012-1.936</b> | <b>0.042</b> | F     | 0.0                   | 1.0     | 0.0                | NA                |
|                                                    | <i>CLL</i>                  | 1              | 210         | 692     | 0.544               | 0.253-1.169        | 0.119        | F     | 0.0                   | 1.0     | 0.0                | NA                |
|                                                    | <i>Lung cancer</i>          | 1              | 196         | 194     | 0.875               | 0.330-2.316        | 0.788        | F     | 0.0                   | 1.0     | 0.0                | NA                |
|                                                    | <i>Renal cell carcinoma</i> | 1              | 554         | 556     | 1.064               | 0.664-1.705        | 0.797        | F     | 0.0                   | 1.0     | 0.0                | NA                |
|                                                    | <b>Genotyping method</b>    |                |             |         |                     |                    |              |       |                       |         |                    |                   |
|                                                    | <i>TaqMan PCR</i>           | 4              | 2354        | 3018    | 1.319               | 0.937-1.856        | 0.112        | R     | 6.613                 | 0.085   | 54.63              | 0.282             |
|                                                    | <i>SNPlex technology</i>    | 2              | 2034        | 2032    | 1.153               | 0.916-1.451        | 0.224        | F     | 0.148                 | 0.701   | 0.0                | NA                |
|                                                    | <i>Other methods</i>        | 1              | 196         | 194     | 0.875               | 0.330-2.316        | 0.788        | F     | 0.0                   | 1.0     | 0.0                | NA                |
|                                                    | <b>Source of controls</b>   |                |             |         |                     |                    |              |       |                       |         |                    |                   |
|                                                    | <i>Population-based</i>     | 5              | 2908        | 3574    | 1.325               | 1.089-1.611        | 0.005        | F     | 7.616                 | 0.107   | 47.48              | 0.163             |
|                                                    | <i>Hospital-based</i>       | 2              | 1676        | 1670    | 1.159               | 0.899-1.494        | 0.256        | F     | 0.343                 | 0.558   | 0.0                | NA                |
|                                                    | <b>HWE in controls</b>      |                |             |         |                     |                    |              |       |                       |         |                    |                   |
|                                                    | <i>Equilibrium</i>          | 7              | 4584        | 5244    | <b>1.260</b>        | <b>1.079-1.472</b> | <b>0.003</b> | F     | 8.628                 | 0.196   | 30.46              | 0.318             |
|                                                    | <b>Quality score</b>        |                |             |         |                     |                    |              |       |                       |         |                    |                   |
|                                                    | <i>High quality</i>         | 4              | 3964        | 4510    | 1.175               | 0.979-1.410        | 0.083        | F     | 5.186                 | 0.159   | 42.15              | 0.185             |
|                                                    | <i>Low quality</i>          | 3              | 620         | 734     | <b>1.516</b>        | <b>1.127-2.038</b> | <b>0.006</b> | F     | 1.380                 | 0.502   | 0.0                | 0.238             |
| <b>Recessive model</b><br>(AA versus GG+GA)        | <b>Overall</b>              | 5              | 1334        | 1632    | <b>2.582</b>        | <b>1.478-4.511</b> | <b>0.001</b> | F     | 0.948                 | 0.918   | 0.0                | 0.722             |
|                                                    | <b>Geographical region</b>  |                |             |         |                     |                    |              |       |                       |         |                    |                   |
|                                                    | <i>European</i>             | 3              | 317         | 616     | <b>2.636</b>        | <b>1.326-5.239</b> | <b>0.006</b> | F     | 0.700                 | 0.705   | 0.0                | 0.410             |
|                                                    | <i>American</i>             | 2              | 1017        | 1016    | 2.481               | 0.954-6.457        | 0.062        | F     | 0.237                 | 0.626   | 0.0                | NA                |
|                                                    | <b>Cancer type</b>          |                |             |         |                     |                    |              |       |                       |         |                    |                   |
|                                                    | <i>Larynx cancer</i>        | 2              | 212         | 270     | <b>2.878</b>        | <b>1.400-5.915</b> | <b>0.004</b> | F     | 0.075                 | 0.784   | 0.0                | NA                |
|                                                    | <i>Bladder Cancer</i>       | 1              | 740         | 738     | 2.212               | 0.765-6.398        | 0.143        | F     | 0.0                   | 1.0     | 0.0                | NA                |
|                                                    | <i>CLL</i>                  | 1              | 105         | 346     | 1.099               | 0.113-10.68        | 0.935        | F     | 0.0                   | 1.0     | 0.0                | NA                |
|                                                    | <i>Renal cell carcinoma</i> | 1              | 277         | 278     | 4.059               | 0.451-36.54        | 0.212        | F     | 0.0                   | 1.0     | 0.0                | NA                |
|                                                    | <b>Genotyping method</b>    |                |             |         |                     |                    |              |       |                       |         |                    |                   |
|                                                    | <i>TaqMan PCR</i>           | 3              | 317         | 616     | <b>2.636</b>        | <b>1.326-5.239</b> | <b>0.006</b> | F     | 0.700                 | 0.705   | 0.0                | 0.410             |
|                                                    | <i>SNPlex technology</i>    | 2              | 1017        | 1016    | 2.481               | 0.954-6.457        | 0.062        | F     | 0.237                 | 0.626   | 0.0                | NA                |
|                                                    | <b>Source of controls</b>   |                |             |         |                     |                    |              |       |                       |         |                    |                   |
|                                                    | <i>Population-based</i>     | 4              | 594         | 894     | <b>2.739</b>        | <b>1.422-5.276</b> | <b>0.003</b> | F     | 0.835                 | 0.841   | 0.0                | 0.697             |
|                                                    | <i>Hospital-based</i>       | 1              | 740         | 738     | 2.212               | 0.765-6.398        | 0.143        | F     | 0.0                   | 1.0     | 0.0                | NA                |
|                                                    | <b>HWE in controls</b>      |                |             |         |                     |                    |              |       |                       |         |                    |                   |
|                                                    | <i>Equilibrium</i>          | 5              | 1334        | 1632    | <b>2.582</b>        | <b>1.478-4.511</b> | <b>0.001</b> | F     | 0.948                 | 0.918   | 0.0                | 0.722             |
|                                                    | <b>Quality score</b>        |                |             |         |                     |                    |              |       |                       |         |                    |                   |
|                                                    | <i>High quality</i>         | 3              | 1122        | 1362    | 2.196               | 0.909-5.301        | 0.080        | F     | 0.656                 | 0.720   | 0.0                | 0.956             |
|                                                    | <i>Low quality</i>          | 2              | 212         | 270     | <b>2.878</b>        | <b>1.400-5.915</b> | <b>0.004</b> | F     | 0.075                 | 0.784   | 0.0                | NA                |
| <b>Dominant model</b><br>(GA+AA versus GG)         | <b>Overall</b>              | 7              | 2292        | 2622    | <b>1.194</b>        | <b>1.009-1.415</b> | <b>0.040</b> | F     | 7.720                 | 0.259   | 22.28              | 0.277             |
|                                                    | <b>Geographical region</b>  |                |             |         |                     |                    |              |       |                       |         |                    |                   |
|                                                    | <i>Asian</i>                | 2              | 958         | 990     | 1.355               | 0.989-1.856        | 0.059        | F     | 0.846                 | 0.358   | 0.0                | NA                |
|                                                    | <i>European</i>             | 3              | 317         | 616     | 1.210               | 0.858-1.707        | 0.278        | F     | 5.510                 | 0.064   | 63.70              | 0.231             |
|                                                    | <i>American</i>             | 2              | 1017        | 1016    | 1.098               | 0.858-1.406        | 0.458        | F     | 0.299                 | 0.585   | 0.0                | NA                |
|                                                    | <b>Cancer type</b>          |                |             |         |                     |                    |              |       |                       |         |                    |                   |
|                                                    | <i>Larynx cancer</i>        | 2              | 212         | 270     | <b>1.460</b>        | <b>1.000-2.131</b> | <b>0.050</b> | F     | 0.005                 | 0.943   | 0.0                | NA                |
|                                                    | <i>Bladder Cancer</i>       | 1              | 740         | 738     | 1.141               | 0.860-1.515        | 0.360        | F     | 0.0                   | 1.0     | 0.0                | NA                |
|                                                    | <i>Breast cancer</i>        | 1              | 860         | 893     | <b>1.423</b>        | <b>1.021-1.983</b> | <b>0.037</b> | F     | 0.0                   | 1.0     | 0.0                | NA                |
|                                                    | <i>CLL</i>                  | 1              | 105         | 346     | 0.490               | 0.214-1.124        | 0.092        | F     | 0.0                   | 1.0     | 0.0                | NA                |
|                                                    | <i>Lung cancer</i>          | 1              | 98          | 97      | 0.869               | 0.321-2.355        | 0.783        | F     | 0.0                   | 1.0     | 0.0                | NA                |
|                                                    | <i>Renal cell carcinoma</i> | 1              | 277         | 278     |                     |                    |              | F     | 0.0                   | 1.0     | 0.0                | NA                |
|                                                    | <b>Genotyping method</b>    |                |             |         |                     |                    |              |       |                       |         |                    |                   |
|                                                    | <i>TaqMan PCR</i>           | 4              | 1177        | 1509    | <b>1.316</b>        | <b>1.036-1.671</b> | <b>0.024</b> | F     | 5.952                 | 0.114   | 49.60              | 0.280             |
|                                                    | <i>SNPlex technology</i>    | 2              | 1017        | 1016    | 1.098               | 0.858-1.406        | 0.458        | F     | 0.299                 | 0.585   | 0.0                | NA                |
|                                                    | <i>Other methods</i>        | 1              | 98          | 97      | 0.869               | 0.321-2.355        | 0.783        | F     | 0.0                   | 1.0     | 0.0                | NA                |
|                                                    | <b>Source of controls</b>   |                |             |         |                     |                    |              |       |                       |         |                    |                   |
|                                                    | <i>Population-based</i>     | 5              | 1454        | 1787    | <b>1.245</b>        | <b>1.003-1.545</b> | <b>0.047</b> | F     | 7.090                 | 0.131   | 43.58              | 0.179             |
|                                                    | <i>Hospital-based</i>       | 2              | 838         | 835     | 1.118               | 0.852-1.469        | 0.421        | F     | 0.266                 | 0.606   | 0.0                | NA                |
|                                                    | <b>HWE in controls</b>      |                |             |         |                     |                    |              |       |                       |         |                    |                   |
|                                                    | <i>Equilibrium</i>          | 7              | 2292        | 2622    | <b>1.194</b>        | <b>1.009-1.415</b> | <b>0.040</b> | F     | 7.720                 | 0.259   | 22.28              | 0.277             |
|                                                    | <b>Quality score</b>        |                |             |         |                     |                    |              |       |                       |         |                    |                   |

|                                              |                             |   |      |      |              |                    |              |   |       |       |       |       |
|----------------------------------------------|-----------------------------|---|------|------|--------------|--------------------|--------------|---|-------|-------|-------|-------|
|                                              | <i>High quality</i>         | 4 | 1982 | 2255 | 1.147        | 0.946-1.391        | 0.162        | F | 6.075 | 0.108 | 50.61 | 0.171 |
|                                              | <i>Low quality</i>          | 3 | 310  | 367  | 1.368        | 0.960-1.948        | 0.083        | F | 0.915 | 0.633 | 0.0   | 0.208 |
| <b>Homozygote model<br/>(AA versus GG)</b>   | <b>Overall</b>              | 5 | 1129 | 1382 | <b>2.659</b> | <b>1.514-4.669</b> | <b>0.001</b> | F | 1.105 | 0.894 | 0.0   | 0.637 |
|                                              | <b>Geographical region</b>  |   |      |      |              |                    |              |   |       |       |       |       |
|                                              | <i>European</i>             | 3 | 251  | 502  | 2.747        | 1.369-5.512        | 0.004        | F | 0.863 | 0.649 | 0.0   | 0.382 |
|                                              | <i>American</i>             | 2 | 878  | 880  | 2.499        | 0.960-6.507        | 0.061        | F | 0.217 | 0.641 | 0.0   | NA    |
|                                              | <b>Cancer type</b>          |   |      |      |              |                    |              |   |       |       |       |       |
|                                              | <i>Larynx cancer</i>        | 2 | 152  | 197  | <b>3.042</b> | <b>1.464-6.321</b> | <b>0.003</b> | F | 0.071 | 0.791 | 0.0   | NA    |
|                                              | <i>Bladder Cancer</i>       | 1 | 631  | 636  | 2.239        | 0.773-6.482        | 0.137        | F | 0.0   | 1.0   | 0.0   | NA    |
|                                              | <i>CLL</i>                  | 1 | 99   | 305  | 1.027        | 0.106-9.989        | 0.982        | F | 0.0   | 1.0   | 0.0   | NA    |
|                                              | <i>Renal cell carcinoma</i> | 1 | 247  | 244  | 4.000        | 0.444-36.05        | 0.217        | F | 0.0   | 1.0   | 0.0   | NA    |
|                                              | <b>Genotyping method</b>    |   |      |      |              |                    |              |   |       |       |       |       |
|                                              | <i>TaqMan PCR</i>           | 3 | 251  | 502  | <b>2.747</b> | <b>1.369-5.512</b> | <b>0.004</b> | F | 0.863 | 0.649 | 0.0   | 0.382 |
|                                              | <i>SNPlex technology</i>    | 2 | 878  | 880  | 2.499        | 0.960-6.507        | <b>0.061</b> | F | 0.217 | 0.641 | 0.0   | NA    |
|                                              | <b>Source of controls</b>   |   |      |      |              |                    |              |   |       |       |       |       |
|                                              | <i>Population-based</i>     | 4 | 498  | 746  | <b>2.843</b> | <b>1.464-5.522</b> | <b>0.002</b> | F | 0.965 | 0.810 | 0.0   | 0.609 |
|                                              | <i>Hospital-based</i>       | 1 | 631  | 636  | 2.239        | 0.773-6.482        | 0.137        | F | 0.0   | 1.0   | 0.0   | NA    |
|                                              | <b>HWE in controls</b>      |   |      |      |              |                    |              |   |       |       |       |       |
|                                              | <i>Equilibrium</i>          | 5 | 1129 | 1382 | <b>2.659</b> | <b>1.514-4.669</b> | <b>0.001</b> | F | 1.105 | 0.894 | 0.0   | 0.637 |
|                                              | <b>Quality score</b>        |   |      |      |              |                    |              |   |       |       |       |       |
|                                              | <i>High quality</i>         | 3 | 977  | 1185 | 2.186        | 0.905-5.282        | 0.082        | F | 0.716 | 0.699 | 0.0   | 0.916 |
|                                              | <i>Low quality</i>          | 2 | 152  | 197  | <b>3.042</b> | <b>1.464-6.321</b> | <b>0.003</b> | F | 0.071 | 0.791 | 0.0   | NA    |
| <b>Heterozygote model<br/>(GA versus GG)</b> | <b>Overall</b>              | 7 | 2251 | 2601 | 1.118        | 0.939-1.332        | 0.211        | F | 7.242 | 0.299 | 17.15 | 0.151 |
|                                              | <b>Geographical region</b>  |   |      |      |              |                    |              |   |       |       |       |       |
|                                              | <i>Asian</i>                | 2 | 958  | 990  | 1.355        | 0.989-1.856        | 0.059        | F | 0.846 | 0.358 | 0.0   | NA    |
|                                              | <i>European</i>             | 3 | 291  | 601  | 1.008        | 0.694-1.465        | 0.965        | F | 3.849 | 0.146 | 48.03 | 0.203 |
|                                              | <i>American</i>             | 2 | 1002 | 1010 | 1.035        | 0.802-1.335        | 0.793        | F | 0.469 | 0.493 | 0.0   | NA    |
|                                              | <b>Cancer type</b>          |   |      |      |              |                    |              |   |       |       |       |       |
|                                              | <i>Larynx cancer</i>        | 2 | 187  | 258  | 1.199        | 0.795-1.810        | 0.386        | F | 0.001 | 0.981 | 0.0   | NA    |
|                                              | <i>Bladder Cancer</i>       | 1 | 729  | 733  | 1.088        | 0.812-1.456        | 0.573        | F | 0.0   | 1.0   | 0.0   | NA    |
|                                              | <i>Breast cancer</i>        | 1 | 860  | 893  | <b>1.423</b> | <b>1.021-1.983</b> | <b>0.037</b> | F | 0.0   | 1.0   | 0.0   | NA    |
|                                              | <i>CLL</i>                  | 1 | 104  | 343  | 0.451        | 0.186-1.094        | 0.078        | F | 0.0   | 1.0   | 0.0   | NA    |
|                                              | <i>Lung cancer</i>          | 1 | 98   | 97   | 0.869        | 0.321-2.355        | 0.783        | F | 0.0   | 1.0   | 0.0   | NA    |
|                                              | <i>Renal cell carcinoma</i> | 1 | 273  | 277  | 0.882        | 0.523-1.487        | 0.638        | F | 0.0   | 1.0   | 0.0   | NA    |
|                                              | <b>Genotyping method</b>    |   |      |      |              |                    |              |   |       |       |       |       |
|                                              | <i>TaqMan PCR</i>           | 4 | 1151 | 1494 | 1.222        | 0.954-1.566        | 0.113        | F | 5.676 | 0.129 | 47.14 | 0.127 |
|                                              | <i>SNPlex technology</i>    | 2 | 1002 | 1010 | 1.035        | 0.802-1.335        | 0.793        | F | 0.469 | 0.493 | 0.0   | NA    |
|                                              | <i>Other methods</i>        | 1 | 98   | 97   | 0.869        | 0.321-2.355        | 0.783        | F | 0.0   | 1.0   | 0.0   | NA    |
|                                              | <b>Source of controls</b>   |   |      |      |              |                    |              |   |       |       |       |       |
|                                              | <i>Population-based</i>     | 5 | 1424 | 1771 | 1.151        | 0.920-1.440        | 0.218        | F | 6.897 | 0.141 | 42.01 | 0.073 |
|                                              | <i>Hospital-based</i>       | 2 | 827  | 830  | 1.068        | 0.807-1.414        | 0.643        | F | 0.179 | 0.672 | 0.0   | NA    |
|                                              | <b>HWE in controls</b>      |   |      |      |              |                    |              |   |       |       |       |       |
|                                              | <i>Equilibrium</i>          | 7 | 2251 | 2601 | 1.118        | 0.939-1.332        | 0.211        | F | 7.242 | 0.299 | 17.15 | 0.151 |
|                                              | <b>Quality score</b>        |   |      |      |              |                    |              |   |       |       |       |       |
|                                              | <i>High quality</i>         | 4 | 1966 | 2246 | 1.030        | 0.738-1.437        | 0.864        | R | 6.880 | 0.076 | 56.40 | 0.175 |
|                                              | <i>Low quality</i>          | 3 | 285  | 355  | 1.144        | 0.782-1.674        | 0.487        | F | 0.343 | 0.842 | 0.0   | 0.148 |

OR: odds ratio, CI: confidence interval, F: fixed model, R: random model, NA: not appreciable

Supplementary Table S10. Meta-analysis of the association between **DGCR8 (T > G; rs1640299)** variant and cancer risk.

| Comparison                                          | Subgroups                   | No. of studies | Sample size |         | Test of association |                    |                   |       | Test of heterogeneity |         |                    | Publication bias  |
|-----------------------------------------------------|-----------------------------|----------------|-------------|---------|---------------------|--------------------|-------------------|-------|-----------------------|---------|--------------------|-------------------|
|                                                     |                             |                | Cancer      | Control | OR                  | 95% CI             | P-value           | Model | Q test                | P-value | I <sup>2</sup> (%) | P-value (Egger's) |
| <b>Allelic model<br/>(G allele versus T allele)</b> | <b>Overall</b>              | 8              | 5380        | 5954    | 0.974               | 0.874-1.085        | 0.627             | R     | 25.69                 | 0.001   | 72.75              | 0.087             |
|                                                     | <b>Geographical region</b>  |                |             |         |                     |                    |                   |       |                       |         |                    |                   |
|                                                     | <i>Asian</i>                | 2              | 1894        | 1976    | 0.957               | 0.829-1.104        | 0.545             | F     | 0.054                 | 0.816   | 0.0                | NA                |
|                                                     | <i>European</i>             | 4              | 1458        | 1948    | 0.808               | 0.524-1.246        | 0.335             | R     | 22.60                 | < 0.001 | 86.73              | 0.038             |
|                                                     | <i>American</i>             | 2              | 2028        | 2030    | 1.051               | 0.929-1.189        | 0.432             | F     | 1.766                 | 0.184   | 43.37              | NA                |
|                                                     | <b>Cancer type</b>          |                |             |         |                     |                    |                   |       |                       |         |                    |                   |
|                                                     | <i>Breast cancer</i>        | 2              | 2524        | 2492    | 1.133               | 0.810-1.585        | 0.465             | R     | 6.910                 | 0.009   | 85.53              | NA                |
|                                                     | <i>Larynx cancer</i>        | 2              | 426         | 540     | <b>0.623</b>        | <b>0.471-0.823</b> | <b>0.001</b>      | F     | 0.040                 | 0.842   | 0.0                | NA                |
|                                                     | <i>Bladder cancer</i>       | 1              | 1474        | 1474    | 1.106               | 0.957-1.278        | 0.172             | F     | 0.0                   | 1.0     | 0.0                | NA                |
|                                                     | <i>CLL</i>                  | 1              | 206         | 698     | 0.744               | 0.543-1.018        | 0.064             | F     | 0.0                   | 1.0     | 0.0                | NA                |
|                                                     | <i>Lung cancer</i>          | 1              | 196         | 194     | 0.908               | 0.574-1.438        | 0.682             | F     | 0.0                   | 1.0     | 0.0                | NA                |
|                                                     | <i>Renal cell carcinoma</i> | 1              | 554         | 556     | 0.917               | 0.725-1.161        | 0.472             | F     | 0.0                   | 1.0     | 0.0                | NA                |
|                                                     | <b>Genotyping method</b>    |                |             |         |                     |                    |                   |       |                       |         |                    |                   |
|                                                     | <i>TaqMan PCR</i>           | 4              | 2330        | 3020    | <b>0.761</b>        | <b>0.596-0.971</b> | <b>0.028</b>      | R     | 8.085                 | 0.044   | 62.89              | 0.020             |
|                                                     | <i>SNPlex technology</i>    | 2              | 2028        | 2030    | 1.051               | 0.929-1.189        | 0.432             | F     | 1.766                 | 0.184   | 43.37              | NA                |
|                                                     | <i>Other methods</i>        | 2              | 1022        | 904     | <b>1.267</b>        | <b>1.050-1.529</b> | <b>0.013</b>      | F     | 2.424                 | 0.120   | 58.74              | NA                |
|                                                     | <b>Source of controls</b>   |                |             |         |                     |                    |                   |       |                       |         |                    |                   |
|                                                     | <i>Population-based</i>     | 6              | 3710        | 4286    | 0.872               | 0.697-1.090        | 0.229             | R     | 22.72                 | < 0.001 | 77.99              | 0.159             |
|                                                     | <i>Hospital-based</i>       | 2              | 1670        | 1668    | 1.087               | 0.947-1.248        | 0.238             | F     | 0.642                 | 0.423   | 0.0                | NA                |
|                                                     | <b>HWE in controls</b>      |                |             |         |                     |                    |                   |       |                       |         |                    |                   |
|                                                     | <i>Equilibrium</i>          | 7              | 5154        | 5614    | 0.969               | 0.828-1.134        | 0.692             | R     | 18.54                 | 0.005   | 67.63              | 0.205             |
|                                                     | <i>Disequilibrium</i>       | 1              | 226         | 340     | <b>0.608</b>        | <b>0.420-0.880</b> | <b>0.008</b>      | F     | 0.0                   | 1.0     | 0.0                | NA                |
|                                                     | <b>Quality score</b>        |                |             |         |                     |                    |                   |       |                       |         |                    |                   |
|                                                     | <i>High quality</i>         | 4              | 3932        | 4510    | 0.988               | 0.902-1.083        | 0.796             | F     | 5.988                 | 0.112   | 49.90              | 0.140             |
|                                                     | <i>Low quality</i>          | 4              | 1448        | 1444    | 0.848               | 0.542-1.326        | 0.469             | R     | 19.62                 | < 0.001 | 84.71              | 0.140             |
| <b>Recessive model<br/>(GG versus TT+TG)</b>        | <b>Overall</b>              | 8              | 2690        | 2977    | 1.029               | 0.888-1.192        | 0.706             | F     | 7.459                 | 0.383   | 6.150              | 0.189             |
|                                                     | <b>Geographical region</b>  |                |             |         |                     |                    |                   |       |                       |         |                    |                   |
|                                                     | <i>Asian</i>                | 2              | 947         | 988     | 1.011               | 0.702-1.455        | 0.955             | F     | 0.344                 | 0.558   | 0.0                | NA                |
|                                                     | <i>European</i>             | 4              | 729         | 974     | 1.002               | 0.751-1.335        | 0.992             | F     | 3.678                 | 0.298   | 18.44              | 0.063             |
|                                                     | <i>American</i>             | 2              | 1014        | 1015    | 0.973               | 0.647-1.462        | 0.894             | R     | 3.363                 | 0.067   | 70.26              | NA                |
|                                                     | <b>Cancer type</b>          |                |             |         |                     |                    |                   |       |                       |         |                    |                   |
|                                                     | <i>Breast cancer</i>        | 2              | 1262        | 1246    | 1.103               | 0.840-1.449        | 0.481             | F     | 0.800                 | 0.371   | 0.0                | NA                |
|                                                     | <i>Larynx cancer</i>        | 2              | 213         | 270     | 0.585               | 0.285-1.201        | 0.144             | F     | 0.059                 | 0.809   | 0.0                | NA                |
|                                                     | <i>Bladder cancer</i>       | 1              | 737         | 737     | 1.163               | 0.929-1.457        | 0.187             | F     | 0.0                   | 1.0     | 0.0                | NA                |
|                                                     | <i>CLL</i>                  | 1              | 103         | 349     | 0.884               | 0.519-1.506        | 0.651             | F     | 0.0                   | 1.0     | 0.0                | NA                |
|                                                     | <i>Lung cancer</i>          | 1              | 98          | 97      | 1.415               | 0.433-4.623        | 0.565             | F     | 0.0                   | 1.0     | 0.0                | NA                |
|                                                     | <i>Renal cell carcinoma</i> | 1              | 277         | 278     | 0.764               | 0.518-1.127        | 0.175             | F     | 0.0                   | 1.0     | 0.0                | NA                |
|                                                     | <b>Genotyping method</b>    |                |             |         |                     |                    |                   |       |                       |         |                    |                   |
|                                                     | <i>TaqMan PCR</i>           | 4              | 1165        | 1510    | 0.875               | 0.658-1.164        | 0.359             | F     | 1.573                 | 0.665   | 0.0                | 0.042             |
|                                                     | <i>SNPlex technology</i>    | 2              | 1014        | 1015    | 0.973               | 0.647-1.462        | 0.894             | R     | 3.363                 | 0.067   | 70.26              | NA                |
|                                                     | <i>Other methods</i>        | 2              | 511         | 452     | 1.266               | 0.876-1.831        | 0.210             | F     | 0.038                 | 0.846   | 0.0                | NA                |
|                                                     | <b>Source of controls</b>   |                |             |         |                     |                    |                   |       |                       |         |                    |                   |
|                                                     | <i>Population-based</i>     | 6              | 1855        | 2143    | 0.927               | 0.761-1.130        | 0.454             | F     | 4.972                 | 0.419   | 0.0                | 0.214             |
|                                                     | <i>Hospital-based</i>       | 2              | 835         | 834     | 1.171               | 0.939-1.461        | 0.161             | F     | 0.102                 | 0.750   | 0.0                | NA                |
|                                                     | <b>HWE in controls</b>      |                |             |         |                     |                    |                   |       |                       |         |                    |                   |
|                                                     | <i>Equilibrium</i>          | 7              | 2577        | 2807    | 1.045               | 0.900-1.213        | 0.566             | F     | 5.720                 | 0.455   | 0.0                | 0.405             |
|                                                     | <i>Disequilibrium</i>       | 1              | 113         | 170     | 0.540               | 0.205-1.424        | 0.213             | F     | 0.0                   | 1.0     | 0.0                | NA                |
|                                                     | <b>Quality score</b>        |                |             |         |                     |                    |                   |       |                       |         |                    |                   |
|                                                     | <i>High quality</i>         | 4              | 1966        | 2255    | 1.017               | 0.862-1.199        | 0.845             | F     | 3.758                 | 0.289   | 20.17              | 0.187             |
|                                                     | <i>Low quality</i>          | 4              | 724         | 722     | 1.078               | 0.777-1.497        | 0.652             | F     | 3.602                 | 0.308   | 16.71              | 0.362             |
| <b>Dominant model<br/>(TG+GG versus TT)</b>         | <b>Overall</b>              | 8              | 2690        | 2977    | 0.984               | 0.861-1.124        | 0.814             | R     | 31.85                 | < 0.001 | 78.02              | 0.167             |
|                                                     | <b>Geographical region</b>  |                |             |         |                     |                    |                   |       |                       |         |                    |                   |
|                                                     | <i>Asian</i>                | 2              | 947         | 988     | 0.931               | 0.778-1.114        | 0.434             | F     | 0.321                 | 0.571   | 0.0                | NA                |
|                                                     | <i>European</i>             | 4              | 729         | 974     | 0.709               | 0.355-1.416        | 0.330             | R     | 29.65                 | < 0.001 | 89.88              | 0.035             |
|                                                     | <i>American</i>             | 2              | 1014        | 1015    | 1.093               | 0.888-1.345        | 0.403             | F     | 0.101                 | 0.751   | 0.0                | NA                |
|                                                     | <b>Cancer type</b>          |                |             |         |                     |                    |                   |       |                       |         |                    |                   |
|                                                     | <i>Breast cancer</i>        | 2              | 1262        | 1246    | 1.234               | 0.718-2.122        | 0.447             | R     | 9.527                 | 0.002   | 89.50              | NA                |
|                                                     | <i>Larynx cancer</i>        | 2              | 213         | 270     | <b>0.505</b>        | <b>0.349-0.729</b> | <b>&lt; 0.001</b> | F     | 0.017                 | 0.897   | 0.0                | NA                |
|                                                     | <i>Bladder cancer</i>       | 1              | 737         | 737     | 1.116               | 0.873-1.427        | 0.381             | F     | 0.0                   | 1.0     | 0.0                | NA                |
|                                                     | <i>CLL</i>                  | 1              | 103         | 349     | <b>0.551</b>        | <b>0.345-0.880</b> | <b>0.013</b>      | F     | 0.0                   | 1.0     | 0.0                | NA                |
|                                                     | <i>Lung cancer</i>          | 1              | 98          | 97      | 0.797               | 0.452-1.405        | 0.433             | F     | 0.0                   | 1.0     | 0.0                | NA                |
|                                                     | <i>Renal cell carcinoma</i> | 1              | 277         | 278     | 1.036               | 0.701-1.531        | 0.861             | F     | 0.0                   | 1.0     | 0.0                | NA                |
|                                                     | <b>Genotyping method</b>    |                |             |         |                     |                    |                   |       |                       |         |                    |                   |
|                                                     | <i>TaqMan PCR</i>           | 4              | 1165        | 1510    | <b>0.634</b>        | <b>0.426-0.942</b> | <b>0.024</b>      | R     | 11.53                 | 0.009   | 73.99              | 0.013             |
|                                                     | <i>SNPlex technology</i>    | 2              | 1014        | 1015    | 1.093               | 0.888-1.345        | 0.403             | F     | 0.101                 | 0.751   | 0.0                | NA                |
|                                                     | <i>Other methods</i>        | 2              | 511         | 452     | 1.195               | 0.589-2.423        | 0.622             | R     | 4.950                 | 0.026   | 79.80              | NA                |

|                                      |                      |   |      |      |              |                    |              |   |       |         |       |       |
|--------------------------------------|----------------------|---|------|------|--------------|--------------------|--------------|---|-------|---------|-------|-------|
| Homozygote model<br>(GG versus TT)   | Source of controls   |   |      |      |              |                    |              |   |       |         |       |       |
|                                      | Population-based     | 6 | 1855 | 2143 | 0.815        | 0.569-1.169        | 0.267        | R | 29.96 | < 0.001 | 83.31 | 0.282 |
|                                      | Hospital-based       | 2 | 835  | 834  | 1.058        | 0.845-1.326        | 0.622        | F | 1.141 | 0.285   | 12.39 | NA    |
|                                      | HWE in controls      |   |      |      |              |                    |              |   |       |         |       |       |
|                                      | Equilibrium          | 7 | 2577 | 2807 | 0.932        | 0.720-1.208        | 0.596        | R | 23.95 | 0.001   | 74.95 | 0.321 |
|                                      | Disequilibrium       | 1 | 113  | 170  | <b>0.494</b> | <b>0.305-0.802</b> | <b>0.004</b> | F | 0.0   | 1.0     | 0.0   | NA    |
|                                      | Quality score        |   |      |      |              |                    |              |   |       |         |       |       |
|                                      | High quality         | 4 | 1966 | 2255 | 0.930        | 0.741-1.168        | 0.534        | R | 7.002 | 0.072   | 57.15 | 0.482 |
|                                      | Low quality          | 4 | 724  | 722  | 0.778        | 0.401-1.513        | 0.460        | R | 24.77 | < 0.001 | 87.89 | 0.100 |
|                                      | Overall              | 8 | 1477 | 1598 | 0.986        | 0.775-1.254        | 0.907        | R | 15.76 | 0.027   | 55.59 | 0.114 |
|                                      | Geographical region  |   |      |      |              |                    |              |   |       |         |       |       |
|                                      | Asian                | 2 | 584  | 591  | 0.978        | 0.674-1.421        | 0.909        | F | 0.181 | 0.671   | 0.0   | NA    |
|                                      | European             | 4 | 384  | 491  | 0.707        | 0.329-1.519        | 0.374        | R | 13.48 | 0.004   | 77.75 | 0.129 |
|                                      | American             | 2 | 509  | 516  | 1.100        | 0.859-1.408        | 0.450        | F | 1.669 | 0.196   | 40.08 | NA    |
|                                      | Cancer type          |   |      |      |              |                    |              |   |       |         |       |       |
|                                      | Breast cancer        | 2 | 719  | 736  | 1.249        | 0.726-2.148        | 0.422        | R | 3.505 | 0.061   | 71.47 | NA    |
|                                      | Larynx cancer        | 2 | 124  | 122  | <b>0.415</b> | <b>0.197-0.876</b> | <b>0.021</b> | F | 0.062 | 0.803   | 0.0   | NA    |
|                                      | Bladder cancer       | 1 | 383  | 374  | 1.213        | 0.909-1.617        | 0.189        | F | 0.0   | 1.0     | 0.0   | NA    |
|                                      | CLL                  | 1 | 60   | 167  | 0.600        | 0.327-1.101        | 0.099        | F | 0.0   | 1.0     | 0.0   | NA    |
|                                      | Lung cancer          | 1 | 65   | 57   | 1.255        | 0.375-4.197        | 0.712        | F | 0.0   | 1.0     | 0.0   | NA    |
| Heterozygote model<br>(TG versus TT) | Renal cell carcinoma | 1 | 126  | 142  | 0.838        | 0.519-1.355        | 0.472        | F | 0.0   | 1.0     | 0.0   | NA    |
|                                      | Genotyping method    |   |      |      |              |                    |              |   |       |         |       |       |
|                                      | TaqMan PCR           | 4 | 703  | 823  | 0.743        | 0.550-1.004        | 0.053        | F | 4.422 | 0.219   | 32.15 | 0.056 |
|                                      | SNPlex technology    | 2 | 509  | 516  | 1.100        | 0.859-1.408        | 0.450        | F | 1.669 | 0.196   | 40.08 | NA    |
|                                      | Other methods        | 2 | 265  | 259  | <b>1.608</b> | <b>1.075-2.404</b> | <b>0.021</b> | F | 0.182 | 0.670   | 0.0   | NA    |
|                                      | Source of controls   |   |      |      |              |                    |              |   |       |         |       |       |
|                                      | Population-based     | 6 | 1029 | 1167 | 0.827        | 0.557-1.229        | 0.347        | R | 13.77 | 0.017   | 63.70 | 0.096 |
|                                      | Hospital-based       | 2 | 448  | 431  | 1.215        | 0.918-1.607        | 0.173        | F | 0.003 | 0.957   | 0.0   | NA    |
|                                      | HWE in controls      |   |      |      |              |                    |              |   |       |         |       |       |
|                                      | Equilibrium          | 7 | 1411 | 1521 | 1.007        | 0.765-1.325        | 0.963        | R | 11.83 | 0.066   | 49.28 | 0.274 |
|                                      | Disequilibrium       | 1 | 66   | 77   | 0.381        | 0.140-1.040        | 0.060        | F | 0.0   | 1.0     | 0.0   | NA    |
|                                      | Quality score        |   |      |      |              |                    |              |   |       |         |       |       |
|                                      | High quality         | 4 | 1088 | 1217 | 0.995        | 0.816-1.212        | 0.957        | F | 5.019 | 0.170   | 40.22 | 0.004 |
|                                      | Low quality          | 4 | 389  | 381  | 0.834        | 0.369-1.886        | 0.662        | R | 10.03 | 0.018   | 70.08 | 0.203 |
|                                      | Overall              | 8 | 2235 | 2477 | 0.974        | 0.847-1.120        | 0.716        | R | 28.60 | < 0.001 | 75.52 | 0.191 |
|                                      | Geographical region  |   |      |      |              |                    |              |   |       |         |       |       |
|                                      | Asian                | 2 | 886  | 925  | 0.923        | 0.766-1.113        | 0.403        | F | 0.596 | 0.440   | 0.0   | NA    |
|                                      | European             | 4 | 622  | 815  | 0.712        | 0.359-1.415        | 0.333        | R | 26.33 | < 0.001 | 88.61 | 0.032 |
|                                      | American             | 2 | 727  | 737  | 1.085        | 0.870-1.353        | 0.468        | F | 0.090 | 0.765   | 0.0   | NA    |
|                                      | Cancer type          |   |      |      |              |                    |              |   |       |         |       |       |
|                                      | Breast cancer        | 2 | 1135 | 1136 | 1.230        | 0.716-2.112        | 0.454        | R | 8.516 | 0.004   | 88.26 | NA    |
|                                      | Larynx cancer        | 2 | 201  | 245  | <b>0.520</b> | <b>0.356-0.760</b> | <b>0.001</b> | F | 0.005 | 0.942   | 0.0   | NA    |
|                                      | Bladder cancer       | 1 | 511  | 534  | 1.062        | 0.818-1.380        | 0.651        | F | 0.0   | 1.0     | 0.0   | NA    |
|                                      | CLL                  | 1 | 81   | 267  | <b>0.528</b> | <b>0.318-0.877</b> | <b>0.014</b> | F | 0.0   | 1.0     | 0.0   | NA    |
|                                      | Lung cancer          | 1 | 91   | 92   | 0.740        | 0.408-1.339        | 0.320        | F | 0.0   | 1.0     | 0.0   | NA    |
|                                      | Renal cell carcinoma | 1 | 216  | 203  | 1.144        | 0.758-1.729        | 0.521        | F | 0.0   | 1.0     | 0.0   | NA    |
|                                      | Genotyping method    |   |      |      |              |                    |              |   |       |         |       |       |
|                                      | TaqMan PCR           | 4 | 1077 | 1345 | <b>0.639</b> | <b>0.431-0.947</b> | <b>0.026</b> | R | 10.30 | 0.016   | 70.87 | 0.011 |
|                                      | SNPlex technology    | 2 | 727  | 737  | 1.085        | 0.870-1.353        | 0.468        | F | 0.090 | 0.765   | 0.0   | NA    |
|                                      | Other methods        | 2 | 431  | 395  | 1.149        | 0.528-2.504        | 0.726        | R | 5.429 | 0.020   | 81.58 | NA    |
|                                      | Source of controls   |   |      |      |              |                    |              |   |       |         |       |       |
|                                      | Population-based     | 6 | 1633 | 1851 | 0.833        | 0.580-1.197        | 0.323        | R | 27.27 | < 0.001 | 81.67 | 0.327 |
|                                      | Hospital-based       | 2 | 602  | 626  | 1.002        | 0.788-1.272        | 0.990        | F | 1.195 | 0.274   | 16.33 | NA    |
|                                      | HWE in controls      |   |      |      |              |                    |              |   |       |         |       |       |
|                                      | Equilibrium          | 7 | 2128 | 2323 | 0.930        | 0.715-1.209        | 0.588        | R | 22.16 | 0.001   | 72.92 | 0.348 |
|                                      | Disequilibrium       | 1 | 107  | 154  | 0.514        | 0.312-0.847        | 0.009        | F | 0.0   | 1.0     | 0.0   | NA    |
|                                      | Quality score        |   |      |      |              |                    |              |   |       |         |       |       |
|                                      | High quality         | 4 | 1603 | 1837 | 0.932        | 0.738-1.179        | 0.558        | R | 6.622 | 0.085   | 54.69 | 0.570 |
|                                      | Low quality          | 4 | 632  | 640  | 0.777        | 0.404-1.491        | 0.447        | R | 21.94 | < 0.001 | 86.33 | 0.088 |

OR: odds ratio, CI: confidence interval, F: fixed model, R: random model, NA: not appreciable

Supplementary Table S11. Meta-analysis of the association between **XPO5 (T > G; rs11077)** variant and cancer risk.

| Comparison                                  | Subgroups                     | No. of studies | Sample size |         | Test of association |             |         |       | Test of heterogeneity |         |                    | Publication bias  |
|---------------------------------------------|-------------------------------|----------------|-------------|---------|---------------------|-------------|---------|-------|-----------------------|---------|--------------------|-------------------|
|                                             |                               |                | Cancer      | Control | OR                  | 95% CI      | P-value | Model | Q test                | P-value | I <sup>2</sup> (%) | P-value (Egger's) |
| Allelic model<br>(G allele versus T allele) | Overall                       | 13             | 7804        | 9076    | 1.018               | 0.939-1.105 | 0.660   | R     | 35.72                 | < 0.001 | 66.40              | 0.646             |
|                                             | Geographical region           |                |             |         |                     |             |         |       |                       |         |                    |                   |
|                                             | Asian                         | 9              | 5212        | 5692    | 1.168               | 1.032-1.322 | 0.014   | F     | 8.230                 | 0.411   | 2.794              | 0.083             |
|                                             | European                      | 1              | 248         | 320     | 0.458               | 0.326-0.643 | < 0.001 | F     | 0.0                   | 1.0     | 0.0                | NA                |
|                                             | American                      | 3              | 2344        | 3064    | 1.003               | 0.897-1.122 | 0.958   | F     | 1.440                 | 0.487   | 0.0                | 0.389             |
|                                             | Cancer type                   |                |             |         |                     |             |         |       |                       |         |                    |                   |
|                                             | PTC                           | 2              | 2508        | 2716    | 1.282               | 1.081-1.519 | 0.004   | F     | 0.285                 | 0.593   | 0.0                | NA                |
|                                             | Colorectal cancer             | 2              | 1142        | 1084    | 1.098               | 0.810-1.488 | 0.548   | F     | 0.442                 | 0.506   | 0.0                | NA                |
|                                             | Bladder cancer                | 1              | 1436        | 1452    | 0.954               | 0.823-1.107 | 0.535   | F     | 0.0                   | 1.0     | 0.0                | NA                |
|                                             | Cervical precancerous lesions | 1              | 592         | 592     | 1.445               | 0.885-2.358 | 0.141   | F     | 0.0                   | 1.0     | 0.0                | NA                |
|                                             | Gastric cancer                | 1              | 274         | 284     | 0.984               | 0.513-1.886 | 0.960   | F     | 0.0                   | 1.0     | 0.0                | NA                |
|                                             | HCC                           | 1              | 294         | 418     | 0.653               | 0.370-1.152 | 0.141   | F     | 0.0                   | 1.0     | 0.0                | NA                |
|                                             | Hodgkin lymphoma              | 1              | 202         | 400     | 1.091               | 0.773-1.540 | 0.621   | F     | 0.0                   | 1.0     | 0.0                | NA                |
|                                             | Larynx cancer                 | 1              | 248         | 320     | 0.458               | 0.326-0.643 | < 0.001 | F     | 0.0                   | 1.0     | 0.0                | NA                |
|                                             | Lung cancer                   | 1              | 200         | 198     | 0.779               | 0.355-1.709 | 0.533   | F     | 0.0                   | 1.0     | 0.0                | NA                |
|                                             | NHL                           | 1              | 356         | 1058    | 1.011               | 0.793-1.289 | 0.931   | F     | 0.0                   | 1.0     | 0.0                | NA                |
|                                             | Renal cell carcinoma          | 1              | 552         | 554     | 1.133               | 0.892-1.438 | 0.305   | F     | 0.0                   | 1.0     | 0.0                | NA                |
|                                             | Genotyping method             |                |             |         |                     |             |         |       |                       |         |                    |                   |
|                                             | TaqMan PCR                    | 3              | 2718        | 3176    | 0.863               | 0.475-1.567 | 0.628   | R     | 25.74                 | < 0.001 | 92.23              | 0.502             |
|                                             | RFLP-PCR                      | 3              | 1350        | 1478    | 1.080               | 0.743-1.570 | 0.687   | R     | 4.944                 | 0.084   | 59.55              | 0.258             |
|                                             | PCR-ligase detection          | 2              | 600         | 568     | 0.944               | 0.600-1.488 | 0.805   | F     | 0.029                 | 0.865   | 0.0                | NA                |
|                                             | SNPlex technology             | 2              | 1988        | 2006    | 1.001               | 0.882-1.135 | 0.989   | F     | 1.435                 | 0.231   | 30.32              | NA                |
|                                             | Other methods                 | 3              | 1148        | 1848    | 1.059               | 0.859-1.307 | 0.590   | F     | 2.272                 | 0.321   | 11.96              | 0.947             |
|                                             | Source of controls            |                |             |         |                     |             |         |       |                       |         |                    |                   |
|                                             | Population-based              | 8              | 2728        | 3112    | 0.956               | 0.710-1.286 | 0.764   | R     | 29.26                 | < 0.001 | 76.07              | 0.790             |
|                                             | Hospital-based                | 5              | 5076        | 5964    | 1.051               | 0.950-1.161 | 0.335   | F     | 5.724                 | 0.221   | 30.12              | 0.997             |
|                                             | HWE in controls               |                |             |         |                     |             |         |       |                       |         |                    |                   |
|                                             | Equilibrium                   | 10             | 6804        | 8004    | 1.070               | 0.979-1.170 | 0.135   | F     | 12.02                 | 0.212   | 25.15              | 0.846             |
|                                             | Disequilibrium                | 3              | 1000        | 1072    | 0.741               | 0.375-1.464 | 0.388   | R     | 18.33                 | < 0.001 | 89.09              | 0.740             |
|                                             | Quality score                 |                |             |         |                     |             |         |       |                       |         |                    |                   |
|                                             | High quality                  | 8              | 6554        | 7590    | 1.082               | 0.991-1.181 | 0.077   | F     | 11.85                 | 0.106   | 40.92              | 0.604             |
|                                             | Low quality                   | 5              | 1250        | 1486    | 0.794               | 0.523-1.205 | 0.278   | R     | 13.67                 | 0.008   | 70.74              | 0.660             |
| Recessive model<br>(GG versus TT+TG)        | Overall                       | 13             | 3902        | 4538    | 0.980               | 0.797-1.204 | 0.846   | R     | 38.19                 | < 0.001 | 68.58              | 0.849             |
|                                             | Geographical region           |                |             |         |                     |             |         |       |                       |         |                    |                   |
|                                             | Asian                         | 9              | 2606        | 2846    | 1.439               | 1.007-2.056 | 0.045   | F     | 4.373                 | 0.822   | 0.0                | 0.035             |
|                                             | European                      | 1              | 124         | 160     | 0.252               | 0.148-0.430 | < 0.001 | F     | 0.0                   | 1.0     | 0.0                | NA                |
|                                             | American                      | 3              | 1172        | 1532    | 1.091               | 0.886-1.345 | 0.412   | F     | 3.411                 | 0.182   | 41.36              | NA                |
|                                             | Cancer type                   |                |             |         |                     |             |         |       |                       |         |                    |                   |
|                                             | PTC                           | 2              | 1254        | 1358    | 1.700               | 1.053-2.742 | 0.030   | F     | 0.001                 | 0.975   | 0.0                | NA                |
|                                             | Colorectal cancer             | 2              | 571         | 542     | 0.626               | 0.102-3.858 | 0.613   | F     | 0.095                 | 0.759   | 0.0                | NA                |
|                                             | Bladder cancer                | 1              | 718         | 726     | 0.934               | 0.707-1.235 | 0.634   | F     | 0.0                   | 1.0     | 0.0                | NA                |
|                                             | Cervical precancerous lesions | 1              | 296         | 296     | 2.007               | 0.181-22.25 | 0.570   | F     | 0.0                   | 1.0     | 0.0                | NA                |
|                                             | Gastric cancer                | 1              | 137         | 142     | 1.037               | 0.064-16.74 | 0.980   | F     | 0.0                   | 1.0     | 0.0                | NA                |
|                                             | HCC                           | 1              | 147         | 209     | 0.471               | 0.019-11.65 | 0.646   | F     | 0.0                   | 1.0     | 0.0                | NA                |
|                                             | Hodgkin lymphoma              | 1              | 101         | 200     | 1.378               | 0.748-2.540 | 0.304   | F     | 0.0                   | 1.0     | 0.0                | NA                |
|                                             | Larynx cancer                 | 1              | 124         | 160     | 0.252               | 0.148-0.430 | < 0.001 | F     | 0.0                   | 1.0     | 0.0                | NA                |
|                                             | Lung cancer                   | 1              | 100         | 99      | 0.137               | 0.007-2.691 | 0.191   | F     | 0.0                   | 1.0     | 0.0                | NA                |
|                                             | NHL                           | 1              | 178         | 529     | 1.167               | 0.754-1.808 | 0.488   | F     | 0.0                   | 1.0     | 0.0                | NA                |
|                                             | Renal cell carcinoma          | 1              | 276         | 277     | 1.530               | 0.972-2.408 | 0.066   | F     | 0.0                   | 1.0     | 0.0                | NA                |
|                                             | Genotyping method             |                |             |         |                     |             |         |       |                       |         |                    |                   |
|                                             | TaqMan PCR                    | 3              | 1359        | 1588    | 0.822               | 0.234-2.881 | 0.759   | R     | 23.89                 | < 0.001 | 91.63              | 0.376             |
|                                             | RFLP-PCR                      | 3              | 675         | 739     | 1.521               | 0.847-2.731 | 0.160   | F     | 1.508                 | 0.470   | 0.0                | 0.113             |
|                                             | PCR-ligase detection          | 2              | 300         | 284     | 0.950               | 0.133-6.789 | 0.959   | F     | 0.008                 | 0.931   | 0.0                | NA                |
|                                             | SNPlex technology             | 2              | 994         | 1003    | 1.156               | 0.716-1.866 | 0.553   | R     | 3.293                 | 0.070   | 69.63              | NA                |
|                                             | Other methods                 | 3              | 574         | 924     | 1.136               | 0.742-1.740 | 0.557   | F     | 2.168                 | 0.338   | 7.738              | 0.683             |
|                                             | Source of controls            |                |             |         |                     |             |         |       |                       |         |                    |                   |
|                                             | Population-based              | 8              | 1364        | 1556    | 0.987               | 0.471-2.067 | 0.972   | R     | 33.57                 | < 0.001 | 79.15              | 0.975             |
|                                             | Hospital-based                | 5              | 2538        | 2982    | 1.024               | 0.819-1.281 | 0.832   | F     | 4.506                 | 0.342   | 11.23              | 0.691             |
|                                             | HWE in controls               |                |             |         |                     |             |         |       |                       |         |                    |                   |
|                                             | Equilibrium                   | 10             | 3402        | 4002    | 1.124               | 0.923-1.369 | 0.244   | F     | 6.010                 | 0.739   | 0.0                | 0.609             |
|                                             | Disequilibrium                | 3              | 500         | 536     | 0.482               | 0.099-2.347 | 0.366   | R     | 26.70                 | < 0.001 | 92.51              | 0.780             |
|                                             | Quality score                 |                |             |         |                     |             |         |       |                       |         |                    |                   |
|                                             | High quality                  | 8              | 3277        | 3795    | 1.165               | 0.964-1.409 | 0.114   | F     | 7.184                 | 0.410   | 2.557              | 0.594             |
|                                             | Low quality                   | 5              | 625         | 743     | 0.561               | 0.173-1.817 | 0.335   | R     | 17.99                 | 0.001   | 77.77              | 0.921             |
| Dominant model<br>(TG+GG versus TT)         | Overall                       | 13             | 3902        | 4538    | 1.047               | 0.943-1.163 | 0.386   | F     | 12.81                 | 0.383   | 6.307              | 0.343             |
|                                             | Geographical region           |                |             |         |                     |             |         |       |                       |         |                    |                   |
|                                             | Asian                         | 9              | 2606        | 2846    | 1.158               | 1.006-1.332 | 0.041   | F     | 6.648                 | 0.575   | 0.0                | 0.136             |

|                                          |                                      |    |      |      |              |                    |                   |   |       |         |       |       |
|------------------------------------------|--------------------------------------|----|------|------|--------------|--------------------|-------------------|---|-------|---------|-------|-------|
|                                          | <i>European</i>                      | 1  | 124  | 160  | 0.660        | 0.384-1.134        | 0.132             | F | 0.0   | 1.0     | 0.0   | NA    |
|                                          | <i>American</i>                      | 3  | 1172 | 1532 | 0.953        | 0.808-1.123        | 0.563             | F | 0.145 | 0.930   | 0.0   | 0.730 |
|                                          | <i>Cancer type</i>                   |    |      |      |              |                    |                   |   |       |         |       |       |
|                                          | <i>PTC</i>                           | 2  | 1254 | 1358 | <b>1.262</b> | <b>1.040-1.531</b> | <b>0.018</b>      | F | 0.067 | 0.796   | 0.0   | NA    |
|                                          | <i>Colorectal cancer</i>             | 2  | 571  | 542  | 1.128        | 0.817-1.558        | 0.464             | F | 0.534 | 0.465   | 0.0   | NA    |
|                                          | <i>Bladder cancer</i>                | 1  | 718  | 726  | 0.942        | 0.757-1.171        | 0.589             | F | 0.0   | 1.0     | 0.0   | NA    |
|                                          | <i>Cervical precancerous lesions</i> | 1  | 296  | 296  | 1.452        | 0.868-2.430        | 0.155             | F | 0.0   | 1.0     | 0.0   | NA    |
|                                          | <i>Gastric cancer</i>                | 1  | 137  | 142  | 0.979        | 0.490-1.957        | 0.953             | F | 0.0   | 1.0     | 0.0   | NA    |
|                                          | <i>HCC</i>                           | 1  | 147  | 209  | 0.647        | 0.357-1.172        | 0.151             | F | 0.0   | 1.0     | 0.0   | NA    |
|                                          | <i>Hodgkin lymphoma</i>              | 1  | 101  | 200  | 0.974        | 0.596-1.594        | 0.918             | F | 0.0   | 1.0     | 0.0   | NA    |
|                                          | <i>Larynx cancer</i>                 | 1  | 124  | 160  | 0.660        | 0.384-1.134        | 0.132             | F | 0.0   | 1.0     | 0.0   | NA    |
|                                          | <i>Lung cancer</i>                   | 1  | 100  | 99   | 0.989        | 0.421-2.321        | 0.979             | F | 0.0   | 1.0     | 0.0   | NA    |
|                                          | <i>NHL</i>                           | 1  | 178  | 529  | 0.925        | 0.647-1.323        | 0.669             | F | 0.0   | 1.0     | 0.0   | NA    |
|                                          | <i>Renal cell carcinoma</i>          | 1  | 276  | 277  | 1.011        | 0.707-1.446        | 0.951             | F | 0.0   | 1.0     | 0.0   | NA    |
|                                          | <i>Genotyping method</i>             |    |      |      |              |                    |                   |   |       |         |       |       |
|                                          | <i>TaqMan PCR</i>                    | 3  | 1359 | 1588 | 0.992        | 0.686-1.435        | 0.967             | R | 5.016 | 0.081   | 60.12 | 0.249 |
|                                          | <i>RFLP-PCR</i>                      | 3  | 675  | 739  | 1.096        | 0.840-1.430        | 0.499             | F | 3.892 | 0.143   | 48.61 | 0.548 |
|                                          | <i>PCR-ligase detection</i>          | 2  | 300  | 284  | 0.941        | 0.581-1.524        | 0.803             | F | 0.025 | 0.874   | 0.0   | NA    |
|                                          | <i>SNPlex technology</i>             | 2  | 994  | 1003 | 0.960        | 0.797-1.157        | 0.668             | F | 0.112 | 0.738   | 0.0   | NA    |
|                                          | <i>Other methods</i>                 | 3  | 574  | 924  | 1.062        | 0.805-1.402        | 0.670             | F | 2.022 | 0.364   | 1.097 | 0.778 |
|                                          | <i>Source of controls</i>            |    |      |      |              |                    |                   |   |       |         |       |       |
|                                          | <i>Population-based</i>              | 8  | 1364 | 1556 | 0.988        | 0.823-1.185        | 0.894             | F | 7.730 | 0.357   | 9.446 | 0.551 |
|                                          | <i>Hospital-based</i>                | 5  | 2538 | 2982 | 1.079        | 0.949-1.227        | 0.249             | F | 4.479 | 0.345   | 10.69 | 0.793 |
|                                          | <i>HWE in controls</i>               |    |      |      |              |                    |                   |   |       |         |       |       |
|                                          | <i>Equilibrium</i>                   | 10 | 3402 | 4002 | 1.074        | 0.959-1.202        | 0.218             | F | 9.774 | 0.369   | 7.916 | 0.605 |
|                                          | <i>Disequilibrium</i>                | 3  | 500  | 536  | 0.899        | 0.678-1.191        | 0.458             | F | 1.718 | 0.424   | 0.0   | 0.776 |
|                                          | <i>Quality score</i>                 |    |      |      |              |                    |                   |   |       |         |       |       |
|                                          | <i>High quality</i>                  | 8  | 3277 | 3795 | 1.081        | 0.965-1.211        | 0.181             | F | 9.404 | 0.225   | 25.57 | 0.853 |
|                                          | <i>Low quality</i>                   | 5  | 625  | 743  | 0.872        | 0.663-1.149        | 0.331             | F | 1.417 | 0.841   | 0.0   | 0.620 |
| <b>Homozygote model (GG versus TT)</b>   | <b>Overall</b>                       | 13 | 2795 | 3209 | 1.015        | 0.830-1.242        | 0.882             | R | 24.05 | 0.020   | 50.11 | 0.789 |
|                                          | <i>Geographical region</i>           |    |      |      |              |                    |                   |   |       |         |       |       |
|                                          | <i>Asian</i>                         | 9  | 2133 | 2339 | 1.435        | 0.983-2.097        | 0.062             | F | 4.678 | 0.791   | 0.0   | 0.043 |
|                                          | <i>European</i>                      | 1  | 62   | 116  | <b>0.299</b> | <b>0.157-0.570</b> | <b>&lt; 0.001</b> | F | 0.0   | 1.0     | 0.0   | NA    |
|                                          | <i>American</i>                      | 3  | 600  | 754  | 1.040        | 0.823-1.313        | 0.743             | F | 2.305 | 0.316   | 13.21 | 0.309 |
|                                          | <i>Cancer type</i>                   |    |      |      |              |                    |                   |   |       |         |       |       |
|                                          | <i>PTC</i>                           | 2  | 1000 | 1114 | <b>1.784</b> | <b>1.078-2.953</b> | <b>0.024</b>      | F | 0.006 | 0.937   | 0.0   | NA    |
|                                          | <i>Colorectal cancer</i>             | 2  | 478  | 463  | 0.635        | 0.103-3.917        | 0.625             | F | 0.080 | 0.777   | 0.0   | NA    |
|                                          | <i>Bladder cancer</i>                | 1  | 362  | 363  | 0.908        | 0.665-1.239        | 0.543             | F | 0.0   | 1.0     | 0.0   | NA    |
|                                          | <i>Cervical precancerous lesions</i> | 1  | 259  | 269  | 2.086        | 0.188-23.14        | 0.549             | F | 0.0   | 1.0     | 0.0   | NA    |
|                                          | <i>Gastric cancer</i>                | 1  | 120  | 124  | 1.034        | 0.064-16.71        | 0.981             | F | 0.0   | 1.0     | 0.0   | NA    |
|                                          | <i>HCC</i>                           | 1  | 128  | 171  | 0.442        | 0.018-10.95        | 0.618             | F | 0.0   | 1.0     | 0.0   | NA    |
|                                          | <i>Hodgkin lymphoma</i>              | 1  | 60   | 108  | 1.279        | 0.653-2.505        | 0.473             | F | 0.0   | 1.0     | 0.0   | NA    |
|                                          | <i>Larynx cancer</i>                 | 1  | 62   | 116  | <b>0.299</b> | <b>0.157-0.570</b> | <b>&lt; 0.001</b> | F | 0.0   | 1.0     | 0.0   | NA    |
|                                          | <i>Lung cancer</i>                   | 1  | 88   | 90   | 0.141        | 0.007-2.775        | 0.198             | F | 0.0   | 1.0     | 0.0   | NA    |
|                                          | <i>NHL</i>                           | 1  | 96   | 264  | 1.078        | 0.661-1.760        | 0.763             | F | 0.0   | 1.0     | 0.0   | NA    |
|                                          | <i>Renal cell carcinoma</i>          | 1  | 142  | 127  | 1.437        | 0.864-2.391        | 0.163             | F | 0.0   | 1.0     | 0.0   | NA    |
|                                          | <i>Genotyping method</i>             |    |      |      |              |                    |                   |   |       |         |       |       |
|                                          | <i>TaqMan PCR</i>                    | 3  | 1046 | 1258 | 0.863        | 0.291-2.560        | 0.791             | R | 14.82 | 0.001   | 86.50 | 0.423 |
|                                          | <i>RFLP-PCR</i>                      | 3  | 538  | 590  | 1.573        | 0.835-2.964        | 0.161             | F | 1.631 | 0.442   | 0.0   | 0.094 |
|                                          | <i>PCR-ligase detection</i>          | 2  | 264  | 248  | 0.943        | 0.132-6.745        | 0.953             | F | 0.008 | 0.927   | 0.0   | NA    |
|                                          | <i>SNPlex technology</i>             | 2  | 504  | 490  | 1.029        | 0.789-1.341        | 0.835             | F | 2.277 | 0.131   | 56.08 | NA    |
|                                          | <i>Other methods</i>                 | 3  | 443  | 623  | 1.051        | 0.654-1.688        | 0.838             | F | 2.067 | 0.356   | 3.241 | 0.731 |
|                                          | <i>Source of controls</i>            |    |      |      |              |                    |                   |   |       |         |       |       |
|                                          | <i>Population-based</i>              | 8  | 991  | 1119 | 1.011        | 0.543-1.883        | 0.973             | R | 19.55 | 0.007   | 64.20 | 0.907 |
|                                          | <i>Hospital-based</i>                | 5  | 1804 | 2090 | 0.996        | 0.779-1.274        | 0.973             | F | 4.461 | 0.347   | 10.34 | 0.701 |
|                                          | <i>HWE in controls</i>               |    |      |      |              |                    |                   |   |       |         |       |       |
|                                          | <i>Equilibrium</i>                   | 10 | 2503 | 2876 | 1.101        | 0.887-1.367        | 0.384             | F | 6.217 | 0.718   | 0.0   | 0.616 |
|                                          | <i>Disequilibrium</i>                | 3  | 292  | 333  | 0.528        | 0.131-2.131        | 0.370             | R | 15.29 | < 0.001 | 86.92 | 0.687 |
|                                          | <i>Quality score</i>                 |    |      |      |              |                    |                   |   |       |         |       |       |
|                                          | <i>High quality</i>                  | 8  | 2321 | 2647 | 1.137        | 0.922-1.402        | 0.230             | F | 6.956 | 0.434   | 0.0   | 0.572 |
|                                          | <i>Low quality</i>                   | 5  | 474  | 562  | 0.588        | 0.219-1.577        | 0.291             | R | 10.46 | 0.033   | 61.76 | 0.955 |
| <b>Heterozygote model (TG versus TT)</b> | <b>Overall</b>                       | 13 | 3600 | 4133 | 1.051        | 0.942-1.173        | 0.371             | F | 9.956 | 0.620   | 0.0   | 0.692 |
|                                          | <i>Geographical region</i>           |    |      |      |              |                    |                   |   |       |         |       |       |
|                                          | <i>Asian</i>                         | 9  | 2532 | 2772 | 1.134        | 0.980-1.311        | 0.090             | F | 6.105 | 0.635   | 0.0   | 0.213 |
|                                          | <i>European</i>                      | 1  | 98   | 78   | 1.331        | 0.725-2.443        | 0.356             | F | 0.0   | 1.0     | 0.0   | NA    |
|                                          | <i>American</i>                      | 3  | 970  | 1283 | 0.925        | 0.777-1.101        | 0.381             | F | 0.167 | 0.920   | 0.0   | 0.181 |
|                                          | <i>Cancer type</i>                   |    |      |      |              |                    |                   |   |       |         |       |       |
|                                          | <i>PTC</i>                           | 2  | 1206 | 1325 | 1.210        | 0.990-1.478        | 0.063             | F | 0.058 | 0.810   | 0.0   | NA    |
|                                          | <i>Colorectal cancer</i>             | 2  | 569  | 539  | 1.147        | 0.827-1.590        | 0.411             | F | 0.572 | 0.450   | 0.0   | NA    |
|                                          | <i>Bladder cancer</i>                | 1  | 604  | 604  | 0.953        | 0.757-1.199        | 0.682             | F | 0.0   | 1.0     | 0.0   | NA    |

|                                      |    |      |      |       |             |       |   |       |       |       |       |
|--------------------------------------|----|------|------|-------|-------------|-------|---|-------|-------|-------|-------|
| <i>Cervical precancerous lesions</i> | 1  | 294  | 295  | 1.429 | 0.846-2.415 | 0.182 | F | 0.0   | 1.0   | 0.0   | NA    |
| <i>Gastric cancer</i>                | 1  | 136  | 141  | 0.976 | 0.480-1.984 | 0.947 | F | 0.0   | 1.0   | 0.0   | NA    |
| <i>HCC</i>                           | 1  | 147  | 208  | 0.664 | 0.366-1.206 | 0.179 | F | 0.0   | 1.0   | 0.0   | NA    |
| <i>Hodgkin lymphoma</i>              | 1  | 80   | 168  | 0.868 | 0.509-1.480 | 0.604 | F | 0.0   | 1.0   | 0.0   | NA    |
| <i>Larynx cancer</i>                 | 1  | 98   | 78   | 1.331 | 0.725-2.443 | 0.356 | F | 0.0   | 1.0   | 0.0   | NA    |
| <i>Lung cancer</i>                   | 1  | 100  | 96   | 1.318 | 0.529-3.287 | 0.553 | F | 0.0   | 1.0   | 0.0   | NA    |
| <i>NHL</i>                           | 1  | 144  | 440  | 0.873 | 0.597-1.279 | 0.486 | F | 0.0   | 1.0   | 0.0   | NA    |
| <i>Renal cell carcinoma</i>          | 1  | 222  | 239  | 0.903 | 0.621-1.315 | 0.596 | F | 0.0   | 1.0   | 0.0   | NA    |
| <i>Genotyping method</i>             |    |      |      |       |             |       |   |       |       |       |       |
| <i>TaqMan PCR</i>                    | 3  | 1295 | 1463 | 1.179 | 0.976-1.425 | 0.087 | F | 1.516 | 0.469 | 0.0   | 0.710 |
| <i>RFLP-PCR</i>                      | 3  | 643  | 714  | 1.057 | 0.803-1.392 | 0.691 | F | 3.017 | 0.221 | 33.71 | 0.456 |
| <i>PCR-ligase detection</i>          | 2  | 298  | 282  | 0.940 | 0.574-1.541 | 0.807 | F | 0.021 | 0.886 | 0.0   | NA    |
| <i>SNPlex technology</i>             | 2  | 826  | 843  | 0.939 | 0.772-1.143 | 0.531 | F | 0.056 | 0.812 | 0.0   | NA    |
| <i>Other methods</i>                 | 3  | 538  | 831  | 1.061 | 0.792-1.421 | 0.690 | F | 2.455 | 0.293 | 18.53 | 0.532 |
| <i>Source of controls</i>            |    |      |      |       |             |       |   |       |       |       |       |
| <i>Population-based</i>              | 8  | 1228 | 1378 | 0.995 | 0.821-1.206 | 0.956 | F | 5.256 | 0.629 | 0.0   | 0.835 |
| <i>Hospital-based</i>                | 5  | 2372 | 2755 | 1.080 | 0.945-1.234 | 0.259 | F | 4.225 | 0.376 | 5.315 | 0.953 |
| <i>HWE in controls</i>               |    |      |      |       |             |       |   |       |       |       |       |
| <i>Equilibrium</i>                   | 10 | 3180 | 3720 | 1.054 | 0.937-1.186 | 0.383 | F | 8.515 | 0.483 | 0.0   | 0.401 |
| <i>Disequilibrium</i>                | 3  | 420  | 413  | 1.036 | 0.766-1.400 | 0.819 | F | 1.430 | 0.489 | 0.0   | 0.324 |
| <i>Quality score</i>                 |    |      |      |       |             |       |   |       |       |       |       |
| <i>High quality</i>                  | 8  | 3024 | 3509 | 1.055 | 0.937-1.187 | 0.378 | F | 8.430 | 0.296 | 16.96 | 0.605 |
| <i>Low quality</i>                   | 5  | 576  | 624  | 1.032 | 0.768-1.385 | 0.836 | F | 1.508 | 0.825 | 0.0   | 0.475 |

OR: odds ratio, CI: confidence interval, F: fixed model, R: random model, NA: not appreciable



Supplementary Table S12. Meta-analysis of the association between **RAN (C > T; rs14035)** variant and cancer risk.

| Comparison                                  | Subgroups                     | No. of studies | Sample size |         | Test of association |             |         |       | Test of heterogeneity |         |                    | Publication bias  |
|---------------------------------------------|-------------------------------|----------------|-------------|---------|---------------------|-------------|---------|-------|-----------------------|---------|--------------------|-------------------|
|                                             |                               |                | Cancer      | Control | OR                  | 95% CI      | P-value | Model | Q test                | P-value | I <sup>2</sup> (%) | P-value (Egger's) |
| Allelic model<br>(T allele versus C allele) | Overall                       | 12             | 7486        | 9800    | 0.940               | 0.854-1.034 | 0.203   | R     | 29.96                 | 0.002   | 63.29              | 0.273             |
|                                             | Geographical region           |                |             |         |                     |             |         |       |                       |         |                    |                   |
|                                             | Asian                         | 7              | 4686        | 5698    | 0.991               | 0.843-1.164 | 0.909   | R     | 14.28                 | 0.027   | 57.98              | 0.456             |
|                                             | European                      | 2              | 418         | 1024    | 0.624               | 0.373-1.046 | 0.074   | R     | 3.819                 | 0.051   | 73.81              | NA                |
|                                             | American                      | 3              | 2382        | 3078    | 0.932               | 0.828-1.049 | 0.245   | F     | 2.081                 | 0.353   | 3.907              | 0.676             |
|                                             | Cancer type                   |                |             |         |                     |             |         |       |                       |         |                    |                   |
|                                             | Bladder cancer                | 1              | 1470        | 1464    | 0.898               | 0.769-1.050 | 0.178   | F     | 0.0                   | 1.0     | 0.0                | NA                |
|                                             | Cervical precancerous lesions | 1              | 590         | 592     | 0.885               | 0.666-1.176 | 0.400   | F     | 0.0                   | 1.0     | 0.0                | NA                |
|                                             | CLL                           | 1              | 198         | 684     | 0.803               | 0.572-1.128 | 0.206   | F     | 0.0                   | 1.0     | 0.0                | NA                |
|                                             | Colorectal cancer             | 1              | 816         | 800     | 0.779               | 0.612-0.991 | 0.042   | F     | 0.0                   | 1.0     | 0.0                | NA                |
|                                             | HCC                           | 1              | 294         | 418     | 1.076               | 0.733-1.579 | 0.708   | F     | 0.0                   | 1.0     | 0.0                | NA                |
|                                             | Larynx cancer                 | 1              | 220         | 340     | 0.474               | 0.316-0.711 | < 0.001 | F     | 0.0                   | 1.0     | 0.0                | NA                |
|                                             | Lung cancer                   | 1              | 186         | 180     | 0.687               | 0.413-1.143 | 0.148   | F     | 0.0                   | 1.0     | 0.0                | NA                |
|                                             | Neuroblastoma                 | 1              | 858         | 1768    | 0.964               | 0.779-1.191 | 0.732   | F     | 0.0                   | 1.0     | 0.0                | NA                |
|                                             | NHL                           | 1              | 360         | 1058    | 1.101               | 0.852-1.422 | 0.464   | F     | 0.0                   | 1.0     | 0.0                | NA                |
|                                             | Oral cancer                   | 1              | 878         | 876     | 1.266               | 0.996-1.609 | 0.054   | F     | 0.0                   | 1.0     | 0.0                | NA                |
|                                             | Primary liver cancer          | 1              | 1064        | 1064    | 1.237               | 0.986-1.551 | 0.066   | F     | 0.0                   | 1.0     | 0.0                | NA                |
|                                             | Renal cell carcinoma          | 1              | 552         | 556     | 0.872               | 0.674-1.129 | 0.299   | F     | 0.0                   | 1.0     | 0.0                | NA                |
|                                             | Genotyping method             |                |             |         |                     |             |         |       |                       |         |                    |                   |
|                                             | TaqMan PCR                    | 4              | 2154        | 3668    | 0.851               | 0.601-1.205 | 0.363   | R     | 17.77                 | < 0.001 | 83.11              | 0.199             |
|                                             | RFLP-PCR                      | 3              | 2174        | 2282    | 1.008               | 0.739-1.376 | 0.958   | R     | 7.667                 | 0.022   | 73.91              | 0.991             |
|                                             | SNPlex technology             | 2              | 2022        | 2020    | 0.891               | 0.780-1.019 | 0.091   | F     | 0.037                 | 0.847   | 0.0                | NA                |
|                                             | Other methods                 | 3              | 1136        | 1830    | 0.953               | 0.798-1.140 | 0.600   | F     | 3.056                 | 0.217   | 34.55              | 0.335             |
|                                             | Source of controls            |                |             |         |                     |             |         |       |                       |         |                    |                   |
|                                             | Population-based              | 6              | 2918        | 3654    | 0.874               | 0.689-1.110 | 0.270   | R     | 18.35                 | 0.003   | 72.76              | 0.130             |
|                                             | Hospital-based                | 6              | 4568        | 6146    | 0.957               | 0.824-1.110 | 0.561   | R     | 11.44                 | 0.043   | 56.28              | 0.875             |
|                                             | HWE in controls               |                |             |         |                     |             |         |       |                       |         |                    |                   |
|                                             | Equilibrium                   | 10             | 5796        | 7996    | 0.974               | 0.862-1.100 | 0.672   | R     | 17.42                 | 0.043   | 48.33              | 0.264             |
|                                             | Disequilibrium                | 2              | 1690        | 1804    | 0.671               | 0.360-1.253 | 0.211   | R     | 8.339                 | 0.004   | 88.01              | NA                |
|                                             | Quality score                 |                |             |         |                     |             |         |       |                       |         |                    |                   |
|                                             | High quality                  | 10             | 7080        | 9280    | 0.977               | 0.878-1.086 | 0.663   | R     | 16.73                 | 0.053   | 46.21              | 0.865             |
|                                             | Low quality                   | 2              | 406         | 520     | 0.547               | 0.399-0.751 | < 0.001 | F     | 1.253                 | 0.263   | 20.20              | NA                |
| Recessive model<br>(TT versus CC+CT)        | Overall                       | 12             | 3743        | 4900    | 1.018               | 0.813-1.276 | 0.874   | R     | 19.01                 | 0.061   | 42.14              | 0.552             |
|                                             | Geographical region           |                |             |         |                     |             |         |       |                       |         |                    |                   |
|                                             | Asian                         | 7              | 2343        | 2849    | 1.217               | 0.706-2.098 | 0.479   | R     | 16.46                 | 0.011   | 63.55              | 0.633             |
|                                             | European                      | 2              | 209         | 512     | 0.821               | 0.446-1.510 | 0.526   | F     | 0.025                 | 0.874   | 0.0                | NA                |
|                                             | American                      | 3              | 1191        | 1539    | 1.017               | 0.775-1.334 | 0.905   | F     | 1.373                 | 0.503   | 0.0                | 0.625             |
|                                             | Cancer type                   |                |             |         |                     |             |         |       |                       |         |                    |                   |
|                                             | Bladder cancer                | 1              | 735         | 732     | 0.910               | 0.627-1.320 | 0.619   | F     | 0.0                   | 1.0     | 0.0                | NA                |
|                                             | Cervical precancerous lesions | 1              | 295         | 296     | 0.657               | 0.290-1.488 | 0.314   | F     | 0.0                   | 1.0     | 0.0                | NA                |
|                                             | CLL                           | 1              | 99          | 342     | 0.848               | 0.408-1.764 | 0.660   | F     | 0.0                   | 1.0     | 0.0                | NA                |
|                                             | Colorectal cancer             | 1              | 408         | 400     | 0.741               | 0.355-1.547 | 0.426   | F     | 0.0                   | 1.0     | 0.0                | NA                |
|                                             | HCC                           | 1              | 147         | 209     | 3.433               | 0.873-13.50 | 0.077   | F     | 0.0                   | 1.0     | 0.0                | NA                |
|                                             | Larynx cancer                 | 1              | 110         | 170     | 0.762               | 0.253-2.292 | 0.628   | F     | 0.0                   | 1.0     | 0.0                | NA                |
|                                             | Lung cancer                   | 1              | 93          | 90      | 0.966               | 0.270-3.456 | 0.957   | F     | 0.0                   | 1.0     | 0.0                | NA                |
|                                             | Neuroblastoma                 | 1              | 429         | 884     | 0.590               | 0.278-1.250 | 0.168   | F     | 0.0                   | 1.0     | 0.0                | NA                |
|                                             | NHL                           | 1              | 180         | 529     | 1.334               | 0.783-2.272 | 0.289   | F     | 0.0                   | 1.0     | 0.0                | NA                |
|                                             | Oral cancer                   | 1              | 439         | 438     | 1.891               | 0.950-3.763 | 0.070   | F     | 0.0                   | 1.0     | 0.0                | NA                |
|                                             | Primary liver cancer          | 1              | 532         | 532     | 3.094               | 1.377-6.952 | 0.006   | F     | 0.0                   | 1.0     | 0.0                | NA                |
|                                             | Renal cell carcinoma          | 1              | 276         | 278     | 0.962               | 0.529-1.749 | 0.899   | F     | 0.0                   | 1.0     | 0.0                | NA                |
|                                             | Genotyping method             |                |             |         |                     |             |         |       |                       |         |                    |                   |
|                                             | TaqMan PCR                    | 4              | 1077        | 1834    | 0.981               | 0.664-1.450 | 0.925   | F     | 5.607                 | 0.132   | 46.50              | 0.610             |
|                                             | RFLP-PCR                      | 3              | 1087        | 1141    | 1.858               | 0.636-5.427 | 0.257   | R     | 7.944                 | 0.019   | 74.82              | 0.621             |
|                                             | SNPlex technology             | 2              | 1011        | 1010    | 0.924               | 0.674-1.268 | 0.624   | F     | 0.024                 | 0.876   | 0.0                | NA                |
|                                             | Other methods                 | 3              | 568         | 915     | 1.067               | 0.700-1.626 | 0.763   | F     | 2.049                 | 0.359   | 2.397              | 0.584             |
|                                             | Source of controls            |                |             |         |                     |             |         |       |                       |         |                    |                   |
|                                             | Population-based              | 6              | 1459        | 1827    | 1.191               | 0.702-2.019 | 0.517   | R     | 11.53                 | 0.042   | 56.63              | 0.498             |
|                                             | Hospital-based                | 6              | 2284        | 3073    | 1.010               | 0.793-1.286 | 0.937   | F     | 7.191                 | 0.207   | 30.47              | 0.977             |
|                                             | HWE in controls               |                |             |         |                     |             |         |       |                       |         |                    |                   |
|                                             | Equilibrium                   | 10             | 2898        | 3998    | 1.139               | 0.809-1.604 | 0.456   | R     | 17.76                 | 0.038   | 49.31              | 0.686             |
|                                             | Disequilibrium                | 2              | 845         | 902     | 0.893               | 0.628-1.271 | 0.531   | F     | 0.089                 | 0.765   | 0.0                | NA                |
|                                             | Quality score                 |                |             |         |                     |             |         |       |                       |         |                    |                   |
|                                             | High quality                  | 10             | 3540        | 4640    | 1.106               | 0.812-1.505 | 0.524   | R     | 18.65                 | 0.028   | 54.75              | 0.383             |
|                                             | Low quality                   | 2              | 203         | 260     | 0.843               | 0.366-1.940 | 0.688   | F     | 0.076                 | 0.783   | 0.0                | NA                |
| Dominant model                              | Overall                       | 12             | 3743        | 4900    | 0.908               | 0.812-1.015 | 0.089   | R     | 30.97                 | 0.001   | 64.48              | 0.085             |

|                                   |                               |    |      |      |              |                    |                   |   |       |         |       |       |
|-----------------------------------|-------------------------------|----|------|------|--------------|--------------------|-------------------|---|-------|---------|-------|-------|
| (CT+TT versus CC)                 | Geographical region           |    |      |      |              |                    |                   |   |       |         |       |       |
|                                   | Asian                         | 7  | 2343 | 2849 | 0.964        | 0.818-1.136        | 0.660             | R | 10.90 | 0.091   | 44.96 | 0.225 |
|                                   | European                      | 2  | 209  | 512  | 0.491        | 0.229-1.053        | 0.068             | R | 5.149 | 0.023   | 80.58 | NA    |
|                                   | American                      | 3  | 1191 | 1539 | 0.882        | 0.755-1.030        | 0.113             | F | 1.465 | 0.481   | 0.0   | 0.733 |
|                                   | Cancer type                   |    |      |      |              |                    |                   |   |       |         |       |       |
|                                   | Bladder cancer                | 1  | 735  | 732  | 0.854        | 0.695-1.049        | 0.133             | F | 0.0   | 1.0     | 0.0   | NA    |
|                                   | Cervical precancerous lesions | 1  | 295  | 296  | 0.907        | 0.648-1.269        | 0.570             | F | 0.0   | 1.0     | 0.0   | NA    |
|                                   | CLL                           | 1  | 99   | 342  | 0.719        | 0.459-1.127        | 0.150             | F | 0.0   | 1.0     | 0.0   | NA    |
|                                   | Colorectal cancer             | 1  | 408  | 400  | <b>0.737</b> | <b>0.554-0.980</b> | <b>0.036</b>      | F | 0.0   | 1.0     | 0.0   | NA    |
|                                   | HCC                           | 1  | 147  | 209  | 0.951        | 0.609-1.486        | 0.827             | F | 0.0   | 1.0     | 0.0   | NA    |
|                                   | Larynx cancer                 | 1  | 110  | 170  | <b>0.330</b> | <b>0.200-0.544</b> | <b>&lt; 0.001</b> | F | 0.0   | 1.0     | 0.0   | NA    |
|                                   | Lung cancer                   | 1  | 93   | 90   | 0.589        | 0.321-1.084        | 0.089             | F | 0.0   | 1.0     | 0.0   | NA    |
|                                   | Neuroblastoma                 | 1  | 429  | 884  | 1.014        | 0.794-1.295        | 0.911             | F | 0.0   | 1.0     | 0.0   | NA    |
|                                   | NHL                           | 1  | 180  | 529  | 1.056        | 0.753-1.482        | 0.752             | F | 0.0   | 1.0     | 0.0   | NA    |
|                                   | Oral cancer                   | 1  | 439  | 438  | 1.235        | 0.933-1.636        | 0.140             | F | 0.0   | 1.0     | 0.0   | NA    |
|                                   | Primary liver cancer          | 1  | 532  | 532  | 1.150        | 0.887-1.492        | 0.290             | F | 0.0   | 1.0     | 0.0   | NA    |
|                                   | Renal cell carcinoma          | 1  | 276  | 278  | 0.805        | 0.577-1.124        | 0.203             | F | 0.0   | 1.0     | 0.0   | NA    |
|                                   | Genotyping method             |    |      |      |              |                    |                   |   |       |         |       |       |
|                                   | TaqMan PCR                    | 4  | 1077 | 1834 | 0.769        | 0.481-1.229        | 0.272             | R | 22.11 | < 0.001 | 86.43 | 0.146 |
|                                   | RFLP-PCR                      | 3  | 1087 | 1141 | 0.933        | 0.694-1.254        | 0.645             | R | 5.139 | 0.077   | 61.08 | 0.899 |
|                                   | SNPlex technology             | 2  | 1011 | 1010 | 0.840        | 0.705-1.001        | 0.052             | F | 0.087 | 0.768   | 0.0   | NA    |
|                                   | Other methods                 | 3  | 568  | 915  | 0.914        | 0.732-1.142        | 0.430             | F | 2.691 | 0.260   | 25.68 | 0.257 |
|                                   | Source of controls            |    |      |      |              |                    |                   |   |       |         |       |       |
|                                   | Population-based              | 6  | 1459 | 1827 | 0.784        | 0.579-1.062        | 0.117             | R | 19.95 | 0.001   | 74.93 | 0.062 |
|                                   | Hospital-based                | 6  | 2284 | 3073 | 0.927        | 0.780-1.102        | 0.390             | R | 10.33 | 0.066   | 51.58 | 0.666 |
|                                   | HWE in controls               |    |      |      |              |                    |                   |   |       |         |       |       |
|                                   | Equilibrium                   | 10 | 2898 | 3998 | 0.955        | 0.862-1.058        | 0.377             | F | 14.01 | 0.122   | 35.73 | 0.083 |
|                                   | Disequilibrium                | 2  | 845  | 902  | 0.546        | 0.215-1.386        | 0.203             | R | 11.87 | 0.001   | 91.57 | NA    |
|                                   | Quality score                 |    |      |      |              |                    |                   |   |       |         |       |       |
|                                   | High quality                  | 10 | 3540 | 4640 | 0.944        | 0.861-1.036        | 0.223             | F | 12.66 | 0.178   | 28.93 | 0.672 |
|                                   | Low quality                   | 2  | 203  | 260  | <b>0.417</b> | <b>0.283-0.614</b> | <b>&lt; 0.001</b> | F | 2.084 | 0.149   | 52.02 | NA    |
| Homozygote model (TT versus CC)   | Overall                       | 12 | 2453 | 3061 | 0.932        | 0.737-1.179        | 0.559             | R | 22.70 | 0.019   | 51.55 | 0.732 |
|                                   | Geographical region           |    |      |      |              |                    |                   |   |       |         |       |       |
|                                   | Asian                         | 7  | 1638 | 1965 | 1.182        | 0.672-2.081        | 0.561             | R | 17.46 | 0.008   | 65.63 | 0.738 |
|                                   | European                      | 2  | 136  | 255  | 0.623        | 0.331-1.174        | 0.143             | F | 0.418 | 0.518   | 0.0   | NA    |
|                                   | American                      | 3  | 679  | 841  | 0.952        | 0.717-1.264        | 0.734             | F | 1.864 | 0.394   | 0.0   | 0.664 |
|                                   | Cancer type                   |    |      |      |              |                    |                   |   |       |         |       |       |
|                                   | Bladder cancer                | 1  | 406  | 381  | 0.841        | 0.571-1.240        | 0.382             | F | 0.0   | 1.0     | 0.0   | NA    |
|                                   | Cervical precancerous lesions | 1  | 202  | 201  | 0.646        | 0.283-1.474        | 0.299             | F | 0.0   | 1.0     | 0.0   | NA    |
|                                   | CLL                           | 1  | 58   | 178  | 0.719        | 0.334-1.547        | 0.399             | F | 0.0   | 1.0     | 0.0   | NA    |
|                                   | Colorectal cancer             | 1  | 280  | 250  | 0.667        | 0.317-1.403        | 0.286             | F | 0.0   | 1.0     | 0.0   | NA    |
|                                   | HCC                           | 1  | 105  | 140  | 3.262        | 0.823-12.93        | 0.092             | F | 0.0   | 1.0     | 0.0   | NA    |
|                                   | Larynx cancer                 | 1  | 78   | 77   | 0.459        | 0.149-1.411        | 0.174             | F | 0.0   | 1.0     | 0.0   | NA    |
|                                   | Lung cancer                   | 1  | 70   | 57   | 0.800        | 0.220-2.912        | 0.735             | F | 0.0   | 1.0     | 0.0   | NA    |
|                                   | Neuroblastoma                 | 1  | 294  | 621  | 0.601        | 0.282-1.279        | 0.187             | F | 0.0   | 1.0     | 0.0   | NA    |
|                                   | NHL                           | 1  | 107  | 307  | 1.330        | 0.761-2.325        | 0.316             | F | 0.0   | 1.0     | 0.0   | NA    |
|                                   | Oral cancer                   | 1  | 305  | 314  | 1.978        | 0.988-3.959        | 0.054             | F | 0.0   | 1.0     | 0.0   | NA    |
|                                   | Primary liver cancer          | 1  | 382  | 382  | <b>3.134</b> | <b>1.390-7.067</b> | <b>0.006</b>      | F | 0.0   | 1.0     | 0.0   | NA    |
|                                   | Renal cell carcinoma          | 1  | 166  | 153  | 0.865        | 0.465-1.606        | 0.645             | F | 0.0   | 1.0     | 0.0   | NA    |
|                                   | Genotyping method             |    |      |      |              |                    |                   |   |       |         |       |       |
|                                   | TaqMan PCR                    | 4  | 735  | 1190 | 0.839        | 0.436-1.614        | 0.599             | R | 7.747 | 0.052   | 61.28 | 0.361 |
|                                   | RFLP-PCR                      | 3  | 767  | 772  | 1.784        | 0.568-5.601        | 0.321             | R | 8.936 | 0.011   | 77.62 | 0.646 |
|                                   | SNPlex technology             | 2  | 572  | 534  | 0.848        | 0.610-1.178        | 0.325             | F | 0.005 | 0.942   | 0.0   | NA    |
|                                   | Other methods                 | 3  | 379  | 565  | 1.027        | 0.665-1.587        | 0.905             | F | 2.183 | 0.336   | 8.392 | 0.497 |
|                                   | Source of controls            |    |      |      |              |                    |                   |   |       |         |       |       |
|                                   | Population-based              | 6  | 991  | 1131 | 1.061        | 0.582-1.934        | 0.847             | R | 14.25 | 0.014   | 64.92 | 0.671 |
|                                   | Hospital-based                | 6  | 1462 | 1930 | 0.965        | 0.752-1.238        | 0.778             | F | 8.391 | 0.136   | 40.41 | 0.986 |
|                                   | HWE in controls               |    |      |      |              |                    |                   |   |       |         |       |       |
|                                   | Equilibrium                   | 10 | 1969 | 2603 | 1.089        | 0.753-1.575        | 0.651             | R | 19.72 | 0.020   | 54.37 | 0.772 |
|                                   | Disequilibrium                | 2  | 484  | 458  | 0.789        | 0.547-1.138        | 0.204             | F | 0.999 | 0.318   | 0.0   | NA    |
|                                   | Quality score                 |    |      |      |              |                    |                   |   |       |         |       |       |
|                                   | High quality                  | 10 | 2305 | 2927 | 1.062        | 0.761-1.483        | 0.724             | R | 20.75 | 0.014   | 56.63 | 0.375 |
|                                   | Low quality                   | 2  | 148  | 134  | 0.583        | 0.250-1.361        | 0.212             | F | 0.405 | 0.525   | 0.0   | NA    |
| Heterozygote model (CT versus CC) | Overall                       | 12 | 3533 | 4621 | <b>0.848</b> | <b>0.727-0.989</b> | <b>0.036</b>      | R | 26.82 | 0.005   | 58.99 | 0.046 |
|                                   | Geographical region           |    |      |      |              |                    |                   |   |       |         |       |       |
|                                   | Asian                         | 7  | 2251 | 2757 | 0.961        | 0.851-1.084        | 0.517             | F | 8.425 | 0.209   | 28.79 | 0.117 |
|                                   | European                      | 2  | 194  | 462  | 0.480        | 0.214-1.074        | 0.074             | R | 5.235 | 0.022   | 80.90 | NA    |
|                                   | American                      | 3  | 1088 | 1402 | 0.869        | 0.738-1.022        | 0.090             | F | 0.810 | 0.667   | 0.0   | 0.827 |
|                                   | Cancer type                   |    |      |      |              |                    |                   |   |       |         |       |       |
|                                   | Bladder cancer                | 1  | 677  | 669  | 0.857        | 0.692-1.061        | 0.156             | F | 0.0   | 1.0     | 0.0   | NA    |

|                                      |    |      |      |              |                    |                   |   |       |         |       |       |
|--------------------------------------|----|------|------|--------------|--------------------|-------------------|---|-------|---------|-------|-------|
| <i>Cervical precancerous lesions</i> | 1  | 285  | 281  | 0.948        | 0.668-1.346        | 0.766             | F | 0.0   | 1.0     | 0.0   | NA    |
| <i>CLL</i>                           | 1  | 89   | 302  | 0.719        | 0.447-1.155        | 0.172             | F | 0.0   | 1.0     | 0.0   | NA    |
| <i>Colorectal cancer</i>             | 1  | 395  | 383  | <b>0.745</b> | <b>0.555-0.999</b> | <b>0.049</b>      | F | 0.0   | 1.0     | 0.0   | NA    |
| <i>HCC</i>                           | 1  | 140  | 206  | 0.851        | 0.536-1.352        | 0.494             | F | 0.0   | 1.0     | 0.0   | NA    |
| <i>Larynx cancer</i>                 | 1  | 105  | 160  | <b>0.316</b> | <b>0.188-0.532</b> | <b>&lt; 0.001</b> | F | 0.0   | 1.0     | 0.0   | NA    |
| <i>Lung cancer</i>                   | 1  | 88   | 85   | 0.558        | 0.292-1.063        | 0.076             | F | 0.0   | 1.0     | 0.0   | NA    |
| <i>Neuroblastoma</i>                 | 1  | 420  | 853  | 1.063        | 0.827-1.366        | 0.635             | F | 0.0   | 1.0     | 0.0   | NA    |
| <i>NHL</i>                           | 1  | 158  | 479  | 0.994        | 0.693-1.426        | 0.975             | F | 0.0   | 1.0     | 0.0   | NA    |
| <i>Oral cancer</i>                   | 1  | 415  | 425  | 1.158        | 0.863-1.552        | 0.328             | F | 0.0   | 1.0     | 0.0   | NA    |
| <i>Primary liver cancer</i>          | 1  | 508  | 524  | 1.045        | 0.799-1.367        | 0.750             | F | 0.0   | 1.0     | 0.0   | NA    |
| <i>Renal cell carcinoma</i>          | 1  | 253  | 254  | 0.794        | 0.560-1.126        | 0.196             | F | 0.0   | 1.0     | 0.0   | NA    |
| <i>Genotyping method</i>             |    |      |      |              |                    |                   |   |       |         |       |       |
| <i>TaqMan PCR</i>                    | 4  | 1029 | 1740 | 0.760        | 0.473-1.222        | 0.257             | R | 20.85 | < 0.001 | 85.61 | 0.122 |
| <i>RFLP-PCR</i>                      | 3  | 1043 | 1113 | 0.888        | 0.740-1.066        | 0.204             | F | 2.813 | 0.245   | 28.91 | 0.814 |
| <i>SNPlex technology</i>             | 2  | 930  | 923  | 0.839        | 0.699-1.007        | 0.059             | F | 0.132 | 0.716   | 0.0   | NA    |
| <i>Other methods</i>                 | 3  | 531  | 845  | 0.902        | 0.714-1.140        | 0.388             | F | 2.493 | 0.287   | 19.78 | 0.107 |
| <i>Source of controls</i>            |    |      |      |              |                    |                   |   |       |         |       |       |
| <i>Population-based</i>              | 6  | 1380 | 1727 | 0.760        | 0.567-1.019        | 0.066             | R | 17.02 | 0.004   | 70.62 | 0.065 |
| <i>Hospital-based</i>                | 6  | 2153 | 2894 | 0.924        | 0.821-1.041        | 0.194             | F | 8.520 | 0.130   | 41.31 | 0.509 |
| <i>HWE in controls</i>               |    |      |      |              |                    |                   |   |       |         |       |       |
| <i>Equilibrium</i>                   | 10 | 2751 | 3792 | 0.933        | 0.839-1.038        | 0.201             | F | 10.75 | 0.293   | 16.28 | 0.032 |
| <i>Disequilibrium</i>                | 2  | 782  | 829  | 0.536        | 0.202-1.422        | 0.210             | R | 12.06 | 0.001   | 91.71 | NA    |
| <i>Quality score</i>                 |    |      |      |              |                    |                   |   |       |         |       |       |
| <i>High quality</i>                  | 10 | 3340 | 4376 | 0.928        | 0.842-1.021        | 0.126             | F | 8.906 | 0.446   | 0.0   | 0.464 |
| <i>Low quality</i>                   | 2  | 193  | 245  | <b>0.395</b> | <b>0.264-0.593</b> | <b>&lt; 0.001</b> | F | 1.805 | 0.179   | 44.60 | NA    |

OR: odds ratio, CI: confidence interval, F: fixed model, R: random model, NA: not appreciable

Supplementary Table S13. Meta-analysis of the association between **RAN (A > G; rs3803012)** variant and cancer risk.

| Comparison                                  | Subgroups           | No. of studies | Sample size |         | Test of association |             |         |       | Test of heterogeneity |         |                    | Publication bias  |
|---------------------------------------------|---------------------|----------------|-------------|---------|---------------------|-------------|---------|-------|-----------------------|---------|--------------------|-------------------|
|                                             |                     |                | Cancer      | Control | OR                  | 95% CI      | P-value | Model | Q test                | P-value | I <sup>2</sup> (%) | P-value (Egger's) |
| Allelic model<br>(G allele versus A allele) | Overall             | 5              | 8600        | 9930    | 1.103               | 0.969-1.254 | 0.138   | F     | 0.888                 | 0.926   | 0.0                | 0.958             |
|                                             | Geographical region |                |             |         |                     |             |         |       |                       |         |                    |                   |
|                                             | Asian               | 5              | 8600        | 9930    | 1.103               | 0.969-1.254 | 0.138   | F     | 0.888                 | 0.926   | 0.0                | 0.958             |
|                                             | Cancer type         |                |             |         |                     |             |         |       |                       |         |                    |                   |
|                                             | HCC                 | 2              | 3136        | 3320    | 1.081               | 0.866-1.350 | 0.490   | F     | 0.0                   | 0.996   | 0.0                | NA                |
|                                             | Breast cancer       | 1              | 1740        | 1768    | 1.008               | 0.773-1.315 | 0.954   | F     | 0.0                   | 1.0     | 0.0                | NA                |
|                                             | Cervical cancer     | 1              | 2942        | 3058    | 1.171               | 0.923-1.486 | 0.192   | F     | 0.0                   | 1.0     | 0.0                | NA                |
|                                             | Head/Neck cancer    | 1              | 782         | 1784    | 1.188               | 0.833-1.696 | 0.341   | F     | 0.0                   | 1.0     | 0.0                | NA                |
|                                             | Genotyping method   |                |             |         |                     |             |         |       |                       |         |                    |                   |
|                                             | TaqMan PCR          | 5              | 8600        | 9930    | 1.103               | 0.969-1.254 | 0.138   | F     | 0.888                 | 0.926   | 0.0                | 0.958             |
|                                             | Source of controls  |                |             |         |                     |             |         |       |                       |         |                    |                   |
|                                             | Population-based    | 4              | 7976        | 9290    | 1.106               | 0.963-1.270 | 0.155   | F     | 0.876                 | 0.831   | 0.0                | 0.863             |
|                                             | Hospital-based      | 1              | 624         | 640     | 1.082               | 0.755-1.550 | 0.668   | F     | 0.0                   | 1.0     | 0.0                | NA                |
|                                             | HWE in controls     |                |             |         |                     |             |         |       |                       |         |                    |                   |
|                                             | Equilibrium         | 5              | 8600        | 9930    | 1.103               | 0.969-1.254 | 0.138   | F     | 0.888                 | 0.926   | 0.0                | 0.958             |
|                                             | Quality score       |                |             |         |                     |             |         |       |                       |         |                    |                   |
|                                             | High quality        | 5              | 8600        | 9930    | 1.103               | 0.969-1.254 | 0.138   | F     | 0.888                 | 0.926   | 0.0                | 0.958             |
| Recessive model<br>(GG versus AA+AG)        | Overall             | 5              | 4300        | 4965    | 1.930               | 1.032-3.611 | 0.040   | F     | 0.982                 | 0.913   | 0.0                | 0.613             |
|                                             | Geographical region |                |             |         |                     |             |         |       |                       |         |                    |                   |
|                                             | Asian               | 5              | 4300        | 4965    | 1.930               | 1.032-3.611 | 0.040   | F     | 0.982                 | 0.913   | 0.0                | 0.613             |
|                                             | Cancer type         |                |             |         |                     |             |         |       |                       |         |                    |                   |
|                                             | HCC                 | 2              | 1568        | 1660    | 1.521               | 0.528-4.384 | 0.437   | F     | 0.533                 | 0.466   | 0.0                | NA                |
|                                             | Breast cancer       | 1              | 870         | 884     | 2.459               | 0.863-7.009 | 0.092   | F     | 0.0                   | 1.0     | 0.0                | NA                |
|                                             | Cervical cancer     | 1              | 1471        | 1529    | 1.735               | 0.414-7.272 | 0.451   | F     | 0.0                   | 1.0     | 0.0                | NA                |
|                                             | Head/Neck cancer    | 1              | 391         | 892     | 2.288               | 0.321-16.30 | 0.409   | F     | 0.0                   | 1.0     | 0.0                | NA                |
|                                             | Genotyping method   |                |             |         |                     |             |         |       |                       |         |                    |                   |
|                                             | TaqMan PCR          | 5              | 4300        | 4965    | 1.930               | 1.032-3.611 | 0.040   | F     | 0.982                 | 0.913   | 0.0                | 0.613             |
|                                             | Source of controls  |                |             |         |                     |             |         |       |                       |         |                    |                   |
|                                             | Population-based    | 4              | 3988        | 4645    | 2.284               | 1.095-4.761 | 0.028   | F     | 0.247                 | 0.970   | 0.0                | 0.802             |
|                                             | Hospital-based      | 1              | 312         | 320     | 1.235               | 0.373-4.090 | 0.729   | F     | 0.0                   | 1.0     | 0.0                | NA                |
|                                             | HWE in controls     |                |             |         |                     |             |         |       |                       |         |                    |                   |
|                                             | Equilibrium         | 5              | 4300        | 4965    | 1.930               | 1.032-3.611 | 0.040   | F     | 0.982                 | 0.913   | 0.0                | 0.613             |
|                                             | Quality score       |                |             |         |                     |             |         |       |                       |         |                    |                   |
|                                             | High quality        | 5              | 4300        | 4965    | 1.930               | 1.032-3.611 | 0.040   | F     | 0.982                 | 0.913   | 0.0                | 0.613             |
| Dominant model<br>(AG+GG versus AA)         | Overall             | 5              | 4300        | 4965    | 1.077               | 0.940-1.234 | 0.285   | F     | 1.547                 | 0.818   | 0.0                | 0.987             |
|                                             | Geographical region |                |             |         |                     |             |         |       |                       |         |                    |                   |
|                                             | Asian               | 5              | 4300        | 4965    | 1.077               | 0.940-1.234 | 0.285   | F     | 1.547                 | 0.818   | 0.0                | 0.987             |
|                                             | Cancer type         |                |             |         |                     |             |         |       |                       |         |                    |                   |
|                                             | HCC                 | 2              | 1568        | 1660    | 1.066               | 0.843-1.347 | 0.594   | F     | 0.003                 | 0.959   | 0.0                | NA                |
|                                             | Breast cancer       | 1              | 870         | 884     | 0.936               | 0.704-1.244 | 0.648   | F     | 0.0                   | 1.0     | 0.0                | NA                |
|                                             | Cervical cancer     | 1              | 1471        | 1529    | 1.166               | 0.911-1.493 | 0.223   | F     | 0.0                   | 1.0     | 0.0                | NA                |
|                                             | Head/Neck cancer    | 1              | 391         | 892     | 1.174               | 0.808-1.704 | 0.400   | F     | 0.0                   | 1.0     | 0.0                | NA                |
|                                             | Genotyping method   |                |             |         |                     |             |         |       |                       |         |                    |                   |
|                                             | TaqMan PCR          | 5              | 4300        | 4965    | 1.077               | 0.940-1.234 | 0.285   | F     | 1.547                 | 0.818   | 0.0                | 0.987             |
|                                             | Source of controls  |                |             |         |                     |             |         |       |                       |         |                    |                   |
|                                             | Population-based    | 4              | 3988        | 4645    | 1.077               | 0.932-1.245 | 0.313   | F     | 1.547                 | 0.672   | 0.0                | 0.977             |
|                                             | Hospital-based      | 1              | 312         | 320     | 1.075               | 0.724-1.595 | 0.721   | F     | 0.0                   | 1.0     | 0.0                | NA                |
|                                             | HWE in controls     |                |             |         |                     |             |         |       |                       |         |                    |                   |
|                                             | Equilibrium         | 5              | 4300        | 4965    | 1.077               | 0.940-1.234 | 0.285   | F     | 1.547                 | 0.818   | 0.0                | 0.987             |
|                                             | Quality score       |                |             |         |                     |             |         |       |                       |         |                    |                   |
|                                             | High quality        | 5              | 4300        | 4965    | 1.077               | 0.940-1.234 | 0.285   | F     | 1.547                 | 0.818   | 0.0                | 0.987             |
| Homozygote model<br>(GG versus AA)          | Overall             | 5              | 3871        | 4485    | 1.933               | 1.033-3.618 | 0.039   | F     | 0.931                 | 0.920   | 0.0                | 0.578             |
|                                             | Geographical region |                |             |         |                     |             |         |       |                       |         |                    |                   |
|                                             | Asian               | 5              | 3871        | 4485    | 1.933               | 1.033-3.618 | 0.039   | F     | 0.931                 | 0.920   | 0.0                | 0.578             |
|                                             | Cancer type         |                |             |         |                     |             |         |       |                       |         |                    |                   |
|                                             | HCC                 | 2              | 1417        | 1507    | 1.535               | 0.532-4.432 | 0.428   | F     | 0.524                 | 0.469   | 0.0                | NA                |
|                                             | Breast cancer       | 1              | 778         | 777     | 2.419               | 0.848-6.899 | 0.099   | F     | 0.0                   | 1.0     | 0.0                | NA                |
|                                             | Cervical cancer     | 1              | 1330        | 1400    | 1.757               | 0.419-7.367 | 0.441   | F     | 0.0                   | 1.0     | 0.0                | NA                |
|                                             | Head/Neck cancer    | 1              | 346         | 801     | 2.323               | 0.326-16.56 | 0.400   | F     | 0.0                   | 1.0     | 0.0                | NA                |
|                                             | Genotyping method   |                |             |         |                     |             |         |       |                       |         |                    |                   |
|                                             | TaqMan PCR          | 5              | 3871        | 4485    | 1.933               | 1.033-3.618 | 0.039   | F     | 0.931                 | 0.920   | 0.0                | 0.578             |
|                                             | Source of controls  |                |             |         |                     |             |         |       |                       |         |                    |                   |
|                                             | Population-based    | 4              | 3615        | 4220    | 2.279               | 1.093-4.752 | 0.028   | F     | 0.228                 | 0.973   | 0.0                | 0.736             |
|                                             | Hospital-based      | 1              | 256         | 265     | 1.248               | 0.376-4.141 | 0.717   | F     | 0.0                   | 1.0     | 0.0                | NA                |
|                                             | HWE in controls     |                |             |         |                     |             |         |       |                       |         |                    |                   |

|                                              |                            |   |      |      |              |                    |              |   |       |       |     |       |
|----------------------------------------------|----------------------------|---|------|------|--------------|--------------------|--------------|---|-------|-------|-----|-------|
| <b>Heterozygote model<br/>(AG versus AA)</b> | <i>Equilibrium</i>         | 5 | 3871 | 4485 | <b>1.933</b> | <b>1.033-3.618</b> | <b>0.039</b> | F | 0.931 | 0.920 | 0.0 | 0.578 |
|                                              | <i>Quality score</i>       |   |      |      |              |                    |              |   |       |       |     |       |
|                                              | <i>High quality</i>        | 5 | 3871 | 4485 | <b>1.933</b> | <b>1.033-3.618</b> | <b>0.039</b> | F | 0.931 | 0.920 | 0.0 | 0.578 |
|                                              | <b>Overall</b>             | 5 | 4272 | 4949 | 1.047        | 0.911-1.203        | 0.518        | F | 2.368 | 0.669 | 0.0 | 0.965 |
|                                              | <i>Geographical region</i> |   |      |      |              |                    |              |   |       |       |     |       |
|                                              | <i>Asian</i>               | 5 | 4272 | 4949 | 1.047        | 0.911-1.203        | 0.518        | F | 2.368 | 0.669 | 0.0 | 0.965 |
|                                              | <i>Cancer type</i>         |   |      |      |              |                    |              |   |       |       |     |       |
|                                              | <i>HCC</i>                 | 2 | 1559 | 1654 | 1.046        | 0.824-1.327        | 0.714        | F | 0.006 | 0.941 | 0.0 | NA    |
|                                              | <i>Breast cancer</i>       | 1 | 858  | 879  | 0.867        | 0.644-1.165        | 0.343        | F | 0.0   | 1.0   | 0.0 | NA    |
|                                              | <i>Cervical cancer</i>     | 1 | 1466 | 1526 | 1.152        | 0.897-1.480        | 0.267        | F | 0.0   | 1.0   | 0.0 | NA    |
|                                              | <i>Head/Neck cancer</i>    | 1 | 389  | 890  | 1.149        | 0.786-1.678        | 0.474        | F | 0.0   | 1.0   | 0.0 | NA    |
|                                              | <i>Genotyping method</i>   |   |      |      |              |                    |              |   |       |       |     |       |
|                                              | <i>TaqMan PCR</i>          | 5 | 4272 | 4949 | 1.047        | 0.911-1.203        | 0.518        | F | 2.368 | 0.669 | 0.0 | 0.965 |
|                                              | <i>Source of controls</i>  |   |      |      |              |                    |              |   |       |       |     |       |
|                                              | <i>Population-based</i>    | 4 | 3966 | 4634 | 1.045        | 0.902-1.211        | 0.556        | F | 2.364 | 0.500 | 0.0 | 0.925 |
|                                              | <i>Hospital-based</i>      | 1 | 306  | 315  | 1.059        | 0.702-1.597        | 0.785        | F | 0.0   | 1.0   | 0.0 | NA    |
|                                              | <i>HWE in controls</i>     |   |      |      |              |                    |              |   |       |       |     |       |
|                                              | <i>Equilibrium</i>         | 5 | 4272 | 4949 | 1.047        | 0.911-1.203        | 0.518        | F | 2.368 | 0.669 | 0.0 | 0.965 |
|                                              | <i>Quality score</i>       |   |      |      |              |                    |              |   |       |       |     |       |
|                                              | <i>High quality</i>        | 5 | 4272 | 4949 | 1.047        | 0.911-1.203        | 0.518        | F | 2.368 | 0.669 | 0.0 | 0.965 |

OR: odds ratio, CI: confidence interval, F: fixed model, R: random model, NA: not appreciable

Supplementary Table S14. Meta-analysis of the association between **DICER (A > T; rs13078)** variant and cancer risk.

| Comparison                                         | Subgroups                            | No. of studies | Sample size |         | Test of association |                    |                   |       | Test of heterogeneity |         |                    | Publication bias  |
|----------------------------------------------------|--------------------------------------|----------------|-------------|---------|---------------------|--------------------|-------------------|-------|-----------------------|---------|--------------------|-------------------|
|                                                    |                                      |                | Cancer      | Control | OR                  | 95% CI             | P-value           | Model | Q test                | P-value | I <sup>2</sup> (%) | P-value (Egger's) |
| <b>Allelic model</b><br>(T allele versus A allele) | <b>Overall</b>                       | 9              | 6654        | 7496    | 0.970               | 0.826-1.138        | 0.709             | R     | 23.48                 | 0.003   | 65.93              | 0.795             |
|                                                    | <b>Geographical region</b>           |                |             |         |                     |                    |                   |       |                       |         |                    |                   |
|                                                    | <i>Asian</i>                         | 5              | 4166        | 4434    | 1.007               | 0.826-1.228        | 0.943             | F     | 0.873                 | 0.928   | 0.0                | 0.077             |
|                                                    | <i>European</i>                      | 2              | 466         | 1030    | 0.571               | 0.304-1.071        | 0.081             | R     | 5.367                 | 0.021   | 81.37              | NA                |
|                                                    | <i>American</i>                      | 2              | 2022        | 2032    | 1.003               | 0.742-1.356        | 0.982             | R     | 2.946                 | 0.086   | 66.05              | NA                |
|                                                    | <b>Cancer type</b>                   |                |             |         |                     |                    |                   |       |                       |         |                    |                   |
|                                                    | <i>Bladder cancer</i>                | 2              | 2826        | 2922    | 0.892               | 0.760-1.047        | 0.161             | F     | 0.081                 | 0.776   | 0.0                | NA                |
|                                                    | <i>Breast cancer</i>                 | 1              | 1728        | 1784    | 1.009               | 0.740-1.375        | 0.957             | F     | 0.0                   | 1.0     | 0.0                | NA                |
|                                                    | <i>Cervical precancerous lesions</i> | 1              | 590         | 592     | 1.077               | 0.515-2.252        | 0.844             | F     | 0.0                   | 1.0     | 0.0                | NA                |
|                                                    | <i>CLL</i>                           | 1              | 210         | 690     | 0.793               | 0.527-1.192        | 0.264             | F     | 0.0                   | 1.0     | 0.0                | NA                |
|                                                    | <i>HCC</i>                           | 1              | 294         | 418     | 1.268               | 0.623-2.582        | 0.512             | F     | 0.0                   | 1.0     | 0.0                | NA                |
|                                                    | <i>Larynx cancer</i>                 | 1              | 256         | 340     | <b>0.417</b>        | <b>0.291-0.597</b> | <b>&lt; 0.001</b> | F     | 0.0                   | 1.0     | 0.0                | NA                |
|                                                    | <i>Lung cancer</i>                   | 1              | 196         | 194     | 1.222               | 0.495-3.019        | 0.664             | F     | 0.0                   | 1.0     | 0.0                | NA                |
|                                                    | <i>Renal cell carcinoma</i>          | 1              | 554         | 556     | 1.201               | 0.887-1.625        | 0.237             | F     | 0.0                   | 1.0     | 0.0                | NA                |
|                                                    | <b>Genotyping method</b>             |                |             |         |                     |                    |                   |       |                       |         |                    |                   |
|                                                    | <i>TaqMan PCR</i>                    | 3              | 2194        | 2814    | 0.695               | 0.406-1.192        | 0.186             | R     | 13.60                 | 0.001   | 85.29              | 0.729             |
|                                                    | <i>SNPlex technology</i>             | 2              | 2022        | 2032    | 1.003               | 0.742-1.356        | 0.982             | R     | 2.946                 | 0.086   | 66.05              | NA                |
|                                                    | <i>Other methods</i>                 | 4              | 2438        | 2650    | 1.006               | 0.778-1.302        | 0.962             | F     | 0.873                 | 0.832   | 0.0                | 0.075             |
|                                                    | <b>Source of controls</b>            |                |             |         |                     |                    |                   |       |                       |         |                    |                   |
|                                                    | <i>Population-based</i>              | 7              | 5100        | 5856    | 0.873               | 0.668-1.142        | 0.322             | R     | 22.86                 | 0.001   | 73.75              | 0.957             |
|                                                    | <i>Hospital-based</i>                | 2              | 1554        | 1640    | 0.956               | 0.710-1.287        | 0.766             | F     | 0.319                 | 0.572   | 0.0                | NA                |
|                                                    | <b>HWE in controls</b>               |                |             |         |                     |                    |                   |       |                       |         |                    |                   |
|                                                    | <i>Equilibrium</i>                   | 8              | 6398        | 7156    | 0.960               | 0.853-1.081        | 0.498             | F     | 4.892                 | 0.673   | 0.0                | 0.239             |
|                                                    | <i>Disequilibrium</i>                | 1              | 256         | 340     | <b>0.417</b>        | <b>0.291-0.597</b> | <b>&lt; 0.001</b> | F     | 0.0                   | 1.0     | 0.0                | NA                |
|                                                    | <b>Quality score</b>                 |                |             |         |                     |                    |                   |       |                       |         |                    |                   |
|                                                    | <i>High quality</i>                  | 7              | 6202        | 6962    | 0.956               | 0.848-1.077        | 0.458             | F     | 4.613                 | 0.594   | 0.0                | 0.351             |
|                                                    | <i>Low quality</i>                   | 2              | 452         | 534     | 0.657               | 0.232-1.861        | 0.429             | R     | 4.695                 | 0.030   | 78.70              | NA                |
| <b>Recessive model</b><br>(TT versus AA+AT)        | <b>Overall</b>                       | 6              | 2787        | 3146    | 1.094               | 0.763-1.570        | 0.626             | F     | 4.912                 | 0.427   | 0.0                | 0.925             |
|                                                    | <b>Geographical region</b>           |                |             |         |                     |                    |                   |       |                       |         |                    |                   |
|                                                    | <i>Asian</i>                         | 2              | 1543        | 1615    | 0.861               | 0.227-3.267        | 0.826             | F     | 2.658                 | 0.103   | 62.37              | NA                |
|                                                    | <i>European</i>                      | 2              | 233         | 515     | 1.395               | 0.717-2.717        | 0.327             | F     | 1.188                 | 0.276   | 15.85              | NA                |
|                                                    | <i>American</i>                      | 2              | 1011        | 1016    | 1.005               | 0.638-1.581        | 0.983             | F     | 0.294                 | 0.587   | 0.0                | NA                |
|                                                    | <b>Cancer type</b>                   |                |             |         |                     |                    |                   |       |                       |         |                    |                   |
|                                                    | <i>Bladder cancer</i>                | 2              | 1413        | 1461    | 0.865               | 0.523-1.430        | 0.571             | F     | 1.741                 | 0.187   | 42.55              | NA                |
|                                                    | <i>Breast cancer</i>                 | 1              | 864         | 892     | 2.070               | 0.378-11.33        | 0.402             | F     | 0.0                   | 1.0     | 0.0                | NA                |
|                                                    | <i>CLL</i>                           | 1              | 105         | 345     | 1.950               | 0.795-4.785        | 0.145             | F     | 0.0                   | 1.0     | 0.0                | NA                |
|                                                    | <i>Larynx cancer</i>                 | 1              | 128         | 170     | 0.926               | 0.342-2.502        | 0.879             | F     | 0.0                   | 1.0     | 0.0                | NA                |
|                                                    | <i>Renal cell carcinoma</i>          | 1              | 277         | 278     | 1.264               | 0.491-3.252        | 0.627             | F     | 0.0                   | 1.0     | 0.0                | NA                |
|                                                    | <b>Genotyping method</b>             |                |             |         |                     |                    |                   |       |                       |         |                    |                   |
|                                                    | <i>TaqMan PCR</i>                    | 3              | 1097        | 1407    | 1.471               | 0.791-2.735        | 0.223             | F     | 1.367                 | 0.505   | 0.0                | 0.874             |
|                                                    | <i>SNPlex technology</i>             | 2              | 1011        | 1016    | 1.005               | 0.638-1.581        | 0.983             | F     | 0.294                 | 0.587   | 0.0                | NA                |
|                                                    | <i>Other methods</i>                 | 1              | 679         | 723     | 0.212               | 0.025-1.818        | 0.157             | F     | 0.0                   | 1.0     | 0.0                | NA                |
|                                                    | <b>Source of controls</b>            |                |             |         |                     |                    |                   |       |                       |         |                    |                   |
|                                                    | <i>Population-based</i>              | 5              | 2108        | 2423    | 1.147               | 0.796-1.655        | 0.462             | F     | 2.606                 | 0.626   | 0.0                | 0.227             |
|                                                    | <i>Hospital-based</i>                | 1              | 679         | 723     | 0.212               | 0.025-1.818        | 0.157             | F     | 0.0                   | 1.0     | 0.0                | NA                |
|                                                    | <b>HWE in controls</b>               |                |             |         |                     |                    |                   |       |                       |         |                    |                   |
|                                                    | <i>Equilibrium</i>                   | 5              | 2659        | 2976    | 1.122               | 0.762-1.653        | 0.560             | F     | 4.787                 | 0.310   | 16.44              | 0.977             |
|                                                    | <i>Disequilibrium</i>                | 1              | 128         | 170     | 0.926               | 0.342-2.502        | 0.879             | F     | 0.0                   | 1.0     | 0.0                | NA                |
|                                                    | <b>Quality score</b>                 |                |             |         |                     |                    |                   |       |                       |         |                    |                   |
|                                                    | <i>High quality</i>                  | 5              | 2659        | 2976    | 1.122               | 0.762-1.653        | 0.560             | F     | 4.787                 | 0.310   | 16.44              | 0.977             |
|                                                    | <i>Low quality</i>                   | 1              | 128         | 170     | 0.926               | 0.342-2.502        | 0.879             | F     | 0.0                   | 1.0     | 0.0                | NA                |
| <b>Dominant model</b><br>(AT+TT versus AA)         | <b>Overall</b>                       | 9              | 3327        | 3748    | 0.987               | 0.826-1.178        | 0.882             | R     | 43.13                 | < 0.001 | 81.45              | 0.779             |
|                                                    | <b>Geographical region</b>           |                |             |         |                     |                    |                   |       |                       |         |                    |                   |
|                                                    | <i>Asian</i>                         | 5              | 2083        | 2217    | 1.017               | 0.828-1.250        | 0.870             | F     | 0.706                 | 0.951   | 0.0                | 0.033             |
|                                                    | <i>European</i>                      | 2              | 233         | 515     | 0.341               | 0.109-1.068        | 0.065             | R     | 10.47                 | 0.001   | 90.45              | NA                |
|                                                    | <i>American</i>                      | 2              | 1011        | 1016    | 0.999               | 0.692-1.442        | 0.995             | R     | 3.215                 | 0.073   | 68.90              | NA                |
|                                                    | <b>Cancer type</b>                   |                |             |         |                     |                    |                   |       |                       |         |                    |                   |
|                                                    | <i>Bladder cancer</i>                | 2              | 1413        | 1461    | 0.884               | 0.737-1.060        | 0.184             | F     | 0.451                 | 0.502   | 0.0                | NA                |
|                                                    | <i>Breast cancer</i>                 | 1              | 864         | 892     | 0.981               | 0.710-1.355        | 0.907             | F     | 0.0                   | 1.0     | 0.0                | NA                |
|                                                    | <i>Cervical precancerous lesions</i> | 1              | 295         | 296     | 1.079               | 0.511-2.277        | 0.842             | F     | 0.0                   | 1.0     | 0.0                | NA                |
|                                                    | <i>CLL</i>                           | 1              | 105         | 345     | <b>0.609</b>        | <b>0.373-0.994</b> | <b>0.047</b>      | F     | 0.0                   | 1.0     | 0.0                | NA                |
|                                                    | <i>HCC</i>                           | 1              | 147         | 209     | 1.283               | 0.619-2.660        | 0.502             | F     | 0.0                   | 1.0     | 0.0                | NA                |

|                                      |                                      |   |      |      |              |                    |                   |   |       |         |       |       |
|--------------------------------------|--------------------------------------|---|------|------|--------------|--------------------|-------------------|---|-------|---------|-------|-------|
|                                      | <i>Larynx cancer</i>                 | 1 | 128  | 170  | <b>0.190</b> | <b>0.114-0.316</b> | <b>&lt; 0.001</b> | F | 0.0   | 1.0     | 0.0   | NA    |
|                                      | <i>Lung cancer</i>                   | 1 | 98   | 97   | 1.236        | 0.488-3.132        | 0.655             | F | 0.0   | 1.0     | 0.0   | NA    |
|                                      | <i>Renal cell carcinoma</i>          | 1 | 277  | 278  | 1.239        | 0.872-1.761        | 0.232             | F | 0.0   | 1.0     | 0.0   | NA    |
|                                      | Genotyping method                    |   |      |      |              |                    |                   |   |       |         |       |       |
|                                      | <i>TaqMan PCR</i>                    | 3 | 1097 | 1407 | 0.491        | 0.190-1.270        | 0.142             | R | 28.49 | < 0.001 | 92.98 | 0.367 |
|                                      | <i>SNPlex technology</i>             | 2 | 1011 | 1016 | 0.999        | 0.692-1.442        | 0.995             | R | 3.215 | 0.073   | 68.90 | NA    |
|                                      | <i>Other methods</i>                 | 4 | 1219 | 1325 | 1.043        | 0.798-1.363        | 0.757             | F | 0.623 | 0.891   | 0.0   | 0.102 |
|                                      | Source of controls                   |   |      |      |              |                    |                   |   |       |         |       |       |
|                                      | <i>Population-based</i>              | 7 | 2550 | 2928 | 0.768        | 0.509-1.159        | 0.208             | R | 41.69 | < 0.001 | 85.61 | 0.668 |
|                                      | <i>Hospital-based</i>                | 2 | 777  | 820  | 0.998        | 0.731-1.363        | 0.992             | F | 0.229 | 0.633   | 0.0   | NA    |
|                                      | HWE in controls                      |   |      |      |              |                    |                   |   |       |         |       |       |
|                                      | <i>Equilibrium</i>                   | 8 | 3199 | 3578 | 0.942        | 0.825-1.076        | 0.378             | F | 7.501 | 0.379   | 6.676 | 0.442 |
|                                      | <i>Disequilibrium</i>                | 1 | 128  | 170  | <b>0.190</b> | <b>0.114-0.316</b> | <b>&lt; 0.001</b> | F | 0.0   | 1.0     | 0.0   | NA    |
|                                      | Quality score                        |   |      |      |              |                    |                   |   |       |         |       |       |
|                                      | <i>High quality</i>                  | 7 | 3101 | 3481 | 0.937        | 0.819-1.071        | 0.339             | F | 7.166 | 0.306   | 16.27 | 0.592 |
|                                      | <i>Low quality</i>                   | 2 | 226  | 267  | 0.465        | 0.074-2.908        | 0.413             | R | 12.01 | 0.001   | 91.67 | NA    |
| Homozygote model<br>(TT versus AA)   | Overall                              | 6 | 2281 | 2446 | 0.923        | 0.640-1.331        | 0.669             | F | 8.331 | 0.139   | 39.99 | 0.770 |
|                                      | Geographical region                  |   |      |      |              |                    |                   |   |       |         |       |       |
|                                      | <i>Asian</i>                         | 2 | 1393 | 1456 | 0.860        | 0.227-3.262        | 0.824             | F | 2.642 | 0.104   | 62.15 | NA    |
|                                      | <i>European</i>                      | 2 | 168  | 280  | 0.753        | 0.162-3.496        | 0.717             | R | 4.939 | 0.026   | 79.75 | NA    |
|                                      | <i>American</i>                      | 2 | 720  | 710  | 0.981        | 0.621-1.549        | 0.933             | F | 0.562 | 0.454   | 0.0   | NA    |
|                                      | Cancer type                          |   |      |      |              |                    |                   |   |       |         |       |       |
|                                      | <i>Bladder cancer</i>                | 2 | 1138 | 1157 | 0.823        | 0.496-1.366        | 0.451             | F | 1.615 | 0.204   | 38.09 | NA    |
|                                      | <i>Breast cancer</i>                 | 1 | 789  | 811  | 2.061        | 0.376-11.28        | 0.404             | F | 0.0   | 1.0     | 0.0   | NA    |
|                                      | <i>CLL</i>                           | 1 | 86   | 234  | 1.612        | 0.651-3.989        | 0.302             | F | 0.0   | 1.0     | 0.0   | NA    |
|                                      | <i>Larynx cancer</i>                 | 1 | 82   | 46   | <b>0.336</b> | <b>0.118-0.955</b> | <b>0.041</b>      | F | 0.0   | 1.0     | 0.0   | NA    |
|                                      | <i>Renal cell carcinoma</i>          | 1 | 186  | 198  | 1.349        | 0.521-3.496        | 0.537             | F | 0.0   | 1.0     | 0.0   | NA    |
|                                      | Genotyping method                    |   |      |      |              |                    |                   |   |       |         |       |       |
|                                      | <i>TaqMan PCR</i>                    | 3 | 957  | 1091 | 0.968        | 0.303-3.088        | 0.956             | R | 5.906 | 0.052   | 66.13 | 0.890 |
|                                      | <i>SNPlex technology</i>             | 2 | 720  | 710  | 0.981        | 0.621-1.549        | 0.933             | F | 0.562 | 0.454   | 0.0   | NA    |
|                                      | <i>Other methods</i>                 | 1 | 604  | 645  | 0.212        | 0.025-1.822        | 0.158             | F | 0.0   | 1.0     | 0.0   | NA    |
|                                      | Source of controls                   |   |      |      |              |                    |                   |   |       |         |       |       |
|                                      | <i>Population-based</i>              | 5 | 1677 | 1801 | 0.965        | 0.665-1.398        | 0.849             | F | 6.482 | 0.166   | 38.29 | 0.754 |
|                                      | <i>Hospital-based</i>                | 1 | 604  | 645  | 0.212        | 0.025-1.822        | 0.158             | F | 0.0   | 1.0     | 0.0   | NA    |
|                                      | HWE in controls                      |   |      |      |              |                    |                   |   |       |         |       |       |
|                                      | <i>Equilibrium</i>                   | 5 | 2199 | 2400 | 1.063        | 0.720-1.571        | 0.758             | F | 4.231 | 0.376   | 5.460 | 0.987 |
|                                      | <i>Disequilibrium</i>                | 1 | 82   | 46   | <b>0.336</b> | <b>0.118-0.955</b> | <b>0.041</b>      | F | 0.0   | 1.0     | 0.0   | NA    |
| Heterozygote model<br>(AT versus AA) | Quality score                        |   |      |      |              |                    |                   |   |       |         |       |       |
|                                      | <i>High quality</i>                  | 5 | 2199 | 2400 | 1.063        | 0.720-1.571        | 0.758             | F | 4.231 | 0.376   | 5.460 | 0.987 |
|                                      | <i>Low quality</i>                   | 1 | 82   | 46   | <b>0.336</b> | <b>0.118-0.955</b> | <b>0.041</b>      | F | 0.0   | 1.0     | 0.0   | NA    |
|                                      | Overall                              | 9 | 3268 | 3678 | 0.976        | 0.817-1.166        | 0.788             | R | 46.27 | < 0.001 | 82.71 | 0.703 |
|                                      | Geographical region                  |   |      |      |              |                    |                   |   |       |         |       |       |
|                                      | <i>Asian</i>                         | 5 | 2078 | 2210 | 1.026        | 0.833-1.265        | 0.806             | F | 0.722 | 0.949   | 0.0   | 0.063 |
|                                      | <i>European</i>                      | 2 | 218  | 491  | <b>0.292</b> | <b>0.110-0.776</b> | <b>0.014</b>      | R | 6.636 | 0.010   | 84.93 | NA    |
|                                      | <i>American</i>                      | 2 | 972  | 977  | 0.989        | 0.687-1.425        | 0.955             | R | 2.955 | 0.086   | 66.16 | NA    |
|                                      | Cancer type                          |   |      |      |              |                    |                   |   |       |         |       |       |
|                                      | <i>Bladder cancer</i>                | 2 | 1383 | 1425 | 0.895        | 0.741-1.081        | 0.249             | F | 0.853 | 0.356   | 0.0   | NA    |
|                                      | <i>Breast cancer</i>                 | 1 | 860  | 890  | 0.954        | 0.687-1.326        | 0.780             | F | 0.0   | 1.0     | 0.0   | NA    |
|                                      | <i>Cervical precancerous lesions</i> | 1 | 295  | 296  | 1.079        | 0.511-2.277        | 0.842             | F | 0.0   | 1.0     | 0.0   | NA    |
|                                      | <i>CLL</i>                           | 1 | 97   | 331  | <b>0.483</b> | <b>0.278-0.838</b> | <b>0.010</b>      | F | 0.0   | 1.0     | 0.0   | NA    |
|                                      | <i>HCC</i>                           | 1 | 147  | 209  | 1.283        | 0.619-2.660        | 0.502             | F | 0.0   | 1.0     | 0.0   | NA    |
|                                      | <i>Larynx cancer</i>                 | 1 | 121  | 160  | <b>0.178</b> | <b>0.106-0.300</b> | <b>&lt; 0.001</b> | F | 0.0   | 1.0     | 0.0   | NA    |
|                                      | <i>Lung cancer</i>                   | 1 | 98   | 97   | 1.236        | 0.488-3.132        | 0.655             | F | 0.0   | 1.0     | 0.0   | NA    |
|                                      | <i>Renal cell carcinoma</i>          | 1 | 267  | 270  | 1.228        | 0.854-1.767        | 0.268             | F | 0.0   | 1.0     | 0.0   | NA    |
|                                      | Genotyping method                    |   |      |      |              |                    |                   |   |       |         |       |       |
|                                      | <i>TaqMan PCR</i>                    | 3 | 1078 | 1381 | 0.441        | 0.160-1.212        | 0.112             | R | 28.86 | < 0.001 | 93.07 | 0.377 |
|                                      | <i>SNPlex technology</i>             | 2 | 972  | 977  | 0.989        | 0.687-1.425        | 0.955             | R | 2.955 | 0.086   | 66.16 | NA    |
|                                      | <i>Other methods</i>                 | 4 | 1218 | 1320 | 1.078        | 0.823-1.413        | 0.585             | F | 0.406 | 0.939   | 0.0   | 0.153 |
|                                      | Source of controls                   |   |      |      |              |                    |                   |   |       |         |       |       |
|                                      | <i>Population-based</i>              | 7 | 2492 | 2863 | 0.734        | 0.474-1.136        | 0.165             | R | 43.93 | < 0.001 | 86.34 | 0.604 |
|                                      | <i>Hospital-based</i>                | 2 | 776  | 815  | 1.043        | 0.761-1.431        | 0.792             | F | 0.145 | 0.704   | 0.0   | NA    |
|                                      | HWE in controls                      |   |      |      |              |                    |                   |   |       |         |       |       |
|                                      | <i>Equilibrium</i>                   | 8 | 3147 | 3518 | 0.935        | 0.815-1.073        | 0.340             | F | 9.974 | 0.190   | 29.82 | 0.673 |
|                                      | <i>Disequilibrium</i>                | 1 | 121  | 160  | <b>0.178</b> | <b>0.106-0.300</b> | <b>&lt; 0.001</b> | F | 0.0   | 1.0     | 0.0   | NA    |
|                                      | Quality score                        |   |      |      |              |                    |                   |   |       |         |       |       |
|                                      | <i>High quality</i>                  | 7 | 3049 | 3421 | 0.930        | 0.809-1.068        | 0.302             | F | 9.621 | 0.142   | 37.63 | 0.842 |
|                                      | <i>Low quality</i>                   | 2 | 219  | 257  | 0.451        | 0.068-3.007        | 0.411             | R | 12.69 | < 0.001 | 92.12 | NA    |

OR: odds ratio, CI: confidence interval, F: fixed model, R: random model, NA: not appreciable

Supplementary Table S15. Meta-analysis of the association between **DICER (T > C; rs1057035)** variant and cancer risk.

| Comparison                                         | Subgroups                  | No. of studies | Sample size |         | Test of association |                    |                   |       | Test of heterogeneity |         |                    | Publication bias  |  |
|----------------------------------------------------|----------------------------|----------------|-------------|---------|---------------------|--------------------|-------------------|-------|-----------------------|---------|--------------------|-------------------|--|
|                                                    |                            |                | Cancer      | Control | OR                  | 95% CI             | P-value           | Model | Q test                | P-value | I <sup>2</sup> (%) | P-value (Egger's) |  |
| <b>Allelic model</b><br>(C allele versus T allele) | <b>Overall</b>             | 11             | 13998       | 17974   | <b>0.887</b>        | <b>0.825-0.953</b> | <b>0.001</b>      | R     | 17.95                 | 0.056   | 44.29              | 0.618             |  |
|                                                    | <b>Geographical region</b> |                |             |         |                     |                    |                   |       |                       |         |                    |                   |  |
|                                                    | <i>Asian</i>               | 9              | 13394       | 16876   | <b>0.886</b>        | <b>0.827-0.949</b> | <b>0.001</b>      | R     | 8.730                 | 0.366   | 8.366              | 0.983             |  |
|                                                    | <i>European</i>            | 2              | 604         | 1098    | 0.994               | 0.527-1.876        | 0.985             | R     | 8.610                 | 0.003   | 88.39              | NA                |  |
|                                                    | <b>Cancer type</b>         |                |             |         |                     |                    |                   |       |                       |         |                    |                   |  |
|                                                    | <i>Head/Neck carcinoma</i> | 2              | 1938        | 4878    | <b>0.816</b>        | <b>0.685-0.972</b> | <b>0.023</b>      | F     | 0.152                 | 0.697   | 0.0                | NA                |  |
|                                                    | <i>HCC</i>                 | 2              | 3174        | 3318    | <b>0.802</b>        | <b>0.687-0.935</b> | <b>0.005</b>      | F     | 2.350                 | 0.125   | 57.44              | NA                |  |
|                                                    | <i>Bladder cancer</i>      | 1              | 1370        | 1460    | 1.022               | 0.808-1.292        | 0.857             | F     | 0.0                   | 1.0     | 0.0                | NA                |  |
|                                                    | <i>Breast cancer</i>       | 1              | 1696        | 1762    | 0.915               | 0.731-1.145        | 0.438             | F     | 0.0                   | 1.0     | 0.0                | NA                |  |
|                                                    | <i>Cervical carcinoma</i>  | 1              | 2950        | 3056    | 0.968               | 0.825-1.135        | 0.687             | F     | 0.0                   | 1.0     | 0.0                | NA                |  |
|                                                    | <i>CLL</i>                 | 1              | 208         | 692     | <b>1.379</b>        | <b>1.002-1.897</b> | <b>0.049</b>      | F     | 0.0                   | 1.0     | 0.0                | NA                |  |
|                                                    | <i>Colorectal cancer</i>   | 1              | 396         | 406     | <b>0.721</b>        | <b>0.538-0.966</b> | <b>0.028</b>      | F     | 0.0                   | 1.0     | 0.0                | NA                |  |
|                                                    | <i>ESCC</i>                | 1              | 1066        | 1202    | 0.947               | 0.793-1.131        | 0.550             | F     | 0.0                   | 1.0     | 0.0                | NA                |  |
|                                                    | <i>Lung cancer</i>         | 1              | 1200        | 1200    | 0.826               | 0.681-1.001        | 0.051             | F     | 0.0                   | 1.0     | 0.0                | NA                |  |
|                                                    | <b>Genotyping method</b>   |                |             |         |                     |                    |                   |       |                       |         |                    |                   |  |
|                                                    | <i>TaqMan PCR</i>          | 9              | 11782       | 13676   | 0.897               | 0.802-1.004        | 0.060             | R     | 17.24                 | 0.028   | 53.60              | 0.534             |  |
|                                                    | <i>Other methods</i>       | 2              | 2216        | 4298    | 0.905               | 0.787-1.041        | 0.164             | F     | 0.663                 | 0.416   | 0.0                | NA                |  |
|                                                    | <b>Source of controls</b>  |                |             |         |                     |                    |                   |       |                       |         |                    |                   |  |
|                                                    | <i>Population-based</i>    | 8              | 10804       | 14674   | <b>0.887</b>        | <b>0.789-0.997</b> | <b>0.044</b>      | R     | 15.66                 | 0.028   | 55.31              | 0.888             |  |
|                                                    | <i>Hospital-based</i>      | 3              | 3194        | 3300    | 0.914               | 0.801-1.044        | 0.186             | F     | 2.128                 | 0.345   | 6.005              | 0.470             |  |
|                                                    | <b>HWE in controls</b>     |                |             |         |                     |                    |                   |       |                       |         |                    |                   |  |
|                                                    | <i>Equilibrium</i>         | 10             | 12932       | 16772   | <b>0.891</b>        | <b>0.805-0.985</b> | <b>0.025</b>      | R     | 17.46                 | 0.042   | 48.46              | 0.523             |  |
|                                                    | <i>Disequilibrium</i>      | 1              | 1066        | 1202    | 0.947               | 0.793-1.131        | 0.550             | F     | 0.0                   | 1.0     | 0.0                | NA                |  |
|                                                    | <b>Quality score</b>       |                |             |         |                     |                    |                   |       |                       |         |                    |                   |  |
|                                                    | <i>High quality</i>        | 9              | 12402       | 16368   | 0.922               | 0.834-1.020        | 0.114             | R     | 14.82                 | 0.063   | 46.02              | 0.379             |  |
|                                                    | <i>Low quality</i>         | 2              | 1596        | 1606    | <b>0.793</b>        | <b>0.675-0.931</b> | <b>0.005</b>      | F     | 0.577                 | 0.447   | 0.0                | NA                |  |
| <b>Recessive model</b><br>(CC versus TT+TC)        | <b>Overall</b>             | 11             | 6999        | 8987    | 0.902               | 0.700-1.163        | 0.428             | R     | 22.35                 | 0.013   | 55.25              | 0.619             |  |
|                                                    | <b>Geographical region</b> |                |             |         |                     |                    |                   |       |                       |         |                    |                   |  |
|                                                    | <i>Asian</i>               | 9              | 6697        | 8438    | 0.893               | 0.690-1.156        | 0.389             | F     | 6.579                 | 0.583   | 0.0                | 0.908             |  |
|                                                    | <i>European</i>            | 2              | 302         | 549     | 1.279               | 0.293-5.583        | 0.744             | R     | 13.03                 | < 0.001 | 92.33              | NA                |  |
|                                                    | <b>Cancer type</b>         |                |             |         |                     |                    |                   |       |                       |         |                    |                   |  |
|                                                    | <i>Head/Neck carcinoma</i> | 2              | 969         | 2439    | 0.689               | 0.298-1.595        | 0.385             | F     | 0.239                 | 0.625   | 0.0                | NA                |  |
|                                                    | <i>HCC</i>                 | 2              | 1587        | 1659    | 0.971               | 0.581-1.623        | 0.911             | F     | 0.006                 | 0.941   | 0.0                | NA                |  |
|                                                    | <i>Bladder cancer</i>      | 1              | 685         | 730     | 2.297               | 0.985-5.357        | 0.054             | F     | 0.0                   | 1.0     | 0.0                | NA                |  |
|                                                    | <i>Breast cancer</i>       | 1              | 848         | 881     | 0.806               | 0.299-2.175        | 0.671             | F     | 0.0                   | 1.0     | 0.0                | NA                |  |
|                                                    | <i>Cervical carcinoma</i>  | 1              | 1475        | 1528    | 0.854               | 0.463-1.574        | 0.613             | F     | 0.0                   | 1.0     | 0.0                | NA                |  |
|                                                    | <i>CLL</i>                 | 1              | 104         | 346     | <b>2.702</b>        | <b>1.547-4.717</b> | <b>&lt; 0.001</b> | F     | 0.0                   | 1.0     | 0.0                | NA                |  |
|                                                    | <i>Colorectal cancer</i>   | 1              | 198         | 203     | 0.600               | 0.331-1.091        | 0.094             | F     | 0.0                   | 1.0     | 0.0                | NA                |  |
|                                                    | <i>ESCC</i>                | 1              | 533         | 601     | 0.561               | 0.140-2.256        | 0.416             | F     | 0.0                   | 1.0     | 0.0                | NA                |  |
|                                                    | <i>Lung cancer</i>         | 1              | 600         | 600     | 0.737               | 0.453-1.200        | 0.220             | F     | 0.0                   | 1.0     | 0.0                | NA                |  |
|                                                    | <b>Genotyping method</b>   |                |             |         |                     |                    |                   |       |                       |         |                    |                   |  |
|                                                    | <i>TaqMan PCR</i>          | 9              | 5891        | 6838    | 1.029               | 0.698-1.517        | 0.886             | R     | 21.40                 | 0.006   | 62.62              | 0.880             |  |
|                                                    | <i>Other methods</i>       | 2              | 1108        | 2149    | 0.703               | 0.312-1.585        | 0.395             | F     | 0.153                 | 0.696   | 0.0                | NA                |  |
|                                                    | <b>Source of controls</b>  |                |             |         |                     |                    |                   |       |                       |         |                    |                   |  |
|                                                    | <i>Population-based</i>    | 8              | 5402        | 7337    | 0.927               | 0.590-1.456        | 0.742             | R     | 17.10                 | 0.017   | 59.06              | 0.264             |  |
|                                                    | <i>Hospital-based</i>      | 3              | 1597        | 1650    | 1.095               | 0.575-2.086        | 0.782             | R     | 5.204                 | 0.074   | 61.57              | 0.362             |  |
|                                                    | <b>HWE in controls</b>     |                |             |         |                     |                    |                   |       |                       |         |                    |                   |  |
|                                                    | <i>Equilibrium</i>         | 10             | 6466        | 8386    | 1.009               | 0.704-1.447        | 0.960             | R     | 21.66                 | 0.010   | 58.45              | 0.792             |  |
|                                                    | <i>Disequilibrium</i>      | 1              | 533         | 601     | 0.561               | 0.140-2.256        | 0.416             | F     | 0.0                   | 1.0     | 0.0                | NA                |  |
|                                                    | <b>Quality score</b>       |                |             |         |                     |                    |                   |       |                       |         |                    |                   |  |
|                                                    | <i>High quality</i>        | 9              | 6201        | 8184    | 1.117               | 0.750-1.662        | 0.587             | R     | 15.91                 | 0.044   | 49.73              | 0.112             |  |
|                                                    | <i>Low quality</i>         | 2              | 798         | 803     | <b>0.679</b>        | <b>0.465-0.990</b> | <b>0.044</b>      | F     | 0.271                 | 0.603   | 0.0                | NA                |  |
| <b>Dominant model</b><br>(TC+CC versus TT)         | <b>Overall</b>             | 11             | 6999        | 8987    | <b>0.861</b>        | <b>0.798-0.929</b> | <b>&lt; 0.001</b> | F     | 10.13                 | 0.429   | 1.284              | 0.983             |  |
|                                                    | <b>Geographical region</b> |                |             |         |                     |                    |                   |       |                       |         |                    |                   |  |
|                                                    | <i>Asian</i>               | 9              | 6697        | 8438    | <b>0.864</b>        | <b>0.799-0.934</b> | <b>&lt; 0.001</b> | F     | 8.271                 | 0.407   | 3.275              | 0.893             |  |
|                                                    | <i>European</i>            | 2              | 302         | 549     | 0.828               | 0.616-1.111        | 0.209             | F     | 1.785                 | 0.182   | 43.98              | NA                |  |
|                                                    | <b>Cancer type</b>         |                |             |         |                     |                    |                   |       |                       |         |                    |                   |  |
|                                                    | <i>Head/Neck carcinoma</i> | 2              | 969         | 2439    | <b>0.805</b>        | <b>0.667-0.971</b> | <b>0.024</b>      | F     | 0.122                 | 0.727   | 0.0                | NA                |  |
|                                                    | <i>HCC</i>                 | 2              | 1587        | 1659    | <b>0.765</b>        | <b>0.645-0.907</b> | <b>0.002</b>      | F     | 2.603                 | 0.107   | 61.58              | NA                |  |
|                                                    | <i>Bladder cancer</i>      | 1              | 685         | 730     | 0.943               | 0.728-1.221        | 0.655             | F     | 0.0                   | 1.0     | 0.0                | NA                |  |
|                                                    | <i>Breast cancer</i>       | 1              | 848         | 881     | 0.913               | 0.717-1.164        | 0.464             | F     | 0.0                   | 1.0     | 0.0                | NA                |  |
|                                                    | <i>Cervical carcinoma</i>  | 1              | 1475        | 1528    | 0.974               | 0.818-1.160        | 0.767             | F     | 0.0                   | 1.0     | 0.0                | NA                |  |
|                                                    | <i>CLL</i>                 | 1              | 104         | 346     | 1.035               | 0.666-1.609        | 0.878             | F     | 0.0                   | 1.0     | 0.0                | NA                |  |



|                                      |                            |    |      |      |              |                    |                   |   |       |       |       |       |
|--------------------------------------|----------------------------|----|------|------|--------------|--------------------|-------------------|---|-------|-------|-------|-------|
|                                      | <i>Colorectal cancer</i>   | 1  | 198  | 203  | 0.691        | 0.465-1.027        | 0.068             | F | 0.0   | 1.0   | 0.0   | NA    |
|                                      | <i>ESCC</i>                | 1  | 533  | 601  | 0.922        | 0.725-1.173        | 0.511             | F | 0.0   | 1.0   | 0.0   | NA    |
|                                      | <i>Lung cancer</i>         | 1  | 600  | 600  | 0.811        | 0.643-1.022        | 0.076             | F | 0.0   | 1.0   | 0.0   | NA    |
|                                      | Genotyping method          |    |      |      |              |                    |                   |   |       |       |       |       |
|                                      | <i>TaqMan PCR</i>          | 9  | 5891 | 6838 | <b>0.858</b> | <b>0.789-0.933</b> | <b>&lt; 0.001</b> | F | 9.707 | 0.286 | 17.59 | 0.977 |
|                                      | <i>Other methods</i>       | 2  | 1108 | 2149 | 0.875        | 0.737-1.039        | 0.127             | F | 0.383 | 0.536 | 0.0   | NA    |
|                                      | Source of controls         |    |      |      |              |                    |                   |   |       |       |       |       |
|                                      | <i>Population-based</i>    | 8  | 5402 | 7337 | <b>0.853</b> | <b>0.782-0.930</b> | <b>&lt; 0.001</b> | F | 8.831 | 0.265 | 20.74 | 0.779 |
|                                      | <i>Hospital-based</i>      | 3  | 1597 | 1650 | 0.888        | 0.761-1.036        | 0.132             | F | 1.093 | 0.579 | 0.0   | 0.423 |
|                                      | HWE in controls            |    |      |      |              |                    |                   |   |       |       |       |       |
|                                      | <i>Equilibrium</i>         | 10 | 6466 | 8386 | <b>0.855</b> | <b>0.789-0.925</b> | <b>&lt; 0.001</b> | F | 9.780 | 0.369 | 7.978 | 0.979 |
|                                      | <i>Disequilibrium</i>      | 1  | 533  | 601  | 0.922        | 0.725-1.173        | 0.511             | F | 0.0   | 1.0   | 0.0   | NA    |
|                                      | Quality score              |    |      |      |              |                    |                   |   |       |       |       |       |
|                                      | <i>High quality</i>        | 9  | 6201 | 8184 | <b>0.867</b> | <b>0.807-0.950</b> | <b>0.001</b>      | F | 8.521 | 0.384 | 6.114 | 0.589 |
|                                      | <i>Low quality</i>         | 2  | 798  | 803  | <b>0.778</b> | <b>0.637-0.951</b> | <b>0.014</b>      | F | 0.463 | 0.496 | 0.0   | NA    |
| Homozygote model<br>(CC versus TT)   | Overall                    | 11 | 5366 | 6678 | 0.868        | 0.672-1.121        | 0.278             | R | 19.38 | 0.036 | 48.39 | 0.741 |
|                                      | Geographical region        |    |      |      |              |                    |                   |   |       |       |       |       |
|                                      | <i>Asian</i>               | 9  | 5178 | 6372 | 0.861        | 0.664-1.117        | 0.260             | F | 6.819 | 0.556 | 0.0   | 0.927 |
|                                      | <i>European</i>            | 2  | 188  | 306  | 1.103        | 0.255-4.771        | 0.895             | R | 11.33 | 0.001 | 91.17 | NA    |
|                                      | Cancer type                |    |      |      |              |                    |                   |   |       |       |       |       |
|                                      | <i>Head/Neck carcinoma</i> | 2  | 796  | 1929 | 0.663        | 0.286-1.535        | 0.337             | F | 0.256 | 0.613 | 0.0   | NA    |
|                                      | <i>HCC</i>                 | 2  | 1312 | 1299 | 0.934        | 0.558-1.563        | 0.794             | F | 0.002 | 0.966 | 0.0   | NA    |
|                                      | <i>Bladder cancer</i>      | 1  | 565  | 585  | 2.237        | 0.958-5.227        | 0.063             | F | 0.0   | 1.0   | 0.0   | NA    |
|                                      | <i>Breast cancer</i>       | 1  | 703  | 720  | 0.795        | 0.294-2.145        | 0.650             | F | 0.0   | 1.0   | 0.0   | NA    |
|                                      | <i>Cervical carcinoma</i>  | 1  | 1182 | 1221 | 0.851        | 0.461-1.571        | 0.606             | F | 0.0   | 1.0   | 0.0   | NA    |
|                                      | <i>CLL</i>                 | 1  | 72   | 194  | <b>2.320</b> | <b>1.277-4.217</b> | <b>0.006</b>      | F | 0.0   | 1.0   | 0.0   | NA    |
|                                      | <i>Colorectal cancer</i>   | 1  | 116  | 112  | <b>0.521</b> | <b>0.277-0.980</b> | <b>0.043</b>      | F | 0.0   | 1.0   | 0.0   | NA    |
|                                      | <i>ESCC</i>                | 1  | 210  | 228  | 0.536        | 0.132-2.172        | 0.383             | F | 0.0   | 1.0   | 0.0   | NA    |
|                                      | <i>Lung cancer</i>         | 1  | 410  | 390  | 0.691        | 0.421-1.133        | 0.143             | F | 0.0   | 1.0   | 0.0   | NA    |
|                                      | Genotyping method          |    |      |      |              |                    |                   |   |       |       |       |       |
|                                      | <i>TaqMan PCR</i>          | 9  | 4679 | 5208 | 0.964        | 0.666-1.395        | 0.846             | R | 18.59 | 0.017 | 56.96 | 0.981 |
|                                      | <i>Other methods</i>       | 2  | 687  | 1470 | 0.677        | 0.300-1.530        | 0.348             | F | 0.162 | 0.688 | 0.0   | NA    |
|                                      | Source of controls         |    |      |      |              |                    |                   |   |       |       |       |       |
|                                      | <i>Population-based</i>    | 8  | 4158 | 5465 | 0.870        | 0.575-1.317        | 0.512             | R | 13.87 | 0.053 | 49.55 | 0.310 |
|                                      | <i>Hospital-based</i>      | 3  | 1208 | 1213 | 1.063        | 0.545-2.072        | 0.858             | R | 5.500 | 0.064 | 63.63 | 0.336 |
|                                      | HWE in controls            |    |      |      |              |                    |                   |   |       |       |       |       |
|                                      | <i>Equilibrium</i>         | 10 | 5156 | 6450 | 0.948        | 0.674-1.333        | 0.758             | R | 18.77 | 0.027 | 52.05 | 0.939 |
|                                      | <i>Disequilibrium</i>      | 1  | 210  | 228  | 0.536        | 0.132-2.172        | 0.383             | F | 0.0   | 1.0   | 0.0   | NA    |
|                                      | Quality score              |    |      |      |              |                    |                   |   |       |       |       |       |
|                                      | <i>High quality</i>        | 9  | 4840 | 6176 | 1.130        | 0.861-1.482        | 0.379             | F | 12.79 | 0.119 | 37.47 | 0.148 |
|                                      | <i>Low quality</i>         | 2  | 526  | 502  | <b>0.621</b> | <b>0.420-0.916</b> | <b>0.016</b>      | F | 0.475 | 0.491 | 0.0   | NA    |
| Heterozygote model<br>(TC versus TT) | Overall                    | 11 | 6841 | 8774 | <b>0.854</b> | <b>0.790-0.923</b> | <b>&lt; 0.001</b> | F | 9.148 | 0.518 | 0.0   | 0.510 |
|                                      | Geographical region        |    |      |      |              |                    |                   |   |       |       |       |       |
|                                      | <i>Asian</i>               | 9  | 6585 | 8295 | <b>0.862</b> | <b>0.795-0.934</b> | <b>&lt; 0.001</b> | F | 8.251 | 0.409 | 3.040 | 0.943 |
|                                      | <i>European</i>            | 2  | 256  | 479  | 0.735        | 0.533-1.016        | 0.062             | F | 0.023 | 0.880 | 0.0   | NA    |
|                                      | Cancer type                |    |      |      |              |                    |                   |   |       |       |       |       |
|                                      | <i>Head/Neck carcinoma</i> | 2  | 962  | 2413 | <b>0.812</b> | <b>0.671-0.984</b> | <b>0.033</b>      | F | 0.078 | 0.779 | 0.0   | NA    |
|                                      | <i>HCC</i>                 | 2  | 1558 | 1628 | 0.797        | 0.570-1.114        | 0.185             | R | 2.728 | 0.099 | 63.35 | NA    |
|                                      | <i>Bladder cancer</i>      | 1  | 668  | 722  | 0.871        | 0.666-1.140        | 0.315             | F | 0.0   | 1.0   | 0.0   | NA    |
|                                      | <i>Breast cancer</i>       | 1  | 841  | 872  | 0.920        | 0.718-1.178        | 0.509             | F | 0.0   | 1.0   | 0.0   | NA    |
|                                      | <i>Cervical carcinoma</i>  | 1  | 1456 | 1505 | 0.983        | 0.822-1.176        | 0.852             | F | 0.0   | 1.0   | 0.0   | NA    |
|                                      | <i>CLL</i>                 | 1  | 78   | 308  | 0.714        | 0.432-1.181        | 0.190             | F | 0.0   | 1.0   | 0.0   | NA    |
|                                      | <i>Colorectal cancer</i>   | 1  | 178  | 171  | 0.751        | 0.493-1.144        | 0.182             | F | 0.0   | 1.0   | 0.0   | NA    |
|                                      | <i>ESCC</i>                | 1  | 530  | 595  | 0.929        | 0.730-1.182        | 0.547             | F | 0.0   | 1.0   | 0.0   | NA    |
|                                      | <i>Lung cancer</i>         | 1  | 570  | 560  | 0.833        | 0.653-1.064        | 0.143             | F | 0.0   | 1.0   | 0.0   | NA    |
|                                      | Genotyping method          |    |      |      |              |                    |                   |   |       |       |       |       |
|                                      | <i>TaqMan PCR</i>          | 9  | 5741 | 6648 | <b>0.848</b> | <b>0.777-0.925</b> | <b>&lt; 0.001</b> | F | 8.610 | 0.376 | 7.080 | 0.571 |
|                                      | <i>Other methods</i>       | 2  | 1100 | 2126 | 0.881        | 0.740-1.048        | 0.152             | F | 0.390 | 0.532 | 0.0   | NA    |
|                                      | Source of controls         |    |      |      |              |                    |                   |   |       |       |       |       |
|                                      | <i>Population-based</i>    | 8  | 5304 | 7186 | <b>0.848</b> | <b>0.776-0.927</b> | <b>&lt; 0.001</b> | F | 8.496 | 0.291 | 17.60 | 0.379 |
|                                      | <i>Hospital-based</i>      | 3  | 1537 | 1588 | 0.875        | 0.745-1.028        | 0.105             | F | 0.540 | 0.763 | 0.0   | 0.052 |
|                                      | HWE in controls            |    |      |      |              |                    |                   |   |       |       |       |       |
|                                      | <i>Equilibrium</i>         | 10 | 6311 | 8179 | <b>0.846</b> | <b>0.779-0.918</b> | <b>&lt; 0.001</b> | F | 0.630 | 0.472 | 0.0   | 0.543 |
|                                      | <i>Disequilibrium</i>      | 1  | 530  | 595  | 0.929        | 0.730-1.182        | 0.547             | F | 0.0   | 1.0   | 0.0   | NA    |
|                                      | Quality score              |    |      |      |              |                    |                   |   |       |       |       |       |
|                                      | <i>High quality</i>        | 9  | 6093 | 8043 | <b>0.861</b> | <b>0.792-0.936</b> | <b>&lt; 0.001</b> | F | 8.714 | 0.367 | 8.199 | 0.705 |
|                                      | <i>Low quality</i>         | 2  | 748  | 731  | 0.812        | 0.657-1.003        | 0.053             | F | 0.176 | 0.675 | 0.0   | NA    |

OR: odds ratio, CI: confidence interval, F: fixed model, R: random model, NA: not appreciable

Supplementary Table S16. Meta-analysis of the association between **DICER (A > G; rs3742330)** variant and cancer risk.

| Comparison                                  | Subgroups                     | No. of studies | Sample size |         | Test of association |             |         |       | Test of heterogeneity |         |                    | Publication bias  |  |
|---------------------------------------------|-------------------------------|----------------|-------------|---------|---------------------|-------------|---------|-------|-----------------------|---------|--------------------|-------------------|--|
|                                             |                               |                | Cancer      | Control | OR                  | 95% CI      | P-value | Model | Q test                | P-value | I <sup>2</sup> (%) | P-value (Egger's) |  |
| Allelic model<br>(G allele versus A allele) | Overall                       | 16             | 11554       | 15586   | 0.974               | 0.889-1.066 | 0.562   | R     | 34.92                 | 0.003   | 57.04              | 0.942             |  |
|                                             | Geographical region           |                |             |         |                     |             |         |       |                       |         |                    |                   |  |
|                                             | Asian                         | 10             | 8074        | 11390   | 0.945               | 0.846-1.054 | 0.309   | R     | 25.55                 | 0.002   | 64.78              | 0.861             |  |
|                                             | European                      | 2              | 952         | 976     | 1.212               | 0.949-1.548 | 0.124   | F     | 1.615                 | 0.204   | 38.07              | NA                |  |
|                                             | American                      | 3              | 2368        | 3062    | 1.026               | 0.844-1.247 | 0.796   | F     | 1.829                 | 0.401   | 0.0                | 0.012             |  |
|                                             | Turkish                       | 1              | 160         | 158     | 0.626               | 0.333-1.174 | 0.144   | F     | 0.0                   | 1.0     | 0.0                | NA                |  |
|                                             | Cancer type                   |                |             |         |                     |             |         |       |                       |         |                    |                   |  |
|                                             | Colorectal cancer             | 2              | 2216        | 3600    | 1.002               | 0.822-1.220 | 0.987   | R     | 2.850                 | 0.091   | 64.92              | NA                |  |
|                                             | Bladder cancer                | 2              | 2820        | 2902    | 1.034               | 0.905-1.182 | 0.619   | F     | 0.889                 | 0.346   | 0.0                | NA                |  |
|                                             | PTC                           | 1              | 240         | 260     | 0.553               | 0.342-0.894 | 0.016   | F     | 0.0                   | 1.0     | 0.0                | NA                |  |
|                                             | Endometrial cancer            | 1              | 160         | 158     | 0.626               | 0.333-1.174 | 0.144   | F     | 0.0                   | 1.0     | 0.0                | NA                |  |
|                                             | Cervical precancerous lesions | 1              | 592         | 592     | 0.730               | 0.578-0.924 | 0.009   | F     | 0.0                   | 1.0     | 0.0                | NA                |  |
|                                             | Gastric cancer                | 1              | 1256        | 1004    | 0.762               | 0.642-0.905 | 0.002   | F     | 0.0                   | 1.0     | 0.0                | NA                |  |
|                                             | Prostate cancer               | 1              | 706         | 636     | 1.029               | 0.723-1.462 | 0.875   | F     | 0.0                   | 1.0     | 0.0                | NA                |  |
|                                             | Head/neck carcinoma           | 1              | 1150        | 3102    | 0.998               | 0.867-1.149 | 0.979   | F     | 0.0                   | 1.0     | 0.0                | NA                |  |
|                                             | NHL                           | 1              | 360         | 1058    | 0.883               | 0.580-1.345 | 0.563   | F     | 0.0                   | 1.0     | 0.0                | NA                |  |
|                                             | HCC                           | 1              | 294         | 418     | 1.020               | 0.755-1.378 | 0.900   | F     | 0.0                   | 1.0     | 0.0                | NA                |  |
|                                             | Larynx cancer                 | 1              | 246         | 340     | 1.413               | 1.005-1.987 | 0.047   | F     | 0.0                   | 1.0     | 0.0                | NA                |  |
|                                             | Esophageal cancer             | 1              | 760         | 760     | 1.117               | 0.909-1.373 | 0.293   | F     | 0.0                   | 1.0     | 0.0                | NA                |  |
|                                             | Lung cancer                   | 1              | 200         | 200     | 1.359               | 0.914-2.023 | 0.130   | F     | 0.0                   | 1.0     | 0.0                | NA                |  |
|                                             | Renal cell carcinoma          | 1              | 554         | 556     | 0.863               | 0.555-1.341 | 0.512   | F     | 0.0                   | 1.0     | 0.0                | NA                |  |
|                                             | Genotyping method             |                |             |         |                     |             |         |       |                       |         |                    |                   |  |
|                                             | TaqMan PCR                    | 3              | 1772        | 1952    | 1.029               | 0.736-1.440 | 0.867   | R     | 5.913                 | 0.052   | 66.18              | 0.942             |  |
|                                             | RFLP-PCR                      | 3              | 1350        | 1478    | 0.915               | 0.652-1.283 | 0.605   | R     | 7.180                 | 0.028   | 72.14              | 0.207             |  |
|                                             | Mass spectrometry             | 3              | 1552        | 1552    | 1.013               | 0.716-1.434 | 0.942   | R     | 10.17                 | 0.006   | 80.34              | 0.766             |  |
|                                             | HRMA                          | 2              | 1962        | 1640    | 0.808               | 0.692-0.942 | 0.007   | F     | 2.249                 | 0.134   | 55.53              | NA                |  |
|                                             | SNPlex technology             | 2              | 2008        | 2004    | 1.069               | 0.858-1.332 | 0.552   | F     | 1.208                 | 0.272   | 17.19              | NA                |  |
|                                             | Other methods                 | 3              | 2910        | 6960    | 0.950               | 0.866-1.043 | 0.281   | F     | 0.860                 | 0.651   | 0.0                | 0.812             |  |
|                                             | Source of controls            |                |             |         |                     |             |         |       |                       |         |                    |                   |  |
|                                             | Population-based              | 8              | 4542        | 6664    | 0.959               | 0.820-1.123 | 0.606   | R     | 17.97                 | 0.012   | 61.04              | 0.606             |  |
|                                             | Hospital-based                | 8              | 7012        | 8922    | 0.969               | 0.854-1.100 | 0.628   | R     | 16.76                 | 0.019   | 58.24              | 0.752             |  |
|                                             | HWE in controls               |                |             |         |                     |             |         |       |                       |         |                    |                   |  |
|                                             | Equilibrium                   | 13             | 10556       | 14496   | 0.978               | 0.894-1.069 | 0.624   | R     | 22.85                 | 0.029   | 47.48              | 0.933             |  |
|                                             | Disequilibrium                | 3              | 998         | 1090    | 0.888               | 0.539-1.464 | 0.642   | R     | 10.96                 | 0.004   | 81.76              | 0.936             |  |
|                                             | Quality score                 |                |             |         |                     |             |         |       |                       |         |                    |                   |  |
|                                             | High quality                  | 11             | 9482        | 13492   | 0.922               | 0.835-1.018 | 0.110   | R     | 22.13                 | 0.014   | 54.81              | 0.467             |  |
|                                             | Low quality                   | 4              | 1312        | 1334    | 1.168               | 0.958-1.423 | 0.124   | F     | 6.041                 | 0.110   | 50.34              | 0.220             |  |
| Recessive model<br>(GG versus AA+AG)        | Overall                       | 16             | 5777        | 7793    | 0.892               | 0.794-1.003 | 0.055   | F     | 12.88                 | 0.611   | 0.0                | 0.308             |  |
|                                             | Geographical region           |                |             |         |                     |             |         |       |                       |         |                    |                   |  |
|                                             | Asian                         | 10             | 4037        | 5695    | 0.894               | 0.795-1.007 | 0.064   | F     | 8.874                 | 0.449   | 0.0                | 0.590             |  |
|                                             | European                      | 2              | 476         | 488     | 0.710               | 0.245-2.058 | 0.528   | F     | 1.247                 | 0.264   | 19.80              | NA                |  |
|                                             | American                      | 3              | 1184        | 1531    | 1.260               | 0.481-3.302 | 0.638   | F     | 0.104                 | 0.949   | 0.0                | 0.167             |  |
|                                             | Turkish                       | 1              | 80          | 79      | 0.187               | 0.021-1.641 | 0.130   | F     | 0.0                   | 1.0     | 0.0                | NA                |  |
|                                             | Cancer type                   |                |             |         |                     |             |         |       |                       |         |                    |                   |  |
|                                             | Colorectal cancer             | 2              | 1108        | 1800    | 0.983               | 0.810-1.194 | 0.863   | F     | 0.028                 | 0.866   | 0.0                | NA                |  |
|                                             | Bladder cancer                | 2              | 1410        | 1451    | 0.886               | 0.644-1.220 | 0.459   | F     | 0.651                 | 0.420   | 0.0                | NA                |  |
|                                             | PTC                           | 1              | 120         | 130     | 0.298               | 0.061-1.463 | 0.136   | F     | 0.0                   | 1.0     | 0.0                | NA                |  |
|                                             | Endometrial cancer            | 1              | 80          | 79      | 0.187               | 0.021-1.641 | 0.130   | F     | 0.0                   | 1.0     | 0.0                | NA                |  |
|                                             | Cervical precancerous lesions | 1              | 296         | 296     | 1.000               | 0.638-1.566 | 1.000   | F     | 0.0                   | 1.0     | 0.0                | NA                |  |
|                                             | Gastric cancer                | 1              | 628         | 502     | 0.683               | 0.484-0.963 | 0.030   | F     | 0.0                   | 1.0     | 0.0                | NA                |  |
|                                             | Prostate cancer               | 1              | 353         | 318     | 0.899               | 0.287-2.817 | 0.855   | F     | 0.0                   | 1.0     | 0.0                | NA                |  |
|                                             | Head/neck carcinoma           | 1              | 575         | 1551    | 0.789               | 0.584-1.067 | 0.124   | F     | 0.0                   | 1.0     | 0.0                | NA                |  |
|                                             | NHL                           | 1              | 180         | 529     | 0.980               | 0.101-9.477 | 0.986   | F     | 0.0                   | 1.0     | 0.0                | NA                |  |
|                                             | HCC                           | 1              | 147         | 209     | 0.738               | 0.422-1.290 | 0.286   | F     | 0.0                   | 1.0     | 0.0                | NA                |  |
|                                             | Larynx cancer                 | 1              | 123         | 170     | 0.150               | 0.008-2.808 | 0.204   | F     | 0.0                   | 1.0     | 0.0                | NA                |  |
|                                             | Esophageal cancer             | 1              | 380         | 380     | 1.092               | 0.724-1.646 | 0.675   | F     | 0.0                   | 1.0     | 0.0                | NA                |  |
|                                             | Lung cancer                   | 1              | 100         | 100     | 1.346               | 0.683-2.653 | 0.390   | F     | 0.0                   | 1.0     | 0.0                | NA                |  |
|                                             | Renal cell carcinoma          | 1              | 277         | 278     | 1.004               | 0.062-16.13 | 0.998   | F     | 0.0                   | 1.0     | 0.0                | NA                |  |
|                                             | Genotyping method             |                |             |         |                     |             |         |       |                       |         |                    |                   |  |
|                                             | TaqMan PCR                    | 3              | 886         | 976     | 0.807               | 0.582-1.119 | 0.198   | F     | 3.116                 | 0.211   | 35.82              | 0.067             |  |
|                                             | RFLP-PCR                      | 3              | 675         | 739     | 0.887               | 0.661-1.190 | 0.424   | F     | 2.728                 | 0.256   | 26.68              | 0.124             |  |
|                                             | Mass spectrometry             | 3              | 776         | 776     | 1.093               | 0.829-1.442 | 0.527   | F     | 0.513                 | 0.774   | 0.0                | 0.375             |  |
|                                             | HRMA                          | 2              | 981         | 820     | 0.698               | 0.502-0.971 | 0.033   | F     | 0.205                 | 0.651   | 0.0                | NA                |  |
|                                             | SNPlex technology             | 2              | 1004        | 1002    | 1.332               | 0.459-3.860 | 0.598   | F     | 0.047                 | 0.829   | 0.0                | NA                |  |

|                                     |                               |    |      |      |       |             |         |   |       |         |       |       |
|-------------------------------------|-------------------------------|----|------|------|-------|-------------|---------|---|-------|---------|-------|-------|
| Dominant model<br>(AG+GG versus AA) | Other methods                 | 3  | 1455 | 3480 | 0.900 | 0.750-1.081 | 0.261   | F | 1.164 | 0.559   | 0.0   | 0.913 |
|                                     | Source of controls            |    |      |      |       |             |         |   |       |         |       |       |
|                                     | Population-based              | 8  | 2271 | 3332 | 0.865 | 0.712-1.051 | 0.144   | F | 5.418 | 0.609   | 0.0   | 0.249 |
|                                     | Hospital-based                | 8  | 3506 | 4461 | 0.908 | 0.785-1.050 | 0.193   | F | 7.312 | 0.397   | 4.265 | 0.857 |
|                                     | HWE in controls               |    |      |      |       |             |         |   |       |         |       |       |
|                                     | Equilibrium                   | 13 | 5278 | 7248 | 0.892 | 0.791-1.007 | 0.064   | F | 9.225 | 0.684   | 0.0   | 0.956 |
|                                     | Disequilibrium                | 3  | 499  | 545  | 0.897 | 0.581-1.385 | 0.623   | F | 3.658 | 0.161   | 45.33 | 0.079 |
|                                     | Quality score                 |    |      |      |       |             |         |   |       |         |       |       |
|                                     | High quality                  | 11 | 4741 | 6746 | 0.871 | 0.769-0.987 | 0.030   | F | 6.992 | 0.726   | 0.0   | 0.650 |
|                                     | Low quality                   | 4  | 656  | 667  | 0.996 | 0.573-1.732 | 0.990   | F | 4.670 | 0.198   | 35.76 | 0.017 |
|                                     | Overall                       | 16 | 5777 | 7793 | 0.979 | 0.856-1.120 | 0.761   | R | 51.99 | < 0.001 | 71.15 | 0.758 |
|                                     | Geographical region           |    |      |      |       |             |         |   |       |         |       |       |
|                                     | Asian                         | 10 | 4037 | 5695 | 0.949 | 0.788-1.143 | 0.581   | R | 36.92 | < 0.001 | 75.62 | 0.980 |
|                                     | European                      | 2  | 476  | 488  | 1.602 | 0.668-3.841 | 0.291   | R | 6.784 | 0.009   | 85.26 | NA    |
|                                     | American                      | 3  | 1184 | 1531 | 1.019 | 0.827-1.254 | 0.863   | F | 1.837 | 0.399   | 0.0   | 0.004 |
|                                     | Turkish                       | 1  | 80   | 79   | 0.707 | 0.346-1.445 | 0.342   | F | 0.0   | 1.0     | 0.0   | NA    |
|                                     | Cancer type                   |    |      |      |       |             |         |   |       |         |       |       |
|                                     | Colorectal cancer             | 2  | 1108 | 1800 | 1.026 | 0.678-1.553 | 0.904   | R | 5.623 | 0.018   | 82.22 | NA    |
|                                     | Bladder cancer                | 2  | 1410 | 1451 | 1.089 | 0.922-1.286 | 0.315   | F | 0.243 | 0.622   | 0.0   | NA    |
|                                     | PTC                           | 1  | 120  | 130  | 0.544 | 0.314-0.943 | 0.030   | F | 0.0   | 1.0     | 0.0   | NA    |
|                                     | Endometrial cancer            | 1  | 80   | 79   | 0.707 | 0.346-1.445 | 0.342   | F | 0.0   | 1.0     | 0.0   | NA    |
|                                     | Cervical precancerous lesions | 1  | 296  | 296  | 0.528 | 0.377-0.740 | < 0.001 | F | 0.0   | 1.0     | 0.0   | NA    |
|                                     | Gastric cancer                | 1  | 628  | 502  | 0.708 | 0.556-0.902 | 0.005   | F | 0.0   | 1.0     | 0.0   | NA    |
|                                     | Prostate cancer               | 1  | 353  | 318  | 1.047 | 0.711-1.543 | 0.815   | F | 0.0   | 1.0     | 0.0   | NA    |
|                                     | Head/neck carcinoma           | 1  | 575  | 1551 | 1.105 | 0.909-1.344 | 0.316   | F | 0.0   | 1.0     | 0.0   | NA    |
|                                     | NHL                           | 1  | 180  | 529  | 0.869 | 0.555-1.361 | 0.539   | F | 0.0   | 1.0     | 0.0   | NA    |
|                                     | HCC                           | 1  | 147  | 209  | 1.286 | 0.813-2.034 | 0.282   | F | 0.0   | 1.0     | 0.0   | NA    |
|                                     | Larynx cancer                 | 1  | 123  | 170  | 2.560 | 1.477-4.436 | 0.001   | F | 0.0   | 1.0     | 0.0   | NA    |
|                                     | Esophageal cancer             | 1  | 380  | 380  | 1.201 | 0.892-1.615 | 0.227   | F | 0.0   | 1.0     | 0.0   | NA    |
|                                     | Lung cancer                   | 1  | 100  | 100  | 1.547 | 0.865-2.767 | 0.142   | F | 0.0   | 1.0     | 0.0   | NA    |
|                                     | Renal cell carcinoma          | 1  | 277  | 278  | 0.848 | 0.533-1.351 | 0.489   | F | 0.0   | 1.0     | 0.0   | NA    |
|                                     | Genotyping method             |    |      |      |       |             |         |   |       |         |       |       |
|                                     | TaqMan PCR                    | 3  | 886  | 976  | 1.256 | 0.666-2.367 | 0.482   | R | 10.56 | 0.005   | 81.06 | 0.798 |
|                                     | RFLP-PCR                      | 3  | 675  | 739  | 1.005 | 0.617-1.636 | 0.984   | R | 7.845 | 0.020   | 74.50 | 0.458 |
|                                     | Mass spectrometry             | 3  | 776  | 776  | 0.971 | 0.512-1.838 | 0.927   | R | 16.55 | < 0.001 | 87.91 | 0.819 |
|                                     | HRMA                          | 2  | 981  | 820  | 0.835 | 0.572-1.220 | 0.352   | R | 2.824 | 0.093   | 64.59 | NA    |
|                                     | SNPlex technology             | 2  | 1004 | 1002 | 1.064 | 0.841-1.346 | 0.605   | F | 1.221 | 0.269   | 18.10 | NA    |
|                                     | Other methods                 | 3  | 1455 | 3480 | 0.954 | 0.837-1.088 | 0.485   | F | 3.952 | 0.139   | 49.39 | 0.875 |
|                                     | Source of controls            |    |      |      |       |             |         |   |       |         |       |       |
|                                     | Population-based              | 8  | 2271 | 3332 | 1.005 | 0.755-1.339 | 0.970   | R | 33.81 | < 0.001 | 79.30 | 0.910 |
|                                     | Hospital-based                | 8  | 3506 | 4461 | 0.978 | 0.823-1.162 | 0.801   | R | 17.63 | 0.014   | 60.30 | 0.626 |
|                                     | HWE in controls               |    |      |      |       |             |         |   |       |         |       |       |
|                                     | Equilibrium                   | 13 | 5278 | 7248 | 1.005 | 0.884-1.141 | 0.943   | R | 26.39 | 0.009   | 54.53 | 0.831 |
|                                     | Disequilibrium                | 3  | 499  | 545  | 0.979 | 0.353-2.711 | 0.967   | R | 23.13 | < 0.001 | 91.35 | 0.620 |
|                                     | Quality score                 |    |      |      |       |             |         |   |       |         |       |       |
|                                     | High quality                  | 11 | 4741 | 6746 | 0.910 | 0.773-1.072 | 0.261   | R | 33.94 | < 0.001 | 70.54 | 0.495 |
|                                     | Low quality                   | 4  | 656  | 667  | 1.329 | 0.805-2.192 | 0.266   | R | 10.16 | 0.017   | 70.47 | 0.919 |
| Homozygote model<br>(GG versus AA)  | Overall                       | 16 | 3525 | 4713 | 0.878 | 0.774-0.998 | 0.046   | F | 18.31 | 0.247   | 18.08 | 0.644 |
|                                     | Geographical region           |    |      |      |       |             |         |   |       |         |       |       |
|                                     | Asian                         | 10 | 2157 | 3042 | 0.886 | 0.740-1.060 | 0.187   | R | 15.08 | 0.089   | 40.32 | 0.940 |
|                                     | European                      | 2  | 314  | 332  | 0.787 | 0.271-2.288 | 0.660   | F | 0.468 | 0.494   | 0.0   | NA    |
|                                     | American                      | 3  | 991  | 1278 | 1.269 | 0.484-3.329 | 0.628   | F | 0.134 | 0.935   | 0.0   | 0.164 |
|                                     | Turkish                       | 1  | 63   | 61   | 0.181 | 0.020-1.594 | 0.123   | F | 0.0   | 1.0     | 0.0   | NA    |
|                                     | Cancer type                   |    |      |      |       |             |         |   |       |         |       |       |
|                                     | Colorectal cancer             | 2  | 576  | 922  | 0.957 | 0.769-1.191 | 0.693   | F | 1.648 | 0.199   | 39.32 | NA    |
|                                     | Bladder cancer                | 2  | 974  | 1029 | 0.930 | 0.666-1.301 | 0.673   | F | 0.579 | 0.447   | 0.0   | NA    |
|                                     | PTC                           | 1  | 93   | 89   | 0.257 | 0.052-1.275 | 0.096   | F | 0.0   | 1.0     | 0.0   | NA    |
|                                     | Endometrial cancer            | 1  | 63   | 61   | 0.181 | 0.020-1.594 | 0.123   | F | 0.0   | 1.0     | 0.0   | NA    |
|                                     | Cervical precancerous lesions | 1  | 179  | 135  | 0.672 | 0.411-1.099 | 0.113   | F | 0.0   | 1.0     | 0.0   | NA    |
|                                     | Gastric cancer                | 1  | 344  | 256  | 0.582 | 0.402-0.845 | 0.004   | F | 0.0   | 1.0     | 0.0   | NA    |
|                                     | Prostate cancer               | 1  | 291  | 265  | 0.909 | 0.289-2.853 | 0.870   | F | 0.0   | 1.0     | 0.0   | NA    |
|                                     | Head/neck carcinoma           | 1  | 288  | 853  | 0.862 | 0.625-1.189 | 0.364   | F | 0.0   | 1.0     | 0.0   | NA    |
|                                     | NHL                           | 1  | 151  | 433  | 0.956 | 0.099-9.257 | 0.969   | F | 0.0   | 1.0     | 0.0   | NA    |
|                                     | HCC                           | 1  | 65   | 113  | 0.926 | 0.490-1.748 | 0.812   | F | 0.0   | 1.0     | 0.0   | NA    |
|                                     | Larynx cancer                 | 1  | 23   | 67   | 0.300 | 0.016-5.793 | 0.426   | F | 0.0   | 1.0     | 0.0   | NA    |
|                                     | Esophageal cancer             | 1  | 184  | 196  | 1.212 | 0.774-1.899 | 0.401   | F | 0.0   | 1.0     | 0.0   | NA    |
|                                     | Lung cancer                   | 1  | 55   | 60   | 1.671 | 0.780-3.578 | 0.187   | F | 0.0   | 1.0     | 0.0   | NA    |
|                                     | Renal cell carcinoma          | 1  | 239  | 234  | 0.979 | 0.061-15.74 | 0.988   | F | 0.0   | 1.0     | 0.0   | NA    |
|                                     | Genotyping method             |    |      |      |       |             |         |   |       |         |       |       |
|                                     | TaqMan PCR                    | 3  | 459  | 546  | 0.847 | 0.601-1.194 | 0.343   | F | 2.500 | 0.287   | 19.99 | 0.224 |

|                                      |                                      |    |      |      |              |                    |                   |   |       |         |       |       |
|--------------------------------------|--------------------------------------|----|------|------|--------------|--------------------|-------------------|---|-------|---------|-------|-------|
| Heterozygote model<br>(AG versus AA) | <i>RFLP-PCR</i>                      | 3  | 359  | 421  | 1.042        | 0.748-1.451        | 0.808             | F | 3.499 | 0.174   | 42.84 | 0.042 |
|                                      | <i>Mass spectrometry</i>             | 3  | 418  | 391  | 1.056        | 0.641-1.742        | 0.830             | R | 4.951 | 0.084   | 59.61 | 0.686 |
|                                      | <i>HRMA</i>                          | 2  | 635  | 521  | <b>0.608</b> | <b>0.427-0.866</b> | <b>0.006</b>      | F | 0.524 | 0.469   | 0.0   | NA    |
|                                      | <i>SNPlex technology</i>             | 2  | 840  | 845  | 1.351        | 0.466-3.920        | 0.580             | F | 0.061 | 0.806   | 0.0   | NA    |
|                                      | <i>Other methods</i>                 | 3  | 814  | 1989 | 0.868        | 0.709-1.063        | 0.170             | F | 0.010 | 0.995   | 0.0   | 0.470 |
|                                      | Source of controls                   |    |      |      |              |                    |                   |   |       |         |       |       |
|                                      | <i>Population-based</i>              | 8  | 1362 | 1952 | 0.873        | 0.708-1.078        | 0.207             | F | 5.934 | 0.547   | 0.0   | 0.316 |
|                                      | <i>Hospital-based</i>                | 8  | 2163 | 2761 | 0.907        | 0.705-1.167        | 0.447             | R | 12.37 | 0.089   | 43.42 | 0.858 |
|                                      | HWE in controls                      |    |      |      |              |                    |                   |   |       |         |       |       |
|                                      | <i>Equilibrium</i>                   | 13 | 3260 | 4450 | 0.903        | 0.791-1.030        | 0.129             | F | 14.47 | 0.272   | 17.07 | 0.730 |
|                                      | <i>Disequilibrium</i>                | 3  | 265  | 263  | 0.618        | 0.385-0.993        | 0.047             | F | 1.564 | 0.457   | 0.0   | 0.263 |
|                                      | Quality score                        |    |      |      |              |                    |                   |   |       |         |       |       |
|                                      | <i>High quality</i>                  | 11 | 2909 | 4064 | <b>0.842</b> | <b>0.735-0.965</b> | <b>0.013</b>      | F | 10.69 | 0.382   | 6.464 | 0.811 |
|                                      | <i>Low quality</i>                   | 4  | 432  | 453  | 1.118        | 0.616-2.029        | 0.714             | F | 4.645 | 0.200   | 35.42 | 0.069 |
|                                      | Overall                              | 16 | 5201 | 6891 | 0.997        | 0.866-1.147        | 0.964             | R | 52.15 | < 0.001 | 71.23 | 0.754 |
|                                      | Geographical region                  |    |      |      |              |                    |                   |   |       |         |       |       |
|                                      | <i>Asian</i>                         | 10 | 3477 | 4817 | 0.972        | 0.797-1.186        | 0.780             | R | 37.83 | < 0.001 | 76.21 | 0.951 |
|                                      | <i>European</i>                      | 2  | 470  | 478  | 1.648        | 0.672-4.044        | 0.275             | R | 6.924 | 0.009   | 85.56 | NA    |
|                                      | <i>American</i>                      | 3  | 1175 | 1522 | 1.010        | 0.817-1.248        | 0.929             | F | 1.692 | 0.429   | 0.0   | 0.001 |
|                                      | <i>Turkish</i>                       | 1  | 79   | 74   | 0.853        | 0.401-1.815        | 0.680             | F | 0.0   | 1.0     | 0.0   | NA    |
|                                      | Cancer type                          |    |      |      |              |                    |                   |   |       |         |       |       |
|                                      | <i>Colorectal cancer</i>             | 2  | 901  | 1458 | 1.034        | 0.655-1.633        | 0.885             | R | 6.042 | 0.014   | 83.45 | NA    |
|                                      | <i>Bladder cancer</i>                | 2  | 1332 | 1359 | 1.114        | 0.937-1.325        | 0.221             | F | 0.035 | 0.851   | 0.0   | NA    |
|                                      | <i>PTC</i>                           | 1  | 118  | 123  | 0.593        | 0.336-1.049        | 0.073             | F | 0.0   | 1.0     | 0.0   | NA    |
|                                      | <i>Endometrial cancer</i>            | 1  | 79   | 74   | 0.853        | 0.401-1.815        | 0.680             | F | 0.0   | 1.0     | 0.0   | NA    |
|                                      | <i>Cervical precancerous lesions</i> | 1  | 251  | 251  | <b>0.488</b> | <b>0.341-0.698</b> | <b>&lt; 0.001</b> | F | 0.0   | 1.0     | 0.0   | NA    |
|                                      | <i>Gastric cancer</i>                | 1  | 557  | 423  | <b>0.749</b> | <b>0.580-0.966</b> | <b>0.026</b>      | F | 0.0   | 1.0     | 0.0   | NA    |
|                                      | <i>Prostate cancer</i>               | 1  | 347  | 312  | 1.063        | 0.710-1.591        | 0.766             | F | 0.0   | 1.0     | 0.0   | NA    |
|                                      | <i>Head/neck carcinoma</i>           | 1  | 513  | 1345 | 1.177        | 0.959-1.444        | 0.118             | F | 0.0   | 1.0     | 0.0   | NA    |
|                                      | <i>NHL</i>                           | 1  | 179  | 526  | 0.866        | 0.549-1.365        | 0.535             | F | 0.0   | 1.0     | 0.0   | NA    |
|                                      | <i>HCC</i>                           | 1  | 124  | 167  | 1.444        | 0.892-2.338        | 0.135             | F | 0.0   | 1.0     | 0.0   | NA    |
|                                      | <i>Larynx cancer</i>                 | 1  | 123  | 166  | <b>2.659</b> | <b>1.533-4.614</b> | <b>0.001</b>      | F | 0.0   | 1.0     | 0.0   | NA    |
|                                      | <i>Esophageal cancer</i>             | 1  | 325  | 329  | 1.197        | 0.877-1.634        | 0.256             | F | 0.0   | 1.0     | 0.0   | NA    |
|                                      | <i>Lung cancer</i>                   | 1  | 76   | 81   | 1.488        | 0.791-2.798        | 0.218             | F | 0.0   | 1.0     | 0.0   | NA    |
|                                      | <i>Renal cell carcinoma</i>          | 1  | 276  | 277  | 0.845        | 0.528-1.353        | 0.484             | F | 0.0   | 1.0     | 0.0   | NA    |
|                                      | Genotyping method                    |    |      |      |              |                    |                   |   |       |         |       |       |
|                                      | <i>TaqMan PCR</i>                    | 3  | 814  | 880  | 1.368        | 0.740-2.530        | 0.317             | R | 9.383 | 0.009   | 78.68 | 0.736 |
|                                      | <i>RFLP-PCR</i>                      | 3  | 574  | 616  | 1.085        | 0.674-1.747        | 0.736             | R | 6.801 | 0.033   | 70.59 | 0.535 |
|                                      | <i>Mass spectrometry</i>             | 3  | 652  | 661  | 0.932        | 0.469-1.849        | 0.840             | R | 16.84 | < 0.001 | 88.12 | 0.857 |
|                                      | <i>HRMA</i>                          | 2  | 904  | 735  | 0.827        | 0.667-1.026        | 0.084             | F | 2.077 | 0.150   | 51.86 | NA    |
|                                      | <i>SNPlex technology</i>             | 2  | 996  | 996  | 1.053        | 0.829-1.338        | 0.670             | F | 1.134 | 0.287   | 11.80 | NA    |
|                                      | <i>Other methods</i>                 | 3  | 1261 | 3003 | 0.963        | 0.743-1.248        | 0.776             | R | 5.851 | 0.054   | 65.82 | 0.854 |
|                                      | Source of controls                   |    |      |      |              |                    |                   |   |       |         |       |       |
|                                      | <i>Population-based</i>              | 8  | 2077 | 2970 | 1.036        | 0.759-1.413        | 0.824             | R | 36.76 | < 0.001 | 80.96 | 0.874 |
|                                      | <i>Hospital-based</i>                | 8  | 3124 | 3921 | 0.996        | 0.845-1.173        | 0.958             | R | 14.64 | 0.041   | 52.17 | 0.552 |
|                                      | HWE in controls                      |    |      |      |              |                    |                   |   |       |         |       |       |
|                                      | <i>Equilibrium</i>                   | 13 | 4748 | 6400 | 1.029        | 0.906-1.169        | 0.661             | R | 24.16 | 0.019   | 50.33 | 0.870 |
|                                      | <i>Disequilibrium</i>                | 3  | 453  | 491  | 1.026        | 0.339-3.106        | 0.964             | R | 25.59 | < 0.001 | 92.18 | 0.593 |
|                                      | Quality score                        |    |      |      |              |                    |                   |   |       |         |       |       |
|                                      | <i>High quality</i>                  | 11 | 4251 | 5929 | 0.931        | 0.780-1.110        | 0.426             | R | 36.09 | < 0.001 | 72.29 | 0.496 |
|                                      | <i>Low quality</i>                   | 4  | 625  | 633  | 1.396        | 0.861-2.263        | 0.176             | R | 8.661 | 0.034   | 65.36 | 0.889 |

OR: odds ratio, CI: confidence interval, F: fixed model, R: random model, NA: not appreciable

Supplementary Table S17. Meta-analysis of the association between **TARBP2 (G > A; rs784567)** variant and cancer risk.

| Comparison                                  | Subgroups            | No. of studies | Sample size |         | Test of association |             |         |       | Test of heterogeneity |         |                    | Publication bias  |
|---------------------------------------------|----------------------|----------------|-------------|---------|---------------------|-------------|---------|-------|-----------------------|---------|--------------------|-------------------|
|                                             |                      |                | Cancer      | Control | OR                  | 95% CI      | P-value | Model | Q test                | P-value | I <sup>2</sup> (%) | P-value (Egger's) |
| Allelic model<br>(A allele versus G allele) | Overall              | 5              | 3186        | 3664    | 0.884               | 0.783-0.998 | 0.046   | R     | 30.08                 | < 0.001 | 86.70              | 0.301             |
|                                             | Geographical region  |                |             |         |                     |             |         |       |                       |         |                    |                   |
|                                             | European             | 3              | 1160        | 1652    | 0.708               | 0.372-1.346 | 0.292   | R     | 29.67                 | < 0.001 | 93.26              | 0.205             |
|                                             | American             | 2              | 2026        | 2012    | 0.891               | 0.788-1.009 | 0.068   | F     | 0.007                 | 0.935   | 0.0                | NA                |
|                                             | Cancer type          |                |             |         |                     |             |         |       |                       |         |                    |                   |
|                                             | Prostate cancer      | 1              | 710         | 636     | 1.213               | 0.978-1.504 | 0.078   | F     | 0.0                   | 1.0     | 0.0                | NA                |
|                                             | Larynx Cancer        | 1              | 256         | 340     | 0.414               | 0.296-0.580 | < 0.001 | F     | 0.0                   | 1.0     | 0.0                | NA                |
|                                             | CLL                  | 1              | 194         | 676     | 0.684               | 0.495-0.947 | 0.022   | F     | 0.0                   | 1.0     | 0.0                | NA                |
|                                             | Bladder cancer       | 1              | 1474        | 1458    | 0.894               | 0.774-1.034 | 0.130   | F     | 0.0                   | 1.0     | 0.0                | NA                |
|                                             | Renal cell carcinoma | 1              | 552         | 554     | 0.884               | 0.698-1.119 | 0.306   | F     | 0.0                   | 1.0     | 0.0                | NA                |
|                                             | Genotyping method    |                |             |         |                     |             |         |       |                       |         |                    |                   |
|                                             | TaqMan PCR           | 2              | 450         | 1016    | 0.534               | 0.326-0.873 | 0.012   | R     | 4.438                 | 0.035   | 77.47              | NA                |
|                                             | SNPlex technology    | 2              | 2026        | 2012    | 0.891               | 0.788-1.009 | 0.068   | F     | 0.007                 | 0.935   | 0.0                | NA                |
|                                             | Other methods        | 1              | 710         | 636     | 1.213               | 0.978-1.504 | 0.078   | F     | 0.0                   | 1.0     | 0.0                | NA                |
|                                             | Source of controls   |                |             |         |                     |             |         |       |                       |         |                    |                   |
|                                             | Population-based     | 4              | 1712        | 2206    | 0.753               | 0.492-1.154 | 0.193   | R     | 29.82                 | < 0.001 | 89.94              | 0.075             |
|                                             | Hospital-based       | 1              | 1474        | 1458    | 0.894               | 0.774-1.034 | 0.130   | F     | 0.0                   | 1.0     | 0.0                | NA                |
|                                             | HWE in controls      |                |             |         |                     |             |         |       |                       |         |                    |                   |
|                                             | Equilibrium          | 3              | 2220        | 2688    | 0.862               | 0.768-0.967 | 0.012   | F     | 2.234                 | 0.327   | 10.49              | 0.370             |
|                                             | Disequilibrium       | 2              | 966         | 976     | 0.715               | 0.249-2.049 | 0.532   | R     | 27.77                 | < 0.001 | 96.40              | NA                |
|                                             | Quality score        |                |             |         |                     |             |         |       |                       |         |                    |                   |
|                                             | High quality         | 3              | 2220        | 2688    | 0.862               | 0.768-0.967 | 0.012   | F     | 2.234                 | 0.327   | 10.49              | 0.370             |
|                                             | Low quality          | 2              | 966         | 976     | 0.715               | 0.249-2.049 | 0.532   | R     | 27.77                 | < 0.001 | 96.40              | NA                |
| Recessive model<br>(AA versus GG+GA)        | Overall              | 5              | 1593        | 1832    | 0.860               | 0.706-1.048 | 0.135   | R     | 13.29                 | 0.010   | 69.91              | 0.189             |
|                                             | Geographical region  |                |             |         |                     |             |         |       |                       |         |                    |                   |
|                                             | European             | 3              | 580         | 826     | 0.651               | 0.288-1.475 | 0.304   | R     | 12.57                 | 0.002   | 84.09              | 0.170             |
|                                             | American             | 2              | 1013        | 1006    | 0.875               | 0.714-1.073 | 0.200   | F     | 0.719                 | 0.397   | 0.0                | NA                |
|                                             | Cancer type          |                |             |         |                     |             |         |       |                       |         |                    |                   |
|                                             | Prostate cancer      | 1              | 355         | 318     | 1.175               | 0.819-1.688 | 0.381   | F     | 0.0                   | 1.0     | 0.0                | NA                |
|                                             | Larynx Cancer        | 1              | 128         | 170     | 0.223               | 0.096-0.521 | 0.001   | F     | 0.0                   | 1.0     | 0.0                | NA                |
|                                             | CLL                  | 1              | 97          | 338     | 0.826               | 0.471-1.449 | 0.504   | F     | 0.0                   | 1.0     | 0.0                | NA                |
|                                             | Bladder cancer       | 1              | 737         | 729     | 0.923               | 0.727-1.170 | 0.506   | F     | 0.0                   | 1.0     | 0.0                | NA                |
|                                             | Renal cell carcinoma | 1              | 276         | 277     | 0.755               | 0.508-1.123 | 0.166   | F     | 0.0                   | 1.0     | 0.0                | NA                |
|                                             | Genotyping method    |                |             |         |                     |             |         |       |                       |         |                    |                   |
|                                             | TaqMan PCR           | 2              | 225         | 508     | 0.447               | 0.124-1.607 | 0.217   | R     | 6.355                 | 0.012   | 84.26              | NA                |
|                                             | SNPlex technology    | 2              | 1013        | 1006    | 0.875               | 0.714-1.073 | 0.200   | F     | 0.719                 | 0.397   | 0.0                | NA                |
|                                             | Other methods        | 1              | 355         | 318     | 1.175               | 0.819-1.688 | 0.381   | F     | 0.0                   | 1.0     | 0.0                | NA                |
|                                             | Source of controls   |                |             |         |                     |             |         |       |                       |         |                    |                   |
|                                             | Population-based     | 4              | 856         | 1103    | 0.706               | 0.420-1.188 | 0.190   | R     | 12.99                 | 0.005   | 76.90              | 0.127             |
|                                             | Hospital-based       | 1              | 737         | 729     | 0.923               | 0.727-1.170 | 0.506   | F     | 0.0                   | 1.0     | 0.0                | NA                |
|                                             | HWE in controls      |                |             |         |                     |             |         |       |                       |         |                    |                   |
|                                             | Equilibrium          | 3              | 1110        | 1344    | 0.869               | 0.718-1.053 | 0.152   | F     | 0.755                 | 0.686   | 0.0                | 0.458             |
|                                             | Disequilibrium       | 2              | 483         | 488     | 0.536               | 0.106-2.726 | 0.453   | R     | 12.48                 | < 0.001 | 91.99              | NA                |
|                                             | Quality score        |                |             |         |                     |             |         |       |                       |         |                    |                   |
|                                             | High quality         | 3              | 1110        | 1344    | 0.869               | 0.718-1.053 | 0.152   | F     | 0.755                 | 0.686   | 0.0                | 0.458             |
|                                             | Low quality          | 2              | 483         | 488     | 0.536               | 0.106-2.726 | 0.453   | R     | 12.48                 | < 0.001 | 91.99              | NA                |
| Dominant model<br>(GA+AA versus GG)         | Overall              | 5              | 1593        | 1832    | 0.828               | 0.679-1.008 | 0.060   | R     | 35.55                 | < 0.001 | 88.75              | 0.257             |
|                                             | Geographical region  |                |             |         |                     |             |         |       |                       |         |                    |                   |
|                                             | European             | 3              | 580         | 826     | 0.530               | 0.179-1.570 | 0.252   | R     | 34.54                 | < 0.001 | 94.21              | 0.029             |
|                                             | American             | 2              | 1013        | 1006    | 0.840               | 0.687-1.027 | 0.090   | F     | 0.475                 | 0.491   | 0.0                | NA                |
|                                             | Cancer type          |                |             |         |                     |             |         |       |                       |         |                    |                   |
|                                             | Prostate cancer      | 1              | 355         | 318     | 1.367               | 0.986-1.895 | 0.060   | F     | 0.0                   | 1.0     | 0.0                | NA                |
|                                             | Larynx Cancer        | 1              | 128         | 170     | 0.213               | 0.119-0.379 | < 0.001 | F     | 0.0                   | 1.0     | 0.0                | NA                |
|                                             | CLL                  | 1              | 97          | 338     | 0.481               | 0.298-0.777 | 0.003   | F     | 0.0                   | 1.0     | 0.0                | NA                |
|                                             | Bladder cancer       | 1              | 737         | 729     | 0.804               | 0.635-1.019 | 0.071   | F     | 0.0                   | 1.0     | 0.0                | NA                |
|                                             | Renal cell carcinoma | 1              | 276         | 277     | 0.941               | 0.644-1.374 | 0.752   | F     | 0.0                   | 1.0     | 0.0                | NA                |
|                                             | Genotyping method    |                |             |         |                     |             |         |       |                       |         |                    |                   |
|                                             | TaqMan PCR           | 2              | 225         | 508     | 0.325               | 0.146-0.724 | 0.006   | R     | 4.548                 | 0.033   | 78.01              | NA                |
|                                             | SNPlex technology    | 2              | 1013        | 1006    | 0.840               | 0.687-1.027 | 0.090   | F     | 0.475                 | 0.491   | 0.0                | NA                |
|                                             | Other methods        | 1              | 355         | 318     | 1.367               | 0.986-1.895 | 0.060   | F     | 0.0                   | 1.0     | 0.0                | NA                |
|                                             | Source of controls   |                |             |         |                     |             |         |       |                       |         |                    |                   |
|                                             | Population-based     | 4              | 856         | 1103    | 0.620               | 0.298-1.289 | 0.200   | R     | 35.55                 | < 0.001 | 91.56              | 0.001             |
|                                             | Hospital-based       | 1              | 737         | 729     | 0.804               | 0.635-1.019 | 0.071   | F     | 0.0                   | 1.0     | 0.0                | NA                |
|                                             | HWE in controls      |                |             |         |                     |             |         |       |                       |         |                    |                   |

|                                              |                             |   |      |      |              |                    |                   |   |       |         |       |       |
|----------------------------------------------|-----------------------------|---|------|------|--------------|--------------------|-------------------|---|-------|---------|-------|-------|
|                                              | <i>Equilibrium</i>          | 3 | 1110 | 1344 | 0.743        | 0.539-1.024        | 0.070             | R | 4.898 | 0.086   | 59.16 | 0.638 |
|                                              | <i>Disequilibrium</i>       | 2 | 483  | 488  | 0.548        | 0.089-3.392        | 0.518             | R | 30.18 | < 0.001 | 96.69 | NA    |
|                                              | <i>Quality score</i>        |   |      |      |              |                    |                   |   |       |         |       |       |
|                                              | <i>High quality</i>         | 3 | 1110 | 1344 | 0.743        | 0.539-1.024        | 0.070             | R | 4.898 | 0.086   | 59.16 | 0.638 |
|                                              | <i>Low quality</i>          | 2 | 483  | 488  | 0.548        | 0.089-3.392        | 0.518             | R | 30.18 | < 0.001 | 96.69 | NA    |
| <b>Homozygote model<br/>(AA versus GG)</b>   | <b>Overall</b>              | 5 | 808  | 887  | <b>0.776</b> | <b>0.608-0.992</b> | <b>0.043</b>      | R | 30.40 | < 0.001 | 86.84 | 0.184 |
|                                              | <b>Geographical region</b>  |   |      |      |              |                    |                   |   |       |         |       |       |
|                                              | <i>European</i>             | 3 | 301  | 392  | 0.415        | 0.099-1.739        | 0.229             | R | 30.37 | < 0.001 | 93.42 | 0.041 |
|                                              | <i>American</i>             | 2 | 507  | 495  | 0.791        | 0.617-1.014        | 0.065             | F | 0.017 | 0.897   | 0.0   | NA    |
|                                              | <b>Cancer type</b>          |   |      |      |              |                    |                   |   |       |         |       |       |
|                                              | <i>Prostate cancer</i>      | 1 | 186  | 179  | 1.404        | 0.925-2.131        | 0.111             | F | 0.0   | 1.0     | 0.0   | NA    |
|                                              | <i>Larynx Cancer</i>        | 1 | 58   | 56   | <b>0.082</b> | <b>0.032-0.215</b> | <b>&lt; 0.001</b> | F | 0.0   | 1.0     | 0.0   | NA    |
|                                              | <i>CLL</i>                  | 1 | 57   | 157  | <b>0.519</b> | <b>0.276-0.979</b> | <b>0.043</b>      | F | 0.0   | 1.0     | 0.0   | NA    |
|                                              | <i>Bladder cancer</i>       | 1 | 376  | 353  | 0.799        | 0.597-1.069        | 0.131             | F | 0.0   | 1.0     | 0.0   | NA    |
|                                              | <i>Renal cell carcinoma</i> | 1 | 131  | 142  | 0.770        | 0.478-1.241        | 0.283             | F | 0.0   | 1.0     | 0.0   | NA    |
|                                              | <b>Genotyping method</b>    |   |      |      |              |                    |                   |   |       |         |       |       |
|                                              | <i>TaqMan PCR</i>           | 2 | 115  | 213  | 0.215        | 0.035-1.302        | 0.094             | R | 9.887 | 0.002   | 89.89 | NA    |
|                                              | <i>SNPlex technology</i>    | 2 | 507  | 495  | 0.791        | 0.617-1.014        | 0.065             | F | 0.017 | 0.897   | 0.0   | NA    |
|                                              | <i>Other methods</i>        | 1 | 186  | 179  | 1.404        | 0.925-2.131        | 0.111             | F | 0.0   | 1.0     | 0.0   | NA    |
|                                              | <b>Source of controls</b>   |   |      |      |              |                    |                   |   |       |         |       |       |
|                                              | <i>Population-based</i>     | 4 | 432  | 534  | 0.505        | 0.203-1.258        | 0.142             | R | 30.37 | < 0.001 | 90.12 | 0.021 |
|                                              | <i>Hospital-based</i>       | 1 | 376  | 353  | 0.799        | 0.597-1.069        | 0.131             | F | 0.0   | 1.0     | 0.0   | NA    |
|                                              | <b>HWE in controls</b>      |   |      |      |              |                    |                   |   |       |         |       |       |
|                                              | <i>Equilibrium</i>          | 3 | 564  | 652  | <b>0.748</b> | <b>0.594-0.943</b> | <b>0.014</b>      | F | 1.486 | 0.476   | 0.0   | 0.352 |
|                                              | <i>Disequilibrium</i>       | 2 | 244  | 235  | 0.352        | 0.022-5.661        | 0.461             | R | 28.32 | < 0.001 | 96.47 | NA    |
|                                              | <i>Quality score</i>        |   |      |      |              |                    |                   |   |       |         |       |       |
|                                              | <i>High quality</i>         | 3 | 564  | 652  | <b>0.748</b> | <b>0.594-0.943</b> | <b>0.014</b>      | F | 1.486 | 0.476   | 0.0   | 0.352 |
|                                              | <i>Low quality</i>          | 2 | 244  | 235  | 0.352        | 0.022-5.661        | 0.461             | R | 28.32 | < 0.001 | 96.47 | NA    |
| <b>Heterozygote model<br/>(GA versus GG)</b> | <b>Overall</b>              | 5 | 1248 | 1396 | 0.849        | 0.686-1.050        | 0.130             | R | 28.94 | < 0.001 | 86.18 | 0.304 |
|                                              | <b>Geographical region</b>  |   |      |      |              |                    |                   |   |       |         |       |       |
|                                              | <i>European</i>             | 3 | 468  | 646  | 0.553        | 0.200-1.530        | 0.254             | R | 27.12 | < 0.001 | 92.62 | 0.035 |
|                                              | <i>American</i>             | 2 | 780  | 750  | 0.864        | 0.698-1.069        | 0.178             | F | 1.031 | 0.310   | 3.010 | NA    |
|                                              | <b>Cancer type</b>          |   |      |      |              |                    |                   |   |       |         |       |       |
|                                              | <i>Prostate cancer</i>      | 1 | 269  | 250  | 1.350        | 0.950-1.918        | 0.094             | F | 0.0   | 1.0     | 0.0   | NA    |
|                                              | <i>Larynx Cancer</i>        | 1 | 121  | 135  | <b>0.253</b> | <b>0.140-0.456</b> | <b>&lt; 0.001</b> | F | 0.0   | 1.0     | 0.0   | NA    |
|                                              | <i>CLL</i>                  | 1 | 78   | 261  | <b>0.465</b> | <b>0.278-0.780</b> | <b>0.004</b>      | F | 0.0   | 1.0     | 0.0   | NA    |
|                                              | <i>Bladder cancer</i>       | 1 | 561  | 544  | 0.806        | 0.628-1.036        | 0.093             | F | 0.0   | 1.0     | 0.0   | NA    |
|                                              | <i>Renal cell carcinoma</i> | 1 | 219  | 206  | 1.031        | 0.690-1.539        | 0.883             | F | 0.0   | 1.0     | 0.0   | NA    |
|                                              | <b>Genotyping method</b>    |   |      |      |              |                    |                   |   |       |         |       |       |
|                                              | <i>TaqMan PCR</i>           | 2 | 199  | 396  | 0.357        | 0.242-0.526        | < 0.001           | F | 2.330 | 0.127   | 57.08 | NA    |
|                                              | <i>SNPlex technology</i>    | 2 | 780  | 750  | 0.864        | 0.698-1.069        | 0.178             | F | 1.031 | 0.310   | 3.010 | NA    |
|                                              | <i>Other methods</i>        | 1 | 269  | 250  | 1.350        | 0.950-1.918        | 0.094             | F | 0.0   | 1.0     | 0.0   | NA    |
|                                              | <b>Source of controls</b>   |   |      |      |              |                    |                   |   |       |         |       |       |
|                                              | <i>Population-based</i>     | 4 | 687  | 852  | 0.655        | 0.325-1.319        | 0.236             | R | 28.94 | < 0.001 | 89.63 | 0.002 |
|                                              | <i>Hospital-based</i>       | 1 | 561  | 544  | 0.806        | 0.628-1.036        | 0.093             | F | 0.0   | 1.0     | 0.0   | NA    |
|                                              | <b>HWE in controls</b>      |   |      |      |              |                    |                   |   |       |         |       |       |
|                                              | <i>Equilibrium</i>          | 3 | 858  | 1011 | 0.757        | 0.522-1.098        | 0.142             | R | 5.755 | 0.056   | 65.25 | 0.706 |
|                                              | <i>Disequilibrium</i>       | 2 | 390  | 385  | 0.594        | 0.115-3.067        | 0.534             | R | 22.91 | < 0.001 | 95.64 | NA    |
|                                              | <i>Quality score</i>        |   |      |      |              |                    |                   |   |       |         |       |       |
|                                              | <i>High quality</i>         | 3 | 858  | 1011 | 0.757        | 0.522-1.098        | 0.142             | R | 5.755 | 0.056   | 65.25 | 0.706 |
|                                              | <i>Low quality</i>          | 2 | 390  | 385  | 0.594        | 0.115-3.067        | 0.534             | R | 22.91 | < 0.001 | 95.64 | NA    |

OR: odds ratio, CI: confidence interval, F: fixed model, R: random model, NA: not appreciable.

Supplementary Table S18. Meta-analysis of the association between **AGO1 (A > G; rs595961)** variant and cancer risk.

| Comparison                                  | Subgroups            | No. of studies | Sample size |         | Test of association |             |         |       | Test of heterogeneity |         |                    | Publication bias  |
|---------------------------------------------|----------------------|----------------|-------------|---------|---------------------|-------------|---------|-------|-----------------------|---------|--------------------|-------------------|
|                                             |                      |                | Cancer      | Control | OR                  | 95% CI      | P-value | Model | Q test                | P-value | I <sup>2</sup> (%) | P-value (Egger's) |
| Allelic model<br>(G allele versus A allele) | Overall              | 5              | 3382        | 3706    | 1.008               | 0.885-1.149 | 0.903   | R     | 15.62                 | 0.004   | 74.40              | 0.642             |
|                                             | Geographical region  |                |             |         |                     |             |         |       |                       |         |                    |                   |
|                                             | Asian                | 2              | 1142        | 984     | 1.445               | 1.151-1.815 | 0.002   | F     | 0.035                 | 0.852   | 0.0                | NA                |
|                                             | European             | 1              | 206         | 678     | 1.055               | 0.692-1.608 | 0.804   | F     | 0.0                   | 1.0     | 0.0                | NA                |
|                                             | American             | 2              | 2034        | 2044    | 0.816               | 0.687-0.968 | 0.020   | F     | 0.095                 | 0.757   | 0.0                | NA                |
|                                             | Cancer type          |                |             |         |                     |             |         |       |                       |         |                    |                   |
|                                             | Lung cancer          | 2              | 1142        | 984     | 1.445               | 1.151-1.815 | 0.002   | F     | 0.035                 | 0.852   | 0.0                | NA                |
|                                             | Bladder cancer       | 1              | 1480        | 1482    | 0.830               | 0.677-1.017 | 0.072   | F     | 0.0                   | 1.0     | 0.0                | NA                |
|                                             | CLL                  | 1              | 206         | 678     | 1.055               | 0.692-1.608 | 0.804   | F     | 0.0                   | 1.0     | 0.0                | NA                |
|                                             | Renal cell carcinoma | 1              | 554         | 562     | 0.782               | 0.568-1.076 | 0.130   | F     | 0.0                   | 1.0     | 0.0                | NA                |
|                                             | Genotyping method    |                |             |         |                     |             |         |       |                       |         |                    |                   |
|                                             | TaqMan PCR           | 2              | 1152        | 1468    | 1.340               | 1.080-1.664 | 0.008   | F     | 1.680                 | 0.195   | 40.47              | NA                |
|                                             | SNPlex technology    | 2              | 2034        | 2044    | 0.816               | 0.687-0.968 | 0.020   | F     | 0.095                 | 0.757   | 0.0                | NA                |
|                                             | Other methods        | 1              | 196         | 194     | 1.380               | 0.806-2.360 | 0.240   | F     | 0.0                   | 1.0     | 0.0                | NA                |
|                                             | Source of controls   |                |             |         |                     |             |         |       |                       |         |                    |                   |
|                                             | Population-based     | 2              | 760         | 1240    | 0.872               | 0.676-1.125 | 0.291   | F     | 1.234                 | 0.267   | 18.94              | NA                |
|                                             | Hospital-based       | 3              | 2622        | 2466    | 1.160               | 0.753-1.786 | 0.500   | R     | 12.69                 | 0.002   | 84.25              | 0.655             |
|                                             | HWE in controls      |                |             |         |                     |             |         |       |                       |         |                    |                   |
|                                             | Equilibrium          | 5              | 3382        | 3706    | 1.045               | 0.790-1.383 | 0.757   | R     | 15.62                 | 0.004   | 74.40              | 0.642             |
|                                             | Quality score        |                |             |         |                     |             |         |       |                       |         |                    |                   |
|                                             | High quality         | 4              | 3186        | 3512    | 0.999               | 0.733-1.363 | 0.997   | R     | 14.23                 | 0.003   | 78.92              | 0.889             |
|                                             | Low quality          | 1              | 196         | 194     | 1.380               | 0.806-2.360 | 0.240   | F     | 0.0                   | 1.0     | 0.0                | NA                |
| Recessive model<br>(GG versus AA+AG)        | Overall              | 5              | 1691        | 1853    | 0.946               | 0.601-1.490 | 0.811   | F     | 4.620                 | 0.329   | 13.42              | 0.114             |
|                                             | Geographical region  |                |             |         |                     |             |         |       |                       |         |                    |                   |
|                                             | Asian                | 2              | 571         | 492     | 1.607               | 0.685-3.770 | 0.276   | F     | 1.498                 | 0.221   | 33.25              | NA                |
|                                             | European             | 1              | 103         | 339     | 1.329               | 0.408-4.331 | 0.637   | F     | 0.0                   | 1.0     | 0.0                | NA                |
|                                             | American             | 2              | 1017        | 1022    | 0.664               | 0.364-1.214 | 0.184   | F     | 0.0                   | 0.987   | 0.0                | NA                |
|                                             | Cancer type          |                |             |         |                     |             |         |       |                       |         |                    |                   |
|                                             | Lung cancer          | 2              | 571         | 492     | 1.607               | 0.685-3.770 | 0.276   | F     | 1.498                 | 0.221   | 33.25              | NA                |
|                                             | Bladder cancer       | 1              | 740         | 741     | 0.662               | 0.317-1.384 | 0.273   | F     | 0.0                   | 1.0     | 0.0                | NA                |
|                                             | CLL                  | 1              | 103         | 339     | 1.329               | 0.408-4.331 | 0.637   | F     | 0.0                   | 1.0     | 0.0                | NA                |
|                                             | Renal cell carcinoma | 1              | 277         | 281     | 0.669               | 0.235-1.906 | 0.452   | F     | 0.0                   | 1.0     | 0.0                | NA                |
|                                             | Genotyping method    |                |             |         |                     |             |         |       |                       |         |                    |                   |
|                                             | TaqMan PCR           | 2              | 576         | 734     | 1.353               | 0.664-2.756 | 0.405   | F     | 0.001                 | 0.970   | 0.0                | NA                |
|                                             | SNPlex technology    | 2              | 1017        | 1022    | 0.664               | 0.364-1.214 | 0.184   | F     | 0.0                   | 0.987   | 0.0                | NA                |
|                                             | Other methods        | 1              | 98          | 97      | 9.286               | 0.493-174.8 | 0.137   | F     | 0.0                   | 1.0     | 0.0                | NA                |
|                                             | Source of controls   |                |             |         |                     |             |         |       |                       |         |                    |                   |
|                                             | Population-based     | 2              | 380         | 620     | 0.905               | 0.413-1.981 | 0.803   | F     | 0.727                 | 0.394   | 0.0                | NA                |
|                                             | Hospital-based       | 3              | 1311        | 1233    | 0.968               | 0.554-1.691 | 0.908   | F     | 3.874                 | 0.144   | 48.38              | 0.312             |
|                                             | HWE in controls      |                |             |         |                     |             |         |       |                       |         |                    |                   |
|                                             | Equilibrium          | 5              | 1691        | 1853    | 0.946               | 0.601-1.490 | 0.811   | F     | 4.620                 | 0.329   | 14.42              | 0.114             |
|                                             | Quality score        |                |             |         |                     |             |         |       |                       |         |                    |                   |
|                                             | High quality         | 4              | 1593        | 1756    | 0.895               | 0.565-1.417 | 0.635   | F     | 2.237                 | 0.525   | 0.0                | 0.532             |
|                                             | Low quality          | 1              | 98          | 97      | 9.286               | 0.493-174.8 | 0.137   | F     | 0.0                   | 1.0     | 0.0                | NA                |
| Dominant model<br>(AG+GG versus AA)         | Overall              | 5              | 1691        | 1853    | 1.012               | 0.873-1.173 | 0.874   | R     | 15.45                 | 0.004   | 74.10              | 0.767             |
|                                             | Geographical region  |                |             |         |                     |             |         |       |                       |         |                    |                   |
|                                             | Asian                | 2              | 571         | 492     | 1.523               | 1.174-1.975 | 0.002   | F     | 0.494                 | 0.482   | 0.0                | NA                |
|                                             | European             | 1              | 103         | 339     | 1.025               | 0.631-1.667 | 0.920   | F     | 0.0                   | 1.0     | 0.0                | NA                |
|                                             | American             | 2              | 1017        | 1022    | 0.805               | 0.664-0.977 | 0.028   | F     | 0.120                 | 0.729   | 0.0                | NA                |
|                                             | Cancer type          |                |             |         |                     |             |         |       |                       |         |                    |                   |
|                                             | Lung cancer          | 2              | 571         | 492     | 1.523               | 1.174-1.975 | 0.002   | F     | 0.494                 | 0.482   | 0.0                | NA                |
|                                             | Bladder cancer       | 1              | 740         | 741     | 0.823               | 0.655-1.034 | 0.095   | F     | 0.0                   | 1.0     | 0.0                | NA                |
|                                             | CLL                  | 1              | 103         | 339     | 1.025               | 0.631-1.667 | 0.920   | F     | 0.0                   | 1.0     | 0.0                | NA                |
|                                             | Renal cell carcinoma | 1              | 277         | 281     | 0.763               | 0.530-1.097 | 0.145   | F     | 0.0                   | 1.0     | 0.0                | NA                |
|                                             | Genotyping method    |                |             |         |                     |             |         |       |                       |         |                    |                   |
|                                             | TaqMan PCR           | 2              | 576         | 734     | 1.420               | 1.108-1.819 | 0.006   | F     | 2.330                 | 0.127   | 57.07              | NA                |
|                                             | SNPlex technology    | 2              | 1017        | 1022    | 0.805               | 0.664-0.977 | 0.028   | F     | 0.120                 | 0.729   | 0.0                | NA                |
|                                             | Other methods        | 1              | 98          | 97      | 1.251               | 0.682-2.296 | 0.469   | F     | 0.0                   | 1.0     | 0.0                | NA                |
|                                             | Source of controls   |                |             |         |                     |             |         |       |                       |         |                    |                   |
|                                             | Population-based     | 2              | 380         | 620     | 0.848               | 0.634-1.135 | 0.268   | F     | 0.912                 | 0.340   | 0.0                | NA                |
|                                             | Hospital-based       | 3              | 1311        | 1233    | 1.164               | 0.714-1.896 | 0.543   | R     | 12.63                 | 0.002   | 84.16              | 0.731             |
|                                             | HWE in controls      |                |             |         |                     |             |         |       |                       |         |                    |                   |
|                                             | Equilibrium          | 5              | 1691        | 1853    | 1.039               | 0.757-1.426 | 0.812   | R     | 15.45                 | 0.004   | 74.10              | 0.767             |
|                                             | Quality score        |                |             |         |                     |             |         |       |                       |         |                    |                   |

|                                      |                             |   |      |      |              |                    |              |   |       |       |       |       |
|--------------------------------------|-----------------------------|---|------|------|--------------|--------------------|--------------|---|-------|-------|-------|-------|
|                                      | <i>High quality</i>         | 4 | 1593 | 1756 | 1.008        | 0.702-1.448        | 0.965        | R | 14.95 | 0.002 | 79.93 | 0.916 |
|                                      | <i>Low quality</i>          | 1 | 98   | 97   | 1.251        | 0.682-2.296        | 0.469        | F | 0.0   | 1.0   | 0.0   | NA    |
| Homozygote model<br>(GG versus AA)   | <b>Overall</b>              | 5 | 1223 | 1353 | 0.953        | 0.604-1.504        | 0.836        | F | 5.680 | 0.224 | 29.58 | 0.174 |
|                                      | <b>Geographical region</b>  |   |      |      |              |                    |              |   |       |       |       |       |
|                                      | <i>Asian</i>                | 2 | 375  | 362  | 1.841        | 0.782-4.338        | 0.163        | F | 1.315 | 0.252 | 23.94 | NA    |
|                                      | <i>European</i>             | 1 | 77   | 252  | 1.326        | 0.404-4.353        | 0.642        | F | 0.0   | 1.0   | 0.0   | NA    |
|                                      | <i>American</i>             | 2 | 771  | 739  | 0.630        | 0.344-1.154        | 0.134        | F | 0.0   | 0.983 | 0.0   | NA    |
|                                      | <b>Cancer type</b>          |   |      |      |              |                    |              |   |       |       |       |       |
|                                      | <i>Lung cancer</i>          | 2 | 375  | 362  | 1.841        | 0.782-4.338        | 0.163        | F | 1.315 | 0.252 | 23.94 | NA    |
|                                      | <i>Bladder cancer</i>       | 1 | 563  | 541  | 0.633        | 0.302-1.327        | 0.226        | F | 0.0   | 1.0   | 0.0   | NA    |
|                                      | <i>CLL</i>                  | 1 | 77   | 252  | 1.326        | 0.404-4.353        | 0.642        | F | 0.0   | 1.0   | 0.0   | NA    |
|                                      | <i>Renal cell carcinoma</i> | 1 | 208  | 198  | 0.624        | 0.218-1.786        | 0.379        | F | 0.0   | 1.0   | 0.0   | NA    |
|                                      | <b>Genotyping method</b>    |   |      |      |              |                    |              |   |       |       |       |       |
|                                      | <i>TaqMan PCR</i>           | 2 | 383  | 545  | 1.483        | 0.725-3.033        | 0.280        | F | 0.053 | 0.817 | 0.0   | NA    |
|                                      | <i>SNPlex technology</i>    | 2 | 771  | 739  | 0.630        | 0.344-1.154        | 0.134        | F | 0.0   | 0.983 | 0.0   | NA    |
|                                      | <i>Other methods</i>        | 1 | 69   | 69   | 9.550        | 0.504-180.8        | 0.133        | F | 0.0   | 1.0   | 0.0   | NA    |
|                                      | <b>Source of controls</b>   |   |      |      |              |                    |              |   |       |       |       |       |
|                                      | <i>Population-based</i>     | 2 | 285  | 450  | 0.869        | 0.395-1.910        | 0.726        | F | 0.867 | 0.352 | 0.0   | NA    |
|                                      | <i>Hospital-based</i>       | 3 | 938  | 903  | 1.229        | 0.442-3.415        | 0.692        | R | 4.733 | 0.094 | 57.74 | 0.384 |
|                                      | <b>HWE in controls</b>      |   |      |      |              |                    |              |   |       |       |       |       |
|                                      | <i>Equilibrium</i>          | 5 | 1223 | 1353 | 0.953        | 0.604-1.504        | 0.836        | F | 5.680 | 0.224 | 29.58 | 0.174 |
|                                      | <b>Quality score</b>        |   |      |      |              |                    |              |   |       |       |       |       |
|                                      | <i>High quality</i>         | 4 | 1154 | 1284 | 0.900        | 0.567-1.429        | 0.656        | F | 3.264 | 0.353 | 8.082 | 0.607 |
|                                      | <i>Low quality</i>          | 1 | 69   | 69   | 9.550        | 0.504-180.8        | 0.133        | F | 0.0   | 1.0   | 0.0   | NA    |
| Heterozygote model<br>(AG versus AA) | <b>Overall</b>              | 5 | 1652 | 1808 | 0.983        | 0.839-1.151        | 0.829        | R | 13.42 | 0.009 | 70.20 | 0.903 |
|                                      | <b>Geographical region</b>  |   |      |      |              |                    |              |   |       |       |       |       |
|                                      | <i>Asian</i>                | 2 | 554  | 484  | <b>1.487</b> | <b>1.139-1.942</b> | <b>0.004</b> | F | 1.118 | 0.290 | 10.56 | NA    |
|                                      | <i>European</i>             | 1 | 99   | 329  | 0.991        | 0.595-1.650        | 0.971        | F | 0.0   | 1.0   | 0.0   | NA    |
|                                      | <i>American</i>             | 2 | 999  | 995  | 0.822        | 0.674-1.003        | 0.054        | F | 0.116 | 0.734 | 0.0   | NA    |
|                                      | <b>Cancer type</b>          |   |      |      |              |                    |              |   |       |       |       |       |
|                                      | <i>Lung cancer</i>          | 2 | 554  | 484  | <b>1.487</b> | <b>1.139-1.942</b> | <b>0.004</b> | F | 1.118 | 0.290 | 10.56 | NA    |
|                                      | <i>Bladder cancer</i>       | 1 | 728  | 723  | 0.840        | 0.664-1.063        | 0.146        | F | 0.0   | 1.0   | 0.0   | NA    |
|                                      | <i>CLL</i>                  | 1 | 99   | 329  | 0.991        | 0.595-1.650        | 0.971        | F | 0.0   | 1.0   | 0.0   | NA    |
|                                      | <i>Renal cell carcinoma</i> | 1 | 271  | 272  | 0.778        | 0.534-1.133        | 0.190        | F | 0.0   | 1.0   | 0.0   | NA    |
|                                      | <b>Genotyping method</b>    |   |      |      |              |                    |              |   |       |       |       |       |
|                                      | <i>TaqMan PCR</i>           | 2 | 559  | 716  | <b>1.414</b> | <b>1.095-1.825</b> | <b>0.008</b> | F | 2.490 | 0.115 | 59.83 | NA    |
|                                      | <i>SNPlex technology</i>    | 2 | 999  | 995  | 0.822        | 0.674-1.003        | 0.054        | F | 0.116 | 0.734 | 0.0   | NA    |
|                                      | <i>Other methods</i>        | 1 | 94   | 97   | 1.099        | 0.591-2.044        | 0.764        | F | 0.0   | 1.0   | 0.0   | NA    |
|                                      | <b>Source of controls</b>   |   |      |      |              |                    |              |   |       |       |       |       |
|                                      | <i>Population-based</i>     | 2 | 370  | 601  | 0.847        | 0.626-1.146        | 0.282        | F | 0.560 | 0.454 | 0.0   | NA    |
|                                      | <i>Hospital-based</i>       | 3 | 1282 | 1207 | 1.135        | 0.710-1.813        | 0.597        | R | 11.04 | 0.004 | 81.88 | 0.810 |
|                                      | <b>HWE in controls</b>      |   |      |      |              |                    |              |   |       |       |       |       |
|                                      | <i>Equilibrium</i>          | 5 | 1652 | 1808 | 1.024        | 0.755-1.390        | 0.877        | R | 13.42 | 0.009 | 70.20 | 0.903 |
|                                      | <b>Quality score</b>        |   |      |      |              |                    |              |   |       |       |       |       |
|                                      | <i>High quality</i>         | 4 | 1558 | 1711 | 1.013        | 0.711-1.443        | 0.945        | R | 13.35 | 0.004 | 77.53 | 0.963 |
|                                      | <i>Low quality</i>          | 1 | 94   | 97   | 1.099        | 0.591-2.044        | 0.764        | F | 0.0   | 1.0   | 0.0   | NA    |

OR: odds ratio, CI: confidence interval, F: fixed model, R: random model, NA: not appreciable



Supplementary Table S19. Meta-analysis of the association between **AGO1 (G > A; rs636832)** variant and cancer risk.

| Comparison                                          | Subgroups                   | No. of studies | Sample size |         | Test of association |                    |              |       | Test of heterogeneity |         |                    | Publication bias  |  |
|-----------------------------------------------------|-----------------------------|----------------|-------------|---------|---------------------|--------------------|--------------|-------|-----------------------|---------|--------------------|-------------------|--|
|                                                     |                             |                | Cancer      | Control | OR                  | 95% CI             | P-value      | Model | Q test                | P-value | I <sup>2</sup> (%) | P-value (Egger's) |  |
| <b>Allelic model<br/>(A allele versus G allele)</b> | <b>Overall</b>              | 6              | 4316        | 4856    | 0.967               | 0.866-1.080        | 0.556        | F     | 8.727                 | 0.120   | 42.70              | <b>0.035</b>      |  |
|                                                     | <b>Geographical region</b>  |                |             |         |                     |                    |              |       |                       |         |                    |                   |  |
|                                                     | <i>Asian</i>                | 2              | 1452        | 1198    | 0.847               | 0.499-1.437        | 0.538        | R     | 4.331                 | 0.037   | 76.91              | NA                |  |
|                                                     | <i>European</i>             | 1              | 210         | 694     | 0.720               | 0.402-1.289        | 0.269        | F     | 0.0                   | 1.0     | 0.0                | NA                |  |
|                                                     | <i>American</i>             | 2              | 2030        | 2026    | 0.839               | 0.677-1.040        | 0.109        | F     | 0.037                 | 0.847   | 0.0                | NA                |  |
|                                                     | <i>Latin American</i>       | 1              | 624         | 938     | 1.103               | 0.901-1.351        | 0.342        | F     | 0.0                   | 1.0     | 0.0                | NA                |  |
|                                                     | <b>Cancer type</b>          |                |             |         |                     |                    |              |       |                       |         |                    |                   |  |
|                                                     | <i>Bladder cancer</i>       | 1              | 1476        | 1472    | 0.828               | 0.641-1.069        | 0.147        | F     | 0.0                   | 1.0     | 0.0                | NA                |  |
|                                                     | <i>CLL</i>                  | 1              | 210         | 694     | 0.720               | 0.402-1.289        | 0.269        | F     | 0.0                   | 1.0     | 0.0                | NA                |  |
|                                                     | <i>CML</i>                  | 1              | 624         | 938     | 1.103               | 0.901-1.351        | 0.342        | F     | 0.0                   | 1.0     | 0.0                | NA                |  |
|                                                     | <i>Gastric cancer</i>       | 1              | 1256        | 1004    | 1.063               | 0.882-1.280        | 0.522        | F     | 0.0                   | 1.0     | 0.0                | NA                |  |
|                                                     | <i>Lung cancer</i>          | 1              | 196         | 194     | <b>0.614</b>        | <b>0.380-0.994</b> | <b>0.047</b> | F     | 0.0                   | 1.0     | 0.0                | NA                |  |
|                                                     | <i>Renal cell carcinoma</i> | 1              | 554         | 554     | 0.867               | 0.583-1.289        | 0.480        | F     | 0.0                   | 1.0     | 0.0                | NA                |  |
|                                                     | <b>Genotyping method</b>    |                |             |         |                     |                    |              |       |                       |         |                    |                   |  |
|                                                     | <i>TaqMan PCR</i>           | 2              | 834         | 1632    | 1.054               | 0.870-1.276        | 0.593        | F     | 1.842                 | 0.175   | 45.70              | NA                |  |
|                                                     | <i>SNPlex technology</i>    | 2              | 2030        | 2026    | 0.839               | 0.677-1.040        | 0.109        | F     | 0.037                 | 0.847   | 0.0                | NA                |  |
|                                                     | <i>Other methods</i>        | 2              | 1452        | 1198    | 0.847               | 0.499-1.437        | 0.538        | R     | 4.331                 | 0.037   | 76.91              | NA                |  |
|                                                     | <b>Source of controls</b>   |                |             |         |                     |                    |              |       |                       |         |                    |                   |  |
|                                                     | <i>Population-based</i>     | 2              | 764         | 1248    | 0.818               | 0.589-1.134        | 0.228        | F     | 0.268                 | 0.605   | 0.0                | NA                |  |
|                                                     | <i>Hospital-based</i>       | 4              | 3552        | 3608    | 0.943               | 0.775-1.149        | 0.562        | R     | 7.314                 | 0.063   | 58.98              | <b>0.086</b>      |  |
|                                                     | <b>HWE in controls</b>      |                |             |         |                     |                    |              |       |                       |         |                    |                   |  |
|                                                     | <i>Equilibrium</i>          | 6              | 4316        | 4856    | 0.967               | 0.866-1.080        | 0.556        | F     | 8.727                 | 0.120   | 42.70              | <b>0.035</b>      |  |
|                                                     | <b>Quality score</b>        |                |             |         |                     |                    |              |       |                       |         |                    |                   |  |
|                                                     | <i>High quality</i>         | 5              | 4120        | 4662    | 0.992               | 0.886-1.111        | 0.890        | F     | 5.120                 | 0.275   | 21.88              | 0.125             |  |
|                                                     | <i>Low quality</i>          | 1              | 196         | 194     | <b>0.614</b>        | <b>0.380-0.994</b> | <b>0.047</b> | F     | 0.0                   | 1.0     | 0.0                |                   |  |
| <b>Recessive model<br/>(AA versus GG+GA)</b>        | <b>Overall</b>              | 6              | 2158        | 2428    | 1.048               | 0.813-1.352        | 0.717        | F     | 3.726                 | 0.589   | 0.0                | 0.167             |  |
|                                                     | <b>Geographical region</b>  |                |             |         |                     |                    |              |       |                       |         |                    |                   |  |
|                                                     | <i>Asian</i>                | 2              | 726         | 599     | 0.974               | 0.632-1.500        | 0.903        | F     | 0.526                 | 0.468   | 0.0                | NA                |  |
|                                                     | <i>European</i>             | 1              | 105         | 347     | 0.466               | 0.024-9.104        | 0.615        | F     | 0.0                   | 1.0     | 0.0                | NA                |  |
|                                                     | <i>American</i>             | 2              | 1015        | 1013    | 0.983               | 0.271-3.566        | 0.979        | F     | 2.680                 | 0.102   | 62.69              | NA                |  |
|                                                     | <i>Latin American</i>       | 1              | 312         | 469     | 1.108               | 0.800-1.536        | 0.536        | F     | 0.0                   | 1.0     | 0.0                | NA                |  |
|                                                     | <b>Cancer type</b>          |                |             |         |                     |                    |              |       |                       |         |                    |                   |  |
|                                                     | <i>Bladder cancer</i>       | 1              | 738         | 736     | 1.667               | 0.397-6.999        | 0.485        | F     | 0.0                   | 1.0     | 0.0                | NA                |  |
|                                                     | <i>CLL</i>                  | 1              | 105         | 347     | 0.466               | 0.024-9.104        | 0.615        | F     | 0.0                   | 1.0     | 0.0                | NA                |  |
|                                                     | <i>CML</i>                  | 1              | 312         | 469     | 1.108               | 0.800-1.536        | 0.536        | F     | 0.0                   | 1.0     | 0.0                | NA                |  |
|                                                     | <i>Gastric cancer</i>       | 1              | 628         | 502     | 1.023               | 0.651-1.609        | 0.921        | F     | 0.0                   | 1.0     | 0.0                | NA                |  |
|                                                     | <i>Lung cancer</i>          | 1              | 98          | 97      | 0.581               | 0.135-2.501        | 0.466        | F     | 0.0                   | 1.0     | 0.0                | NA                |  |
|                                                     | <i>Renal cell carcinoma</i> | 1              | 277         | 277     | 0.110               | 0.006-2.044        | 0.139        | F     | 0.0                   | 1.0     | 0.0                | NA                |  |
|                                                     | <b>Genotyping method</b>    |                |             |         |                     |                    |              |       |                       |         |                    |                   |  |
|                                                     | <i>TaqMan PCR</i>           | 2              | 417         | 816     | 1.097               | 0.793-1.517        | 0.575        | F     | 0.322                 | 0.570   | 0.0                | NA                |  |
|                                                     | <i>SNPlex technology</i>    | 2              | 1015        | 1013    | 0.983               | 0.271-3.566        | 0.979        | F     | 2.680                 | 0.102   | 62.69              | NA                |  |
|                                                     | <i>Other methods</i>        | 2              | 726         | 599     | 0.974               | 0.632-1.500        | 0.903        | F     | 0.526                 | 0.468   | 0.0                | NA                |  |
|                                                     | <b>Source of controls</b>   |                |             |         |                     |                    |              |       |                       |         |                    |                   |  |
|                                                     | <i>Population-based</i>     | 2              | 382         | 624     | 0.224               | 0.028-1.798        | 0.159        | F     | 0.464                 | 0.496   | 0.0                | NA                |  |
|                                                     | <i>Hospital-based</i>       | 4              | 1776        | 1804    | 1.073               | 0.830-1.386        | 0.590        | F     | 1.121                 | 0.772   | 0.0                | 0.790             |  |
|                                                     | <b>HWE in controls</b>      |                |             |         |                     |                    |              |       |                       |         |                    |                   |  |
|                                                     | <i>Equilibrium</i>          | 6              | 2158        | 2428    | 1.048               | 0.813-1.352        | 0.717        | F     | 3.726                 | 0.589   | 0.0                | 0.167             |  |
|                                                     | <b>Quality score</b>        |                |             |         |                     |                    |              |       |                       |         |                    |                   |  |
|                                                     | <i>High quality</i>         | 5              | 2060        | 2331    | 1.068               | 0.825-1.382        | 0.619        | F     | 3.079                 | 0.545   | 0.0                | 0.319             |  |
|                                                     | <i>Low quality</i>          | 1              | 98          | 97      | 0.581               | 0.135-2.501        | 0.466        | F     | 0.0                   | 1.0     | 0.0                | NA                |  |
| <b>Dominant model<br/>(GA+AA versus GG)</b>         | <b>Overall</b>              | 6              | 2158        | 2428    | 0.941               | 0.819-1.081        | 0.392        | F     | 8.968                 | 0.110   | 44.25              | 0.224             |  |
|                                                     | <b>Geographical region</b>  |                |             |         |                     |                    |              |       |                       |         |                    |                   |  |
|                                                     | <i>Asian</i>                | 2              | 726         | 599     | 0.810               | 0.408-1.607        | 0.546        | R     | 4.933                 | 0.026   | 79.73              | NA                |  |
|                                                     | <i>European</i>             | 1              | 105         | 347     | 0.737               | 0.400-1.357        | 0.327        | F     | 0.0                   | 1.0     | 0.0                | NA                |  |
|                                                     | <i>American</i>             | 2              | 1015        | 1013    | 0.830               | 0.660-1.044        | 0.111        | F     | 0.401                 | 0.527   | 0.0                | NA                |  |
|                                                     | <i>Latin American</i>       | 1              | 312         | 469     | 1.172               | 0.839-1.638        | 0.353        | F     | 0.0                   | 1.0     | 0.0                | NA                |  |
|                                                     | <b>Cancer type</b>          |                |             |         |                     |                    |              |       |                       |         |                    |                   |  |
|                                                     | <i>Bladder cancer</i>       | 1              | 738         | 736     | 0.792               | 0.603-1.039        | 0.093        | F     | 0.0                   | 1.0     | 0.0                | NA                |  |
|                                                     | <i>CLL</i>                  | 1              | 105         | 347     | 0.737               | 0.400-1.357        | 0.327        | F     | 0.0                   | 1.0     | 0.0                | NA                |  |
|                                                     | <i>CML</i>                  | 1              | 312         | 469     | 1.172               | 0.839-1.638        | 0.353        | F     | 0.0                   | 1.0     | 0.0                | NA                |  |
|                                                     | <i>Gastric cancer</i>       | 1              | 628         | 502     | 1.095               | 0.866-1.386        | 0.448        | F     | 0.0                   | 1.0     | 0.0                | NA                |  |
|                                                     | <i>Lung cancer</i>          | 1              | 98          | 97      | <b>0.540</b>        | <b>0.303-0.963</b> | <b>0.037</b> | F     | 0.0                   | 1.0     | 0.0                | NA                |  |
|                                                     | <i>Renal cell carcinoma</i> | 1              | 277         | 277     | 0.932               | 0.609-1.426        | 0.745        | F     | 0.0                   | 1.0     | 0.0                | NA                |  |
|                                                     | <b>Genotyping method</b>    |                |             |         |                     |                    |              |       |                       |         |                    |                   |  |
|                                                     | <i>TaqMan PCR</i>           | 2              | 417         | 816     | 1.053               | 0.785-1.412        | 0.731        | F     | 1.707                 | 0.191   | 41.41              | NA                |  |

|                                              |                             |   |      |      |              |                    |              |   |       |       |       |       |
|----------------------------------------------|-----------------------------|---|------|------|--------------|--------------------|--------------|---|-------|-------|-------|-------|
|                                              | <i>SNPlex technology</i>    | 2 | 1015 | 1013 | 0.830        | 0.660-1.044        | 0.111        | F | 0.401 | 0.527 | 0.0   | NA    |
|                                              | <i>Other methods</i>        | 2 | 726  | 599  | 0.810        | 0.408-1.607        | 0.546        | R | 4.933 | 0.026 | 79.73 | NA    |
|                                              | <i>Source of controls</i>   |   |      |      |              |                    |              |   |       |       |       |       |
|                                              | <i>Population-based</i>     | 2 | 382  | 624  | 0.863        | 0.609-1.223        | 0.408        | F | 0.383 | 0.536 | 0.0   | NA    |
|                                              | <i>Hospital-based</i>       | 4 | 1776 | 1804 | 0.916        | 0.699-1.201        | 0.527        | R | 8.305 | 0.040 | 63.88 | 0.402 |
|                                              | <i>HWE in controls</i>      |   |      |      |              |                    |              |   |       |       |       |       |
|                                              | <i>Equilibrium</i>          | 6 | 2158 | 2428 | 0.941        | 0.819-1.081        | 0.392        | F | 8.968 | 0.110 | 44.25 | 0.224 |
|                                              | <i>Quality score</i>        |   |      |      |              |                    |              |   |       |       |       |       |
|                                              | <i>High quality</i>         | 5 | 2060 | 2331 | 0.974        | 0.844-1.124        | 0.716        | F | 5.204 | 0.267 | 23.14 | 0.570 |
|                                              | <i>Low quality</i>          | 1 | 98   | 97   | <b>0.540</b> | <b>0.303-0.963</b> | <b>0.037</b> | F | 0.0   | 1.0   | 0.0   | NA    |
| <b>Homozygote model<br/>(AA versus GG)</b>   | <b>Overall</b>              | 6 | 1536 | 1712 | 1.090        | 0.816-1.456        | 0.561        | F | 4.571 | 0.470 | 0.0   | 0.111 |
|                                              | <i>Geographical region</i>  |   |      |      |              |                    |              |   |       |       |       |       |
|                                              | <i>Asian</i>                | 2 | 435  | 359  | 0.989        | 0.635-1.542        | 0.962        | F | 1.123 | 0.289 | 10.96 | NA    |
|                                              | <i>European</i>             | 1 | 90   | 286  | 0.448        | 0.023-8.746        | 0.596        | F | 0.0   | 1.0   | 0.0   | NA    |
|                                              | <i>American</i>             | 2 | 855  | 828  | 0.950        | 0.262-3.449        | 0.938        | F | 2.593 | 0.107 | 61.43 | NA    |
|                                              | <i>Latin American</i>       | 1 | 156  | 239  | 1.217        | 0.812-1.823        | 0.342        | F | 0.0   | 1.0   | 0.0   | NA    |
|                                              | <i>Cancer type</i>          |   |      |      |              |                    |              |   |       |       |       |       |
|                                              | <i>Bladder cancer</i>       | 1 | 629  | 601  | 1.597        | 0.380-6.713        | 0.523        | F | 0.0   | 1.0   | 0.0   | NA    |
|                                              | <i>CLL</i>                  | 1 | 90   | 286  | 0.448        | 0.023-8.746        | 0.596        | F | 0.0   | 1.0   | 0.0   | NA    |
|                                              | <i>CML</i>                  | 1 | 156  | 239  | 1.217        | 0.812-1.823        | 0.342        | F | 0.0   | 1.0   | 0.0   | NA    |
|                                              | <i>Gastric cancer</i>       | 1 | 367  | 304  | 1.067        | 0.670-1.699        | 0.785        | F | 0.0   | 1.0   | 0.0   | NA    |
|                                              | <i>Lung cancer</i>          | 1 | 68   | 55   | 0.462        | 0.105-2.024        | 0.305        | F | 0.0   | 1.0   | 0.0   | NA    |
|                                              | <i>Renal cell carcinoma</i> | 1 | 226  | 227  | 0.110        | 0.006-2.048        | 0.139        | F | 0.0   | 1.0   | 0.0   | NA    |
|                                              | <i>Genotyping method</i>    |   |      |      |              |                    |              |   |       |       |       |       |
|                                              | <i>TaqMan PCR</i>           | 2 | 246  | 525  | 1.195        | 0.800-1.783        | 0.384        | F | 0.427 | 0.514 | 0.0   | NA    |
|                                              | <i>SNPlex technology</i>    | 2 | 855  | 828  | 0.950        | 0.262-3.449        | 0.938        | F | 2.593 | 0.107 | 61.43 | NA    |
|                                              | <i>Other methods</i>        | 2 | 435  | 359  | 0.989        | 0.635-1.542        | 0.962        | F | 1.123 | 0.289 | 10.96 | NA    |
|                                              | <i>Source of controls</i>   |   |      |      |              |                    |              |   |       |       |       |       |
|                                              | <i>Population-based</i>     | 2 | 316  | 513  | 0.219        | 0.027-1.764        | 0.154        | F | 0.437 | 0.509 | 0.0   | NA    |
|                                              | <i>Hospital-based</i>       | 4 | 1220 | 1199 | 1.125        | 0.839-1.507        | 0.432        | F | 1.819 | 0.611 | 0.0   | 0.581 |
|                                              | <i>HWE in controls</i>      |   |      |      |              |                    |              |   |       |       |       |       |
|                                              | <i>Equilibrium</i>          | 6 | 1536 | 1712 | 1.090        | 0.816-1.456        | 0.561        | F | 4.571 | 0.470 | 0.0   | 0.111 |
|                                              | <i>Quality score</i>        |   |      |      |              |                    |              |   |       |       |       |       |
|                                              | <i>High quality</i>         | 5 | 1468 | 1657 | 1.128        | 0.839-1.515        | 0.425        | F | 3.222 | 0.521 | 0.0   | 0.247 |
|                                              | <i>Low quality</i>          | 1 | 68   | 55   | 0.462        | 0.105-2.024        | 0.305        | F | 0.0   | 1.0   | 0.0   | NA    |
| <b>Heterozygote model<br/>(GA versus GG)</b> | <b>Overall</b>              | 6 | 2020 | 2260 | 0.940        | 0.814-1.085        | 0.397        | F | 8.321 | 0.139 | 39.91 | 0.341 |
|                                              | <i>Geographical region</i>  |   |      |      |              |                    |              |   |       |       |       |       |
|                                              | <i>Asian</i>                | 2 | 677  | 558  | 0.822        | 0.420-1.609        | 0.567        | R | 4.457 | 0.035 | 77.56 | NA    |
|                                              | <i>European</i>             | 1 | 105  | 344  | 0.773        | 0.419-1.427        | 0.411        | F | 0.0   | 1.0   | 0.0   | NA    |
|                                              | <i>American</i>             | 2 | 1010 | 1006 | 0.835        | 0.662-1.054        | 0.129        | F | 1.011 | 0.315 | 1.094 | NA    |
|                                              | <i>Latin American</i>       | 1 | 228  | 352  | 1.149        | 0.806-1.639        | 0.443        | F | 0.0   | 1.0   | 0.0   | NA    |
|                                              | <i>Cancer type</i>          |   |      |      |              |                    |              |   |       |       |       |       |
|                                              | <i>Bladder cancer</i>       | 1 | 733  | 733  | 0.774        | 0.587-1.020        | 0.069        | F | 0.0   | 1.0   | 0.0   | NA    |
|                                              | <i>CLL</i>                  | 1 | 105  | 344  | 0.773        | 0.419-1.427        | 0.411        | F | 0.0   | 1.0   | 0.0   | NA    |
|                                              | <i>CML</i>                  | 1 | 228  | 352  | 1.149        | 0.806-1.639        | 0.443        | F | 0.0   | 1.0   | 0.0   | NA    |
|                                              | <i>Gastric cancer</i>       | 1 | 582  | 466  | 1.101        | 0.861-1.407        | 0.445        | F | 0.0   | 1.0   | 0.0   | NA    |
|                                              | <i>Lung cancer</i>          | 1 | 95   | 92   | <b>0.549</b> | <b>0.303-0.997</b> | <b>0.049</b> | F | 0.0   | 1.0   | 0.0   | NA    |
|                                              | <i>Renal cell carcinoma</i> | 1 | 277  | 273  | 1.006        | 0.654-1.550        | 0.977        | F | 0.0   | 1.0   | 0.0   | NA    |
|                                              | <i>Genotyping method</i>    |   |      |      |              |                    |              |   |       |       |       |       |
|                                              | <i>TaqMan PCR</i>           | 2 | 333  | 696  | 1.040        | 0.765-1.414        | 0.801        | F | 1.203 | 0.273 | 16.88 | NA    |
|                                              | <i>SNPlex technology</i>    | 2 | 1010 | 1006 | 0.835        | 0.662-1.054        | 0.129        | F | 1.011 | 0.315 | 1.094 | NA    |
|                                              | <i>Other methods</i>        | 2 | 677  | 558  | 0.822        | 0.420-1.609        | 0.567        | R | 4.457 | 0.035 | 77.56 | NA    |
|                                              | <i>Source of controls</i>   |   |      |      |              |                    |              |   |       |       |       |       |
|                                              | <i>Population-based</i>     | 2 | 382  | 617  | 0.922        | 0.648-1.312        | 0.653        | F | 0.475 | 0.491 | 0.0   | NA    |
|                                              | <i>Hospital-based</i>       | 4 | 1638 | 1643 | 0.909        | 0.692-1.194        | 0.493        | R | 7.832 | 0.050 | 61.70 | 0.461 |
|                                              | <i>HWE in controls</i>      |   |      |      |              |                    |              |   |       |       |       |       |
|                                              | <i>Equilibrium</i>          | 6 | 2020 | 2260 | 0.940        | 0.814-1.085        | 0.397        | F | 8.321 | 0.139 | 39.91 | 0.341 |
|                                              | <i>Quality score</i>        |   |      |      |              |                    |              |   |       |       |       |       |
|                                              | <i>High quality</i>         | 5 | 1925 | 2168 | 0.971        | 0.838-1.126        | 0.701        | F | 5.016 | 0.286 | 20.25 | 0.774 |
|                                              | <i>Low quality</i>          | 1 | 95   | 92   | <b>0.549</b> | <b>0.303-0.997</b> | <b>0.049</b> | F | 0.0   | 1.0   | 0.0   | NA    |

OR: odds ratio, CI: confidence interval, F: fixed model, R: random model, NA: not appreciable

Supplementary Table S20. Meta-analysis of the association between AGO2 (C &gt; A; rs4961280) variant and cancer risk.

| Comparison                                  | Subgroups            | No. of studies | Sample size |         | Test of association |                    |              |       | Test of heterogeneity |         |                    | Publication bias  |
|---------------------------------------------|----------------------|----------------|-------------|---------|---------------------|--------------------|--------------|-------|-----------------------|---------|--------------------|-------------------|
|                                             |                      |                | Cancer      | Control | OR                  | 95% CI             | P-value      | Model | Q test                | P-value | I <sup>2</sup> (%) | P-value (Egger's) |
| Allelic model<br>(A allele versus C allele) | Overall              | 5              | 3130        | 3532    | 0.895               | 0.787-1.019        | 0.093        | F     | 3.463                 | 0.483   | 0.0                | 0.103             |
|                                             | Geographical region  |                |             |         |                     |                    |              |       |                       |         |                    |                   |
|                                             | Asian                | 1              | 198         | 194     | 0.774               | 0.395-1.516        | 0.455        | F     | 0.0                   | 1.0     | 0.0                | NA                |
|                                             | European             | 2              | 922         | 1334    | <b>0.792</b>        | <b>0.628-0.998</b> | <b>0.048</b> | F     | 1.375                 | 0.241   | 27.25              | NA                |
|                                             | American             | 2              | 2010        | 2004    | 0.957               | 0.816-1.123        | 0.593        | F     | 0.142                 | 0.706   | 0.0                | NA                |
|                                             | Cancer type          |                |             |         |                     |                    |              |       |                       |         |                    |                   |
|                                             | Prostate cancer      | 1              | 710         | 636     | 0.855               | 0.656-1.113        | 0.244        | F     | 0.0                   | 1.0     | 0.0                | NA                |
|                                             | CLL                  | 1              | 212         | 698     | <b>0.617</b>        | <b>0.383-0.994</b> | <b>0.047</b> | F     | 0.0                   | 1.0     | 0.0                | NA                |
|                                             | Lung cancer          | 1              | 198         | 194     | 0.774               | 0.395-1.516        | 0.455        | F     | 0.0                   | 1.0     | 0.0                | NA                |
|                                             | Bladder cancer       | 1              | 1458        | 1450    | 0.975               | 0.809-1.176        | 0.794        | F     | 0.0                   | 1.0     | 0.0                | NA                |
|                                             | Renal cell carcinoma | 1              | 552         | 554     | 0.910               | 0.669-1.238        | 0.549        | F     | 0.0                   | 1.0     | 0.0                | NA                |
|                                             | Genotyping method    |                |             |         |                     |                    |              |       |                       |         |                    |                   |
|                                             | TaqMan PCR           | 2              | 922         | 1334    | <b>0.792</b>        | <b>0.628-0.998</b> | <b>0.048</b> | F     | 1.375                 | 0.241   | 27.25              | NA                |
|                                             | SNPlex technology    | 2              | 2010        | 2004    | 0.957               | 0.816-1.123        | 0.593        | F     | 0.142                 | 0.706   | 0.0                | NA                |
|                                             | Other methods        | 1              | 198         | 194     | 0.774               | 0.395-1.516        | 0.455        | F     | 0.0                   | 1.0     | 0.0                | NA                |
|                                             | Source of controls   |                |             |         |                     |                    |              |       |                       |         |                    |                   |
|                                             | Population-based     | 3              | 1474        | 1888    | 0.833               | 0.692-1.002        | 0.052        | F     | 1.879                 | 0.391   | 0.0                | 0.320             |
|                                             | Hospital-based       | 2              | 1656        | 1644    | 0.959               | 0.801-1.148        | 0.651        | F     | 0.423                 | 0.515   | 0.0                | NA                |
|                                             | HWE in controls      |                |             |         |                     |                    |              |       |                       |         |                    |                   |
|                                             | Equilibrium          | 5              | 3130        | 3532    | 0.895               | 0.787-1.019        | 0.093        | F     | 3.463                 | 0.483   | 0.0                | 0.103             |
|                                             | Quality score        |                |             |         |                     |                    |              |       |                       |         |                    |                   |
|                                             | High quality         | 3              | 2222        | 2702    | 0.916               | 0.787-1.066        | 0.256        | F     | 3.077                 | 0.215   | 35.0               | 0.232             |
|                                             | Low quality          | 2              | 908         | 830     | 0.843               | 0.660-1.078        | 0.175        | F     | 0.073                 | 0.787   | 0.0                | NA                |
| Recessive model<br>(AA versus CC+CA)        | Overall              | 5              | 1565        | 1766    | 0.926               | 0.643-1.333        | 0.680        | F     | 1.352                 | 0.853   | 0.0                | 0.243             |
|                                             | Geographical region  |                |             |         |                     |                    |              |       |                       |         |                    |                   |
|                                             | Asian                | 1              | 99          | 97      | 2.970               | 0.120-73.79        | 0.507        | F     | 0.0                   | 1.0     | 0.0                | NA                |
|                                             | European             | 2              | 461         | 667     | 0.840               | 0.435-1.619        | 0.602        | F     | 0.739                 | 0.390   | 0.0                | NA                |
|                                             | American             | 2              | 1005        | 1002    | 0.947               | 0.609-1.474        | 0.810        | F     | 0.011                 | 0.915   | 0.0                | NA                |
|                                             | Cancer type          |                |             |         |                     |                    |              |       |                       |         |                    |                   |
|                                             | Prostate cancer      | 1              | 355         | 318     | 0.717               | 0.340-1.516        | 0.384        | F     | 0.0                   | 1.0     | 0.0                | NA                |
|                                             | CLL                  | 1              | 106         | 349     | 1.423               | 0.361-5.602        | 0.614        | F     | 0.0                   | 1.0     | 0.0                | NA                |
|                                             | Lung cancer          | 1              | 99          | 97      | 2.970               | 0.120-73.79        | 0.507        | F     | 0.0                   | 1.0     | 0.0                | NA                |
|                                             | Bladder cancer       | 1              | 729         | 725     | 0.961               | 0.575-1.605        | 0.879        | F     | 0.0                   | 1.0     | 0.0                | NA                |
|                                             | Renal cell carcinoma | 1              | 276         | 277     | 0.909               | 0.380-2.177        | 0.831        | F     | 0.0                   | 1.0     | 0.0                | NA                |
|                                             | Genotyping method    |                |             |         |                     |                    |              |       |                       |         |                    |                   |
|                                             | TaqMan PCR           | 2              | 461         | 667     | 0.840               | 0.435-1.619        | 0.602        | F     | 0.739                 | 0.390   | 0.0                | NA                |
|                                             | SNPlex technology    | 2              | 1005        | 1002    | 0.947               | 0.609-1.474        | 0.810        | F     | 0.011                 | 0.915   | 0.0                | NA                |
|                                             | Other methods        | 1              | 99          | 97      | 2.970               | 0.120-73.79        | 0.507        | F     | 0.0                   | 1.0     | 0.0                | NA                |
|                                             | Source of controls   |                |             |         |                     |                    |              |       |                       |         |                    |                   |
|                                             | Population-based     | 3              | 737         | 944     | 0.864               | 0.511-1.460        | 0.585        | F     | 0.759                 | 0.684   | 0.0                | 0.131             |
|                                             | Hospital-based       | 2              | 828         | 822     | 0.988               | 0.595-1.640        | 0.963        | F     | 0.462                 | 0.497   | 0.0                | NA                |
|                                             | HWE in controls      |                |             |         |                     |                    |              |       |                       |         |                    |                   |
|                                             | Equilibrium          | 5              | 1565        | 1766    | 0.926               | 0.643-1.333        | 0.680        | F     | 1.352                 | 0.853   | 0.0                | 0.243             |
|                                             | Quality score        |                |             |         |                     |                    |              |       |                       |         |                    |                   |
|                                             | High quality         | 3              | 1111        | 1351    | 0.984               | 0.646-1.499        | 0.941        | F     | 0.318                 | 0.853   | 0.0                | 0.497             |
|                                             | Low quality          | 2              | 454         | 415     | 0.772               | 0.372-1.599        | 0.486        | F     | 0.712                 | 0.399   | 0.0                | NA                |
| Dominant model<br>(CA+AA versus CC)         | Overall              | 5              | 1565        | 1766    | 0.872               | 0.751-1.014        | 0.075        | F     | 4.978                 | 0.290   | 19.64              | <b>0.083</b>      |
|                                             | Geographical region  |                |             |         |                     |                    |              |       |                       |         |                    |                   |
|                                             | Asian                | 1              | 99          | 97      | 0.698               | 0.339-1.435        | 0.328        | F     | 0.0                   | 1.0     | 0.0                | NA                |
|                                             | European             | 2              | 461         | 667     | <b>0.750</b>        | <b>0.572-0.983</b> | <b>0.037</b> | F     | 2.423                 | 0.120   | 58.73              | NA                |
|                                             | American             | 2              | 1005        | 1002    | 0.951               | 0.790-1.146        | 0.601        | F     | 0.155                 | 0.694   | 0.0                | NA                |
|                                             | Cancer type          |                |             |         |                     |                    |              |       |                       |         |                    |                   |
|                                             | Prostate cancer      | 1              | 355         | 318     | 0.850               | 0.622-1.163        | 0.310        | F     | 0.0                   | 1.0     | 0.0                | NA                |
|                                             | CLL                  | 1              | 106         | 349     | <b>0.519</b>        | <b>0.303-0.888</b> | <b>0.017</b> | F     | 0.0                   | 1.0     | 0.0                | NA                |
|                                             | Lung cancer          | 1              | 99          | 97      | 0.698               | 0.339-1.435        | 0.328        | F     | 0.0                   | 1.0     | 0.0                | NA                |
|                                             | Bladder cancer       | 1              | 729         | 725     | 0.973               | 0.782-1.211        | 0.810        | F     | 0.0                   | 1.0     | 0.0                | NA                |
|                                             | Renal cell carcinoma | 1              | 276         | 277     | 0.895               | 0.626-1.280        | 0.543        | F     | 0.0                   | 1.0     | 0.0                | NA                |
|                                             | Genotyping method    |                |             |         |                     |                    |              |       |                       |         |                    |                   |
|                                             | TaqMan PCR           | 2              | 461         | 667     | <b>0.750</b>        | <b>0.572-0.983</b> | <b>0.037</b> | F     | 2.423                 | 0.120   | 58.73              | NA                |
|                                             | SNPlex technology    | 2              | 1005        | 1002    | 0.951               | 0.790-1.146        | 0.601        | F     | 0.155                 | 0.694   | 0.0                | NA                |
|                                             | Other methods        | 1              | 99          | 97      | 0.698               | 0.339-1.435        | 0.328        | F     | 0.0                   | 1.0     | 0.0                | NA                |
|                                             | Source of controls   |                |             |         |                     |                    |              |       |                       |         |                    |                   |
|                                             | Population-based     | 3              | 737         | 944     | <b>0.800</b>        | <b>0.645-0.992</b> | <b>0.043</b> | F     | 3.019                 | 0.221   | 33.76              | 0.243             |
|                                             | Hospital-based       | 2              | 828         | 822     | 0.947               | 0.768-1.167        | 0.607        | F     | 0.751                 | 0.386   | 0.0                | NA                |
|                                             | HWE in controls      |                |             |         |                     |                    |              |       |                       |         |                    |                   |
|                                             | Equilibrium          | 5              | 1565        | 1766    | 0.872               | 0.751-1.014        | 0.075        | F     | 4.978                 | 0.290   | 19.64              | 0.083             |

|                                      |                      |   |      |      |              |                    |              |   |       |       |       |       |
|--------------------------------------|----------------------|---|------|------|--------------|--------------------|--------------|---|-------|-------|-------|-------|
|                                      | Quality score        |   |      |      |              |                    |              |   |       |       |       |       |
|                                      | High quality         | 3 | 1111 | 1351 | 0.891        | 0.747-1.063        | 0.201        | F | 4.525 | 0.104 | 55.80 | 0.258 |
|                                      | Low quality          | 2 | 454  | 415  | 0.824        | 0.618-1.098        | 0.187        | F | 0.243 | 0.622 | 0.0   | NA    |
|                                      | Overall              | 5 | 1137 | 1244 | 0.897        | 0.621-1.295        | 0.561        | F | 1.181 | 0.881 | 0.0   | 0.344 |
| Homozygote model<br>(AA versus CC)   | Geographical region  |   |      |      |              |                    |              |   |       |       |       |       |
|                                      | Asian                | 1 | 84   | 76   | 2.749        | 0.110-68.49        | 0.538        | F | 0.0   | 1.0   | 0.0   | NA    |
|                                      | European             | 2 | 332  | 458  | 0.781        | 0.402-1.515        | 0.464        | F | 0.491 | 0.483 | 0.0   | NA    |
|                                      | American             | 2 | 721  | 710  | 0.934        | 0.598-1.460        | 0.766        | F | 0.024 | 0.878 | 0.0   | NA    |
|                                      | Cancer type          |   |      |      |              |                    |              |   |       |       |       |       |
|                                      | Prostate cancer      | 1 | 243  | 210  | 0.685        | 0.322-1.460        | 0.328        | F | 0.0   | 1.0   | 0.0   | NA    |
|                                      | CLL                  | 1 | 89   | 248  | 1.201        | 0.304-4.749        | 0.794        | F | 0.0   | 1.0   | 0.0   | NA    |
|                                      | Lung cancer          | 1 | 84   | 76   | 2.749        | 0.110-68.49        | 0.538        | F | 0.0   | 1.0   | 0.0   | NA    |
|                                      | Bladder cancer       | 1 | 520  | 514  | 0.954        | 0.569-1.600        | 0.858        | F | 0.0   | 1.0   | 0.0   | NA    |
|                                      | Renal cell carcinoma | 1 | 201  | 196  | 0.881        | 0.365-2.123        | 0.777        | F | 0.0   | 1.0   | 0.0   | NA    |
|                                      | Genotyping method    |   |      |      |              |                    |              |   |       |       |       |       |
|                                      | TaqMan PCR           | 2 | 332  | 458  | 0.781        | 0.402-1.515        | 0.464        | F | 0.491 | 0.483 | 0.0   | NA    |
|                                      | SNPlex technology    | 2 | 721  | 710  | 0.934        | 0.598-1.460        | 0.766        | F | 0.024 | 0.878 | 0.0   | NA    |
|                                      | Other methods        | 1 | 84   | 76   | 2.749        | 0.110-68.49        | 0.538        | F | 0.0   | 1.0   | 0.0   | NA    |
|                                      | Source of controls   |   |      |      |              |                    |              |   |       |       |       |       |
|                                      | Population-based     | 3 | 533  | 654  | 0.815        | 0.480-1.385        | 0.450        | F | 0.537 | 0.765 | 0.0   | 0.218 |
|                                      | Hospital-based       | 2 | 604  | 590  | 0.980        | 0.588-1.633        | 0.937        | F | 0.406 | 0.524 | 0.0   | NA    |
|                                      | HWE in controls      |   |      |      |              |                    |              |   |       |       |       |       |
|                                      | Equilibrium          | 5 | 1137 | 1244 | 0.897        | 0.621-1.295        | 0.561        | F | 1.181 | 0.881 | 0.0   | 0.344 |
|                                      | Quality score        |   |      |      |              |                    |              |   |       |       |       |       |
|                                      | High quality         | 3 | 810  | 958  | 0.957        | 0.626-1.463        | 0.839        | F | 0.139 | 0.933 | 0.0   | 0.647 |
|                                      | Low quality          | 2 | 327  | 286  | 0.737        | 0.353-1.539        | 0.417        | F | 0.679 | 0.410 | 0.0   | NA    |
| Heterozygote model<br>(CA versus CC) | Overall              | 5 | 1508 | 1701 | 0.871        | 0.745-1.019        | 0.085        | F | 6.021 | 0.198 | 33.56 | 0.070 |
|                                      | Geographical region  |   |      |      |              |                    |              |   |       |       |       |       |
|                                      | Asian                | 1 | 98   | 97   | 0.654        | 0.315-1.360        | 0.256        | F | 0.0   | 1.0   | 0.0   | NA    |
|                                      | European             | 2 | 445  | 644  | 0.673        | 0.370-1.224        | 0.194        | R | 3.400 | 0.065 | 70.59 | NA    |
|                                      | American             | 2 | 965  | 960  | 0.954        | 0.785-1.160        | 0.636        | F | 0.145 | 0.704 | 0.0   | NA    |
|                                      | Cancer type          |   |      |      |              |                    |              |   |       |       |       |       |
|                                      | Prostate cancer      | 1 | 342  | 302  | 0.875        | 0.631-1.212        | 0.421        | F | 0.0   | 1.0   | 0.0   | NA    |
|                                      | CLL                  | 1 | 103  | 342  | <b>0.472</b> | <b>0.267-0.834</b> | <b>0.010</b> | F | 0.0   | 1.0   | 0.0   | NA    |
|                                      | Lung cancer          | 1 | 98   | 97   | 0.654        | 0.315-1.360        | 0.256        | F | 0.0   | 1.0   | 0.0   | NA    |
|                                      | Bladder cancer       | 1 | 699  | 694  | 0.976        | 0.777-1.227        | 0.838        | F | 0.0   | 1.0   | 0.0   | NA    |
|                                      | Renal cell carcinoma | 1 | 266  | 266  | 0.897        | 0.617-1.303        | 0.568        | F | 0.0   | 1.0   | 0.0   | NA    |
|                                      | Genotyping method    |   |      |      |              |                    |              |   |       |       |       |       |
|                                      | TaqMan PCR           | 2 | 445  | 644  | 0.673        | 0.370-1.224        | 0.194        | R | 3.400 | 0.065 | 70.59 | NA    |
|                                      | SNPlex technology    | 2 | 965  | 960  | 0.954        | 0.785-1.160        | 0.636        | F | 0.145 | 0.704 | 0.0   | NA    |
|                                      | Other methods        | 1 | 98   | 97   | 0.654        | 0.315-1.360        | 0.256        | F | 0.0   | 1.0   | 0.0   | NA    |
|                                      | Source of controls   |   |      |      |              |                    |              |   |       |       |       |       |
|                                      | Population-based     | 3 | 711  | 910  | 0.801        | 0.639-1.004        | 0.054        | F | 3.950 | 0.139 | 49.37 | 0.197 |
|                                      | Hospital-based       | 2 | 797  | 791  | 0.942        | 0.757-1.172        | 0.593        | F | 1.048 | 0.306 | 4.614 | NA    |
|                                      | HWE in controls      |   |      |      |              |                    |              |   |       |       |       |       |
|                                      | Equilibrium          | 5 | 1508 | 1701 | 0.871        | 0.745-1.019        | 0.085        | F | 6.021 | 0.198 | 33.56 | 0.070 |
|                                      | Quality score        |   |      |      |              |                    |              |   |       |       |       |       |
|                                      | High quality         | 3 | 1068 | 1302 | 0.806        | 0.567-1.146        | 0.231        | R | 5.399 | 0.067 | 62.96 | 0.267 |
|                                      | Low quality          | 2 | 440  | 399  | 0.834        | 0.619-1.123        | 0.231        | F | 0.506 | 0.477 | 0.0   | NA    |

OR: odds ratio, CI: confidence interval, F: fixed model, R: random model, NA: not appreciable

Supplementary Table S21. Meta-analysis of the association between **GEMIN3 (T > C; rs197412)** variant and cancer risk.

| Comparison                                  | Subgroups            | No. of studies | Sample size |         | Test of association |             |         |       | Test of heterogeneity |         |                    | Publication bias  |
|---------------------------------------------|----------------------|----------------|-------------|---------|---------------------|-------------|---------|-------|-----------------------|---------|--------------------|-------------------|
|                                             |                      |                | Cancer      | Control | OR                  | 95% CI      | P-value | Model | Q test                | P-value | I <sup>2</sup> (%) | P-value (Egger's) |
| Allelic model<br>(C allele versus T allele) | Overall              | 9              | 7122        | 10602   | 1.008               | 0.929-1.094 | 0.848   | R     | 17.89                 | 0.022   | 55.29              | 0.351             |
|                                             | Geographical region  |                |             |         |                     |             |         |       |                       |         |                    |                   |
|                                             | Asian                | 5              | 4536        | 6840    | 0.919               | 0.847-0.997 | 0.042   | F     | 6.520                 | 0.164   | 38.65              | 0.937             |
|                                             | European             | 1              | 202         | 688     | 1.116               | 0.809-1.538 | 0.504   | F     | 0.0                   | 1.0     | 0.0                | NA                |
|                                             | American             | 3              | 2384        | 3074    | 1.125               | 1.006-1.259 | 0.038   | F     | 2.573                 | 0.276   | 22.28              | 0.025             |
|                                             | Cancer type          |                |             |         |                     |             |         |       |                       |         |                    |                   |
|                                             | Oral cancer          | 2              | 1496        | 1788    | 0.809               | 0.698-0.937 | 0.005   | F     | 0.054                 | 0.817   | 0.0                | NA                |
|                                             | Bladder Cancer       | 1              | 1470        | 1460    | 1.040               | 0.898-1.206 | 0.600   | F     | 0.0                   | 1.0     | 0.0                | NA                |
|                                             | Breast cancer        | 1              | 1706        | 1772    | 0.909               | 0.790-1.046 | 0.182   | F     | 0.0                   | 1.0     | 0.0                | NA                |
|                                             | CLL                  | 1              | 202         | 688     | 1.116               | 0.809-1.538 | 0.504   | F     | 0.0                   | 1.0     | 0.0                | NA                |
|                                             | Head/neck carcinoma  | 1              | 1150        | 3100    | 1.015               | 0.880-1.171 | 0.838   | F     | 0.0                   | 1.0     | 0.0                | NA                |
|                                             | Lung cancer          | 1              | 184         | 180     | 1.217               | 0.797-1.858 | 0.362   | F     | 0.0                   | 1.0     | 0.0                | NA                |
|                                             | NHL                  | 1              | 360         | 1058    | 1.255               | 0.986-1.597 | 0.064   | F     | 0.0                   | 1.0     | 0.0                | NA                |
|                                             | Renal cell carcinoma | 1              | 554         | 556     | 1.248               | 0.978-1.592 | 0.075   | F     | 0.0                   | 1.0     | 0.0                | NA                |
|                                             | Genotyping method    |                |             |         |                     |             |         |       |                       |         |                    |                   |
|                                             | TaqMan PCR           | 4              | 3404        | 4248    | 0.881               | 0.799-0.970 | 0.010   | F     | 3.621                 | 0.305   | 17.14              | 0.746             |
|                                             | SNPlex technology    | 2              | 2024        | 2016    | 1.092               | 0.963-1.239 | 0.170   | F     | 1.568                 | 0.210   | 36.23              | NA                |
|                                             | Other methods        | 3              | 1694        | 4338    | 1.083               | 0.963-1.219 | 0.184   | F     | 2.527                 | 0.283   | 20.86              | 0.422             |
|                                             | Source of controls   |                |             |         |                     |             |         |       |                       |         |                    |                   |
|                                             | Population-based     | 4              | 3612        | 6116    | 1.005               | 0.920-1.099 | 0.907   | F     | 5.429                 | 0.143   | 44.73              | 0.248             |
|                                             | Hospital-based       | 5              | 3510        | 4486    | 0.984               | 0.826-1.173 | 0.860   | R     | 12.25                 | 0.016   | 67.34              | 0.769             |
|                                             | HWE in controls      |                |             |         |                     |             |         |       |                       |         |                    |                   |
|                                             | Equilibrium          | 8              | 5652        | 9142    | 1.003               | 0.889-1.132 | 0.960   | R     | 17.37                 | 0.015   | 59.71              | 0.293             |
|                                             | Disequilibrium       | 1              | 1470        | 1460    | 1.040               | 0.898-1.206 | 0.600   | F     | 0.0                   | 1.0     | 0.0                | NA                |
|                                             | Quality score        |                |             |         |                     |             |         |       |                       |         |                    |                   |
|                                             | High quality         | 7              | 6342        | 9528    | 1.024               | 0.921-1.137 | 0.663   | R     | 12.93                 | 0.044   | 53.61              | 0.259             |
|                                             | Low quality          | 2              | 780         | 1074    | 0.945               | 0.625-1.428 | 0.787   | R     | 3.090                 | 0.079   | 67.64              | NA                |
| Recessive model<br>(CC versus TT+TC)        | Overall              | 9              | 3561        | 5301    | 1.069               | 0.912-1.254 | 0.409   | R     | 15.82                 | 0.045   | 49.43              | 0.783             |
|                                             | Geographical region  |                |             |         |                     |             |         |       |                       |         |                    |                   |
|                                             | Asian                | 5              | 2268        | 3420    | 0.869               | 0.731-1.033 | 0.112   | F     | 7.598                 | 0.107   | 47.36              | 0.549             |
|                                             | European             | 1              | 101         | 344     | 1.034               | 0.562-1.900 | 0.916   | F     | 0.0                   | 1.0     | 0.0                | NA                |
|                                             | American             | 3              | 1192        | 1537    | 1.273               | 1.027-1.577 | 0.027   | F     | 0.840                 | 0.657   | 0.0                | 0.182             |
|                                             | Cancer type          |                |             |         |                     |             |         |       |                       |         |                    |                   |
|                                             | Oral cancer          | 2              | 748         | 894     | 0.607               | 0.438-0.841 | 0.003   | F     | 0.004                 | 0.948   | 0.0                | NA                |
|                                             | Bladder Cancer       | 1              | 735         | 730     | 1.164               | 0.874-1.551 | 0.299   | F     | 0.0                   | 1.0     | 0.0                | NA                |
|                                             | Breast cancer        | 1              | 853         | 886     | 0.892               | 0.665-1.197 | 0.447   | F     | 0.0                   | 1.0     | 0.0                | NA                |
|                                             | CLL                  | 1              | 101         | 344     | 1.034               | 0.562-1.900 | 0.916   | F     | 0.0                   | 1.0     | 0.0                | NA                |
|                                             | Head/neck carcinoma  | 1              | 575         | 1550    | 1.114               | 0.827-1.501 | 0.476   | F     | 0.0                   | 1.0     | 0.0                | NA                |
|                                             | Lung cancer          | 1              | 92          | 90      | 1.086               | 0.437-2.700 | 0.858   | F     | 0.0                   | 1.0     | 0.0                | NA                |
|                                             | NHL                  | 1              | 180         | 529     | 1.425               | 0.933-2.175 | 0.101   | F     | 0.0                   | 1.0     | 0.0                | NA                |
|                                             | Renal cell carcinoma | 1              | 277         | 278     | 1.424               | 0.866-2.341 | 0.164   | F     | 0.0                   | 1.0     | 0.0                | NA                |
|                                             | Genotyping method    |                |             |         |                     |             |         |       |                       |         |                    |                   |
|                                             | TaqMan PCR           | 4              | 1702        | 2124    | 0.778               | 0.634-0.956 | 0.017   | F     | 3.904                 | 0.272   | 23.16              | 0.730             |
|                                             | SNPlex technology    | 2              | 1012        | 1008    | 1.224               | 0.955-1.569 | 0.110   | F     | 0.473                 | 0.492   | 0.0                | NA                |
|                                             | Other methods        | 3              | 847         | 2169    | 1.200               | 0.949-1.519 | 0.128   | F     | 0.916                 | 0.633   | 0.0                | 0.907             |
|                                             | Source of controls   |                |             |         |                     |             |         |       |                       |         |                    |                   |
|                                             | Population-based     | 4              | 1806        | 3058    | 1.049               | 0.873-1.261 | 0.609   | F     | 2.777                 | 0.427   | 0.0                | 0.510             |
|                                             | Hospital-based       | 5              | 1755        | 2243    | 0.923               | 0.641-1.329 | 0.666   | R     | 12.73                 | 0.013   | 68.58              | 0.620             |
|                                             | HWE in controls      |                |             |         |                     |             |         |       |                       |         |                    |                   |
|                                             | Equilibrium          | 8              | 2826        | 4571    | 0.971               | 0.773-1.220 | 0.801   | R     | 14.65                 | 0.041   | 52.21              | 0.984             |
|                                             | Disequilibrium       | 1              | 735         | 730     | 1.164               | 0.874-1.551 | 0.299   | F     | 0.0                   | 1.0     | 0.0                | NA                |
|                                             | Quality score        |                |             |         |                     |             |         |       |                       |         |                    |                   |
|                                             | High quality         | 7              | 3171        | 4764    | 1.051               | 0.860-1.284 | 0.627   | R     | 11.60                 | 0.072   | 48.27              | 0.948             |
|                                             | Low quality          | 2              | 390         | 537     | 0.699               | 0.453-1.079 | 0.106   | F     | 1.165                 | 0.280   | 14.16              | NA                |
| Dominant model<br>(TC+CC versus TT)         | Overall              | 9              | 3561        | 5301    | 0.978               | 0.895-1.070 | 0.629   | F     | 11.68                 | 0.166   | 31.52              | 0.062             |
|                                             | Geographical region  |                |             |         |                     |             |         |       |                       |         |                    |                   |
|                                             | Asian                | 5              | 2268        | 3420    | 0.909               | 0.815-1.015 | 0.089   | F     | 3.970                 | 0.410   | 0.0                | 0.486             |
|                                             | European             | 1              | 101         | 344     | 1.224               | 0.772-1.941 | 0.389   | F     | 0.0                   | 1.0     | 0.0                | NA                |
|                                             | American             | 3              | 1192        | 1537    | 1.119               | 0.950-1.318 | 0.178   | F     | 2.503                 | 0.286   | 20.10              | 0.081             |
|                                             | Cancer type          |                |             |         |                     |             |         |       |                       |         |                    |                   |
|                                             | Oral cancer          | 2              | 748         | 894     | 0.828               | 0.680-1.008 | 0.059   | F     | 0.108                 | 0.742   | 0.0                | NA                |
|                                             | Bladder Cancer       | 1              | 735         | 730     | 0.998               | 0.804-1.239 | 0.986   | F     | 0.0                   | 1.0     | 0.0                | NA                |
|                                             | Breast cancer        | 1              | 853         | 886     | 0.880               | 0.728-1.064 | 0.188   | F     | 0.0                   | 1.0     | 0.0                | NA                |
|                                             | CLL                  | 1              | 101         | 344     | 1.224               | 0.772-1.941 | 0.389   | F     | 0.0                   | 1.0     | 0.0                | NA                |
|                                             | Head/neck carcinoma  | 1              | 575         | 1550    | 0.983               | 0.810-1.192 | 0.860   | F     | 0.0                   | 1.0     | 0.0                | NA                |

|                                      |                             |   |      |      |              |                    |              |   |       |       |       |              |
|--------------------------------------|-----------------------------|---|------|------|--------------|--------------------|--------------|---|-------|-------|-------|--------------|
|                                      | <i>Lung cancer</i>          | 1 | 92   | 90   | 1.455        | 0.787-2.687        | 0.232        | F | 0.0   | 1.0   | 0.0   | NA           |
|                                      | <i>NHL</i>                  | 1 | 180  | 529  | 1.297        | 0.900-1.868        | 0.163        | F | 0.0   | 1.0   | 0.0   | NA           |
|                                      | <i>Renal cell carcinoma</i> | 1 | 277  | 278  | 1.309        | 0.929-1.846        | 0.124        | F | 0.0   | 1.0   | 0.0   | NA           |
|                                      | Genotyping method           |   |      |      |              |                    |              |   |       |       |       |              |
|                                      | <i>TaqMan PCR</i>           | 4 | 1702 | 2124 | 0.880        | 0.772-1.003        | 0.055        | F | 2.453 | 0.484 | 0.0   | 0.413        |
|                                      | <i>SNPlex technology</i>    | 2 | 1012 | 1008 | 1.078        | 0.898-1.295        | 0.420        | F | 1.716 | 0.190 | 41.73 | NA           |
|                                      | <i>Other methods</i>        | 3 | 847  | 2169 | 1.069        | 0.907-1.260        | 0.424        | F | 2.774 | 0.250 | 27.89 | 0.195        |
|                                      | Source of controls          |   |      |      |              |                    |              |   |       |       |       |              |
|                                      | <i>Population-based</i>     | 4 | 1806 | 3058 | 0.989        | 0.876-1.117        | 0.856        | F | 4.837 | 0.184 | 37.98 | 0.145        |
|                                      | <i>Hospital-based</i>       | 5 | 1755 | 2243 | 0.966        | 0.847-1.102        | 0.606        | F | 6.779 | 0.148 | 40.99 | 0.315        |
|                                      | HWE in controls             |   |      |      |              |                    |              |   |       |       |       |              |
|                                      | <i>Equilibrium</i>          | 8 | 2826 | 4571 | 0.974        | 0.883-1.075        | 0.602        | F | 11.64 | 0.113 | 39.87 | <b>0.071</b> |
|                                      | <i>Disequilibrium</i>       | 1 | 735  | 730  | 0.998        | 0.804-1.239        | 0.986        | F | 0.0   | 1.0   | 0.0   | NA           |
|                                      | Quality score               |   |      |      |              |                    |              |   |       |       |       |              |
|                                      | <i>High quality</i>         | 7 | 3171 | 4764 | 0.990        | 0.900-1.088        | 0.831        | F | 8.181 | 0.225 | 26.66 | <b>0.052</b> |
|                                      | <i>Low quality</i>          | 2 | 390  | 537  | 1.012        | 0.569-1.799        | 0.969        | R | 2.988 | 0.084 | 66.53 | NA           |
| Homozygote model<br>(CC versus TT)   | Overall                     | 9 | 1900 | 2820 | 1.085        | 0.910-1.294        | 0.364        | R | 19.15 | 0.014 | 58.23 | 0.749        |
|                                      | Geographical region         |   |      |      |              |                    |              |   |       |       |       |              |
|                                      | <i>Asian</i>                | 5 | 1249 | 1857 | 0.810        | 0.609-1.077        | 0.147        | R | 8.225 | 0.084 | 51.37 | 0.775        |
|                                      | <i>European</i>             | 1 | 52   | 192  | 1.166        | 0.597-2.275        | 0.653        | F | 0.0   | 1.0   | 0.0   | NA           |
|                                      | <i>American</i>             | 3 | 599  | 771  | <b>1.319</b> | <b>1.039-1.673</b> | <b>0.023</b> | F | 1.924 | 0.382 | 0.0   | 0.100        |
|                                      | Cancer type                 |   |      |      |              |                    |              |   |       |       |       |              |
|                                      | <i>Oral cancer</i>          | 2 | 416  | 498  | <b>0.576</b> | <b>0.409-0.812</b> | <b>0.002</b> | F | 0.002 | 0.967 | 0.0   | NA           |
|                                      | <i>Bladder Cancer</i>       | 1 | 367  | 350  | 1.136        | 0.827-1.561        | 0.430        | F | 0.0   | 1.0   | 0.0   | NA           |
|                                      | <i>Breast cancer</i>        | 1 | 474  | 475  | 0.841        | 0.616-1.148        | 0.275        | F | 0.0   | 1.0   | 0.0   | NA           |
|                                      | <i>CLL</i>                  | 1 | 52   | 192  | 1.166        | 0.597-2.275        | 0.653        | F | 0.0   | 1.0   | 0.0   | NA           |
|                                      | <i>Head/neck carcinoma</i>  | 1 | 320  | 839  | 1.090        | 0.795-1.494        | 0.593        | F | 0.0   | 1.0   | 0.0   | NA           |
|                                      | <i>Lung cancer</i>          | 1 | 39   | 45   | 1.375        | 0.511-3.701        | 0.528        | F | 0.0   | 1.0   | 0.0   | NA           |
|                                      | <i>NHL</i>                  | 1 | 93   | 275  | 1.587        | 0.978-2.576        | 0.062        | F | 0.0   | 1.0   | 0.0   | NA           |
|                                      | <i>Renal cell carcinoma</i> | 1 | 139  | 146  | 1.606        | 0.939-2.748        | 0.084        | F | 0.0   | 1.0   | 0.0   | NA           |
|                                      | Genotyping method           |   |      |      |              |                    |              |   |       |       |       |              |
|                                      | <i>TaqMan PCR</i>           | 4 | 942  | 1165 | <b>0.747</b> | <b>0.601-0.929</b> | <b>0.009</b> | F | 4.460 | 0.216 | 32.74 | 0.956        |
|                                      | <i>SNPlex technology</i>    | 2 | 506  | 496  | 1.243        | 0.946-1.634        | 0.119        | F | 1.182 | 0.277 | 15.37 | NA           |
|                                      | <i>Other methods</i>        | 3 | 452  | 1159 | 1.229        | 0.952-1.586        | 0.114        | F | 1.678 | 0.432 | 0.0   | 0.601        |
|                                      | Source of controls          |   |      |      |              |                    |              |   |       |       |       |              |
|                                      | <i>Population-based</i>     | 4 | 985  | 1652 | 1.042        | 0.856-1.267        | 0.684        | F | 4.507 | 0.212 | 33.44 | 0.339        |
|                                      | <i>Hospital-based</i>       | 5 | 915  | 1168 | 0.935        | 0.614-1.422        | 0.753        | R | 14.27 | 0.006 | 71.96 | 0.908        |
|                                      | HWE in controls             |   |      |      |              |                    |              |   |       |       |       |              |
|                                      | <i>Equilibrium</i>          | 8 | 1533 | 2470 | 0.991        | 0.753-1.304        | 0.950        | R | 18.35 | 0.010 | 61.86 | 0.627        |
|                                      | <i>Disequilibrium</i>       | 1 | 367  | 350  | 1.136        | 0.827-1.561        | 0.430        | F | 0.0   | 1.0   | 0.0   | NA           |
| Heterozygote model<br>(TC versus TT) | Quality score               |   |      |      |              |                    |              |   |       |       |       |              |
|                                      | <i>High quality</i>         | 7 | 1692 | 2526 | 1.061        | 0.835-1.347        | 0.629        | R | 14.01 | 0.030 | 57.17 | 0.566        |
|                                      | <i>Low quality</i>          | 2 | 208  | 294  | 0.690        | 0.436-1.090        | 0.112        | F | 2.372 | 0.123 | 57.85 | NA           |
|                                      | Overall                     | 9 | 3110 | 4625 | 0.979        | 0.891-1.075        | 0.655        | F | 6.875 | 0.550 | 0.0   | <b>0.007</b> |
|                                      | Geographical region         |   |      |      |              |                    |              |   |       |       |       |              |
|                                      | <i>Asian</i>                | 5 | 2032 | 3017 | 0.930        | 0.829-1.044        | 0.220        | F | 2.476 | 0.649 | 0.0   | 0.177        |
|                                      | <i>European</i>             | 1 | 85   | 291  | 1.245        | 0.764-2.027        | 0.379        | F | 0.0   | 1.0   | 0.0   | NA           |
|                                      | <i>American</i>             | 3 | 993  | 1317 | 1.063        | 0.895-1.263        | 0.484        | F | 1.830 | 0.401 | 0.0   | 0.137        |
|                                      | Cancer type                 |   |      |      |              |                    |              |   |       |       |       |              |
|                                      | <i>Oral cancer</i>          | 2 | 686  | 778  | 0.901        | 0.733-1.108        | 0.325        | F | 0.129 | 0.720 | 0.0   | NA           |
|                                      | <i>Bladder Cancer</i>       | 1 | 617  | 627  | 0.961        | 0.766-1.205        | 0.729        | F | 0.0   | 1.0   | 0.0   | NA           |
|                                      | <i>Breast cancer</i>        | 1 | 759  | 778  | 0.891        | 0.729-1.088        | 0.257        | F | 0.0   | 1.0   | 0.0   | NA           |
|                                      | <i>CLL</i>                  | 1 | 85   | 291  | 1.245        | 0.764-2.027        | 0.379        | F | 0.0   | 1.0   | 0.0   | NA           |
|                                      | <i>Head/neck carcinoma</i>  | 1 | 506  | 1381 | 0.957        | 0.781-1.174        | 0.675        | F | 0.0   | 1.0   | 0.0   | NA           |
|                                      | <i>Lung cancer</i>          | 1 | 81   | 80   | 1.472        | 0.779-2.782        | 0.233        | F | 0.0   | 1.0   | 0.0   | NA           |
|                                      | <i>NHL</i>                  | 1 | 141  | 443  | 1.199        | 0.813-1.768        | 0.360        | F | 0.0   | 1.0   | 0.0   | NA           |
|                                      | <i>Renal cell carcinoma</i> | 1 | 235  | 247  | 1.239        | 0.864-1.777        | 0.243        | F | 0.0   | 1.0   | 0.0   | NA           |
|                                      | Genotyping method           |   |      |      |              |                    |              |   |       |       |       |              |
|                                      | <i>TaqMan PCR</i>           | 4 | 1530 | 1847 | 0.920        | 0.801-1.056        | 0.234        | F | 1.742 | 0.628 | 0.0   | 0.210        |
|                                      | <i>SNPlex technology</i>    | 2 | 852  | 874  | 1.033        | 0.852-1.251        | 0.742        | F | 1.375 | 0.241 | 27.25 | NA           |
|                                      | <i>Other methods</i>        | 3 | 728  | 1904 | 1.034        | 0.869-1.230        | 0.706        | F | 2.291 | 0.318 | 12.71 | <b>0.070</b> |
|                                      | Source of controls          |   |      |      |              |                    |              |   |       |       |       |              |
|                                      | <i>Population-based</i>     | 4 | 1585 | 2697 | 0.978        | 0.860-1.111        | 0.731        | F | 3.480 | 0.323 | 13.80 | <b>0.078</b> |
|                                      | <i>Hospital-based</i>       | 5 | 1525 | 1928 | 0.980        | 0.853-1.126        | 0.775        | F | 3.394 | 0.494 | 0.0   | 0.121        |
|                                      | HWE in controls             |   |      |      |              |                    |              |   |       |       |       |              |
|                                      | <i>Equilibrium</i>          | 8 | 2493 | 3998 | 0.983        | 0.886-1.090        | 0.739        | F | 6.843 | 0.445 | 0.0   | <b>0.013</b> |
|                                      | <i>Disequilibrium</i>       | 1 | 617  | 627  | 0.961        | 0.766-1.205        | 0.729        | F | 0.0   | 1.0   | 0.0   | NA           |
|                                      | Quality score               |   |      |      |              |                    |              |   |       |       |       |              |

|  |                     |   |      |      |       |             |       |   |       |       |       |              |
|--|---------------------|---|------|------|-------|-------------|-------|---|-------|-------|-------|--------------|
|  | <i>High quality</i> | 7 | 2756 | 4156 | 0.982 | 0.888-1.085 | 0.716 | F | 4.669 | 0.587 | 0.0   | <b>0.006</b> |
|  | <i>Low quality</i>  | 2 | 354  | 469  | 0.957 | 0.724-1.264 | 0.757 | F | 2.177 | 0.140 | 54.07 | NANA         |

OR: odds ratio, CI: confidence interval, F: fixed model, R: random model, NA: not appreciable

**Supplementary Table S22. Meta-analysis of the association between *GEMIN3* (C > A; rs197414) variant and cancer risk.**

| Comparison                                          | Subgroups                   | No. of studies | Sample size |         | Test of association |                    |              |       | Test of heterogeneity |         |                    | Publication bias  |
|-----------------------------------------------------|-----------------------------|----------------|-------------|---------|---------------------|--------------------|--------------|-------|-----------------------|---------|--------------------|-------------------|
|                                                     |                             |                | Cancer      | Control | OR                  | 95% CI             | P-value      | Model | Q test                | P-value | I <sup>2</sup> (%) | P-value (Egger's) |
| <b>Allelic model<br/>(A allele versus C allele)</b> | <b>Overall</b>              | 5              | 3132        | 3518    | 1.090               | 0.939-1.264        | 0.257        | F     | 7.453                 | 0.114   | 46.33              | 0.886             |
|                                                     | <b>Geographical region</b>  |                |             |         |                     |                    |              |       |                       |         |                    |                   |
|                                                     | <i>Asian</i>                | 1              | 200         | 198     | 0.196               | 0.009-4.109        | 0.294        | F     | 0.0                   | 1.0     | 0.0                | NA                |
|                                                     | <i>European</i>             | 2              | 896         | 1280    | 1.195               | 0.613-2.332        | 0.601        | R     | 6.064                 | 0.014   | 83.51              | NA                |
|                                                     | <i>American</i>             | 2              | 2036        | 2040    | 1.104               | 0.919-1.326        | 0.292        | F     | 0.140                 | 0.708   | 0.0                | NA                |
|                                                     | <b>Cancer type</b>          |                |             |         |                     |                    |              |       |                       |         |                    |                   |
|                                                     | <i>Prostate cancer</i>      | 1              | 706         | 638     | 0.867               | 0.639-1.177        | 0.361        | F     | 0.0                   | 1.0     | 0.0                | NA                |
|                                                     | <i>CLL</i>                  | 1              | 190         | 642     | <b>1.718</b>        | <b>1.095-2.694</b> | <b>0.018</b> | F     | 0.0                   | 1.0     | 0.0                | NA                |
|                                                     | <i>Lung cancer</i>          | 1              | 200         | 198     | 0.196               | 0.009-4.109        | 0.294        | F     | 0.0                   | 1.0     | 0.0                | NA                |
|                                                     | <i>Bladder cancer</i>       | 1              | 1480        | 1484    | 1.082               | 0.876-1.337        | 0.465        | F     | 0.0                   | 1.0     | 0.0                | NA                |
|                                                     | <i>Renal cell carcinoma</i> | 1              | 556         | 556     | 1.174               | 0.810-1.700        | 0.396        | F     | 0.0                   | 1.0     | 0.0                | NA                |
|                                                     | <b>Genotyping method</b>    |                |             |         |                     |                    |              |       |                       |         |                    |                   |
|                                                     | <i>SNPlex technology</i>    | 2              | 2036        | 2040    | 1.104               | 0.919-1.326        | 0.292        | F     | 0.140                 | 0.708   | 0.0                | NA                |
|                                                     | <i>Other methods</i>        | 3              | 1096        | 1478    | 1.106               | 0.573-2.134        | 0.764        | R     | 7.258                 | 0.027   | 72.45              | 0.920             |
|                                                     | <b>Source of controls</b>   |                |             |         |                     |                    |              |       |                       |         |                    |                   |
|                                                     | <i>Population-based</i>     | 2              | 746         | 1198    | <b>1.369</b>        | <b>1.028-1.822</b> | <b>0.031</b> | F     | 1.639                 | 0.200   | 38.98              | NA                |
|                                                     | <i>Hospital-based</i>       | 3              | 2386        | 2320    | 1.002               | 0.842-1.192        | 0.984        | F     | 2.469                 | 0.291   | 19.00              | 0.361             |
|                                                     | <i>HWE in controls</i>      |                |             |         |                     |                    |              |       |                       |         |                    |                   |
|                                                     | <i>Equilibrium</i>          | 4              | 2932        | 3320    | 1.094               | 0.943-1.269        | 0.235        | F     | 6.229                 | 0.101   | 51.84              | 0.469             |
|                                                     | <i>Disequilibrium</i>       | 1              | 200         | 198     | 0.196               | 0.009-4.109        | 0.294        | F     | 0.0                   | 1.0     | 0.0                | NA                |
|                                                     | <b>Quality score</b>        |                |             |         |                     |                    |              |       |                       |         |                    |                   |
|                                                     | <i>High quality</i>         | 3              | 2226        | 2682    | 1.176               | 0.992-1.394        | 0.062        | F     | 3.319                 | 0.190   | 39.74              | 0.337             |
|                                                     | <i>Low quality</i>          | 2              | 906         | 836     | 0.854               | 0.630-1.158        | 0.311        | F     | 0.908                 | 0.341   | 0.0                | NA                |
| <b>Recessive model<br/>(AA versus CC+CA)</b>        | <b>Overall</b>              | 5              | 1566        | 1759    | <b>1.729</b>        | <b>1.055-2.832</b> | <b>0.030</b> | F     | 6.263                 | 0.180   | 36.13              | 0.625             |
|                                                     | <b>Geographical region</b>  |                |             |         |                     |                    |              |       |                       |         |                    |                   |
|                                                     | <i>Asian</i>                | 1              | 100         | 99      | 0.327               | 0.013-8.117        | 0.495        | F     | 0.0                   | 1.0     | 0.0                | NA                |
|                                                     | <i>European</i>             | 2              | 448         | 640     | 1.436               | 0.415-4.960        | 0.568        | R     | 2.805                 | 0.094   | 64.35              | NA                |
|                                                     | <i>American</i>             | 2              | 1018        | 1020    | <b>2.571</b>        | <b>1.268-5.214</b> | <b>0.009</b> | F     | 0.443                 | 0.506   | 0.0                | NA                |
|                                                     | <b>Cancer type</b>          |                |             |         |                     |                    |              |       |                       |         |                    |                   |
|                                                     | <i>Prostate cancer</i>      | 1              | 353         | 319     | 0.816               | 0.342-1.949        | 0.648        | F     | 0.0                   | 1.0     | 0.0                | NA                |
|                                                     | <i>CLL</i>                  | 1              | 95          | 321     | 2.917               | 0.870-9.778        | 0.083        | F     | 0.0                   | 1.0     | 0.0                | NA                |
|                                                     | <i>Lung cancer</i>          | 1              | 100         | 99      | 0.327               | 0.013-8.117        | 0.495        | F     | 0.0                   | 1.0     | 0.0                | NA                |
|                                                     | <i>Bladder cancer</i>       | 1              | 740         | 742     | <b>2.943</b>        | <b>1.308-6.623</b> | <b>0.009</b> | F     | 0.0                   | 1.0     | 0.0                | NA                |
|                                                     | <i>Renal cell carcinoma</i> | 1              | 278         | 278     | 1.679               | 0.397-7.094        | 0.481        | F     | 0.0                   | 1.0     | 0.0                | NA                |
|                                                     | <b>Genotyping method</b>    |                |             |         |                     |                    |              |       |                       |         |                    |                   |
|                                                     | <i>SNPlex technology</i>    | 2              | 1018        | 1020    | <b>2.571</b>        | <b>1.268-5.214</b> | <b>0.009</b> | F     | 0.443                 | 0.506   | 0.0                | NA                |
|                                                     | <i>Other methods</i>        | 3              | 548         | 739     | 1.184               | 0.594-2.360        | 0.631        | F     | 3.452                 | 0.178   | 42.07              | 0.922             |
|                                                     | <b>Source of controls</b>   |                |             |         |                     |                    |              |       |                       |         |                    |                   |
|                                                     | <i>Population-based</i>     | 2              | 373         | 599     | 2.321               | 0.919-5.863        | 0.075        | F     | 0.331                 | 0.565   | 0.0                | NA                |
|                                                     | <i>Hospital-based</i>       | 3              | 1193        | 1160    | 1.332               | 0.427-4.156        | 0.621        | R     | 5.389                 | 0.068   | 62.89              | 0.685             |
|                                                     | <i>HWE in controls</i>      |                |             |         |                     |                    |              |       |                       |         |                    |                   |
|                                                     | <i>Equilibrium</i>          | 4              | 1466        | 1660    | <b>1.800</b>        | <b>1.092-2.966</b> | <b>0.021</b> | F     | 5.205                 | 0.157   | 42.36              | 0.906             |
|                                                     | <i>Disequilibrium</i>       | 1              | 100         | 99      | 0.327               | 0.013-8.117        | 0.495        | F     | 0.0                   | 1.0     | 0.0                | NA                |
|                                                     | <b>Quality score</b>        |                |             |         |                     |                    |              |       |                       |         |                    |                   |
|                                                     | <i>High quality</i>         | 3              | 1113        | 1341    | <b>2.655</b>        | <b>1.442-4.888</b> | <b>0.002</b> | F     | 0.474                 | 0.789   | 0.0                | 0.441             |
|                                                     | <i>Low quality</i>          | 2              | 453         | 418     | 0.767               | 0.331-1.776        | 0.535        | F     | 0.291                 | 0.590   | 0.0                | NA                |
| <b>Dominant model<br/>(CA+AA versus CC)</b>         | <b>Overall</b>              | 5              | 1566        | 1759    | 1.036               | 0.877-1.223        | 0.679        | F     | 5.378                 | 0.251   | 25.63              | 0.879             |
|                                                     | <b>Geographical region</b>  |                |             |         |                     |                    |              |       |                       |         |                    |                   |
|                                                     | <i>Asian</i>                | 1              | 100         | 99      | 0.327               | 0.013-8.117        | 0.495        | F     | 0.0                   | 1.0     | 0.0                | NA                |
|                                                     | <i>European</i>             | 2              | 448         | 640     | 1.167               | 0.607-2.242        | 0.644        | R     | 4.411                 | 0.036   | 77.33              | NA                |
|                                                     | <i>American</i>             | 2              | 1018        | 1020    | 1.030               | 0.840-1.263        | 0.775        | F     | 0.450                 | 0.502   | 0.0                | NA                |
|                                                     | <b>Cancer type</b>          |                |             |         |                     |                    |              |       |                       |         |                    |                   |
|                                                     | <i>Prostate cancer</i>      | 1              | 353         | 319     | 0.859               | 0.607-1.216        | 0.392        | F     | 0.0                   | 1.0     | 0.0                | NA                |
|                                                     | <i>CLL</i>                  | 1              | 95          | 321     | 1.678               | 0.999-2.820        | 0.051        | F     | 0.0                   | 1.0     | 0.0                | NA                |
|                                                     | <i>Lung cancer</i>          | 1              | 100         | 99      | 0.327               | 0.013-8.117        | 0.495        | F     | 0.0                   | 1.0     | 0.0                | NA                |
|                                                     | <i>Bladder cancer</i>       | 1              | 740         | 742     | 0.989               | 0.781-1.253        | 0.928        | F     | 0.0                   | 1.0     | 0.0                | NA                |
|                                                     | <i>Renal cell carcinoma</i> | 1              | 278         | 278     | 1.162               | 0.774-1.743        | 0.469        | F     | 0.0                   | 1.0     | 0.0                | NA                |
|                                                     | <b>Genotyping method</b>    |                |             |         |                     |                    |              |       |                       |         |                    |                   |
|                                                     | <i>SNPlex technology</i>    | 2              | 1018        | 1020    | 1.030               | 0.840-1.263        | 0.775        | F     | 0.450                 | 0.502   | 0.0                | NA                |
|                                                     | <i>Other methods</i>        | 3              | 548         | 739     | 1.114               | 0.612-2.027        | 0.724        | R     | 4.920                 | 0.085   | 59.35              | 0.986             |

|                                      |                      |   |      |      |              |                    |              |   |       |       |       |              |
|--------------------------------------|----------------------|---|------|------|--------------|--------------------|--------------|---|-------|-------|-------|--------------|
|                                      | Source of controls   |   |      |      |              |                    |              |   |       |       |       |              |
|                                      | Population-based     | 2 | 373  | 599  | 1.336        | 0.970-1.839        | 0.076        | F | 1.197 | 0.274 | 16.47 | NA           |
|                                      | Hospital-based       | 3 | 1193 | 1160 | 0.942        | 0.776-1.145        | 0.551        | F | 0.850 | 0.654 | 0.0   | 0.325        |
|                                      | HWE in controls      |   |      |      |              |                    |              |   |       |       |       |              |
|                                      | Equilibrium          | 4 | 1466 | 1660 | 1.039        | 0.880-1.227        | 0.653        | F | 4.881 | 0.181 | 38.54 | 0.309        |
|                                      | Disequilibrium       | 1 | 100  | 99   | 0.327        | 0.013-8.117        | 0.495        | F | 0.0   | 1.0   | 0.0   | NA           |
|                                      | Quality score        |   |      |      |              |                    |              |   |       |       |       |              |
|                                      | High quality         | 3 | 1113 | 1341 | 1.100        | 0.909-1.330        | 0.327        | F | 3.390 | 0.184 | 41.01 | 0.207        |
|                                      | Low quality          | 2 | 453  | 418  | 0.850        | 0.602-1.200        | 0.355        | F | 0.344 | 0.557 | 0.0   | NA           |
|                                      | Overall              | 5 | 1251 | 1397 | <b>1.727</b> | <b>1.052-2.835</b> | <b>0.031</b> | F | 6.596 | 0.159 | 39.36 | 0.668        |
|                                      | Geographical region  |   |      |      |              |                    |              |   |       |       |       |              |
|                                      | Asian                | 1 | 100  | 99   | 0.327        | 0.013-8.117        | 0.495        | F | 0.0   | 1.0   | 0.0   | NA           |
|                                      | European             | 2 | 350  | 507  | 1.487        | 0.380-5.811        | 0.568        | R | 3.341 | 0.068 | 70.07 | NA           |
|                                      | American             | 2 | 801  | 791  | <b>2.541</b> | <b>1.251-5.160</b> | <b>0.010</b> | F | 0.369 | 0.544 | 0.0   | NA           |
|                                      | Cancer type          |   |      |      |              |                    |              |   |       |       |       |              |
| Homozygote model<br>(AA versus CC)   | Prostate cancer      | 1 | 278  | 244  | 0.790        | 0.330-1.894        | 0.598        | F | 0.0   | 1.0   | 0.0   | NA           |
|                                      | CLL                  | 1 | 72   | 263  | 3.197        | 0.947-10.794       | 0.061        | F | 0.0   | 1.0   | 0.0   | NA           |
|                                      | Lung cancer          | 1 | 100  | 99   | 0.327        | 0.013-8.117        | 0.495        | F | 0.0   | 1.0   | 0.0   | NA           |
|                                      | Bladder cancer       | 1 | 581  | 566  | <b>2.875</b> | <b>1.275-6.482</b> | <b>0.011</b> | F | 0.0   | 1.0   | 0.0   | NA           |
|                                      | Renal cell carcinoma | 1 | 220  | 225  | 1.721        | 0.406-7.290        | 0.461        | F | 0.0   | 1.0   | 0.0   | NA           |
|                                      | Genotyping method    |   |      |      |              |                    |              |   |       |       |       |              |
|                                      | SNPlex technology    | 2 | 801  | 791  | <b>2.541</b> | <b>1.251-5.160</b> | <b>0.010</b> | F | 0.369 | 0.544 | 0.0   | NA           |
|                                      | Other methods        | 3 | 450  | 606  | 1.194        | 0.597-2.388        | 0.617        | F | 3.996 | 0.136 | 49.95 | 0.942        |
|                                      | Source of controls   |   |      |      |              |                    |              |   |       |       |       |              |
|                                      | Population-based     | 2 | 292  | 488  | 2.472        | 0.975-6.267        | 0.057        | F | 0.413 | 0.520 | 0.0   | NA           |
|                                      | Hospital-based       | 3 | 959  | 909  | 1.299        | 0.415-4.066        | 0.653        | R | 5.388 | 0.068 | 62.88 | 0.688        |
|                                      | HWE in controls      |   |      |      |              |                    |              |   |       |       |       |              |
|                                      | Equilibrium          | 4 | 1151 | 1298 | <b>1.799</b> | <b>1.090-2.970</b> | <b>0.022</b> | F | 5.539 | 0.136 | 45.84 | 0.855        |
|                                      | Disequilibrium       | 1 | 100  | 99   | 0.327        | 0.013-8.117        | 0.495        | F | 0.0   | 1.0   | 0.0   | NA           |
|                                      | Quality score        |   |      |      |              |                    |              |   |       |       |       |              |
|                                      | High quality         | 3 | 873  | 1054 | <b>2.693</b> | <b>1.460-4.967</b> | <b>0.002</b> | F | 0.471 | 0.790 | 0.0   | 0.588        |
|                                      | Low quality          | 2 | 378  | 343  | 0.744        | 0.320-1.729        | 0.491        | F | 0.270 | 0.603 | 0.0   | NA           |
| Heterozygote model<br>(CA versus CC) | Overall              | 4 | 1423 | 1632 | 0.980        | 0.824-1.165        | 0.819        | F | 3.717 | 0.294 | 19.29 | 0.166        |
|                                      | Geographical region  |   |      |      |              |                    |              |   |       |       |       |              |
|                                      | European             | 2 | 433  | 623  | 1.105        | 0.642-1.901        | 0.719        | R | 2.739 | 0.098 | 63.50 | NA           |
|                                      | American             | 2 | 990  | 1009 | 0.957        | 0.775-1.181        | 0.680        | F | 0.823 | 0.364 | 0.0   | NA           |
|                                      | Cancer type          |   |      |      |              |                    |              |   |       |       |       |              |
|                                      | Prostate cancer      | 1 | 343  | 308  | 0.869        | 0.604-1.252        | 0.452        | F | 0.0   | 1.0   | 0.0   | NA           |
|                                      | CLL                  | 1 | 90   | 315  | 1.521        | 0.875-2.644        | 0.137        | F | 0.0   | 1.0   | 0.0   | NA           |
|                                      | Bladder cancer       | 1 | 717  | 734  | 0.903        | 0.707-1.154        | 0.415        | F | 0.0   | 1.0   | 0.0   | NA           |
|                                      | Renal cell carcinoma | 1 | 273  | 275  | 1.130        | 0.745-1.715        | 0.566        | F | 0.0   | 1.0   | 0.0   | NA           |
|                                      | Genotyping method    |   |      |      |              |                    |              |   |       |       |       |              |
|                                      | SNPlex technology    | 2 | 990  | 1009 | 0.957        | 0.775-1.181        | 0.680        | F | 0.823 | 0.364 | 0.0   | NA           |
|                                      | Other methods        | 2 | 433  | 623  | 1.105        | 0.642-1.901        | 0.719        | R | 2.739 | 0.098 | 63.50 | NA           |
|                                      | Source of controls   |   |      |      |              |                    |              |   |       |       |       |              |
|                                      | Population-based     | 2 | 363  | 590  | 1.259        | 0.902-1.756        | 0.176        | F | 0.708 | 0.400 | 0.0   | NA           |
|                                      | Hospital-based       | 2 | 1060 | 1042 | 0.893        | 0.729-1.094        | 0.274        | F | 0.029 | 0.864 | 0.0   | NA           |
|                                      | HWE in controls      |   |      |      |              |                    |              |   |       |       |       |              |
|                                      | Equilibrium          | 4 | 1423 | 1632 | 0.980        | 0.824-1.165        | 0.819        | F | 3.717 | 0.294 | 19.29 | 0.166        |
|                                      | Quality score        |   |      |      |              |                    |              |   |       |       |       |              |
|                                      | High quality         | 3 | 1080 | 1324 | 1.015        | 0.833-1.236        | 0.885        | F | 3.184 | 0.204 | 37.19 | <b>0.090</b> |
|                                      | Low quality          | 1 | 343  | 308  | 0.869        | 0.604-1.252        | 0.452        | F | 0.0   | 1.0   | 0.0   | NA           |

OR: odds ratio, CI: confidence interval, F: fixed model, R: random model, NA: not appreciable



Supplementary Table S23. Meta-analysis of the association between **GEMIN4 (G > A; rs7813)** variant and cancer risk.

| Comparison                                  | Subgroups            | No. of studies | Sample size |         | Test of association |                    |                   |       | Test of heterogeneity |         |                    | Publication bias  |  |
|---------------------------------------------|----------------------|----------------|-------------|---------|---------------------|--------------------|-------------------|-------|-----------------------|---------|--------------------|-------------------|--|
|                                             |                      |                | Cancer      | Control | OR                  | 95% CI             | P-value           | Model | Q test                | P-value | I <sup>2</sup> (%) | P-value (Egger's) |  |
| Allelic model<br>(A allele versus G allele) | Overall              | 14             | 11294       | 11236   | 0.969               | 0.891-1.053        | 0.455             | R     | 91.23                 | < 0.001 | 85.75              | <b>0.051</b>      |  |
|                                             | Geographical region  |                |             |         |                     |                    |                   |       |                       |         |                    |                   |  |
|                                             | Asian                | 9              | 7506        | 6824    | 1.243               | 0.980-1.578        | 0.073             | R     | 80.64                 | < 0.001 | 90.08              | 0.103             |  |
|                                             | European             | 1              | 710         | 638     | 1.023               | 0.823-1.270        | 0.840             | F     | 0.0                   | 1.0     | 0.0                | NA                |  |
|                                             | American             | 4              | 3078        | 3774    | 0.918               | 0.833-1.013        | 0.089             | F     | 2.985                 | 0.394   | 0.0                | 0.823             |  |
|                                             | Cancer type          |                |             |         |                     |                    |                   |       |                       |         |                    |                   |  |
|                                             | Prostate cancer      | 3              | 2006        | 1266    | 1.768               | 0.829-3.771        | 0.140             | R     | 41.45                 | < 0.001 | 95.17              | 0.209             |  |
|                                             | Lung cancer          | 2              | 1142        | 988     | <b>0.794</b>        | <b>0.663-0.952</b> | <b>0.013</b>      | F     | 2.647                 | 0.104   | 62.23              | NA                |  |
|                                             | Esophageal cancer    | 2              | 1454        | 1544    | 0.979               | 0.844-1.136        | 0.781             | F     | 0.748                 | 0.387   | 0.0                | NA                |  |
|                                             | Breast cancer        | 2              | 2850        | 2902    | 0.974               | 0.874-1.087        | 0.643             | F     | 2.376                 | 0.123   | 57.92              | NA                |  |
|                                             | Renal cell carcinoma | 2              | 754         | 1006    | 1.144               | 0.567-2.311        | 0.707             | R     | 11.16                 | 0.001   | 91.04              | NA                |  |
|                                             | Gastric cancer       | 1              | 1256        | 1004    | <b>1.265</b>        | <b>1.059-1.512</b> | <b>0.010</b>      | F     | 0.0                   | 1.0     | 0.0                | NA                |  |
|                                             | NHL                  | 1              | 360         | 1054    | 1.088               | 0.853-1.388        | 0.498             | F     | 0.0                   | 1.0     | 0.0                | NA                |  |
|                                             | Bladder cancer       | 1              | 1472        | 1472    | 0.908               | 0.785-1.050        | 0.195             | F     | 0.0                   | 1.0     | 0.0                | NA                |  |
|                                             | Genotyping method    |                |             |         |                     |                    |                   |       |                       |         |                    |                   |  |
|                                             | TaqMan PCR           | 5              | 4706        | 4780    | 0.996               | 0.821-1.210        | 0.971             | R     | 18.75                 | 0.001   | 78.66              | 0.492             |  |
|                                             | HRM method           | 3              | 2552        | 1632    | 1.890               | 0.990-3.607        | 0.054             | R     | 33.51                 | < 0.001 | 94.03              | 0.395             |  |
|                                             | SNPlex technology    | 3              | 2718        | 2720    | <b>0.889</b>        | <b>0.799-0.989</b> | <b>0.031</b>      | F     | 0.772                 | 0.680   | 0.0                | 0.540             |  |
|                                             | Other methods        | 3              | 1318        | 2104    | 1.065               | 0.919-1.235        | 0.402             | F     | 0.074                 | 0.964   | 0.0                | 0.594             |  |
|                                             | Source of controls   |                |             |         |                     |                    |                   |       |                       |         |                    |                   |  |
|                                             | Population-based     | 6              | 4654        | 4406    | 1.322               | 0.949-1.841        | 0.099             | R     | 61.91                 | < 0.001 | 91.92              | 0.144             |  |
|                                             | Hospital-based       | 8              | 6640        | 6830    | 0.992               | 0.864-1.138        | 0.907             | R     | 23.43                 | 0.001   | 70.12              | 0.430             |  |
|                                             | HWE in controls      |                |             |         |                     |                    |                   |       |                       |         |                    |                   |  |
|                                             | Equilibrium          | 13             | 10598       | 11096   | 1.014               | 0.916-1.122        | 0.794             | R     | 35.84                 | < 0.001 | 66.52              | 0.266             |  |
|                                             | Disequilibrium       | 1              | 696         | 140     | <b>4.281</b>        | <b>2.927-6.262</b> | <b>&lt; 0.001</b> | F     | 0.0                   | 1.0     | 0.0                | NA                |  |
|                                             | Quality score        |                |             |         |                     |                    |                   |       |                       |         |                    |                   |  |
|                                             | High quality         | 11             | 9692        | 10260   | 1.012               | 0.902-1.135        | 0.846             | R     | 35.59                 | < 0.001 | 71.90              | 0.291             |  |
|                                             | Low quality          | 3              | 1602        | 976     | 1.674               | 0.689-4.063        | 0.255             | R     | 42.66                 | < 0.001 | 95.31              | 0.603             |  |
| Recessive model<br>(AA versus GG+GA)        | Overall              | 14             | 5647        | 5618    | 1.005               | 0.855-1.182        | 0.949             | R     | 64.35                 | < 0.001 | 79.80              | 0.022             |  |
|                                             | Geographical region  |                |             |         |                     |                    |                   |       |                       |         |                    |                   |  |
|                                             | Asian                | 9              | 3753        | 3412    | <b>1.488</b>        | <b>1.030-2.152</b> | <b>0.034</b>      | R     | 48.54                 | < 0.001 | 83.52              | 0.135             |  |
|                                             | European             | 1              | 355         | 319     | 1.121               | 0.742-1.692        | 0.588             | F     | 0.0                   | 1.0     | 0.0                | NA                |  |
|                                             | American             | 4              | 1539        | 1887    | 0.860               | 0.723-1.023        | 0.089             | F     | 3.785                 | 0.286   | 20.73              | 0.237             |  |
|                                             | Cancer type          |                |             |         |                     |                    |                   |       |                       |         |                    |                   |  |
|                                             | Prostate cancer      | 3              | 1003        | 633     | 2.395               | 0.803-7.143        | 0.117             | R     | 33.12                 | < 0.001 | 93.96              | 0.201             |  |
|                                             | Lung cancer          | 2              | 571         | 494     | 0.911               | 0.628-1.322        | 0.625             | F     | 0.0                   | 0.988   | 0.0                | NA                |  |
|                                             | Esophageal cancer    | 2              | 727         | 772     | 0.957               | 0.710-1.288        | 0.770             | F     | 0.767                 | 0.381   | 0.0                | NA                |  |
|                                             | Breast cancer        | 2              | 1425        | 1451    | 1.059               | 0.701-1.599        | 0.785             | R     | 3.274                 | 0.070   | 69.46              | NA                |  |
|                                             | Renal cell carcinoma | 2              | 377         | 503     | 1.382               | 0.489-3.904        | 0.542             | R     | 7.051                 | 0.008   | 85.82              | NA                |  |
|                                             | Gastric cancer       | 1              | 628         | 502     | <b>1.562</b>        | <b>1.039-2.348</b> | <b>0.032</b>      | F     | 0.0                   | 1.0     | 0.0                | NA                |  |
|                                             | NHL                  | 1              | 180         | 527     | 1.255               | 0.812-1.941        | 0.307             | F     | 0.0                   | 1.0     | 0.0                | NA                |  |
|                                             | Bladder cancer       | 1              | 736         | 736     | <b>0.760</b>        | <b>0.588-0.983</b> | <b>0.037</b>      | F     | 0.0                   | 1.0     | 0.0                | NA                |  |
|                                             | Genotyping method    |                |             |         |                     |                    |                   |       |                       |         |                    |                   |  |
|                                             | TaqMan PCR           | 5              | 2353        | 2390    | 1.146               | 0.867-1.515        | 0.339             | R     | 9.606                 | 0.048   | 58.36              | 0.303             |  |
|                                             | HRM method           | 3              | 1276        | 816     | 2.667               | 0.948-7.504        | 0.063             | R     | 29.87                 | < 0.001 | 93.30              | <b>0.052</b>      |  |
|                                             | SNPlex technology    | 3              | 1359        | 1360    | <b>0.800</b>        | <b>0.662-0.968</b> | <b>0.021</b>      | F     | 0.347                 | 0.841   | 0.0                | 0.203             |  |
|                                             | Other methods        | 3              | 659         | 1052    | 1.159               | 0.857-1.568        | 0.338             | F     | 0.418                 | 0.812   | 0.0                | 0.233             |  |
|                                             | Source of controls   |                |             |         |                     |                    |                   |       |                       |         |                    |                   |  |
|                                             | Population-based     | 6              | 2327        | 2203    | 1.732               | 0.996-3.012        | 0.052             | R     | 42.57                 | < 0.001 | 88.25              | 0.111             |  |
|                                             | Hospital-based       | 8              | 3320        | 3415    | 1.001               | 0.831-1.206        | 0.993             | R     | 12.92                 | 0.074   | 45.82              | 0.331             |  |
|                                             | HWE in controls      |                |             |         |                     |                    |                   |       |                       |         |                    |                   |  |
|                                             | Equilibrium          | 13             | 5299        | 5548    | 1.071               | 0.916-1.252        | 0.390             | R     | 23.44                 | 0.024   | 48.81              | 0.128             |  |
|                                             | Disequilibrium       | 1              | 348         | 70      | <b>11.65</b>        | <b>5.597-24.25</b> | <b>&lt; 0.001</b> | F     | 0.0                   | 1.0     | 0.0                | NA                |  |
|                                             | Quality score        |                |             |         |                     |                    |                   |       |                       |         |                    |                   |  |
|                                             | High quality         | 11             | 4846        | 5130    | 1.076               | 0.902-1.284        | 0.413             | R     | 23.23                 | 0.010   | 56.95              | <b>0.049</b>      |  |
|                                             | Low quality          | 3              | 801         | 488     | 2.279               | 0.497-10.46        | 0.289             | R     | 32.31                 | < 0.001 | 93.81              | 0.699             |  |
| Dominant model<br>(GA+AA versus GG)         | Overall              | 14             | 5647        | 5618    | 0.979               | 0.868-1.104        | 0.727             | R     | 49.62                 | < 0.001 | 73.80              | <b>0.055</b>      |  |
|                                             | Geographical region  |                |             |         |                     |                    |                   |       |                       |         |                    |                   |  |
|                                             | Asian                | 9              | 3753        | 3412    | 1.193               | 0.915-1.555        | 0.192             | R     | 45.51                 | < 0.001 | 82.42              | <b>0.066</b>      |  |
|                                             | European             | 1              | 355         | 319     | 0.979               | 0.708-1.355        | 0.900             | F     | 0.0                   | 1.0     | 0.0                | NA                |  |
|                                             | American             | 4              | 1539        | 1887    | 0.920               | 0.794-1.067        | 0.271             | F     | 2.998                 | 0.392   | 0.0                | 0.484             |  |
|                                             | Cancer type          |                |             |         |                     |                    |                   |       |                       |         |                    |                   |  |
|                                             | Prostate cancer      | 3              | 1003        | 633     | 2.328               | 0.765-7.081        | 0.137             | R     | 17.22                 | < 0.001 | 88.38              | 0.163             |  |
|                                             | Lung cancer          | 2              | 571         | 494     | 0.815               | 0.416-1.595        | 0.550             | R     | 4.722                 | 0.030   | 78.82              | NA                |  |
|                                             | Esophageal cancer    | 2              | 727         | 772     | 0.980               | 0.794-1.210        | 0.853             | F     | 0.358                 | 0.550   | 0.0                | NA                |  |
|                                             | Breast cancer        | 2              | 1425        | 1451    | 0.928               | 0.801-1.075        | 0.318             | F     | 0.953                 | 0.329   | 0.0                | NA                |  |
|                                             | Renal cell carcinoma | 2              | 377         | 503     | 1.051               | 0.456-2.425        | 0.906             | R     | 7.745                 | 0.005   | 87.09              | NA                |  |
|                                             | Gastric cancer       | 1              | 628         | 502     | <b>1.298</b>        | <b>1.025-1.644</b> | <b>0.030</b>      | F     | 0.0                   | 1.0     | 0.0                | NA                |  |
|                                             | NHL                  | 1              | 180         | 527     | 1.032               | 0.727-1.463        | 0.862             | F     | 0.0                   | 1.0     | 0.0                | NA                |  |

|                                      |                       |    |      |      |              |                    |                   |   |       |         |       |               |
|--------------------------------------|-----------------------|----|------|------|--------------|--------------------|-------------------|---|-------|---------|-------|---------------|
|                                      | <i>Bladder cancer</i> | 1  | 736  | 736  | 0.981        | 0.785-1.225        | 0.865             | F | 0.0   | 1.0     | 0.0   | NA            |
|                                      | Genotyping method     |    |      |      |              |                    |                   |   |       |         |       |               |
|                                      | TaqMan PCR            | 5  | 2353 | 2390 | 0.919        | 0.719-1.175        | 0.501             | R | 15.66 | 0.004   | 74.46 | 0.607         |
|                                      | HRM method            | 3  | 1276 | 816  | <b>2.512</b> | <b>1.001-6.308</b> | <b>0.050</b>      | R | 12.70 | 0.002   | 84.25 | 0.222         |
|                                      | SNPlex technology     | 3  | 1359 | 1360 | 0.898        | 0.763-1.057        | 0.195             | F | 2.500 | 0.287   | 19.99 | 0.332         |
|                                      | Other methods         | 3  | 659  | 1052 | 1.055        | 0.861-1.293        | 0.603             | F | 0.247 | 0.884   | 0.0   | 0.254         |
|                                      | Source of controls    |    |      |      |              |                    |                   |   |       |         |       |               |
|                                      | Population-based      | 6  | 2327 | 2203 | 1.166        | 0.856-1.589        | 0.331             | R | 23.92 | < 0.001 | 79.10 | 0.143         |
|                                      | Hospital-based        | 8  | 3320 | 3415 | 0.992        | 0.803-1.225        | 0.939             | R | 25.02 | 0.001   | 72.03 | 0.363         |
|                                      | HWE in controls       |    |      |      |              |                    |                   |   |       |         |       |               |
|                                      | Equilibrium           | 13 | 5299 | 5548 | 0.989        | 0.858-1.139        | 0.873             | R | 33.10 | 0.001   | 63.75 | 0.282         |
|                                      | Disequilibrium        | 1  | 348  | 70   | <b>6.302</b> | <b>2.562-15.50</b> | <b>&lt; 0.001</b> | F | 0.0   | 1.0     | 0.0   | NA            |
|                                      | Quality score         |    |      |      |              |                    |                   |   |       |         |       |               |
|                                      | High quality          | 11 | 4846 | 5130 | 0.983        | 0.837-1.153        | 0.830             | R | 32.50 | < 0.001 | 69.23 | 0.374         |
|                                      | Low quality           | 3  | 801  | 488  | 1.771        | 0.740-4.235        | 0.199             | F | 0.0   | 1.0     | 0.0   | NA            |
| Homozygote model<br>(AA versus GG)   | Overall               | 14 | 3142 | 3005 | 0.967        | 0.810-1.155        | 0.714             | R | 66.87 | < 0.001 | 80.56 | <b>0.012</b>  |
|                                      | Geographical region   |    |      |      |              |                    |                   |   |       |         |       |               |
|                                      | Asian                 | 9  | 2189 | 1876 | <b>1.646</b> | <b>1.043-2.595</b> | <b>0.032</b>      | R | 54.38 | < 0.001 | 85.29 | <b>0.053*</b> |
|                                      | European              | 1  | 174  | 150  | 1.085        | 0.683-1.723        | 0.730             | F | 0.0   | 1.0     | 0.0   | NA            |
|                                      | American              | 4  | 779  | 979  | 0.839        | 0.688-1.023        | 0.083             | F | 3.340 | 0.342   | 10.18 | 0.679         |
|                                      | Cancer type           |    |      |      |              |                    |                   |   |       |         |       |               |
|                                      | Prostate cancer       | 3  | 606  | 333  | 3.940        | 0.753-20.63        | 0.105             | R | 29.04 | < 0.001 | 93.11 | 0.203         |
|                                      | Lung cancer           | 2  | 349  | 261  | 0.748        | 0.505-1.110        | 0.149             | F | 0.556 | 0.456   | 0.0   | NA            |
|                                      | Esophageal cancer     | 2  | 374  | 398  | 0.951        | 0.685-1.320        | 0.764             | F | 0.883 | 0.347   | 0.0   | NA            |
|                                      | Breast cancer         | 2  | 815  | 793  | 1.004        | 0.639-1.575        | 0.987             | R | 3.474 | 0.062   | 71.21 | NA            |
|                                      | Renal cell carcinoma  | 2  | 207  | 271  | 1.344        | 0.334-5.414        | 0.677             | R | 10.56 | 0.001   | 90.53 | NA            |
|                                      | Gastric cancer        | 1  | 334  | 280  | <b>1.728</b> | <b>1.128-2.647</b> | <b>0.012</b>      | F | 0.0   | 1.0     | 0.0   | NA            |
|                                      | NHL                   | 1  | 102  | 285  | 1.229        | 0.760-1.989        | 0.401             | F | 0.0   | 1.0     | 0.0   | NA            |
|                                      | Bladder cancer        | 1  | 355  | 384  | 0.792        | 0.589-1.065        | 0.122             | F | 0.0   | 1.0     | 0.0   | NA            |
|                                      | Genotyping method     |    |      |      |              |                    |                   |   |       |         |       |               |
|                                      | TaqMan PCR            | 5  | 1344 | 1281 | 1.089        | 0.756-1.569        | 0.647             | R | 14.24 | 0.007   | 71.90 | 0.389         |
|                                      | HRM method            | 3  | 766  | 463  | 4.535        | 1.124-18.30        | 0.034             | R | 21.29 | < 0.001 | 90.60 | 0.320         |
|                                      | SNPlex technology     | 3  | 677  | 694  | <b>0.776</b> | <b>0.624-0.965</b> | <b>0.022</b>      | F | 0.423 | 0.809   | 0.0   | 0.680         |
|                                      | Other methods         | 3  | 355  | 567  | 1.165        | 0.842-1.612        | 0.357             | F | 0.128 | 0.938   | 0.0   | 0.355         |
|                                      | Source of controls    |    |      |      |              |                    |                   |   |       |         |       |               |
|                                      | Population-based      | 6  | 1306 | 1145 | 1.786        | 0.960-3.322        | 0.067             | R | 42.42 | < 0.001 | 88.21 | <b>0.091</b>  |
|                                      | Hospital-based        | 8  | 1836 | 1860 | 1.023        | 0.780-1.342        | 0.867             | R | 19.28 | 0.007   | 63.70 | 0.173         |
|                                      | HWE in controls       |    |      |      |              |                    |                   |   |       |         |       |               |
|                                      | Equilibrium           | 13 | 2912 | 2985 | 1.080        | 0.874-1.333        | 0.476             | R | 32.41 | 0.001   | 62.97 | 0.105         |
|                                      | Disequilibrium        | 1  | 230  | 20   | <b>26.89</b> | <b>9.084-79.59</b> | <b>&lt; 0.001</b> | F | 0.0   | 1.0     | 0.0   | NA            |
|                                      | Quality score         |    |      |      |              |                    |                   |   |       |         |       |               |
|                                      | High quality          | 11 | 2685 | 2776 | 1.089        | 0.856-1.383        | 0.488             | R | 32.33 | < 0.001 | 69.07 | <b>0.077</b>  |
|                                      | Low quality           | 3  | 457  | 229  | 2.959        | 0.498-17.57        | 0.233             | R | 29.58 | < 0.001 | 93.24 | 0.503         |
| Heterozygote model<br>(GA versus GG) | Overall               | 14 | 4527 | 4714 | 0.981        | 0.867-1.110        | 0.757             | R | 31.10 | 0.003   | 58.20 | 0.131         |
|                                      | Geographical region   |    |      |      |              |                    |                   |   |       |         |       |               |
|                                      | Asian                 | 9  | 2972 | 2934 | 1.056        | 0.847-1.316        | 0.631             | R | 27.80 | 0.001   | 71.22 | 0.110         |
|                                      | European              | 1  | 295  | 270  | 0.949        | 0.675-1.333        | 0.762             | F | 0.0   | 1.0     | 0.0   | NA            |
|                                      | American              | 4  | 1260 | 1510 | 0.953        | 0.814-1.115        | 0.546             | F | 3.271 | 0.352   | 8.293 | 0.217         |
|                                      | Cancer type           |    |      |      |              |                    |                   |   |       |         |       |               |
|                                      | Prostate cancer       | 3  | 531  | 431  | 1.623        | 0.781-3.373        | 0.195             | R | 6.950 | 0.031   | 71.22 | 0.020         |
|                                      | Lung cancer           | 2  | 506  | 433  | 0.816        | 0.384-1.736        | 0.598             | R | 5.282 | 0.022   | 81.07 | NA            |
|                                      | Esophageal cancer     | 2  | 628  | 665  | 0.985        | 0.790-1.229        | 0.896             | F | 0.111 | 0.739   | 0.0   | NA            |
|                                      | Breast cancer         | 2  | 1251 | 1284 | 0.904        | 0.774-1.057        | 0.206             | F | 0.202 | 0.653   | 0.0   | NA            |
|                                      | Renal cell carcinoma  | 2  | 305  | 422  | 0.955        | 0.503-1.814        | 0.889             | R | 3.970 | 0.046   | 74.81 | NA            |
|                                      | Gastric cancer        | 1  | 555  | 463  | 1.223        | 0.955-1.566        | 0.110             | F | 0.0   | 1.0     | 0.0   | NA            |
|                                      | NHL                   | 1  | 145  | 442  | 0.962        | 0.660-1.402        | 0.841             | F | 0.0   | 1.0     | 0.0   | NA            |
|                                      | Bladder cancer        | 1  | 606  | 574  | 1.068        | 0.844-1.351        | 0.584             | F | 0.0   | 1.0     | 0.0   | NA            |
|                                      | Genotyping method     |    |      |      |              |                    |                   |   |       |         |       |               |
|                                      | TaqMan PCR            | 5  | 2045 | 2104 | 0.868        | 0.697-1.082        | 0.209             | R | 11.14 | 0.025   | 64.08 | 0.708         |
|                                      | HRM method            | 3  | 791  | 624  | <b>1.346</b> | <b>1.071-1.693</b> | <b>0.011</b>      | F | 4.181 | 0.124   | 52.17 | <b>0.006*</b> |
|                                      | SNPlex technology     | 3  | 1115 | 1068 | 0.951        | 0.800-1.130        | 0.568             | F | 3.268 | 0.195   | 38.80 | 0.271         |
|                                      | Other methods         | 3  | 576  | 918  | 1.027        | 0.829-1.273        | 0.807             | F | 0.569 | 0.753   | 0.0   | 0.452         |
|                                      | Source of controls    |    |      |      |              |                    |                   |   |       |         |       |               |
|                                      | Population-based      | 6  | 1840 | 1948 | 0.963        | 0.844-1.098        | 0.570             | F | 8.971 | 0.110   | 44.27 | 0.202         |
|                                      | Hospital-based        | 8  | 2687 | 2766 | 0.986        | 0.799-1.218        | 0.899             | R | 22.13 | 0.002   | 68.36 | 0.437         |
|                                      | HWE in controls       |    |      |      |              |                    |                   |   |       |         |       |               |
|                                      | Equilibrium           | 13 | 4399 | 4653 | 0.964        | 0.843-1.103        | 0.596             | R | 26.56 | 0.009   | 54.82 | 0.339         |
|                                      | Disequilibrium        | 1  | 128  | 61   | <b>2.596</b> | <b>1.037-6.501</b> | <b>0.042</b>      | F | 0.0   | 1.0     | 0.0   | NA            |
|                                      | Quality score         |    |      |      |              |                    |                   |   |       |         |       |               |
|                                      | High quality          | 11 | 4017 | 4296 | 0.956        | 0.823-1.112        | 0.563             | R | 25.71 | 0.004   | 61.10 | 0.477         |

|  |                    |   |     |     |       |             |       |   |       |       |       |       |
|--|--------------------|---|-----|-----|-------|-------------|-------|---|-------|-------|-------|-------|
|  | <i>Low quality</i> | 3 | 510 | 418 | 1.111 | 0.838-1.471 | 0.464 | F | 4.279 | 0.118 | 53.26 | 0.132 |
|--|--------------------|---|-----|-----|-------|-------------|-------|---|-------|-------|-------|-------|

OR: odds ratio, CI: confidence interval, F: fixed model, R: random model, NA: not appreciable

Supplementary Table S24. Meta-analysis of the association between **GEMIN4 (G > C; rs2740348)** variant and cancer risk.

| Comparison                                          | Subgroups                   | No. of studies | Sample size |         | Test of association |                    |              |       | Test of heterogeneity |         |                    | Publication bias  |
|-----------------------------------------------------|-----------------------------|----------------|-------------|---------|---------------------|--------------------|--------------|-------|-----------------------|---------|--------------------|-------------------|
|                                                     |                             |                | Cancer      | Control | OR                  | 95% CI             | P-value      | Model | Q test                | P-value | I <sup>2</sup> (%) | P-value (Egger's) |
| <b>Allelic model<br/>(C allele versus G allele)</b> | <b>Overall</b>              | 11             | 9484        | 10918   | 0.919               | 0.824-1.025        | 0.128        | R     | 17.336                | 0.067   | 42.32              | 0.982             |
|                                                     | <b>Geographical region</b>  |                |             |         |                     |                    |              |       |                       |         |                    |                   |
|                                                     | <i>Asian</i>                | 3              | 2510        | 2444    | 0.907               | 0.763-1.078        | 0.268        | F     | 2.715                 | 0.257   | 26.33              | 0.635             |
|                                                     | <i>European</i>             | 2              | 1040        | 1408    | 1.162               | 0.930-1.453        | 0.186        | F     | 2.025                 | 0.155   | 50.61              | NA                |
|                                                     | <i>American</i>             | 5              | 5310        | 6128    | <b>0.873</b>        | <b>0.791-0.963</b> | <b>0.007</b> | F     | 7.252                 | 0.123   | 44.85              | 0.606             |
|                                                     | <i>Mexican</i>              | 1              | 624         | 938     | 0.932               | 0.724-1.201        | 0.586        | F     | 0.0                   | 1.0     | 0.0                | NA                |
|                                                     | <b>Cancer type</b>          |                |             |         |                     |                    |              |       |                       |         |                    |                   |
|                                                     | <i>Breast cancer</i>        | 2              | 2556        | 2494    | 1.082               | 0.925-1.266        | 0.323        | F     | 2.350                 | 0.125   | 57.45              | NA                |
|                                                     | <i>Bladder cancer</i>       | 1              | 1476        | 1478    | 0.896               | 0.742-1.082        | 0.255        | F     | 0.0                   | 1.0     | 0.0                | NA                |
|                                                     | <i>CML</i>                  | 1              | 624         | 938     | 0.835               | 0.503-1.387        | 0.487        | F     | 0.0                   | 1.0     | 0.0                | NA                |
|                                                     | <i>CLL</i>                  | 1              | 210         | 690     | 0.932               | 0.724-1.201        | 0.586        | F     | 0.0                   | 1.0     | 0.0                | NA                |
|                                                     | <i>Colon cancer</i>         | 1              | 2230        | 2346    | 0.824               | 0.706-0.962        | 0.014        | F     | 0.0                   | 1.0     | 0.0                | NA                |
|                                                     | <i>Esophageal cancer</i>    | 1              | 692         | 692     | 1.000               | 0.756-1.323        | 1.0          | F     | 0.0                   | 1.0     | 0.0                | NA                |
|                                                     | <i>Lung cancer</i>          | 1              | 184         | 180     | 0.919               | 0.465-1.814        | 0.807        | F     | 0.0                   | 1.0     | 0.0                | NA                |
|                                                     | <i>NHL</i>                  | 1              | 360         | 1056    | 1.148               | 0.838-1.573        | 0.389        | F     | 0.0                   | 1.0     | 0.0                | NA                |
|                                                     | <i>Prostate cancer</i>      | 1              | 600         | 488     | 0.680               | 0.462-1.000        | 0.050        | F     | 0.0                   | 1.0     | 0.0                | NA                |
|                                                     | <i>Renal cell carcinoma</i> | 1              | 552         | 556     | <b>0.676</b>        | <b>0.501-0.911</b> | <b>0.010</b> | F     | 0.0                   | 1.0     | 0.0                | NA                |
|                                                     | <b>Genotyping method</b>    |                |             |         |                     |                    |              |       |                       |         |                    |                   |
|                                                     | <i>TaqMan</i>               | 4              | 3390        | 4122    | 1.024               | 0.900-1.165        | 0.719        | F     | 3.978                 | 0.264   | 24.59              | 0.720             |
|                                                     | <i>HRM method</i>           | 1              | 600         | 488     | 0.680               | 0.462-1.000        | 0.050        | F     | 0.0                   | 1.0     | 0.0                | NA                |
|                                                     | <i>SNPlex technology</i>    | 3              | 2720        | 2726    | <b>0.866</b>        | <b>0.756-0.995</b> | <b>0.042</b> | F     | 3.790                 | 0.150   | 47.23              | 0.748             |
|                                                     | <i>Other methods</i>        | 3              | 2774        | 3582    | 0.881               | 0.768-1.009        | 0.067        | F     | 3.456                 | 0.178   | 42.13              | 0.595             |
|                                                     | <b>Source of controls</b>   |                |             |         |                     |                    |              |       |                       |         |                    |                   |
|                                                     | <i>Population-based</i>     | 5              | 5548        | 6086    | 0.907               | 0.744-1.104        | 0.330        | R     | 12.54                 | 0.014   | 68.09              | 0.980             |
|                                                     | <i>Hospital-based</i>       | 6              | 3936        | 4832    | 0.929               | 0.828-1.042        | 0.210        | F     | 4.668                 | 0.458   | 0.0                | 0.888             |
|                                                     | <b>HWE in controls</b>      |                |             |         |                     |                    |              |       |                       |         |                    |                   |
|                                                     | <i>Equilibrium</i>          | 10             | 8884        | 10430   | 0.936               | 0.841-1.041        | 0.224        | R     | 14.98                 | 0.092   | 39.90              | 0.675             |
|                                                     | <i>Disequilibrium</i>       | 1              | 600         | 488     | 0.680               | 0.462-1.000        | 0.050        | F     | 0.0                   | 1.0     | 0.0                | NA                |
|                                                     | <b>Quality score</b>        |                |             |         |                     |                    |              |       |                       |         |                    |                   |
|                                                     | <i>High quality</i>         | 8              | 7870        | 9532    | <b>0.895</b>        | <b>0.824-0.972</b> | <b>0.008</b> | F     | 8.457                 | 0.294   | 17.23              | 0.713             |
|                                                     | <i>Low quality</i>          | 3              | 1614        | 1386    | 0.943               | 0.606-1.465        | 0.793        | R     | 7.054                 | 0.029   | 71.65              | 0.594             |
| <b>Recessive model<br/>(CC versus GG+GC)</b>        | <b>Overall</b>              | 9              | 4350        | 5125    | 0.879               | 0.688-1.123        | 0.301        | F     | 5.211                 | 0.735   | 0.0                | 0.653             |
|                                                     | <b>Geographical region</b>  |                |             |         |                     |                    |              |       |                       |         |                    |                   |
|                                                     | <i>Asian</i>                | 1              | 863         | 888     | 0.890               | 0.421-1.882        | 0.761        | F     | 0.0                   | 1.0     | 0.0                | NA                |
|                                                     | <i>European</i>             | 2              | 520         | 704     | 0.845               | 0.413-1.727        | 0.644        | F     | 0.125                 | 0.724   | 0.0                | NA                |
|                                                     | <i>American</i>             | 5              | 2655        | 3064    | 0.816               | 0.605-1.102        | 0.185        | F     | 3.229                 | 0.520   | 0.0                | 0.933             |
|                                                     | <i>Mexican</i>              | 1              | 312         | 469     | 1.422               | 0.676-2.989        | 0.353        | F     | 0.0                   | 1.0     | 0.0                | NA                |
|                                                     | <b>Cancer type</b>          |                |             |         |                     |                    |              |       |                       |         |                    |                   |
|                                                     | <i>Breast cancer</i>        | 2              | 1278        | 1247    | 0.843               | 0.488-1.455        | 0.540        | F     | 0.043                 | 0.835   | 0.0                | NA                |
|                                                     | <i>Bladder cancer</i>       | 1              | 738         | 739     | 0.755               | 0.412-1.383        | 0.362        | F     | 0.0                   | 1.0     | 0.0                | NA                |
|                                                     | <i>CML</i>                  | 1              | 312         | 469     | 1.422               | 0.676-2.989        | 0.353        | F     | 0.0                   | 1.0     | 0.0                | NA                |
|                                                     | <i>CLL</i>                  | 1              | 105         | 345     | 1.097               | 0.218-5.518        | 0.910        | F     | 0.0                   | 1.0     | 0.0                | NA                |
|                                                     | <i>Colon cancer</i>         | 1              | 1115        | 1173    | 0.832               | 0.515-1.342        | 0.450        | F     | 0.0                   | 1.0     | 0.0                | NA                |
|                                                     | <i>Esophageal cancer</i>    | 1              | 346         | 346     | 1.000               | 0.411-2.434        | 1.000        | F     | 0.0                   | 1.0     | 0.0                | NA                |
|                                                     | <i>NHL</i>                  | 1              | 180         | 528     | 1.318               | 0.563-3.085        | 0.525        | F     | 0.0                   | 1.0     | 0.0                | NA                |
|                                                     | <i>Renal cell carcinoma</i> | 1              | 276         | 278     | 0.458               | 0.194-1.080        | 0.075        | F     | 0.0                   | 1.0     | 0.0                | NA                |
|                                                     | <b>Genotyping method</b>    |                |             |         |                     |                    |              |       |                       |         |                    |                   |
|                                                     | <i>TaqMan</i>               | 4              | 1695        | 2061    | 1.018               | 0.666-1.557        | 0.934        | F     | 1.288                 | 0.732   | 0.0                | 0.993             |
|                                                     | <i>SNPlex technology</i>    | 3              | 1360        | 1363    | 0.711               | 0.461-1.095        | 0.121        | F     | 1.610                 | 0.447   | 0.0                | 0.912             |
|                                                     | <i>Other methods</i>        | 2              | 1295        | 1701    | 0.929               | 0.612-1.410        | 0.729        | F     | 0.855                 | 0.355   | 0.0                | NA                |
|                                                     | <b>Source of controls</b>   |                |             |         |                     |                    |              |       |                       |         |                    |                   |
|                                                     | <i>Population-based</i>     | 5              | 2774        | 3043    | 0.776               | 0.560-1.074        | 0.126        | F     | 1.837                 | 0.766   | 0.0                | 0.897             |

|                                     |                             |    |      |      |              |                    |              |   |       |       |       |       |
|-------------------------------------|-----------------------------|----|------|------|--------------|--------------------|--------------|---|-------|-------|-------|-------|
|                                     | <i>Hospital-based</i>       | 4  | 1576 | 2082 | 1.036        | 0.713-1.504        | 0.854        | F | 2.063 | 0.559 | 0.0   | 0.343 |
|                                     | HWE in controls             |    |      |      |              |                    |              |   |       |       |       |       |
|                                     | <i>Equilibrium</i>          | 9  | 4350 | 5125 | 0.879        | 0.688-1.123        | 0.301        | F | 5.211 | 0.735 | 0.0   | 0.653 |
|                                     | Quality score               |    |      |      |              |                    |              |   |       |       |       |       |
|                                     | <i>High quality</i>         | 8  | 3935 | 4766 | 0.888        | 0.687-1.149        | 0.367        | F | 5.140 | 0.643 | 0.0   | 0.644 |
|                                     | <i>Low quality</i>          | 1  | 415  | 359  | 0.793        | 0.357-1.760        | 0.568        | F | 0.0   | 1.0   | 0.0   | NA    |
| Dominant model<br>(GC+CC versus GG) | Overall                     | 11 | 4742 | 5459 | 0.909        | 0.798-1.036        | 0.154        | R | 19.48 | 0.035 | 48.67 | 0.973 |
|                                     | Geographical region         |    |      |      |              |                    |              |   |       |       |       |       |
|                                     | <i>Asian</i>                | 3  | 1255 | 1222 | 0.897        | 0.742-1.083        | 0.257        | F | 3.167 | 0.205 | 36.86 | 0.641 |
|                                     | <i>European</i>             | 2  | 520  | 704  | 1.118        | 0.639-1.956        | 0.695        | R | 3.242 | 0.072 | 69.15 | NA    |
|                                     | <i>American</i>             | 5  | 2655 | 3064 | <b>0.859</b> | <b>0.767-0.962</b> | <b>0.009</b> | F | 6.093 | 0.192 | 34.36 | 0.543 |
|                                     | <i>Mexican</i>              | 1  | 312  | 469  | 0.858        | 0.636-1.156        | 0.314        | F | 0.0   | 1.0   | 0.0   | NA    |
|                                     | Cancer type                 |    |      |      |              |                    |              |   |       |       |       |       |
|                                     | <i>Breast cancer</i>        | 2  | 1278 | 1247 | 1.168        | 0.817-1.669        | 0.394        | R | 3.783 | 0.052 | 73.57 | NA    |
|                                     | <i>Bladder cancer</i>       | 1  | 738  | 739  | 0.897        | 0.721-1.115        | 0.326        | F | 0.0   | 1.0   | 0.0   | NA    |
|                                     | <i>CML</i>                  | 1  | 312  | 469  | 0.858        | 0.636-1.156        | 0.314        | F | 0.0   | 1.0   | 0.0   | NA    |
|                                     | <i>CLL</i>                  | 1  | 105  | 345  | 0.795        | 0.455-1.391        | 0.422        | F | 0.0   | 1.0   | 0.0   | NA    |
|                                     | <i>Colon cancer</i>         | 1  | 1115 | 1173 | <b>0.794</b> | <b>0.665-0.949</b> | <b>0.011</b> | F | 0.0   | 1.0   | 0.0   | NA    |
|                                     | <i>Esophageal cancer</i>    | 1  | 346  | 346  | 1.000        | 0.725-1.379        | 1.000        | F | 0.0   | 1.0   | 0.0   | NA    |
|                                     | <i>Lung cancer</i>          | 1  | 92   | 90   | 0.909        | 0.441-1.872        | 0.792        | F | 0.0   | 1.0   | 0.0   | NA    |
|                                     | <i>NHL</i>                  | 1  | 180  | 528  | 1.146        | 0.795-1.653        | 0.465        | F | 0.0   | 1.0   | 0.0   | NA    |
|                                     | <i>Prostate cancer</i>      | 1  | 300  | 244  | <b>0.644</b> | <b>0.427-0.973</b> | <b>0.037</b> | F | 0.0   | 1.0   | 0.0   | NA    |
|                                     | <i>Renal cell carcinoma</i> | 1  | 276  | 278  | <b>0.668</b> | <b>0.470-0.950</b> | <b>0.025</b> | F | 0.0   | 1.0   | 0.0   | NA    |
|                                     | Genotyping method           |    |      |      |              |                    |              |   |       |       |       |       |
|                                     | <i>TaqMan</i>               | 4  | 1695 | 2061 | 1.020        | 0.801-1.297        | 0.875        | R | 7.029 | 0.071 | 57.32 | 0.780 |
|                                     | <i>HRM method</i>           | 1  | 300  | 244  | <b>0.644</b> | <b>0.427-0.973</b> | <b>0.037</b> | F | 0.0   | 1.0   | 0.0   | NA    |
|                                     | <i>SNPlex technology</i>    | 3  | 1360 | 1363 | 0.867        | 0.738-1.017        | 0.080        | F | 2.958 | 0.228 | 32.38 | 0.721 |
|                                     | <i>Other methods</i>        | 3  | 1387 | 1791 | <b>0.855</b> | <b>0.731-0.999</b> | <b>0.049</b> | F | 3.144 | 0.208 | 36.39 | 0.561 |
|                                     | Source of controls          |    |      |      |              |                    |              |   |       |       |       |       |
|                                     | <i>Population-based</i>     | 5  | 2774 | 3043 | 0.914        | 0.716-1.167        | 0.471        | R | 14.77 | 0.005 | 72.92 | 0.917 |
|                                     | <i>Hospital-based</i>       | 6  | 1968 | 2416 | 0.904        | 0.792-1.032        | 0.135        | F | 4.712 | 0.452 | 0.0   | 0.885 |
|                                     | HWE in controls             |    |      |      |              |                    |              |   |       |       |       |       |
|                                     | <i>Equilibrium</i>          | 10 | 4442 | 5215 | 0.932        | 0.818-1.062        | 0.290        | R | 16.76 | 0.053 | 46.29 | 0.694 |
|                                     | <i>Disequilibrium</i>       | 1  | 300  | 244  | <b>0.644</b> | <b>0.427-0.973</b> | <b>0.037</b> | F | 0.0   | 1.0   | 0.0   | NA    |
|                                     | Quality score               |    |      |      |              |                    |              |   |       |       |       |       |
|                                     | <i>High quality</i>         | 8  | 3935 | 4766 | 0.879        | 0.800-0.966        | 0.007        | F | 7.417 | 0.387 | 5.616 | 0.794 |
|                                     | <i>Low quality</i>          | 3  | 807  | 693  | 0.958        | 0.546-1.682        | 0.881        | R | 9.597 | 0.008 | 79.16 | 0.629 |
| Homozygote model<br>(CC versus GG)  | Overall                     | 9  | 3171 | 3692 | 0.858        | 0.671-1.099        | 0.225        | F | 5.771 | 0.673 | 0.0   | 0.570 |
|                                     | Geographical region         |    |      |      |              |                    |              |   |       |       |       |       |
|                                     | <i>Asian</i>                | 1  | 678  | 697  | 0.889        | 0.420-1.882        | 0.758        | F | 0.0   | 1.0   | 0.0   | NA    |
|                                     | <i>European</i>             | 2  | 341  | 527  | 0.937        | 0.456-1.926        | 0.859        | F | 0.022 | 0.881 | 0.0   | NA    |
|                                     | <i>American</i>             | 5  | 1934 | 2163 | 0.783        | 0.579-1.060        | 0.113        | F | 4.035 | 0.401 | 0.877 | 0.878 |
|                                     | <i>Mexican</i>              | 1  | 218  | 305  | 1.327        | 0.627-2.809        | 0.460        | F | 0.0   | 1.0   | 0.0   | NA    |
|                                     | Cancer type                 |    |      |      |              |                    |              |   |       |       |       |       |
|                                     | <i>Breast cancer</i>        | 2  | 931  | 948  | 0.899        | 0.519-1.557        | 0.705        | F | 0.002 | 0.964 | 0.0   | NA    |
|                                     | <i>Bladder cancer</i>       | 1  | 526  | 515  | 0.735        | 0.399-1.351        | 0.321        | F | 0.0   | 1.0   | 0.0   | NA    |
|                                     | <i>CML</i>                  | 1  | 218  | 305  | 1.327        | 0.627-2.809        | 0.460        | F | 0.0   | 1.0   | 0.0   | NA    |
|                                     | <i>CLL</i>                  | 1  | 88   | 276  | 1.047        | 0.207-5.281        | 0.956        | F | 0.0   | 1.0   | 0.0   | NA    |
|                                     | <i>Colon cancer</i>         | 1  | 829  | 821  | 0.779        | 0.481-1.261        | 0.309        | F | 0.0   | 1.0   | 0.0   | NA    |
|                                     | <i>Esophageal cancer</i>    | 1  | 248  | 248  | 1.000        | 0.409-2.447        | 1.000        | F | 0.0   | 1.0   | 0.0   | NA    |
|                                     | <i>NHL</i>                  | 1  | 131  | 394  | 1.359        | 0.576-3.202        | 0.484        | F | 0.0   | 1.0   | 0.0   | NA    |
|                                     | <i>Renal cell carcinoma</i> | 1  | 200  | 185  | <b>0.412</b> | <b>0.173-0.978</b> | <b>0.044</b> | F | 0.0   | 1.0   | 0.0   | NA    |
|                                     | Genotyping method           |    |      |      |              |                    |              |   |       |       |       |       |
|                                     | <i>TaqMan</i>               | 4  | 1237 | 1529 | 1.031        | 0.673-1.581        | 0.888        | F | 0.675 | 0.879 | 0.0   | 0.974 |
|                                     | <i>SNPlex technology</i>    | 3  | 974  | 948  | 0.683        | 0.442-1.055        | 0.085        | F | 2.066 | 0.356 | 3.173 | 0.897 |
|                                     | <i>Other methods</i>        | 2  | 960  | 1215 | 0.890        | 0.585-1.355        | 0.587        | F | 1.229 | 0.268 | 18.64 | NA    |
|                                     | Source of controls          |    |      |      |              |                    |              |   |       |       |       |       |
|                                     | <i>Population-based</i>     | 5  | 2048 | 2230 | 0.757        | 0.546-1.051        | 0.096        | F | 2.449 | 0.654 | 0.0   | 0.993 |
|                                     | <i>Hospital-based</i>       | 4  | 1123 | 1462 | 1.013        | 0.695-1.474        | 0.948        | F | 2.018 | 0.569 | 0.0   | 0.272 |

|                                      |                             |    |      |      |              |                    |              |   |        |       |       |       |
|--------------------------------------|-----------------------------|----|------|------|--------------|--------------------|--------------|---|--------|-------|-------|-------|
|                                      | HWE in controls             |    |      |      |              |                    |              |   |        |       |       |       |
|                                      | <i>Equilibrium</i>          | 9  | 3171 | 3692 | 0.858        | 0.671-1.099        | 0.225        | F | 5.771  | 0.673 | 0.0   | 0.570 |
|                                      | Quality score               |    |      |      |              |                    |              |   |        |       |       |       |
|                                      | <i>High quality</i>         | 8  | 2918 | 3441 | 0.853        | 0.658-1.106        | 0.230        | F | 5.747  | 0.570 | 0.0   | 0.613 |
| Heterozygote model<br>(GC versus GG) | <i>Low quality</i>          | 1  | 253  | 251  | 0.912        | 0.408-2.039        | 0.822        | F | 0.0    | 1.0   | 0.0   | NA    |
|                                      | Overall                     | 11 | 4625 | 5301 | <b>0.870</b> | <b>0.781-0.969</b> | <b>0.011</b> | R | 19.101 | 0.039 | 47.65 | 0.988 |
|                                      | Geographical region         |    |      |      |              |                    |              |   |        |       |       |       |
|                                      | <i>Asian</i>                | 3  | 1242 | 1207 | 0.898        | 0.741-1.089        | 0.274        | F | 3.241  | 0.198 | 38.29 | 0.646 |
|                                      | <i>European</i>             | 2  | 506  | 685  | 1.125        | 0.600-2.111        | 0.713        | R | 3.755  | 0.053 | 73.37 | NA    |
|                                      | <i>American</i>             | 5  | 2579 | 2955 | <b>0.869</b> | <b>0.772-0.977</b> | <b>0.019</b> | F | 4.470  | 0.346 | 10.52 | 0.460 |
|                                      | <i>Mexican</i>              | 1  | 298  | 454  | 0.815        | 0.597-1.111        | 0.196        | F | 0.0    | 1.0   | 0.0   | NA    |
|                                      | Cancer type                 |    |      |      |              |                    |              |   |        |       |       |       |
|                                      | <i>Breast cancer</i>        | 2  | 1253 | 1219 | 1.198        | 0.810-1.770        | 0.366        | R | 4.270  | 0.039 | 76.58 | NA    |
|                                      | <i>Bladder cancer</i>       | 1  | 719  | 714  | 0.915        | 0.730-1.146        | 0.438        | F | 0.0    | 1.0   | 0.0   | NA    |
|                                      | <i>CML</i>                  | 1  | 298  | 454  | 0.815        | 0.597-1.111        | 0.196        | F | 0.0    | 1.0   | 0.0   | NA    |
|                                      | <i>CLL</i>                  | 1  | 103  | 339  | 0.774        | 0.432-1.386        | 0.388        | F | 0.0    | 1.0   | 0.0   | NA    |
|                                      | <i>Colon cancer</i>         | 1  | 1084 | 1134 | <b>0.796</b> | <b>0.662-0.958</b> | <b>0.016</b> | F | 0.0    | 1.0   | 0.0   | NA    |
|                                      | <i>Esophageal cancer</i>    | 1  | 336  | 336  | 1.000        | 0.717-1.395        | 1.000        | F | 0.0    | 1.0   | 0.0   | NA    |
|                                      | <i>Lung cancer</i>          | 1  | 92   | 90   | 0.909        | 0.441-1.872        | 0.796        | F | 0.0    | 1.0   | 0.0   | NA    |
|                                      | <i>NHL</i>                  | 1  | 172  | 510  | 1.118        | 0.760-1.643        | 0.571        | F | 0.0    | 1.0   | 0.0   | NA    |
|                                      | <i>Prostate cancer</i>      | 1  | 300  | 244  | <b>0.644</b> | <b>0.427-0.973</b> | <b>0.037</b> | F | 0.0    | 1.0   | 0.0   | NA    |
|                                      | <i>Renal cell carcinoma</i> | 1  | 268  | 261  | 0.715        | 0.495-1.032        | 0.073        | F | 0.0    | 1.0   | 0.0   | NA    |
|                                      | Genotyping method           |    |      |      |              |                    |              |   |        |       |       |       |
|                                      | <i>TaqMan</i>               | 4  | 1654 | 2012 | 1.013        | 0.766-1.339        | 0.929        | R | 8.763  | 0.033 | 65.77 | 0.764 |
|                                      | <i>HRM method</i>           | 1  | 300  | 244  | <b>0.644</b> | <b>0.427-0.973</b> | <b>0.037</b> | F | 0.0    | 1.0   | 0.0   | NA    |
|                                      | <i>SNPlex technology</i>    | 3  | 1323 | 1311 | 0.889        | 0.753-1.050        | 0.166        | F | 1.894  | 0.388 | 0.0   | 0.711 |
|                                      | <i>Other methods</i>        | 3  | 1348 | 1734 | 0.851        | 0.724-1.001        | 0.052        | F | 2.455  | 0.293 | 18.54 | 0.538 |
|                                      | Source of controls          |    |      |      |              |                    |              |   |        |       |       |       |
|                                      | <i>Population-based</i>     | 5  | 2708 | 2953 | 0.934        | 0.726-1.200        | 0.592        | R | 14.48  | 0.006 | 72.37 | 0.889 |
|                                      | <i>Hospital-based</i>       | 6  | 1917 | 2348 | 0.896        | 0.782-1.027        | 0.114        | F | 4.536  | 0.475 | 0.0   | 0.841 |
|                                      | HWE in controls             |    |      |      |              |                    |              |   |        |       |       |       |
|                                      | <i>Equilibrium</i>          | 10 | 4325 | 5057 | 0.938        | 0.821-1.071        | 0.344        | R | 16.27  | 0.061 | 44.69 | 0.742 |
|                                      | <i>Disequilibrium</i>       | 1  | 300  | 244  | <b>0.644</b> | <b>0.427-0.973</b> | <b>0.037</b> | F | 0.0    | 1.0   | 0.0   | NA    |
|                                      | Quality score               |    |      |      |              |                    |              |   |        |       |       |       |
|                                      | <i>High quality</i>         | 8  | 3830 | 4621 | 0.882        | 0.800-0.972        | 0.011        | F | 6.019  | 0.538 | 0.0   | 0.865 |
|                                      | <i>Low quality</i>          | 3  | 795  | 680  | 0.971        | 0.537-1.755        | 0.922        | R | 10.45  | 0.005 | 80.86 | 0.641 |

OR: odds ratio, CI: confidence interval, F: fixed model, R: random model, NA: not appreciable

Supplementary Table S25. Meta-analysis of the association between **GEMIN4 (C > T; rs3744741)** variant and cancer risk.

| Comparison                                         | Subgroups                   | No. of studies | Sample size |         | Test of association |                    |              |       | Test of heterogeneity |         |                    | Publication bias  |
|----------------------------------------------------|-----------------------------|----------------|-------------|---------|---------------------|--------------------|--------------|-------|-----------------------|---------|--------------------|-------------------|
|                                                    |                             |                | Cancer      | Control | OR                  | 95% CI             | P-value      | Model | Q test                | P-value | I <sup>2</sup> (%) | P-value (Egger's) |
| <b>Allelic model</b><br>(T allele versus C allele) | <b>Overall</b>              | 9              | 6784        | 7464    | 0.957               | 0.880-1.041        | 0.307        | F     | 9.710                 | 0.286   | 17.61              | 0.883             |
|                                                    | <b>Geographical region</b>  |                |             |         |                     |                    |              |       |                       |         |                    |                   |
|                                                    | <i>Asian</i>                | 5              | 3842        | 4044    | 1.012               | 0.914-1.120        | 0.825        | F     | 4.024                 | 0.403   | 0.586              | 0.727             |
|                                                    | <i>European</i>             | 1              | 212         | 694     | 0.827               | 0.508-1.346        | 0.445        | F     | 0.0                   | 1.0     | 0.0                | NA                |
|                                                    | <i>American</i>             | 3              | 2730        | 2726    | <b>0.854</b>        | <b>0.731-0.998</b> | <b>0.047</b> | F     | 2.136                 | 0.344   | 6.369              | 0.667             |
|                                                    | <b>Cancer type</b>          |                |             |         |                     |                    |              |       |                       |         |                    |                   |
|                                                    | <i>Breast cancer</i>        | 2              | 2842        | 2908    | 1.010               | 0.898-1.137        | 0.863        | F     | 0.690                 | 0.406   | 0.0                | NA                |
|                                                    | <i>Renal cell carcinoma</i> | 2              | 754         | 1004    | 1.150               | 0.897-1.473        | 0.270        | F     | 0.477                 | 0.490   | 0.0                | NA                |
|                                                    | <i>Bladder cancer</i>       | 1              | 1484        | 1480    | 0.822               | 0.665-1.017        | 0.071        | F     | 0.0                   | 1.0     | 0.0                | NA                |
|                                                    | <i>CLL</i>                  | 1              | 212         | 694     | 0.827               | 0.508-1.346        | 0.445        | F     | 0.0                   | 1.0     | 0.0                | NA                |
|                                                    | <i>Esophageal cancer</i>    | 1              | 692         | 692     | 0.771               | 0.565-1.051        | 0.099        | F     | 0.0                   | 1.0     | 0.0                | NA                |
|                                                    | <i>Prostate cancer</i>      | 1              | 600         | 488     | 0.846               | 0.638-1.121        | 0.245        | F     | 0.0                   | 1.0     | 0.0                | NA                |
|                                                    | <i>Lung cancer</i>          | 1              | 200         | 198     | 1.167               | 0.734-1.854        | 0.514        | F     | 0.0                   | 1.0     | 0.0                | NA                |
|                                                    | <b>Genotyping method</b>    |                |             |         |                     |                    |              |       |                       |         |                    |                   |
|                                                    | <i>TaqMan</i>               | 4              | 3254        | 4052    | 1.020               | 0.915-1.138        | 0.716        | F     | 2.747                 | 0.432   | 0.0                | 0.935             |
|                                                    | <i>SNPlex technology</i>    | 3              | 2730        | 2726    | <b>0.854</b>        | <b>0.731-0.998</b> | <b>0.047</b> | F     | 2.136                 | 0.344   | 6.369              | 0.667             |
|                                                    | <i>Other methods</i>        | 2              | 800         | 686     | 0.923               | 0.725-1.174        | 0.512        | F     | 1.348                 | 0.246   | 25.82              | NA                |
|                                                    | <b>Source of controls</b>   |                |             |         |                     |                    |              |       |                       |         |                    |                   |
|                                                    | <i>Population-based</i>     | 4              | 2690        | 3472    | 1.057               | 0.935-1.195        | 0.376        | F     | 1.902                 | 0.593   | 0.0                | 0.916             |
|                                                    | <i>Hospital-based</i>       | 5              | 4094        | 3992    | <b>0.878</b>        | <b>0.783-0.985</b> | <b>0.026</b> | F     | 3.125                 | 0.537   | 0.0                | 0.697             |
|                                                    | <b>HWE in controls</b>      |                |             |         |                     |                    |              |       |                       |         |                    |                   |
|                                                    | <i>Equilibrium</i>          | 9              | 6784        | 7464    | 0.957               | 0.880-1.041        | 0.307        | F     | 9.710                 | 0.286   | 17.61              | 0.883             |
|                                                    | <b>Quality score</b>        |                |             |         |                     |                    |              |       |                       |         |                    |                   |
|                                                    | <i>High quality</i>         | 8              | 6584        | 7266    | 0.951               | 0.873-1.035        | 0.246        | F     | 8.987                 | 0.254   | 22.11              | 0.613             |
|                                                    | <i>Low quality</i>          | 1              | 200         | 198     | 1.167               | 0.734-1.854        | 0.514        | F     | 0.0                   | 1.0     | 0.0                | NA                |
| <b>Recessive model</b><br>(TT versus CC+CT)        | <b>Overall</b>              | 9              | 3392        | 3732    | 1.027               | 0.824-1.281        | 0.813        | F     | 7.236                 | 0.511   | 0.0                | 0.482             |
|                                                    | <b>Geographical region</b>  |                |             |         |                     |                    |              |       |                       |         |                    |                   |
|                                                    | <i>Asian</i>                | 5              | 1921        | 2022    | 1.054               | 0.826-1.346        | 0.672        | F     | 3.474                 | 0.482   | 0.0                | 0.637             |
|                                                    | <i>European</i>             | 1              | 106         | 347     | 3.317               | 0.462-23.84        | 0.233        | F     | 0.0                   | 1.0     | 0.0                | NA                |
|                                                    | <i>American</i>             | 3              | 1365        | 1363    | 0.831               | 0.487-1.420        | 0.499        | F     | 1.762                 | 0.414   | 0.0                | 0.693             |
|                                                    | <b>Cancer type</b>          |                |             |         |                     |                    |              |       |                       |         |                    |                   |
|                                                    | <i>Breast cancer</i>        | 2              | 1421        | 1454    | 1.015               | 0.761-1.355        | 0.918        | F     | 0.223                 | 0.637   | 0.0                | NA                |
|                                                    | <i>Renal cell carcinoma</i> | 2              | 377         | 502     | 1.838               | 0.971-3.480        | 0.061        | F     | 0.072                 | 0.788   | 0.0                | NA                |
|                                                    | <i>Bladder cancer</i>       | 1              | 742         | 740     | 0.715               | 0.348-1.471        | 0.362        | F     | 0.0                   | 1.0     | 0.0                | NA                |
|                                                    | <i>CLL</i>                  | 1              | 106         | 347     | 3.317               | 0.462-23.84        | 0.233        | F     | 0.0                   | 1.0     | 0.0                | NA                |
|                                                    | <i>Esophageal cancer</i>    | 1              | 346         | 346     | 0.620               | 0.201-1.913        | 0.405        | F     | 0.0                   | 1.0     | 0.0                | NA                |
|                                                    | <i>Prostate cancer</i>      | 1              | 300         | 244     | 0.800               | 0.420-1.524        | 0.497        | F     | 0.0                   | 1.0     | 0.0                | NA                |
|                                                    | <i>Lung cancer</i>          | 1              | 100         | 99      | 1.200               | 0.354-4.068        | 0.770        | F     | 0.0                   | 1.0     | 0.0                | NA                |
|                                                    | <b>Genotyping method</b>    |                |             |         |                     |                    |              |       |                       |         |                    |                   |
|                                                    | <i>TaqMan</i>               | 4              | 1627        | 2026    | 1.122               | 0.859-1.467        | 0.399        | F     | 3.814                 | 0.282   | 21.35              | 0.219             |
|                                                    | <i>SNPlex technology</i>    | 3              | 1365        | 1363    | 0.831               | 0.487-1.420        | 0.499        | F     | 1.762                 | 0.414   | 0.0                | 0.693             |
|                                                    | <i>Other methods</i>        | 2              | 400         | 343     | 0.874               | 0.494-1.545        | 0.643        | F     | 0.331                 | 0.565   | 0.0                | NA                |
|                                                    | <b>Source of controls</b>   |                |             |         |                     |                    |              |       |                       |         |                    |                   |
|                                                    | <i>Population-based</i>     | 4              | 1345        | 1736    | 1.237               | 0.914-1.676        | 0.169        | F     | 3.217                 | 0.359   | 6.754              | <b>0.095</b>      |
|                                                    | <i>Hospital-based</i>       | 5              | 2047        | 1996    | 0.833               | 0.603-1.149        | 0.265        | F     | 0.934                 | 0.920   | 0.0                | 0.834             |
|                                                    | <b>HWE in controls</b>      |                |             |         |                     |                    |              |       |                       |         |                    |                   |
|                                                    | <i>Equilibrium</i>          | 9              | 3392        | 3732    | 1.027               | 0.824-1.281        | 0.813        | F     | 7.236                 | 0.511   | 0.0                | 0.482             |
|                                                    | <b>Quality score</b>        |                |             |         |                     |                    |              |       |                       |         |                    |                   |
|                                                    | <i>High quality</i>         | 8              | 3292        | 3633    | 1.022               | 0.816-1.279        | 0.852        | F     | 7.172                 | 0.411   | 2.394              | 0.543             |
|                                                    | <i>Low quality</i>          | 1              | 100         | 99      | 1.200               | 0.354-4.068        | 0.770        | F     | 0.0                   | 1.0     | 0.0                | NA                |
| <b>Dominant model</b><br>(CT+TT versus CC)         | <b>Overall</b>              | 9              | 3392        | 3732    | 0.935               | 0.845-1.033        | 0.187        | F     | 7.521                 | 0.482   | 0.0                | 0.799             |
|                                                    | <b>Geographical region</b>  |                |             |         |                     |                    |              |       |                       |         |                    |                   |
|                                                    | <i>Asian</i>                | 5              | 1921        | 2022    | 1.004               | 0.885-1.140        | 0.949        | F     | 2.594                 | 0.628   | 0.0                | 0.836             |
|                                                    | <i>European</i>             | 1              | 106         | 347     | 0.738               | 0.432-1.262        | 0.267        | F     | 0.0                   | 1.0     | 0.0                | NA                |

|                                      |                             |   |      |      |              |                    |              |   |       |       |       |              |
|--------------------------------------|-----------------------------|---|------|------|--------------|--------------------|--------------|---|-------|-------|-------|--------------|
|                                      | <i>American</i>             | 3 | 1365 | 1363 | <b>0.837</b> | <b>0.704-0.996</b> | <b>0.045</b> | F | 1.411 | 0.494 | 0.0   | 0.686        |
|                                      | Cancer type                 |   |      |      |              |                    |              |   |       |       |       |              |
|                                      | <i>Breast cancer</i>        | 2 | 1421 | 1454 | 1.012        | 0.874-1.173        | 0.870        | F | 0.638 | 0.424 | 0.0   | NA           |
|                                      | <i>Renal cell carcinoma</i> | 2 | 377  | 502  | 1.072        | 0.797-1.440        | 0.647        | F | 0.173 | 0.677 | 0.0   | NA           |
|                                      | <i>Bladder cancer</i>       | 1 | 742  | 740  | 0.813        | 0.642-1.030        | 0.086        | F | 0.0   | 1.0   | 0.0   | NA           |
|                                      | <i>CLL</i>                  | 1 | 106  | 347  | 0.738        | 0.432-1.262        | 0.267        | F | 0.0   | 1.0   | 0.0   | NA           |
|                                      | <i>Esophageal cancer</i>    | 1 | 346  | 346  | 0.758        | 0.537-1.070        | 0.115        | F | 0.0   | 1.0   | 0.0   | NA           |
|                                      | <i>Prostate cancer</i>      | 1 | 300  | 244  | 0.829        | 0.587-1.172        | 0.289        | F | 0.0   | 1.0   | 0.0   | NA           |
|                                      | <i>Lung cancer</i>          | 1 | 100  | 99   | 1.209        | 0.688-2.125        | 0.510        | F | 0.0   | 1.0   | 0.0   | NA           |
|                                      | Genotyping method           |   |      |      |              |                    |              |   |       |       |       |              |
|                                      | <i>TaqMan</i>               | 4 | 1627 | 2026 | 1.003        | 0.876-1.149        | 0.963        | F | 2.269 | 0.519 | 0.0   | 0.592        |
|                                      | <i>SNPlex technology</i>    | 3 | 1365 | 1363 | <b>0.837</b> | <b>0.704-0.996</b> | <b>0.045</b> | F | 1.411 | 0.494 | 0.0   | 0.686        |
|                                      | <i>Other methods</i>        | 2 | 400  | 343  | 0.919        | 0.685-1.234        | 0.575        | F | 1.245 | 0.265 | 19.68 | NA           |
|                                      | Source of controls          |   |      |      |              |                    |              |   |       |       |       |              |
|                                      | <i>Population-based</i>     | 4 | 1345 | 1736 | 1.034        | 0.888-1.203        | 0.670        | F | 1.823 | 0.610 | 0.0   | 0.513        |
|                                      | <i>Hospital-based</i>       | 5 | 2047 | 1996 | <b>0.864</b> | <b>0.755-0.988</b> | <b>0.033</b> | F | 2.690 | 0.611 | 0.0   | 0.547        |
|                                      | HWE in controls             |   |      |      |              |                    |              |   |       |       |       |              |
|                                      | <i>Equilibrium</i>          | 9 | 3392 | 3732 | 0.935        | 0.845-1.033        | 0.187        | F | 7.521 | 0.482 | 0.0   | 0.799        |
|                                      | Quality score               |   |      |      |              |                    |              |   |       |       |       |              |
|                                      | <i>High quality</i>         | 8 | 3292 | 3633 | 0.927        | 0.837-1.026        | 0.144        | F | 6.696 | 0.461 | 0.0   | 0.447        |
|                                      | <i>Low quality</i>          | 1 | 100  | 99   | 1.209        | 0.688-2.125        | 0.510        | F | 0.0   | 1.0   | 0.0   | NA           |
| Homozygote model<br>(TT versus CC)   | Overall                     | 9 | 2362 | 2550 | 1.017        | 0.812-1.274        | 0.882        | F | 7.768 | 0.456 | 0.0   | 0.557        |
|                                      | Geographical region         |   |      |      |              |                    |              |   |       |       |       |              |
|                                      | <i>Asian</i>                | 5 | 1204 | 1259 | 1.053        | 0.820-1.353        | 0.685        | F | 3.789 | 0.435 | 0.0   | 0.669        |
|                                      | <i>European</i>             | 1 | 87   | 262  | 3.059        | 0.424-22.05        | 0.267        | F | 0.0   | 1.0   | 0.0   | NA           |
|                                      | <i>American</i>             | 3 | 1071 | 1029 | 0.799        | 0.467-1.367        | 0.413        | F | 1.935 | 0.380 | 0.0   | 0.698        |
|                                      | Cancer type                 |   |      |      |              |                    |              |   |       |       |       |              |
|                                      | <i>Breast cancer</i>        | 2 | 870  | 893  | 1.024        | 0.761-1.376        | 0.877        | F | 0.365 | 0.546 | 0.0   | NA           |
|                                      | <i>Renal cell carcinoma</i> | 2 | 276  | 349  | 1.835        | 0.954-3.530        | 0.069        | F | 0.078 | 0.780 | 0.0   | NA           |
|                                      | <i>Bladder cancer</i>       | 1 | 586  | 561  | 0.684        | 0.332-1.410        | 0.304        | F | 0.0   | 1.0   | 0.0   | NA           |
|                                      | <i>CLL</i>                  | 1 | 87   | 262  | 3.059        | 0.424-22.05        | 0.267        | F | 0.0   | 1.0   | 0.0   | NA           |
|                                      | <i>Esophageal cancer</i>    | 1 | 273  | 258  | 0.583        | 0.188-1.806        | 0.350        | F | 0.0   | 1.0   | 0.0   | NA           |
|                                      | <i>Prostate cancer</i>      | 1 | 208  | 162  | 0.755        | 0.392-1.457        | 0.403        | F | 0.0   | 1.0   | 0.0   | NA           |
|                                      | <i>Lung cancer</i>          | 1 | 62   | 65   | 1.286        | 0.372-4.449        | 0.692        | F | 0.0   | 1.0   | 0.0   | NA           |
|                                      | Genotyping method           |   |      |      |              |                    |              |   |       |       |       |              |
|                                      | <i>TaqMan</i>               | 4 | 1021 | 1294 | 1.129        | 0.857-1.485        | 0.389        | F | 3.583 | 0.310 | 16.27 | 0.260        |
|                                      | <i>SNPlex technology</i>    | 3 | 1071 | 1029 | 0.799        | 0.467-1.367        | 0.413        | F | 1.935 | 0.380 | 0.0   | 0.698        |
|                                      | <i>Other methods</i>        | 2 | 270  | 227  | 0.849        | 0.475-1.517        | 0.579        | F | 0.551 | 0.458 | 0.0   | NA           |
|                                      | Source of controls          |   |      |      |              |                    |              |   |       |       |       |              |
|                                      | <i>Population-based</i>     | 4 | 872  | 1144 | 1.259        | 0.922-1.720        | 0.147        | F | 2.734 | 0.434 | 0.0   | <b>0.098</b> |
|                                      | <i>Hospital-based</i>       | 5 | 1490 | 1406 | 0.805        | 0.581-1.116        | 0.193        | F | 1.261 | 0.868 | 0.0   | 0.936        |
|                                      | HWE in controls             |   |      |      |              |                    |              |   |       |       |       |              |
|                                      | <i>Equilibrium</i>          | 9 | 2362 | 2550 | 1.017        | 0.812-1.274        | 0.882        | F | 7.768 | 0.456 | 0.0   | 0.557        |
|                                      | Quality score               |   |      |      |              |                    |              |   |       |       |       |              |
|                                      | <i>High quality</i>         | 8 | 2300 | 2485 | 1.009        | 0.802-1.269        | 0.938        | F | 7.627 | 0.367 | 8.216 | 0.651        |
|                                      | <i>Low quality</i>          | 1 | 62   | 65   | 1.286        | 0.372-4.449        | 0.692        | F | 0.0   | 1.0   | 0.0   | NA           |
| Heterozygote model<br>(CT versus CC) | Overall                     | 9 | 3226 | 3558 | 0.928        | 0.835-1.030        | 0.161        | F | 5.844 | 0.665 | 0.0   | 0.520        |
|                                      | Geographical region         |   |      |      |              |                    |              |   |       |       |       |              |
|                                      | <i>Asian</i>                | 5 | 1783 | 1881 | 0.997        | 0.872-1.139        | 0.964        | F | 1.629 | 0.804 | 0.0   | 0.937        |
|                                      | <i>European</i>             | 1 | 104  | 345  | 0.684        | 0.393-1.190        | 0.179        | F | 0.0   | 1.0   | 0.0   | NA           |
|                                      | <i>American</i>             | 3 | 1339 | 1332 | 0.841        | 0.703-1.006        | 0.058        | F | 0.777 | 0.678 | 0.0   | 0.720        |
|                                      | Cancer type                 |   |      |      |              |                    |              |   |       |       |       |              |
|                                      | <i>Breast cancer</i>        | 2 | 1322 | 1354 | 1.012        | 0.867-1.180        | 0.883        | F | 0.475 | 0.491 | 0.0   | NA           |
|                                      | <i>Renal cell carcinoma</i> | 2 | 356  | 481  | 0.988        | 0.724-1.347        | 0.938        | F | 0.011 | 0.915 | 0.0   | NA           |
|                                      | <i>Bladder cancer</i>       | 1 | 729  | 722  | 0.826        | 0.647-1.055        | 0.125        | F | 0.0   | 1.0   | 0.0   | NA           |
|                                      | <i>CLL</i>                  | 1 | 104  | 345  | 0.684        | 0.393-1.190        | 0.179        | F | 0.0   | 1.0   | 0.0   | NA           |
|                                      | <i>Esophageal cancer</i>    | 1 | 341  | 338  | 0.774        | 0.543-1.104        | 0.157        | F | 0.0   | 1.0   | 0.0   | NA           |
|                                      | <i>Prostate cancer</i>      | 1 | 280  | 224  | 0.847        | 0.586-1.226        | 0.379        | F | 0.0   | 1.0   | 0.0   | NA           |

|  |                           |   |      |      |       |             |       |   |       |       |     |       |
|--|---------------------------|---|------|------|-------|-------------|-------|---|-------|-------|-----|-------|
|  | <i>Lung cancer</i>        | 1 | 94   | 94   | 1.197 | 0.665-2.158 | 0.549 | F | 0.0   | 1.0   | 0.0 | NA    |
|  | <i>Genotyping method</i>  |   |      |      |       |             |       |   |       |       |     |       |
|  | <i>TaqMan</i>             | 4 | 1513 | 1908 | 0.986 | 0.855-1.137 | 0.842 | F | 2.265 | 0.519 | 0.0 | 0.289 |
|  | <i>SNPlex technology</i>  | 3 | 1339 | 1332 | 0.841 | 0.703-1.006 | 0.058 | F | 0.777 | 0.678 | 0.0 | 0.719 |
|  | <i>Other methods</i>      | 2 | 374  | 318  | 0.934 | 0.683-1.277 | 0.669 | F | 0.951 | 0.329 | 0.0 | NA    |
|  | <i>Source of controls</i> |   |      |      |       |             |       |   |       |       |     |       |
|  | <i>Population-based</i>   | 4 | 1253 | 1646 | 1.001 | 0.854-1.174 | 0.989 | F | 2.119 | 0.548 | 0.0 | 0.250 |
|  | <i>Hospital-based</i>     | 5 | 1973 | 1912 | 0.875 | 0.761-1.006 | 0.061 | F | 2.165 | 0.705 | 0.0 | 0.528 |
|  | <i>HWE in controls</i>    |   |      |      |       |             |       |   |       |       |     |       |
|  | <i>Equilibrium</i>        | 9 | 3226 | 3558 | 0.928 | 0.835-1.030 | 0.161 | F | 5.844 | 0.665 | 0.0 | 0.520 |
|  | <i>Quality score</i>      |   |      |      |       |             |       |   |       |       |     |       |
|  | <i>High quality</i>       | 8 | 3132 | 3464 | 0.920 | 0.827-1.024 | 0.125 | F | 5.098 | 0.648 | 0.0 | 0.193 |
|  | <i>Low quality</i>        | 1 | 94   | 94   | 1.197 | 0.665-2.158 | 0.549 | F | 0.0   | 1.0   | 0.0 | NA    |

OR: odds ratio, CI: confidence interval, F: fixed model, R: random model, NA: not appreciable



Supplementary Table S26. Meta-analysis of the association between **PIWIL1 rs1106042 G > A** variant and cancer risk.

| Comparison                                          | Subgroups                   | No. of studies | Sample size |         | Test of association |                    |              |       | Test of heterogeneity |         |                    | Publication bias  |
|-----------------------------------------------------|-----------------------------|----------------|-------------|---------|---------------------|--------------------|--------------|-------|-----------------------|---------|--------------------|-------------------|
|                                                     |                             |                | Cancer      | Control | OR                  | 95% CI             | P-value      | Model | Q test                | P-value | I <sup>2</sup> (%) | P-value (Egger's) |
| <b>Allelic model<br/>(A allele versus G allele)</b> | <b>Overall</b>              | 5              | 3494        | 5834    | 0.878               | 0.745-1.034        | 0.119        | F     | 7.492                 | 0.112   | 46.61              | 0.678             |
|                                                     | <b>Geographical region</b>  |                |             |         |                     |                    |              |       |                       |         |                    |                   |
|                                                     | <i>Asian</i>                | 2              | 1344        | 3296    | 0.889               | 0.541-1.462        | 0.644        | R     | 2.753                 | 0.097   | 63.67              | NA                |
|                                                     | <i>European</i>             | 1              | 208         | 686     | 0.774               | 0.382-1.572        | 0.479        | F     | 0.0                   | 1.0     | 0.0                | NA                |
|                                                     | <i>American</i>             | 2              | 1942        | 1852    | 1.037               | 0.797-1.350        | 0.786        | F     | 2.205                 | 0.138   | 54.66              | NA                |
|                                                     | <b>Cancer type</b>          |                |             |         |                     |                    |              |       |                       |         |                    |                   |
|                                                     | <i>Head/Neck carcinoma</i>  | 1              | 1150        | 3102    | <b>0.732</b>        | <b>0.576-0.928</b> | <b>0.010</b> | F     | 0.0                   | 1.0     | 0.0                | NA                |
|                                                     | <i>CLL</i>                  | 1              | 208         | 686     | 0.774               | 0.382-1.572        | 0.479        | F     | 0.0                   | 1.0     | 0.0                | NA                |
|                                                     | <i>Lung cancer</i>          | 1              | 194         | 194     | 1.237               | 0.698-2.192        | 0.467        | F     | 0.0                   | 1.0     | 0.0                | NA                |
|                                                     | <i>Bladder cancer</i>       | 1              | 1416        | 1382    | 1.178               | 0.862-1.609        | 0.305        | F     | 0.0                   | 1.0     | 0.0                | NA                |
|                                                     | <i>Renal cell carcinoma</i> | 1              | 526         | 470     | 0.758               | 0.464-1.238        | 0.268        | F     | 0.0                   | 1.0     | 0.0                | NA                |
|                                                     | <b>Genotyping method</b>    |                |             |         |                     |                    |              |       |                       |         |                    |                   |
|                                                     | <i>TaqMan</i>               | 1              | 208         | 686     | 0.774               | 0.382-1.572        | 0.479        | F     | 0.0                   | 1.0     | 0.0                | NA                |
|                                                     | <i>SNPlex technology</i>    | 2              | 1942        | 1852    | 1.037               | 0.797-1.350        | 0.786        | F     | 2.205                 | 0.138   | 54.66              | NA                |
|                                                     | <i>Other methods</i>        | 2              | 1344        | 3296    | 0.889               | 0.541-1.462        | 0.644        | R     | 2.753                 | 0.097   | 63.67              | NA                |
|                                                     | <b>Source of controls</b>   |                |             |         |                     |                    |              |       |                       |         |                    |                   |
|                                                     | <i>Population-based</i>     | 3              | 1884        | 4258    | <b>0.740</b>        | <b>0.602-0.908</b> | <b>0.004</b> | F     | 0.034                 | 0.983   | 0.0                | <b>0.054</b>      |
|                                                     | <i>Hospital-based</i>       | 2              | 1610        | 1576    | 1.191               | 0.905-1.567        | 0.212        | F     | 0.022                 | 0.883   | 0.0                | NA                |
|                                                     | <b>HWE in controls</b>      |                |             |         |                     |                    |              |       |                       |         |                    |                   |
|                                                     | <i>Equilibrium</i>          | 5              | 3494        | 5834    | 0.878               | 0.745-1.034        | 0.119        | F     | 7.492                 | 0.112   | 46.61              | 0.678             |
|                                                     | <b>Quality score</b>        |                |             |         |                     |                    |              |       |                       |         |                    |                   |
|                                                     | <i>High quality</i>         | 4              | 3300        | 5640    | 0.851               | 0.717-1.010        | 0.065        | F     | 5.990                 | 0.112   | 49.91              | 0.959             |
|                                                     | <i>Low quality</i>          | 1              | 194         | 194     | 1.237               | 0.698-2.192        | 0.467        | F     | 0.0                   | 1.0     | 0.0                | NA                |
| <b>Recessive model<br/>(AA versus GG+GA)</b>        | <b>Overall</b>              | 5              | 1747        | 2917    | 0.899               | 0.414-1.953        | 0.789        | F     | 3.713                 | 0.446   | 0.0                | 0.700             |
|                                                     | <b>Geographical region</b>  |                |             |         |                     |                    |              |       |                       |         |                    |                   |
|                                                     | <i>Asian</i>                | 2              | 672         | 1648    | 0.895               | 0.332-2.410        | 0.826        | F     | 1.379                 | 0.240   | 27.47              | NA                |
|                                                     | <i>European</i>             | 1              | 104         | 343     | 2.222               | 0.366-13.48        | 0.385        | F     | 0.0                   | 1.0     | 0.0                | NA                |
|                                                     | <i>American</i>             | 2              | 971         | 926     | 0.401               | 0.072-2.241        | 0.298        | F     | 0.520                 | 0.471   | 0.0                | NA                |
|                                                     | <b>Cancer type</b>          |                |             |         |                     |                    |              |       |                       |         |                    |                   |
|                                                     | <i>Head/Neck carcinoma</i>  | 1              | 575         | 1551    | 0.672               | 0.224-2.019        | 0.479        | F     | 0.0                   | 1.0     | 0.0                | NA                |
|                                                     | <i>CLL</i>                  | 1              | 104         | 343     | 2.222               | 0.366-13.48        | 0.385        | F     | 0.0                   | 1.0     | 0.0                | NA                |
|                                                     | <i>Lung cancer</i>          | 1              | 97          | 97      | 3.064               | 0.313-29.98        | 0.336        | F     | 0.0                   | 1.0     | 0.0                | NA                |
|                                                     | <i>Bladder cancer</i>       | 1              | 708         | 691     | 0.243               | 0.027-2.179        | 0.206        | F     | 0.0                   | 1.0     | 0.0                | NA                |
|                                                     | <i>Renal cell carcinoma</i> | 1              | 263         | 235     | 0.893               | 0.056-14.36        | 0.936        | F     | 0.0                   | 1.0     | 0.0                | NA                |
|                                                     | <b>Genotyping method</b>    |                |             |         |                     |                    |              |       |                       |         |                    |                   |
|                                                     | <i>TaqMan</i>               | 1              | 104         | 343     | 2.222               | 0.366-13.48        | 0.385        | F     | 0.0                   | 1.0     | 0.0                | NA                |
|                                                     | <i>SNPlex technology</i>    | 2              | 971         | 926     | 0.401               | 0.072-2.241        | 0.298        | F     | 0.520                 | 0.471   | 0.0                | NA                |
|                                                     | <i>Other methods</i>        | 2              | 672         | 1648    | 0.895               | 0.332-2.410        | 0.826        | F     | 1.379                 | 0.240   | 27.47              | NA                |
|                                                     | <b>Source of controls</b>   |                |             |         |                     |                    |              |       |                       |         |                    |                   |
|                                                     | <i>Population-based</i>     | 3              | 942         | 2129    | 0.926               | 0.380-2.253        | 0.865        | F     | 1.233                 | 0.540   | 0.0                | 0.645             |
|                                                     | <i>Hospital-based</i>       | 2              | 805         | 788     | 0.821               | 0.169-3.992        | 0.807        | F     | 2.464                 | 0.116   | 59.42              | NA                |
|                                                     | <b>HWE in controls</b>      |                |             |         |                     |                    |              |       |                       |         |                    |                   |
|                                                     | <i>Equilibrium</i>          | 5              | 1747        | 2917    | 0.899               | 0.414-1.953        | 0.789        | F     | 3.713                 | 0.446   | 0.0                | 0.700             |
|                                                     | <b>Quality score</b>        |                |             |         |                     |                    |              |       |                       |         |                    |                   |
|                                                     | <i>High quality</i>         | 4              | 1650        | 2820    | 0.766               | 0.336-1.748        | 0.527        | F     | 2.460                 | 0.483   | 0.0                | 0.996             |
|                                                     | <i>Low quality</i>          | 1              | 97          | 97      | 3.064               | 0.313-29.98        | 0.336        | F     | 0.0                   | 1.0     | 0.0                | NA                |
| <b>Dominant model<br/>(GA+AA versus GG)</b>         | <b>Overall</b>              | 5              | 1747        | 2917    | 0.885               | 0.658-1.190        | 0.419        | R     | 8.785                 | 0.067   | 54.47              | 0.884             |
|                                                     | <b>Geographical region</b>  |                |             |         |                     |                    |              |       |                       |         |                    |                   |
|                                                     | <i>Asian</i>                | 2              | 672         | 1648    | <b>0.762</b>        | <b>0.602-0.966</b> | <b>0.025</b> | F     | 2.017                 | 0.156   | 50.42              | NA                |
|                                                     | <i>European</i>             | 1              | 104         | 343     | 0.650               | 0.293-1.438        | 0.287        | F     | 0.0                   | 1.0     | 0.0                | NA                |
|                                                     | <i>American</i>             | 2              | 971         | 926     | 0.999               | 0.601-1.661        | 0.997        | R     | 2.833                 | 0.092   | 64.70              | NA                |
|                                                     | <b>Cancer type</b>          |                |             |         |                     |                    |              |       |                       |         |                    |                   |
|                                                     | <i>Head/Neck carcinoma</i>  | 1              | 575         | 1551    | <b>0.712</b>        | <b>0.552-0.919</b> | <b>0.009</b> | F     | 0.0                   | 1.0     | 0.0                | NA                |
|                                                     | <i>CLL</i>                  | 1              | 104         | 343     | 0.650               | 0.293-1.438        | 0.287        | F     | 0.0                   | 1.0     | 0.0                | NA                |
|                                                     | <i>Lung cancer</i>          | 1              | 97          | 97      | 1.173               | 0.619-2.225        | 0.625        | F     | 0.0                   | 1.0     | 0.0                | NA                |
|                                                     | <i>Bladder cancer</i>       | 1              | 708         | 691     | 1.249               | 0.900-1.732        | 0.184        | F     | 0.0                   | 1.0     | 0.0                | NA                |
|                                                     | <i>Renal cell carcinoma</i> | 1              | 263         | 235     | 0.739               | 0.441-1.238        | 0.250        | F     | 0.0                   | 1.0     | 0.0                | NA                |
|                                                     | <b>Genotyping method</b>    |                |             |         |                     |                    |              |       |                       |         |                    |                   |
|                                                     | <i>TaqMan</i>               | 1              | 104         | 343     | 0.650               | 0.293-1.438        | 0.287        | F     | 0.0                   | 1.0     | 0.0                | NA                |

|                                      |                             |   |      |      |              |                    |              |   |       |       |       |       |
|--------------------------------------|-----------------------------|---|------|------|--------------|--------------------|--------------|---|-------|-------|-------|-------|
|                                      | <i>SNPlex technology</i>    | 2 | 971  | 926  | 0.999        | 0.601-1.661        | 0.997        | R | 2.833 | 0.092 | 64.70 | NA    |
|                                      | <i>Other methods</i>        | 2 | 672  | 1648 | <b>0.762</b> | <b>0.602-0.966</b> | <b>0.025</b> | F | 2.017 | 0.156 | 50.42 | NA    |
|                                      | Source of controls          |   |      |      |              |                    |              |   |       |       |       |       |
|                                      | <i>Population-based</i>     | 3 | 942  | 2129 | <b>0.712</b> | <b>0.571-0.887</b> | <b>0.002</b> | F | 0.071 | 0.965 | 0.0   | 0.728 |
|                                      | <i>Hospital-based</i>       | 2 | 805  | 788  | 1.233        | 0.921-1.650        | 0.160        | F | 0.029 | 0.865 | 0.0   | NA    |
|                                      | HWE in controls             |   |      |      |              |                    |              |   |       |       |       |       |
|                                      | <i>Equilibrium</i>          | 5 | 1747 | 2917 | 0.885        | 0.658-1.190        | 0.419        | R | 8.785 | 0.067 | 54.47 | 0.884 |
|                                      | Quality score               |   |      |      |              |                    |              |   |       |       |       |       |
|                                      | <i>High quality</i>         | 4 | 1650 | 2820 | 0.844        | 0.602-1.181        | 0.322        | R | 7.869 | 0.049 | 61.87 | 0.905 |
|                                      | <i>Low quality</i>          | 1 | 97   | 97   | 1.173        | 0.619-2.225        | 0.625        | F | 0.0   | 1.0   | 0.0   | NA    |
| Homozygote model<br>(AA versus GG)   | Overall                     | 5 | 1510 | 2446 | 0.867        | 0.399-1.885        | 0.719        | F | 3.687 | 0.450 | 0.0   | 0.659 |
|                                      | Geographical region         |   |      |      |              |                    |              |   |       |       |       |       |
|                                      | <i>Asian</i>                | 2 | 561  | 1317 | 0.856        | 0.317-2.307        | 0.758        | F | 1.520 | 0.218 | 34.23 | NA    |
|                                      | <i>European</i>             | 1 | 98   | 307  | 2.111        | 0.348-12.82        | 0.417        | F | 0.0   | 1.0   | 0.0   | NA    |
|                                      | <i>American</i>             | 2 | 851  | 822  | 0.402        | 0.072-2.248        | 0.299        | F | 0.465 | 0.495 | 0.0   | NA    |
|                                      | Cancer type                 |   |      |      |              |                    |              |   |       |       |       |       |
|                                      | <i>Head/Neck carcinoma</i>  | 1 | 488  | 1243 | 0.634        | 0.211-1.905        | 0.417        | F | 0.0   | 1.0   | 0.0   | NA    |
|                                      | <i>CLL</i>                  | 1 | 98   | 307  | 2.111        | 0.348-12.82        | 0.417        | F | 0.0   | 1.0   | 0.0   | NA    |
|                                      | <i>Lung cancer</i>          | 1 | 73   | 74   | 3.129        | 0.318-30.80        | 0.328        | F | 0.0   | 1.0   | 0.0   | NA    |
|                                      | <i>Bladder cancer</i>       | 1 | 618  | 622  | 0.250        | 0.028-2.247        | 0.216        | F | 0.0   | 1.0   | 0.0   | NA    |
|                                      | <i>Renal cell carcinoma</i> | 1 | 233  | 200  | 0.858        | 0.053-13.80        | 0.914        | F | 0.0   | 1.0   | 0.0   | NA    |
|                                      | Genotyping method           |   |      |      |              |                    |              |   |       |       |       |       |
|                                      | <i>TaqMan</i>               | 1 | 98   | 307  | 2.111        | 0.348-12.82        | 0.417        | F | 0.0   | 1.0   | 0.0   | NA    |
|                                      | <i>SNPlex technology</i>    | 2 | 851  | 822  | 0.402        | 0.072-2.248        | 0.299        | F | 0.465 | 0.495 | 0.0   | NA    |
|                                      | <i>Other methods</i>        | 2 | 561  | 1317 | 0.856        | 0.317-2.307        | 0.758        | F | 1.520 | 0.218 | 34.23 | NA    |
|                                      | Source of controls          |   |      |      |              |                    |              |   |       |       |       |       |
|                                      | <i>Population-based</i>     | 3 | 819  | 1750 | 0.876        | 0.360-2.134        | 0.771        | F | 1.246 | 0.536 | 0.0   | 0.639 |
|                                      | <i>Hospital-based</i>       | 2 | 691  | 696  | 0.840        | 0.172-4.092        | 0.829        | F | 2.439 | 0.118 | 59.01 | NA    |
|                                      | HWE in controls             |   |      |      |              |                    |              |   |       |       |       |       |
|                                      | <i>Equilibrium</i>          | 5 | 1510 | 2446 | 0.867        | 0.399-1.885        | 0.719        | F | 3.687 | 0.450 | 0.0   | 0.659 |
|                                      | Quality score               |   |      |      |              |                    |              |   |       |       |       |       |
|                                      | <i>High quality</i>         | 4 | 1437 | 2372 | 0.734        | 0.322-1.675        | 0.463        | F | 2.321 | 0.509 | 0.0   | 0.966 |
|                                      | <i>Low quality</i>          | 1 | 73   | 74   | 3.129        | 0.318-30.80        | 0.328        | F | 0.0   | 1.0   | 0.0   | NA    |
| Heterozygote model<br>(GA versus GG) | Overall                     | 5 | 1736 | 2892 | 0.872        | 0.630-1.208        | 0.410        | R | 9.922 | 0.042 | 59.69 | 0.918 |
|                                      | Geographical region         |   |      |      |              |                    |              |   |       |       |       |       |
|                                      | <i>Asian</i>                | 2 | 665  | 1631 | <b>0.758</b> | <b>0.595-0.965</b> | <b>0.025</b> | F | 1.339 | 0.247 | 25.34 | NA    |
|                                      | <i>European</i>             | 1 | 102  | 340  | 0.528        | 0.216-1.291        | 0.161        | F | 0.0   | 1.0   | 0.0   | NA    |
|                                      | <i>American</i>             | 2 | 969  | 921  | 1.017        | 0.582-1.778        | 0.953        | R | 3.302 | 0.069 | 69.72 | NA    |
|                                      | Cancer type                 |   |      |      |              |                    |              |   |       |       |       |       |
|                                      | <i>Head/Neck carcinoma</i>  | 1 | 571  | 1535 | <b>0.716</b> | <b>0.552-0.929</b> | <b>0.012</b> | F | 0.0   | 1.0   | 0.0   | NA    |
|                                      | <i>CLL</i>                  | 1 | 102  | 340  | 0.528        | 0.216-1.291        | 0.161        | F | 0.0   | 1.0   | 0.0   | NA    |
|                                      | <i>Lung cancer</i>          | 1 | 94   | 96   | 1.088        | 0.563-2.104        | 0.802        | F | 0.0   | 1.0   | 0.0   | NA    |
|                                      | <i>Bladder cancer</i>       | 1 | 707  | 687  | 1.306        | 0.937-1.822        | 0.115        | F | 0.0   | 1.0   | 0.0   | NA    |
|                                      | <i>Renal cell carcinoma</i> | 1 | 262  | 234  | 0.735        | 0.436-1.241        | 0.249        | F | 0.0   | 1.0   | 0.0   | NA    |
|                                      | Genotyping method           |   |      |      |              |                    |              |   |       |       |       |       |
|                                      | <i>TaqMan</i>               | 1 | 102  | 340  | 0.528        | 0.216-1.291        | 0.161        | F | 0.0   | 1.0   | 0.0   | NA    |
|                                      | <i>SNPlex technology</i>    | 2 | 969  | 921  | 1.017        | 0.582-1.778        | 0.953        | R | 3.302 | 0.069 | 69.72 | NA    |
|                                      | <i>Other methods</i>        | 2 | 665  | 1631 | <b>0.758</b> | <b>0.595-0.965</b> | <b>0.025</b> | F | 1.339 | 0.247 | 25.34 | NA    |
|                                      | Source of controls          |   |      |      |              |                    |              |   |       |       |       |       |
|                                      | <i>Population-based</i>     | 3 | 935  | 2109 | 0.706        | 0.563-0.884        | 0.002        | F | 0.441 | 0.802 | 0.0   | 0.480 |
|                                      | <i>Hospital-based</i>       | 2 | 801  | 783  | 1.259        | 0.935-1.694        | 0.129        | F | 0.235 | 0.628 | 0.0   | NA    |
|                                      | HWE in controls             |   |      |      |              |                    |              |   |       |       |       |       |
|                                      | <i>Equilibrium</i>          | 5 | 1736 | 2892 | 0.872        | 0.630-1.208        | 0.410        | R | 9.922 | 0.042 | 59.69 | 0.918 |
|                                      | Quality score               |   |      |      |              |                    |              |   |       |       |       |       |
|                                      | <i>High quality</i>         | 4 | 1642 | 2796 | 0.834        | 0.569-1.222        | 0.352        | R | 9.454 | 0.024 | 68.27 | 0.791 |
|                                      | <i>Low quality</i>          | 1 | 94   | 96   | 1.088        | 0.563-2.104        | 0.802        | F | 0.0   | 1.0   | 0.0   | NA    |

OR: odds ratio, CI: confidence interval, F: fixed model, R: random model, NA: not appreciable

Supplementary Table S27. Meta-analysis of the association between **PIWIL1 rs10773771 C > T** variant and cancer risk.

| Comparison                                         | Subgroups                  | No. of studies | Sample size |         | Test of association |                    |              |       | Test of heterogeneity |         |                    | Publication bias  |
|----------------------------------------------------|----------------------------|----------------|-------------|---------|---------------------|--------------------|--------------|-------|-----------------------|---------|--------------------|-------------------|
|                                                    |                            |                | Cancer      | Control | OR                  | 95% CI             | P-value      | Model | Q test                | P-value | I <sup>2</sup> (%) | P-value (Egger's) |
| <b>Allelic model</b><br>(T allele versus C allele) | <b>Overall</b>             | 7              | 10580       | 13696   | 0.971               | 0.921-1.023        | 0.267        | F     | 5.035                 | 0.539   | 0.0                | 0.676             |
|                                                    | <b>Geographical region</b> |                |             |         |                     |                    |              |       |                       |         |                    |                   |
|                                                    | <i>Asian</i>               | 6              | 9774        | 12996   | 0.962               | 0.911-1.015        | 0.158        | F     | 3.267                 | 0.659   | 0.0                | 0.744             |
|                                                    | <i>European</i>            | 1              | 806         | 700     | 1.111               | 0.904-1.366        | 0.316        | F     | 0.0                   | 1.0     | 0.0                | NA                |
|                                                    | <b>Cancer type</b>         |                |             |         |                     |                    |              |       |                       |         |                    |                   |
|                                                    | <i>Breast cancer</i>       | 2              | 2514        | 2452    | 1.082               | 0.966-1.212        | 0.174        | F     | 0.095                 | 0.758   | 0.0                | NA                |
|                                                    | <i>HCC</i>                 | 2              | 3194        | 3308    | 0.952               | 0.862-1.051        | 0.332        | F     | 0.055                 | 0.815   | 0.0                | NA                |
|                                                    | <i>Head/Neck carcinoma</i> | 2              | 1934        | 4884    | 0.926               | 0.831-1.031        | 0.158        | F     | 0.252                 | 0.616   | 0.0                | NA                |
|                                                    | <i>Cervical carcinoma</i>  | 1              | 2938        | 3052    | 0.947               | 0.854-1.049        | 0.298        | F     | 0.0                   | 1.0     | 0.0                | NA                |
|                                                    | <b>Genotyping method</b>   |                |             |         |                     |                    |              |       |                       |         |                    |                   |
|                                                    | <i>TaqMan</i>              | 6              | 9430        | 10596   | 0.975               | 0.921-1.032        | 0.380        | F     | 4.884                 | 0.430   | 0.0                | 0.697             |
|                                                    | <i>Other methods</i>       | 1              | 1150        | 3100    | 0.946               | 0.824-1.087        | 0.435        | F     | 0.0                   | 1.0     | 0.0                | NA                |
|                                                    | <b>Source of controls</b>  |                |             |         |                     |                    |              |       |                       |         |                    |                   |
|                                                    | <i>Population-based</i>    | 6              | 9956        | 13056   | 0.973               | 0.922-1.027        | 0.324        | F     | 4.883                 | 0.430   | 0.0                | 0.460             |
|                                                    | <i>Hospital-based</i>      | 1              | 624         | 640     | 0.930               | 0.744-1.162        | 0.522        | F     | 0.0                   | 1.0     | 0.0                | NA                |
|                                                    | <b>HWE in controls</b>     |                |             |         |                     |                    |              |       |                       |         |                    |                   |
|                                                    | <i>Equilibrium</i>         | 6              | 9796        | 11912   | 0.979               | 0.926-1.035        | 0.452        | F     | 4.067                 | 0.540   | 0.0                | 0.435             |
|                                                    | <i>Disequilibrium</i>      | 1              | 784         | 1784    | 0.895               | 0.754-1.061        | 0.201        | F     | 0.0                   | 1.0     | 0.0                | NA                |
| <b>Recessive model</b><br>(TT versus CC+CT)        | <b>Overall</b>             | 7              | 5290        | 6848    | 1.004               | 0.872-1.157        | 0.953        | R     | 11.81                 | 0.066   | 49.21              | 0.476             |
|                                                    | <b>Geographical region</b> |                |             |         |                     |                    |              |       |                       |         |                    |                   |
|                                                    | <i>Asian</i>               | 6              | 4887        | 6498    | 0.956               | 0.864-1.056        | 0.373        | F     | 4.016                 | 0.547   | 0.0                | 0.701             |
|                                                    | <i>European</i>            | 1              | 403         | 350     | <b>1.658</b>        | <b>1.141-2.408</b> | <b>0.008</b> | F     | 0.0                   | 1.0     | 0.0                | NA                |
|                                                    | <b>Cancer type</b>         |                |             |         |                     |                    |              |       |                       |         |                    |                   |
|                                                    | <i>Breast cancer</i>       | 2              | 1257        | 1226    | 1.310               | 0.866-1.981        | 0.201        | R     | 3.398                 | 0.065   | 70.57              | NA                |
|                                                    | <i>HCC</i>                 | 2              | 1597        | 1654    | 1.034               | 0.863-1.239        | 0.715        | F     | 0.218                 | 0.641   | 0.0                | NA                |
|                                                    | <i>Head/Neck carcinoma</i> | 2              | 967         | 2442    | 0.868               | 0.712-1.059        | 0.163        | F     | 0.695                 | 0.405   | 0.0                | NA                |
|                                                    | <i>Cervical carcinoma</i>  | 1              | 1469        | 1526    | 0.892               | 0.739-1.076        | 0.232        | F     | 0.0                   | 1.0     | 0.0                | NA                |
|                                                    | <b>Genotyping method</b>   |                |             |         |                     |                    |              |       |                       |         |                    |                   |
|                                                    | <i>TaqMan</i>              | 6              | 4715        | 5298    | 1.021               | 0.863-1.207        | 0.811        | R     | 11.55                 | 0.041   | 56.71              | 0.510             |
|                                                    | <i>Other methods</i>       | 1              | 575         | 1550    | 0.931               | 0.719-1.206        | 0.589        | F     | 0.0                   | 1.0     | 0.0                | NA                |
|                                                    | <b>Source of controls</b>  |                |             |         |                     |                    |              |       |                       |         |                    |                   |
|                                                    | <i>Population-based</i>    | 6              | 4978        | 6528    | 1.012               | 0.864-1.186        | 0.883        | R     | 11.77                 | 0.038   | 57.51              | 0.379             |
|                                                    | <i>Hospital-based</i>      | 1              | 312         | 320     | 0.951               | 0.641-1.412        | 0.805        | F     | 0.0                   | 1.0     | 0.0                | NA                |
|                                                    | <b>HWE in controls</b>     |                |             |         |                     |                    |              |       |                       |         |                    |                   |
|                                                    | <i>Equilibrium</i>         | 6              | 4898        | 5956    | 1.038               | 0.897-1.201        | 0.616        | R     | 9.390                 | 0.094   | 46.75              | 0.251             |
|                                                    | <i>Disequilibrium</i>      | 1              | 392         | 892     | 0.784               | 0.575-1.070        | 0.125        | F     | 0.0                   | 1.0     | 0.0                | NA                |
| <b>Dominant model</b><br>(CT+TT versus CC)         | <b>Overall</b>             | 7              | 5290        | 6848    | 0.944               | 0.874-1.019        | 0.138        | F     | 3.261                 | 0.775   | 0.0                | 0.782             |
|                                                    | <b>Geographical region</b> |                |             |         |                     |                    |              |       |                       |         |                    |                   |
|                                                    | <i>Asian</i>               | 6              | 4887        | 6498    | 0.947               | 0.875-1.025        | 0.181        | F     | 3.132                 | 0.680   | 0.0                | 0.952             |
|                                                    | <i>European</i>            | 1              | 403         | 350     | 0.896               | 0.667-1.203        | 0.465        | F     | 0.0                   | 1.0     | 0.0                | NA                |
|                                                    | <b>Cancer type</b>         |                |             |         |                     |                    |              |       |                       |         |                    |                   |
|                                                    | <i>Breast cancer</i>       | 2              | 1257        | 1226    | 1.031               | 0.874-1.215        | 0.719        | F     | 1.259                 | 0.262   | 20.54              | NA                |
|                                                    | <i>HCC</i>                 | 2              | 1597        | 1654    | 0.883               | 0.765-1.019        | 0.089        | F     | 0.0                   | 0.990   | 0.0                | NA                |
|                                                    | <i>Head/Neck carcinoma</i> | 2              | 967         | 2442    | 0.929               | 0.796-1.085        | 0.353        | F     | 0.0                   | 0.985   | 0.0                | NA                |
|                                                    | <i>Cervical carcinoma</i>  | 1              | 1469        | 1526    | 0.957               | 0.824-1.113        | 0.571        | F     | 0.0                   | 1.0     | 0.0                | NA                |
|                                                    | <b>Genotyping method</b>   |                |             |         |                     |                    |              |       |                       |         |                    |                   |

|                                      |                            |   |      |      |       |             |       |   |       |       |       |       |
|--------------------------------------|----------------------------|---|------|------|-------|-------------|-------|---|-------|-------|-------|-------|
|                                      | <i>TaqMan</i>              | 6 | 4715 | 5298 | 0.946 | 0.871-1.028 | 0.191 | F | 3.237 | 0.664 | 0.0   | 0.810 |
|                                      | <i>Other methods</i>       | 1 | 575  | 1550 | 0.930 | 0.762-1.135 | 0.477 | F | 0.0   | 1.0   | 0.0   | NA    |
|                                      | Source of controls         |   |      |      |       |             |       |   |       |       |       |       |
|                                      | <i>Population-based</i>    | 6 | 4978 | 6528 | 0.947 | 0.876-1.025 | 0.178 | F | 3.102 | 0.684 | 0.0   | 0.989 |
|                                      | <i>Hospital-based</i>      | 1 | 312  | 320  | 0.885 | 0.638-1.227 | 0.463 | F | 0.0   | 1.0   | 0.0   | NA    |
|                                      | HWE in controls            |   |      |      |       |             |       |   |       |       |       |       |
|                                      | <i>Equilibrium</i>         | 6 | 4898 | 5956 | 0.946 | 0.873-1.025 | 0.172 | F | 3.240 | 0.663 | 0.0   | 0.837 |
|                                      | <i>Disequilibrium</i>      | 1 | 392  | 892  | 0.927 | 0.724-1.188 | 0.551 | F | 0.0   | 1.0   | 0.0   | NA    |
|                                      | Quality score              |   |      |      |       |             |       |   |       |       |       |       |
|                                      | <i>High quality</i>        | 6 | 4887 | 6498 | 0.947 | 0.875-1.025 | 0.181 | F | 3.132 | 0.680 | 0.0   | 0.952 |
|                                      | <i>Low quality</i>         | 1 | 403  | 350  | 0.896 | 0.667-1.203 | 0.465 | F | 0.0   | 1.0   | 0.0   | NA    |
| Homozygote model<br>(TT versus CC)   | Overall                    | 7 | 2841 | 3597 | 0.957 | 0.860-1.066 | 0.424 | F | 7.017 | 0.319 | 14.50 | 0.560 |
|                                      | Geographical region        |   |      |      |       |             |       |   |       |       |       |       |
|                                      | <i>Asian</i>               | 6 | 2590 | 3415 | 0.930 | 0.833-1.040 | 0.204 | F | 3.362 | 0.644 | 0.0   | 0.741 |
|                                      | <i>European</i>            | 1 | 251  | 182  | 1.408 | 0.935-2.122 | 0.102 | F | 0.0   | 1.0   | 0.0   | NA    |
|                                      | Cancer type                |   |      |      |       |             |       |   |       |       |       |       |
|                                      | <i>Breast cancer</i>       | 2 | 686  | 637  | 1.217 | 0.965-1.535 | 0.097 | F | 0.713 | 0.398 | 0.0   | NA    |
|                                      | <i>HCC</i>                 | 2 | 878  | 854  | 0.950 | 0.777-1.161 | 0.616 | F | 0.117 | 0.732 | 0.0   | NA    |
|                                      | <i>Head/Neck carcinoma</i> | 2 | 513  | 1302 | 0.850 | 0.682-1.058 | 0.146 | F | 0.380 | 0.538 | 0.0   | NA    |
|                                      | <i>Cervical carcinoma</i>  | 1 | 764  | 804  | 0.884 | 0.717-1.091 | 0.251 | F | 0.0   | 1.0   | 0.0   | NA    |
|                                      | Genotyping method          |   |      |      |       |             |       |   |       |       |       |       |
|                                      | <i>TaqMan</i>              | 6 | 2537 | 2788 | 0.967 | 0.861-1.086 | 0.571 | F | 6.805 | 0.236 | 26.53 | 0.586 |
|                                      | <i>Other methods</i>       | 1 | 304  | 809  | 0.900 | 0.677-1.196 | 0.467 | F | 0.0   | 1.0   | 0.0   | NA    |
|                                      | Source of controls         |   |      |      |       |             |       |   |       |       |       |       |
|                                      | <i>Population-based</i>    | 6 | 2669 | 3427 | 0.962 | 0.861-1.074 | 0.490 | F | 6.896 | 0.229 | 27.49 | 0.392 |
|                                      | <i>Hospital-based</i>      | 1 | 172  | 170  | 0.887 | 0.570-1.381 | 0.595 | F | 0.0   | 1.0   | 0.0   | NA    |
|                                      | HWE in controls            |   |      |      |       |             |       |   |       |       |       |       |
|                                      | <i>Equilibrium</i>         | 6 | 2632 | 3104 | 0.978 | 0.874-1.095 | 0.703 | F | 5.546 | 0.353 | 9.841 | 0.320 |
|                                      | <i>Disequilibrium</i>      | 1 | 209  | 493  | 0.782 | 0.554-1.103 | 0.161 | F | 0.0   | 1.0   | 0.0   | NA    |
|                                      | Quality score              |   |      |      |       |             |       |   |       |       |       |       |
|                                      | <i>High quality</i>        | 6 | 2590 | 3415 | 0.930 | 0.833-1.040 | 0.204 | F | 3.362 | 0.644 | 0.0   | 0.741 |
|                                      | <i>Low quality</i>         | 1 | 251  | 182  | 1.408 | 0.935-2.122 | 0.102 | F | 0.0   | 1.0   | 0.0   | NA    |
| Heterozygote model<br>(CT versus CC) | Overall                    | 7 | 4362 | 5638 | 0.938 | 0.865-1.018 | 0.124 | F | 5.967 | 0.427 | 0.0   | 0.517 |
|                                      | Geographical region        |   |      |      |       |             |       |   |       |       |       |       |
|                                      | <i>Asian</i>               | 6 | 4051 | 5341 | 0.954 | 0.877-1.038 | 0.275 | F | 3.544 | 0.617 | 0.0   | 0.914 |
|                                      | <i>European</i>            | 1 | 311  | 297  | 0.734 | 0.533-1.010 | 0.058 | F | 0.0   | 1.0   | 0.0   | NA    |
|                                      | Cancer type                |   |      |      |       |             |       |   |       |       |       |       |
|                                      | <i>Breast cancer</i>       | 2 | 1019 | 1033 | 0.910 | 0.622-1.332 | 0.627 | R | 4.017 | 0.045 | 75.11 | NA    |
|                                      | <i>HCC</i>                 | 2 | 1313 | 1368 | 0.859 | 0.738-1.001 | 0.052 | F | 0.030 | 0.862 | 0.0   | NA    |
|                                      | <i>Head/Neck carcinoma</i> | 2 | 808  | 1993 | 0.962 | 0.815-1.134 | 0.641 | F | 0.101 | 0.751 | 0.0   | NA    |
|                                      | <i>Cervical carcinoma</i>  | 1 | 1222 | 1244 | 0.986 | 0.840-1.157 | 0.862 | F | 0.0   | 1.0   | 0.0   | NA    |
|                                      | Genotyping method          |   |      |      |       |             |       |   |       |       |       |       |
|                                      | <i>TaqMan</i>              | 6 | 3880 | 4354 | 0.938 | 0.859-1.024 | 0.152 | F | 5.966 | 0.310 | 16.19 | 0.566 |
|                                      | <i>Other methods</i>       | 1 | 482  | 1284 | 0.941 | 0.762-1.163 | 0.574 | F | 0.0   | 1.0   | 0.0   | NA    |
|                                      | Source of controls         |   |      |      |       |             |       |   |       |       |       |       |
|                                      | <i>Population-based</i>    | 6 | 4109 | 5381 | 0.941 | 0.866-1.023 | 0.157 | F | 5.849 | 0.321 | 14.52 | 0.605 |
|                                      | <i>Hospital-based</i>      | 1 | 253  | 257  | 0.884 | 0.622-1.255 | 0.490 | F | 0.0   | 1.0   | 0.0   | NA    |
|                                      | HWE in controls            |   |      |      |       |             |       |   |       |       |       |       |
|                                      | <i>Equilibrium</i>         | 6 | 4036 | 4929 | 0.933 | 0.856-1.016 | 0.109 | F | 5.763 | 0.330 | 13.23 | 0.451 |
|                                      | <i>Disequilibrium</i>      | 1 | 326  | 709  | 0.994 | 0.763-1.295 | 0.966 | F | 0.0   | 1.0   | 0.0   | NA    |
|                                      | Quality score              |   |      |      |       |             |       |   |       |       |       |       |
|                                      | <i>High quality</i>        | 6 | 4051 | 5341 | 0.954 | 0.877-1.038 | 0.275 | F | 3.544 | 0.617 | 0.0   | 0.914 |
|                                      | <i>Low quality</i>         | 1 | 311  | 297  | 0.734 | 0.533-1.010 | 0.058 | F | 0.0   | 1.0   | 0.0   | NA    |

OR: odds ratio, CI: confidence interval, F: fixed model, R: random model, NA: not appreciable.

Supplementary Table S28. Overall survival analysis.

| Gene name     | Mutation state | Kaplan Meier curve |                |                 |                  |                             |            |            |              | Cox regression |          |          |              |                 |
|---------------|----------------|--------------------|----------------|-----------------|------------------|-----------------------------|------------|------------|--------------|----------------|----------|----------|--------------|-----------------|
|               |                | No of samples      | Number at risk | Number of event | Number of censor | 5-year survival probability |            |            | Log test     | HR             | HR lower | HR upper | Wald test    | Likelihood test |
|               |                |                    |                |                 |                  | Mean                        | Lower mean | Upper mean |              |                |          |          |              |                 |
| DDX20         | WT             | 7713               | 1359           | 2079            | 4275             | 0.60                        | 0.58       | 0.61       |              |                |          |          |              |                 |
|               | MUT            | 49                 | 9              | 14              | 26               | 0.63                        | 0.45       | 0.76       | 0.441        | 0.82           | 0.49     | 1.36     | 0.442        | 0.427           |
| <b>DGCR8</b>  | <b>WT</b>      | 7683               | 1359           | 2064            | 4260             | 0.60                        | 0.58       | 0.61       |              |                |          |          |              |                 |
|               | <b>MUT</b>     | 79                 | 9              | 29              | 41               | 0.48                        | 0.32       | 0.63       | <b>0.026</b> | 1.51           | 1.05     | 2.18     | <b>0.027</b> | <b>0.038</b>    |
| GEMIN4        | WT             | 7711               | 1360           | 2079            | 4272             | 0.60                        | 0.58       | 0.61       |              |                |          |          |              |                 |
|               | MUT            | 51                 | 8              | 14              | 29               | 0.57                        | 0.36       | 0.73       | 0.576        | 1.14           | 0.72     | 1.81     | 0.577        | 0.585           |
| DICER1        | WT             | 7615               | 1341           | 2048            | 4226             | 0.60                        | 0.58       | 0.61       |              |                |          |          |              |                 |
|               | MUT            | 147                | 27             | 45              | 75               | 0.58                        | 0.48       | 0.67       | 0.416        | 1.12           | 0.85     | 1.49     | 0.417        | 0.425           |
| <b>PIWIL1</b> | <b>WT</b>      | 7639               | 1340           | 2068            | 4231             | 0.59                        | 0.58       | 0.61       |              |                |          |          |              |                 |
|               | <b>MUT</b>     | 123                | 28             | 25              | 70               | 0.69                        | 0.56       | 0.78       | <b>0.033</b> | 0.68           | 0.47     | 0.97     | <b>0.034</b> | <b>0.024</b>    |
| AGO1          | WT             | 7679               | 1361           | 2069            | 4249             | 0.60                        | 0.58       | 0.61       |              |                |          |          |              |                 |
|               | MUT            | 83                 | 7              | 24              | 52               | 0.53                        | 0.37       | 0.67       | 0.222        | 1.27           | 0.86     | 1.87     | 0.223        | 0.241           |
| TARBP2        | WT             | 7722               | 1360           | 2086            | 4276             | 0.60                        | 0.58       | 0.61       |              |                |          |          |              |                 |
|               | MUT            | 40                 | 8              | 7               | 25               | 0.70                        | 0.44       | 0.86       | 0.109        | 0.55           | 0.26     | 1.15     | 0.114        | 0.079           |
| AGO2          | WT             | 7666               | 1352           | 2066            | 4248             | 0.60                        | 0.58       | 0.61       |              |                |          |          |              |                 |
|               | MUT            | 96                 | 16             | 27              | 53               | 0.60                        | 0.47       | 0.72       | 0.902        | 0.98           | 0.67     | 1.42     | 0.902        | 0.902           |
| XPO5          | WT             | 7720               | 1359           | 2082            | 4279             | 0.60                        | 0.58       | 0.61       |              |                |          |          |              |                 |
|               | MUT            | 42                 | 9              | 11              | 22               | 0.67                        | 0.47       | 0.81       | 0.813        | 1.06           | 0.64     | 1.77     | 0.813        | 0.815           |
| RAN           | WT             | 7743               | 1363           | 2087            | 4293             | 0.60                        | 0.58       | 0.61       |              |                |          |          |              |                 |
|               | MUT            | 19                 | 5              | 6               | 8                | 0.61                        | 0.32       | 0.81       | 0.622        | 1.19           | 0.59     | 2.38     | 0.622        | 0.632           |
| DROSHA        | WT             | 7655               | 1349           | 2061            | 4245             | 0.60                        | 0.58       | 0.61       |              |                |          |          |              |                 |
|               | MUT            | 107                | 19             | 32              | 56               | 0.56                        | 0.43       | 0.68       | 0.983        | 1.00           | 0.71     | 1.39     | 0.983        | 0.983           |

Supplementary Table S29. Disease-specific survival analysis.

| Gene name     | Mutation state | Kaplan Meier curve |                |                 |                  |                             |            |            |              | Cox regression |          |          |              |                 |
|---------------|----------------|--------------------|----------------|-----------------|------------------|-----------------------------|------------|------------|--------------|----------------|----------|----------|--------------|-----------------|
|               |                | No of samples      | Number at risk | Number of event | Number of censor | 5-year survival probability |            |            | Log test     | HR             | HR lower | HR upper | Wald test    | Likelihood test |
|               |                |                    |                |                 |                  | Mean                        | Lower mean | Upper mean |              |                |          |          |              |                 |
| DDX20         | WT             | 7640               | 1359           | 1509            | 4772             | 0.68                        | 0.67       | 0.70       |              |                |          |          |              |                 |
|               | MUT            | 49                 | 9              | 13              | 27               | 0.66                        | 0.48       | 0.79       | 0.784        | 1.08           | 0.63     | 1.83     | 0.784        | 0.786           |
| DGCR8         | WT             | 7611               | 1359           | 1503            | 4749             | 0.68                        | 0.67       | 0.70       |              |                |          |          |              |                 |
|               | MUT            | 78                 | 9              | 19              | 50               | 0.58                        | 0.39       | 0.73       | 0.195        | 1.35           | 0.86     | 2.12     | 0.196        | 0.218           |
| GEMIN4        | WT             | 7640               | 1360           | 1511            | 4769             | 0.68                        | 0.67       | 0.70       |              |                |          |          |              |                 |
|               | MUT            | 49                 | 8              | 11              | 30               | 0.66                        | 0.45       | 0.80       | 0.469        | 1.22           | 0.71     | 2.11     | 0.470        | 0.484           |
| DICER1        | WT             | 7546               | 1340           | 1492            | 4714             | 0.68                        | 0.67       | 0.70       |              |                |          |          |              |                 |
|               | MUT            | 143                | 28             | 30              | 85               | 0.69                        | 0.59       | 0.78       | 0.974        | 0.99           | 0.70     | 1.42     | 0.974        | 0.974           |
| <b>PIWIL1</b> | <b>WT</b>      | 7569               | 1341           | 1507            | 4721             | 0.68                        | 0.67       | 0.70       |              |                |          |          |              |                 |
|               | <b>MUT</b>     | 120                | 27             | 15              | 78               | 0.79                        | 0.67       | 0.87       | <b>0.007</b> | 0.51           | 0.31     | 0.84     | <b>0.008</b> | <b>0.003</b>    |
| AGO1          | WT             | 7610               | 1360           | 1506            | 4744             | 0.68                        | 0.67       | 0.70       |              |                |          |          |              |                 |
|               | MUT            | 79                 | 8              | 16              | 55               | 0.65                        | 0.47       | 0.78       | 0.601        | 1.14           | 0.70     | 1.83     | 0.601        | 0.609           |
| TARBP2        | WT             | 7650               | 1360           | 1516            | 4774             | 0.68                        | 0.67       | 0.70       |              |                |          |          |              |                 |
|               | MUT            | 39                 | 8              | 6               | 25               | 0.72                        | 0.45       | 0.88       | 0.312        | 0.66           | 0.30     | 1.48     | 0.315        | 0.281           |
| AGO2          | WT             | 7596               | 1353           | 1503            | 4740             | 0.68                        | 0.67       | 0.70       |              |                |          |          |              |                 |
|               | MUT            | 93                 | 15             | 19              | 59               | 0.70                        | 0.56       | 0.80       | 0.878        | 0.97           | 0.61     | 1.52     | 0.878        | 0.877           |
| XPO5          | WT             | 7648               | 1359           | 1517            | 4772             | 0.68                        | 0.67       | 0.70       |              |                |          |          |              |                 |
|               | MUT            | 41                 | 9              | 5               | 27               | 0.81                        | 0.59       | 0.92       | 0.539        | 0.80           | 0.40     | 1.61     | 0.539        | 0.524           |
| RAN           | WT             | 7670               | 1363           | 1518            | 4789             | 0.68                        | 0.67       | 0.70       |              |                |          |          |              |                 |
|               | MUT            | 19                 | 5              | 4               | 10               | 0.69                        | 0.35       | 0.88       | 0.564        | 1.27           | 0.57     | 2.82     | 0.565        | 0.580           |
| DROSHA        | WT             | 7585               | 1349           | 1497            | 4739             | 0.68                        | 0.67       | 0.70       |              |                |          |          |              |                 |
|               | MUT            | 104                | 19             | 25              | 60               | 0.63                        | 0.48       | 0.74       | 0.948        | 1.01           | 0.69     | 1.49     | 0.948        | 0.948           |
